# Supplementary material
Source: HighWire-hosted journal article supplement (doi:10.1101/rna.080138.124)
Supplement: Supplemental_Legends.docx [file Supplemental_Legends.docx]

**Figure S1: Low doses of emetine, but not short s4U treatments disrupt translation**. A) Polysome traces obtained from cells treated with 500 µM s4U for an hour. A260 is shown on the y-axis and fractions are shown on the x-axis. B) Western blots using antibodies against ribosomal protein uS3 or against the collision sensor EDF1 do not show shift in EDF1 upon incubation of cells with s4U. C) Polysome traces obtained after sucrose gradient sedimentation of cells treated with emetine or left untreated for an hour. D) Western blots using antibodies against ribosomal protein uS3 or against the collision sensor EDF1 demonstrate a shift of the latter into the deeper fractions of the sucrose gradient upon emetine treatment. E) Bar graph showing the fraction of reads containing apparent T-to-C (top) or A-to-G (bottom) conversions after s4U and/or emetine.

**Figure S2: Low doses of emetine stabilize select short-lived transcripts.** A) RT-qPCR data from actinomycin D time course obtained using primers against mRNAs synthesized in response to emetine treatment (left) or against transcripts that remain unchanged upon emetine treatment (right). B) Violin plots from previously published RNA-seq data (Wu et al. 2019) from cells treated with actinomycin D for 1 (left), 3 (middle), or 6 hours (right) showing the log2(fold change) of actinomycin D compared to DMSO on the y-axis and the pertinent mRNA categories on the x-axis. C) Scatter plot showing the bakR-calculated mechanism statistic score on the y-axis and the log(mean half-life) calculated from K562 cells (Schofield et al. 2018) on the x-axis.

**Figure S3: Codon optimality alone does not drive ESM stabilization.** A) Codon enrichments scores for ESMs (top) and OSLs (bottom) are shown in the y-axis, while codons are shown on the x-axis. B) Western blots showing siRNA knock down efficiency for CNOT3 or CNOT4 with GAPDH as a loading control (left) and RT-qPCR data from knockdown samples using primers against three ESMs (right). C-D) Bar plot showing the log2(fold change) (C) or the log(mean half-life) (D) on the y-axis for transcripts in different categories outlined on the x-axis. The “subopt≥28” category represents mRNAs with a frequency of more than 28 codons per kb.

**Figure S4: Ribosomal occupancy at ESMs is unremarkable.** A) RT-qPCR data showing the polysomal distribution of *MAT2A*, which is an OSL, as well as for *GAPDH*, which also remains unchanged in emetine-treated cells (9 = gradient left over). B) CDF plot showing the log2(TE) for ESMs (blue), OSLs (green), C2H2 ZNF-encoding mRNAs (orange) and all expressed (gray) mRNAs on the x-axis and the fraction of mRNAs on the y-axis.

**Figure S5: Stabilization of select transcripts in response to translation inhibition is independent of ribosome collisions.** A) Western blots using antibodies against ZNF598, N4BP2 or beta-actin (loading control) in cells treated with siRNAs against ZNF598 (KD, top), N4BP2(KD, bottom), or with a scrambled siRNA control (siC). B-C) Volcano plot for RNA-seq data obtained from ZNF598 (B) or GIGYF2 (C) knock out cells showing the -log10 (adjusted p-value) on the y-axis and the log2(fold change) of KO versus WT on the x-axis (Hickey et al. 2020). ESMs are shown in blue. D) Box plot showing the log2(fold change) of ESMs in emetine-treated versus untreated WT or EDF1 KO HEK293 Flp-In TRex cells. E) Western blots using antibodies against eS10 or vinculin (loading control) performed on cells exposed to different doses of emetine. F-G) RT-qPCR using primers against ESMs in samples treated with increasing doses of emetine (F) or anisomycin (G).

**Table S1:** Includes DESeq2 and bakR results for all transcripts as well as a list of the ESMs, TCMs and OSLs (half-life ≥ 0.49 h).
