# Supplementary material
Source: HighWire-hosted journal article supplement (doi:10.1101/rna.080138.124)
Supplement: Supplemental_Table_S1.xlsx [file Supplemental_Table_S1.xlsx]

## Sheet: All DESeq2 results
external_gene_name	baseMean	log2FoldChange	lfcSE	stat	pvalue	padj
A1BG	221.322	-0.321005	0.195052	-1.64574	0.0998168	0.261458
A1BG-AS1	365.929	-0.0324725	0.139667	-0.232499	0.816151	0.90178
A4GALT	78.8362	-0.00573543	0.253757	-0.0226021	0.981968	0.991803
AAAS	4685.19	-0.197081	0.109558	-1.79888	0.0720378	0.217312
AACS	969.008	0.114379	0.0784118	1.4587	0.144647	0.323894
AADAT	487.484	0.265072	0.109798	2.41417	0.0157712	0.0902263
AAED1	325.532	-0.132855	0.11205	-1.18568	0.235748	0.430826
AAGAB	2817.05	-0.0299084	0.0718898	-0.416032	0.677387	0.812671
AAMDC	696.383	-0.223641	0.186418	-1.19968	0.230265	0.4245
AAMP	9440.5	-0.19371	0.0884563	-2.18989	0.028532	0.128257
AAR2	2613.77	0.0178726	0.0731143	0.244447	0.806885	0.896505
AARS	6911.02	0.0213929	0.0737377	0.290122	0.771723	0.874555
AARS2	2362.54	0.305362	0.102991	2.96494	0.00302746	0.0288156
AASDH	523.976	0.296758	0.104941	2.82785	0.00468619	0.0393582
AASDHPPT	2748.09	0.014389	0.130375	0.110367	0.912119	0.957396
AASS	1090.71	0.149578	0.112951	1.32427	0.185413	0.374929
AATF	4565.89	-0.0301113	0.0928773	-0.324206	0.745782	0.859793
ABAT	250.069	-0.0978561	0.157732	-0.620393	0.534999	0.708862
ABCA11P	235.918	-0.0295633	0.139721	-0.211589	0.832428	0.911207
ABCA2	830.738	-0.0221117	0.140424	-0.157464	0.874879	0.935404
ABCA3	754.673	-0.354053	0.104566	-3.38592	0.000709406	0.00985854
ABCA7	410.131	0.404078	0.146969	2.74941	0.00597022	0.0464858
ABCB1	421.484	0.0432072	0.154877	0.278977	0.780262	0.879462
ABCB10	1663.37	0.155089	0.162346	0.955302	0.339425	0.540115
ABCB6	713.272	0.190436	0.0957376	1.98915	0.0466847	0.168601
ABCB7	1151.98	0.102096	0.0830153	1.22984	0.218756	0.412323
ABCB8	1928.93	-0.0195584	0.0794957	-0.246031	0.805658	0.895877
ABCB9	442.486	0.0574412	0.10743	0.534683	0.592869	0.750774
ABCC1	1663.64	0.127149	0.136541	0.931214	0.351743	0.551337
ABCC10	945.35	0.291018	0.12443	2.33882	0.0193448	0.101962
ABCC4	978.104	-0.0215428	0.129823	-0.16594	0.868204	0.931058
ABCC5	1824.82	0.0352935	0.0840162	0.42008	0.674427	0.810478
ABCC6	113.1	0.0526928	0.149737	0.351902	0.724912	0.84477
ABCD1	3590.28	-0.125534	0.0677164	-1.85382	0.0637648	0.202867
ABCD3	2656.18	-0.105002	0.105643	-0.993932	0.320256	0.522092
ABCD4	1461.33	0.287927	0.0859342	3.35055	0.000806518	0.0107509
ABCE1	5155.96	-0.0517284	0.0830235	-0.623058	0.533246	0.708106
ABCF1	7581.91	-0.100554	0.0598716	-1.6795	0.0930548	0.249801
ABCF2	8066.94	-0.0925995	0.0538814	-1.71858	0.0856909	0.238721
ABCF3	2176.69	0.0805096	0.0824875	0.976022	0.329053	0.530738
ABCG2	100.185	-0.314851	0.186253	-1.69045	0.0909414	0.24641
ABHD10	2199.81	-0.020509	0.0735229	-0.278948	0.780285	0.879462
ABHD11	997.642	0.107006	0.133845	0.799482	0.424011	0.615996
ABHD12	1800.53	-0.119033	0.0909342	-1.309	0.190534	0.380599
ABHD13	183.637	0.208135	0.234603	0.887181	0.374982	0.573101
ABHD14A	574.608	-0.443806	0.165888	-2.67533	0.00746553	0.0539961
ABHD14B	2444.93	-0.210091	0.0959839	-2.18881	0.0286107	0.128556
ABHD15	554.399	-0.104597	0.112015	-0.933773	0.350421	0.550112
ABHD16A	1000.13	-0.0690998	0.0989779	-0.698133	0.485094	0.668531
ABHD17A	1265.72	-0.23108	0.159494	-1.44883	0.147384	0.327371
ABHD17B	786.722	0.276852	0.127477	2.17178	0.0298726	0.131528
ABHD17C	796.564	0.0824739	0.0951786	0.866518	0.386206	0.583803
ABHD2	1319.79	-0.0260498	0.145407	-0.179151	0.857819	0.925998
ABHD3	847.924	-0.0873136	0.151588	-0.575993	0.56462	0.730934
ABHD4	546.067	-0.0142142	0.0861843	-0.164927	0.869001	0.931712
ABHD5	728.959	-0.0142787	0.0801246	-0.178206	0.858561	0.926477
ABHD6	525.675	0.0526354	0.105534	0.498754	0.617953	0.769338
ABHD8	336.782	-0.211781	0.100112	-2.11544	0.0343921	0.141938
ABI1	1347.43	0.117835	0.112755	1.04505	0.295999	0.497914
ABI2	1801.19	0.0933696	0.114056	0.818629	0.412998	0.606018
ABL1	2348.67	0.27818	0.133052	2.09077	0.036549	0.146959
ABL2	1636.48	0.361044	0.1343	2.68834	0.00718076	0.0527143
ABLIM1	2195.96	0.0293204	0.0881075	0.33278	0.7393	0.854881
ABR	1152.58	-0.00759881	0.0988544	-0.0768687	0.938728	0.970547
ABRACL	1598.51	-0.239884	0.13103	-1.83075	0.0671384	0.209013
ABT1	4060.88	-0.116011	0.0941617	-1.23204	0.217932	0.411591
ABTB1	176.029	0.090655	0.161914	0.559897	0.57555	0.738307
ABTB2	610.687	0.187199	0.109137	1.71526	0.086297	0.239344
ACAA1	2409.62	-0.111356	0.130276	-0.854767	0.39268	0.589704
ACAA2	2245.54	-0.159402	0.118155	-1.34909	0.177309	0.365241
ACACA	3705.68	0.253296	0.12678	1.99792	0.0457252	0.166363
ACACB	352.005	0.623739	0.166446	3.7474	0.000178677	0.00325745
ACAD10	510.883	0.190824	0.108928	1.75183	0.0798033	0.230033
ACAD8	846.181	0.0366665	0.0769065	0.476768	0.633528	0.781153
ACAD9	2241.89	0.16402	0.0757335	2.16575	0.0303302	0.13269
ACADL	181.837	0.0890318	0.165376	0.538361	0.590328	0.749749
ACADM	1912.66	-0.161569	0.141327	-1.14323	0.252943	0.449306
ACADS	568.209	-0.0210411	0.0872028	-0.241289	0.809331	0.897443
ACADSB	957.09	-0.079304	0.129387	-0.612921	0.539928	0.712363
ACADVL	1523.66	0.00271244	0.116266	0.0233297	0.981387	0.991501
ACAP2	829.903	0.058779	0.202331	0.290509	0.771427	0.874403
ACAP3	1517.19	0.198111	0.102842	1.92635	0.0540604	0.184256
ACAT1	4603.79	-0.137939	0.104234	-1.32336	0.185715	0.375329
ACAT2	6835.57	-0.172477	0.10009	-1.72322	0.0848484	0.23754
ACBD3	1989.01	0.19241	0.168166	1.14417	0.252554	0.448821
ACBD4	308.605	-0.0816078	0.134002	-0.609006	0.54252	0.714264
ACBD5	477.593	0.169888	0.175433	0.968393	0.332848	0.535018
ACBD6	2969.03	-0.178406	0.112787	-1.5818	0.113695	0.281924
ACCS	165.473	0.225988	0.154207	1.46548	0.142789	0.321543
ACD	1519.03	-0.131524	0.137212	-0.958547	0.337787	0.53902
ACER3	824.988	0.000301885	0.11741	0.0025712	0.997948	0.99906
ACIN1	9852.98	0.0942103	0.0546869	1.72272	0.0849391	0.237594
ACLY	19089.2	-0.00161202	0.120135	-0.0134184	0.989294	0.995293
ACO1	1871.45	-0.0292266	0.0938606	-0.311383	0.755509	0.865009
ACO2	5543.39	-0.105955	0.0788286	-1.34412	0.178911	0.366662
ACOT1	292.321	-0.0623504	0.144268	-0.432184	0.665608	0.804158
ACOT11	81.6439	0.0204429	0.190474	0.107326	0.91453	0.958297
ACOT13	1300.42	-0.245947	0.150786	-1.63111	0.102868	0.266524
ACOT2	504.499	-0.0946064	0.117428	-0.805657	0.420441	0.612956
ACOT7	4432.5	-0.225453	0.110073	-2.04821	0.040539	0.155139
ACOT8	1183.92	-0.147239	0.123496	-1.19225	0.233162	0.427616
ACOT9	1118.44	-0.0948213	0.119388	-0.794225	0.427064	0.618538
ACOX1	923.3	0.073732	0.0961775	0.766624	0.443305	0.631367
ACOX3	412.537	-0.0249063	0.11808	-0.210928	0.832944	0.911463
ACP1	5039.81	-0.0979525	0.0820283	-1.19413	0.232427	0.426951
ACP2	1914.99	-0.117612	0.100607	-1.16903	0.242393	0.437411
ACP6	1090.18	-0.0762045	0.112233	-0.678987	0.497146	0.67941
ACSF2	329.664	0.0235561	0.118058	0.19953	0.841848	0.91725
ACSF3	1185.5	0.280425	0.0811802	3.45436	0.000551609	0.00805299
ACSL1	1058.67	-0.0116761	0.111071	-0.105122	0.916279	0.959698
ACSL3	2564.66	0.0311216	0.104076	0.299027	0.76492	0.87032
ACSL4	1144.9	0.016143	0.171662	0.0940394	0.925078	0.964055
ACSL6	122.669	-0.285947	0.171339	-1.6689	0.0951377	0.253387
ACSS1	852.359	-0.094934	0.0887901	-1.0692	0.284982	0.486199
ACSS2	688.04	-0.0969889	0.0803121	-1.20765	0.227182	0.421675
ACSS3	126.724	0.123179	0.20885	0.589799	0.555325	0.723964
ACTB	114869	-0.286558	0.0989144	-2.89703	0.00376719	0.033409
ACTG1	120593	-0.227245	0.0846267	-2.68527	0.0072472	0.0529497
ACTL6A	3026.68	-0.077733	0.0685693	-1.13364	0.256945	0.45378
ACTN1	3758.18	-0.105964	0.0876654	-1.20874	0.226764	0.421209
ACTN2	502.11	0.796407	0.129953	6.12844	8.87465e-10	6.73974e-08
ACTN4	8006.54	-0.0842411	0.110038	-0.765562	0.443937	0.632138
ACTR10	2070.3	-0.122936	0.0866751	-1.41836	0.156086	0.337802
ACTR1A	7827.57	-0.141192	0.0718298	-1.96564	0.0493399	0.174149
ACTR1B	2352.54	0.040807	0.0993131	0.410892	0.681152	0.815299
ACTR2	6027.99	-0.0723785	0.147461	-0.49083	0.623547	0.774157
ACTR3	4830.97	-0.0746824	0.0921857	-0.81013	0.417865	0.610274
ACTR3B	670.845	0.0688217	0.127218	0.540973	0.588526	0.748428
ACTR5	829.136	0.0171887	0.0925241	0.185776	0.852621	0.923344
ACTR6	1018.1	-0.054309	0.0903521	-0.601082	0.547786	0.718019
ACTR8	1291.07	0.129736	0.113018	1.14793	0.250998	0.446882
ACTRT3	131.418	0.152431	0.14434	1.05606	0.290942	0.492315
ACVR1	368.444	0.0513836	0.10754	0.477808	0.632787	0.780568
ACVR1B	1051.12	0.0379323	0.0874035	0.433991	0.664295	0.803202
ACVR2A	658.599	0.441408	0.0802206	5.50243	3.74597e-08	1.95152e-06
ACVR2B	1598.24	0.0516308	0.136006	0.379622	0.704226	0.830919
ACYP1	443.709	0.0242189	0.136112	0.177934	0.858775	0.926477
ADA	1135.43	-0.179664	0.110882	-1.62031	0.105165	0.269703
ADAL	441.32	0.0696346	0.117195	0.594175	0.552395	0.721798
ADAM10	861.158	-0.0405599	0.189228	-0.214344	0.830279	0.910025
ADAM11	1017.82	-0.0078617	0.0808305	-0.0972616	0.922519	0.963023
ADAM15	3460.43	-0.103766	0.0655701	-1.58252	0.11353	0.281644
ADAM17	422.304	0.502447	0.242199	2.07452	0.0380308	0.149899
ADAM22	395.925	0.109792	0.138565	0.792351	0.428156	0.61919
ADAM23	746.157	-0.106131	0.0898456	-1.18126	0.237498	0.432728
ADAM9	1468.01	0.0869785	0.215469	0.40367	0.686455	0.819225
ADAMTS1	2868.68	0.953713	0.181819	5.24539	1.5595e-07	7.21787e-06
ADAMTS13	332.376	0.15934	0.103863	1.53413	0.124997	0.296126
ADAMTS15	242.376	0.465329	0.137083	3.3945	0.000687536	0.00962908
ADAMTS17	250.958	0.383687	0.120429	3.18601	0.00144251	0.0170197
ADAMTS2	374.909	-0.190856	0.116694	-1.63552	0.101939	0.265016
ADAP1	393.836	-0.229524	0.0947297	-2.42294	0.0153956	0.0887841
ADAP2	220.463	-0.0492694	0.144403	-0.341194	0.732958	0.849813
ADAR	8543.58	0.0315771	0.136937	0.230595	0.817629	0.902488
ADARB1	949.065	0.104056	0.084155	1.23648	0.216279	0.409544
ADAT1	269.611	0.404659	0.276526	1.46337	0.143366	0.322005
ADAT2	1276.42	-0.0523867	0.098374	-0.532526	0.594362	0.751947
ADAT3	720.05	0.157794	0.16306	0.967707	0.333191	0.535249
ADCK1	768.211	-0.0307642	0.118747	-0.259074	0.795578	0.890061
ADCK2	1925.04	-0.113931	0.0910646	-1.2511	0.210899	0.403465
ADCK3	4086	0.0261814	0.0609319	0.429683	0.667426	0.805994
ADCK4	1024	0.0618581	0.101937	0.606829	0.543964	0.715257
ADCK5	261.013	0.177305	0.134942	1.31393	0.188868	0.37865
ADCY1	636.858	-0.104892	0.119396	-0.878523	0.37966	0.577412
ADCY3	1788.74	0.0283134	0.10551	0.268347	0.788432	0.885416
ADCY6	778.126	-0.3157	0.125787	-2.5098	0.0120801	0.0757835
ADCY7	157.327	0.302664	0.175207	1.72746	0.0840845	0.236146
ADCY9	1058.82	0.113781	0.13117	0.867434	0.385704	0.583377
ADCYAP1R1	221.701	-0.09583	0.118271	-0.810261	0.41779	0.610274
ADD1	3860.55	-0.0456054	0.0720485	-0.632982	0.526745	0.703545
ADD2	1243.62	-0.0363752	0.125318	-0.290263	0.771615	0.874524
ADD3	1046.27	0.0819654	0.163351	0.501774	0.615827	0.768003
ADGRA2	782.964	0.121785	0.10089	1.2071	0.227394	0.421972
ADGRA3	1227.32	-0.00814896	0.102875	-0.0792123	0.936864	0.969498
ADGRB1	112.884	0.258692	0.169828	1.52326	0.127694	0.299555
ADGRB2	524.314	0.113298	0.143163	0.791387	0.428718	0.619546
ADGRE5	567.074	-0.0115815	0.116296	-0.0995863	0.920673	0.961896
ADGRL1	4108.62	-0.126262	0.0823144	-1.5339	0.125053	0.296194
ADGRL2	2116.72	0.184147	0.171373	1.07454	0.282579	0.483397
ADGRV1	356.698	0.274136	0.190372	1.44	0.149868	0.331184
ADH5	5102.1	-0.220783	0.0746894	-2.95601	0.00311642	0.029353
ADI1	5933.83	-0.247426	0.102275	-2.41921	0.0155544	0.089422
ADIPOR1	4389.72	-0.195714	0.0673629	-2.90536	0.00366828	0.0328016
ADIPOR2	3360.75	0.0257262	0.0662548	0.388291	0.6978	0.826071
ADK	1611.3	-0.179304	0.10203	-1.75737	0.0788542	0.228654
ADM	380.669	0.312616	0.134279	2.32811	0.0199063	0.104045
ADM5	287.939	-0.478585	0.159794	-2.99501	0.00274434	0.0267827
ADNP	3471.2	0.27581	0.116805	2.36128	0.0182121	0.0982852
ADNP2	1133.81	0.277275	0.13105	2.11579	0.0343623	0.141909
ADO	1628.26	0.0811295	0.0861621	0.941592	0.346402	0.546539
ADORA2B	622.973	0.0341514	0.0855627	0.399139	0.689791	0.821049
ADPGK	2506.12	0.00534445	0.0705283	0.0757775	0.939596	0.970556
ADPRHL1	88.742	-0.0138119	0.200396	-0.0689232	0.945051	0.973672
ADPRHL2	2155.51	0.155747	0.114549	1.35966	0.173938	0.361082
ADPRM	185.767	0.62549	0.16191	3.8632	0.000111913	0.00221893
ADRA2C	964.232	-0.290349	0.138711	-2.09319	0.0363326	0.146636
ADRB2	102.995	0.102873	0.222956	0.461405	0.644508	0.789905
ADRBK1	3506.46	-0.117911	0.0649696	-1.81486	0.0695454	0.212639
ADRBK2	880.319	-0.00109486	0.1126	-0.00972338	0.992242	0.996125
ADRM1	7750.42	-0.230242	0.111837	-2.05872	0.0395207	0.153032
ADSL	8090.75	-0.161525	0.0853923	-1.89156	0.0585491	0.19317
ADSS	2229.55	-0.0499004	0.117183	-0.425832	0.67023	0.807947
ADSSL1	85.9186	0.15175	0.18863	0.804485	0.421117	0.613603
AEBP2	885.031	0.248069	0.143666	1.7267	0.0842215	0.236399
AEN	2674.69	0.430854	0.0808798	5.32709	9.97961e-08	4.73753e-06
AES	4621.12	-0.342689	0.115483	-2.96744	0.00300287	0.0287305
AFAP1	529.917	0.384915	0.166467	2.31226	0.0207635	0.106473
AFAP1L1	348.796	0.0286124	0.127489	0.224431	0.822422	0.905185
AFF4	1575.17	0.292152	0.216703	1.34817	0.177604	0.365372
AFG3L1P	1567.49	0.532833	0.0670931	7.9417	1.99436e-15	4.30145e-13
AFG3L2	3319.19	0.0167528	0.0600009	0.27921	0.780084	0.879462
AFMID	1073.7	-0.000415842	0.0976742	-0.00425744	0.996603	0.998479
AFTPH	594.046	0.393397	0.156734	2.50996	0.0120745	0.0757835
AGA	494.654	-0.0806595	0.114422	-0.704931	0.480853	0.664439
AGAP1	974.195	0.0891321	0.141513	0.629852	0.528792	0.704794
AGAP2-AS1	496.026	-0.226527	0.132082	-1.71505	0.0863361	0.239344
AGAP3	5266.63	-0.0335159	0.0614995	-0.544979	0.585768	0.746946
AGAP6	705.671	0.299049	0.109782	2.72402	0.0064492	0.0493322
AGAP9	684.458	0.1767	0.0987208	1.7899	0.0734697	0.219716
AGBL5	3701.87	-0.144589	0.0824953	-1.7527	0.0796542	0.229806
AGFG1	2206.02	-0.00447347	0.0818334	-0.0546655	0.956405	0.978638
AGFG2	424.862	0.229037	0.110934	2.06463	0.0389582	0.15182
AGGF1	966.873	0.0396793	0.108214	0.366675	0.713861	0.836588
AGK	3183.47	0.0657757	0.0670367	0.98119	0.326499	0.528515
AGL	1505.72	0.0162767	0.159583	0.101996	0.91876	0.960977
AGO1	1344.55	0.0954726	0.151468	0.630314	0.528489	0.704478
AGO2	705.173	-0.0193833	0.0986119	-0.196561	0.844171	0.918529
AGO3	317.712	0.123675	0.137644	0.89851	0.368914	0.568825
AGPAT1	6141.38	-0.255848	0.0898412	-2.84778	0.00440258	0.0375613
AGPAT2	2748.99	-0.220621	0.114961	-1.9191	0.0549717	0.18601
AGPAT3	1902.17	-0.204968	0.0662231	-3.09511	0.00196739	0.0211952
AGPAT4	849.667	0.233381	0.0785142	2.97246	0.0029542	0.0283435
AGPAT5	981.245	-0.105785	0.155908	-0.678504	0.497452	0.679656
AGPS	2340.24	0.00767217	0.117893	0.0650774	0.948112	0.975522
AGRN	1777.91	-0.155017	0.116667	-1.32872	0.183942	0.373602
AGTPBP1	1339.88	0.128714	0.115793	1.11158	0.266317	0.464569
AGTRAP	2189.03	-0.315368	0.11658	-2.70517	0.00682689	0.0511258
AHCTF1	1304.97	0.306563	0.142439	2.15224	0.0313784	0.135176
AHCY	12444.2	-0.205676	0.0784579	-2.62149	0.00875471	0.0605392
AHCYL1	4057.06	0.0191404	0.0727218	0.2632	0.792396	0.88809
AHCYL2	561.238	0.114635	0.162355	0.706074	0.480142	0.663817
AHI1	409.181	0.199324	0.110604	1.80214	0.0715235	0.216174
AHNAK	1058.22	0.014264	0.156342	0.0912362	0.927305	0.965256
AHRR	622.426	0.313546	0.130297	2.40638	0.0161113	0.091589
AHSA1	9473.31	-0.1477	0.121715	-1.21349	0.224941	0.419043
AHSA2	563.581	0.127293	0.0984807	1.29257	0.196161	0.387053
AIDA	427.374	-0.207792	0.131526	-1.57985	0.114141	0.282639
AIF1L	2107.85	-0.0975007	0.0750634	-1.29891	0.193974	0.384548
AIFM1	7255.85	-0.102405	0.083099	-1.23233	0.217826	0.411533
AIFM2	102.816	0.0282797	0.255385	0.110734	0.911828	0.95737
AIG1	1081.74	-0.250337	0.112291	-2.22937	0.0257891	0.12076
AIMP1	2137.93	-0.166739	0.0983411	-1.69552	0.0899766	0.245151
AIMP2	4932.9	-0.128258	0.118919	-1.07854	0.280794	0.48103
AIP	2672.57	-0.21987	0.134634	-1.6331	0.102448	0.265909
AJUBA	336.894	0.222932	0.129766	1.71795	0.0858056	0.238794
AK1	2469.53	-0.274151	0.15559	-1.762	0.0780688	0.227389
AK2	11953.1	-0.185557	0.0882828	-2.10184	0.0355671	0.144536
AK3	1365.17	-0.101558	0.0837338	-1.21287	0.22518	0.419257
AK4	1199.86	-0.12512	0.0848366	-1.47483	0.140257	0.317426
AK5	74.2292	0.0588725	0.266129	0.221218	0.824923	0.906745
AK6	1130.08	-0.0232135	0.108317	-0.214311	0.830304	0.910025
AKAP1	4789.81	0.00305504	0.0979259	0.0311975	0.975112	0.988856
AKAP10	596.511	0.415474	0.125544	3.3094	0.000934964	0.0121478
AKAP11	695.486	0.239466	0.232376	1.03051	0.302769	0.504257
AKAP12	2975.93	0.00648783	0.159324	0.0407211	0.967518	0.985084
AKAP13	997.464	0.451456	0.160092	2.81997	0.00480279	0.0398655
AKAP17A	1895.8	0.411994	0.0879784	4.6829	2.82842e-06	9.90313e-05
AKAP7	258.169	0.147197	0.133119	1.10576	0.268832	0.466841
AKAP8	2429.66	0.24372	0.0631437	3.85977	0.000113492	0.00224569
AKAP8L	2517.42	0.381469	0.0874417	4.36255	1.28555e-05	0.000352579
AKIP1	897.518	0.0528629	0.133624	0.395609	0.692394	0.822924
AKIRIN1	3679.3	0.0740617	0.0755655	0.980099	0.327037	0.529068
AKIRIN2	1811.05	0.395333	0.0973347	4.06159	4.87406e-05	0.00113036
AKR1A1	2634.23	-0.0998619	0.118831	-0.840369	0.400701	0.596611
AKR1B1	12427.8	-0.261994	0.104795	-2.50006	0.0124171	0.0773574
AKR7A2	3680.42	-0.240249	0.115553	-2.07913	0.0376057	0.149041
AKT1	4982.58	-0.154307	0.0655101	-2.35547	0.0184992	0.0992404
AKT1S1	5278.29	-0.260162	0.11289	-2.30456	0.0211915	0.107898
AKT2	4654.09	-0.0979845	0.0847202	-1.15657	0.24745	0.442831
AKT3	1464.49	0.0116043	0.139755	0.0830331	0.933825	0.968137
AKTIP	363.702	-0.0176375	0.103635	-0.170189	0.864861	0.929506
ALAD	1010.71	0.0638871	0.0827513	0.772037	0.440093	0.628606
ALAS1	2180.48	-0.219031	0.0646252	-3.38925	0.000700838	0.00977728
ALCAM	1350.05	-0.042284	0.140298	-0.301388	0.763119	0.869188
ALDH16A1	1640.53	0.167112	0.0918805	1.81879	0.068943	0.212169
ALDH18A1	6223.87	-0.00937307	0.092258	-0.101596	0.919077	0.961145
ALDH1A2	1440.2	-0.084941	0.0716503	-1.18549	0.235822	0.430889
ALDH1B1	3350.7	-0.0180008	0.0763927	-0.235635	0.813716	0.900121
ALDH1L2	535.575	0.235429	0.189905	1.23972	0.215078	0.408274
ALDH2	1989.85	-0.190601	0.0708602	-2.68981	0.00714917	0.0525898
ALDH3A2	2313.38	-0.0894402	0.0665618	-1.34372	0.17904	0.366857
ALDH4A1	875.907	0.0529693	0.109832	0.482275	0.629611	0.778638
ALDH5A1	1051.14	-0.027334	0.09733	-0.280838	0.778835	0.87846
ALDH6A1	634.608	-0.0614162	0.135339	-0.453795	0.649977	0.793451
ALDH7A1	3139.06	-0.0779532	0.121024	-0.644113	0.519502	0.697065
ALDH9A1	4185.08	-0.0758461	0.0511006	-1.48425	0.137742	0.313975
ALDOA	70435.2	-0.339293	0.121935	-2.78258	0.00539291	0.0431433
ALDOC	884.861	-0.263703	0.133236	-1.97922	0.0477912	0.170939
ALG1	1913.61	-0.139145	0.0861592	-1.61498	0.106316	0.270797
ALG10	311.939	-0.0614729	0.105978	-0.580052	0.561879	0.729395
ALG10B	499.53	0.0242591	0.187735	0.12922	0.897183	0.949037
ALG11	145.727	-0.207994	0.178772	-1.16346	0.244643	0.439925
ALG12	1943.59	-0.0858336	0.087778	-0.977848	0.328149	0.530116
ALG13	2325.46	0.0756021	0.0803915	0.940425	0.347	0.547003
ALG14	863.032	-0.167094	0.121382	-1.3766	0.168636	0.35512
ALG2	1232	-0.0996191	0.0667474	-1.49248	0.135573	0.311069
ALG3	3682.33	-0.320707	0.137766	-2.32791	0.019917	0.104045
ALG5	1076.37	-0.161231	0.113305	-1.42298	0.154742	0.336612
ALG6	1230.54	-0.145844	0.0866366	-1.6834	0.0922981	0.248711
ALG8	3418.38	-0.183907	0.110349	-1.6666	0.0955946	0.254038
ALG9	834.645	-0.0675758	0.102096	-0.661884	0.508045	0.686968
ALKBH1	932.917	0.397818	0.0919148	4.32812	1.50387e-05	0.00040616
ALKBH2	1684.04	-0.0203358	0.162826	-0.124893	0.900608	0.951147
ALKBH3	1260.55	-0.0760673	0.140223	-0.542474	0.587492	0.747818
ALKBH4	1325.81	0.195684	0.0835835	2.34118	0.0192229	0.101418
ALKBH5	6120.98	-0.0285072	0.0739004	-0.385751	0.699681	0.827523
ALKBH6	595.393	-0.0491692	0.110713	-0.444114	0.65696	0.797448
ALKBH7	1001.23	-0.356691	0.160587	-2.22117	0.0263394	0.122117
ALKBH8	704.147	0.382433	0.124599	3.06932	0.00214544	0.0224844
ALMS1	821.034	0.319632	0.175801	1.81815	0.0690419	0.212287
ALPK1	132.939	0.109011	0.189518	0.575202	0.565155	0.731168
ALPL	425.337	-0.222628	0.101164	-2.20067	0.027759	0.125938
ALS2	977.305	0.368245	0.12892	2.85638	0.00428501	0.036791
ALX1	442.133	0.398627	0.112566	3.54128	0.000398186	0.00614311
ALX4	642.032	0.211469	0.111976	1.88852	0.0589563	0.1937
ALYREF	8481.04	-0.279438	0.115576	-2.41778	0.0156157	0.089622
AMBRA1	1531.14	0.484377	0.117533	4.12119	3.76915e-05	0.000901253
AMD1	8991	0.162493	0.108168	1.50223	0.133037	0.307651
AMDHD2	969.534	0.0181528	0.0956794	0.189726	0.849524	0.920916
AMER1	732.125	0.0594342	0.157818	0.3766	0.706471	0.832177
AMFR	2087.09	-0.0361854	0.0852383	-0.424521	0.671186	0.808595
AMH	484.538	0.196158	0.244188	0.803307	0.421797	0.613919
AMIGO1	111.142	0.311523	0.227662	1.36836	0.1712	0.357865
AMIGO3	870.899	0.0485943	0.0857185	0.566905	0.570779	0.73483
AMMECR1	1277.33	-0.00100853	0.139967	-0.00720551	0.994251	0.997488
AMMECR1L	1511.64	0.389598	0.108933	3.5765	0.000348231	0.00549275
AMN1	179.132	-0.126995	0.158371	-0.801882	0.422621	0.614639
AMOT	20310.5	0.10978	0.117204	0.936651	0.348938	0.548774
AMOTL1	1908.17	0.185078	0.134334	1.37775	0.16828	0.35477
AMOTL2	403.196	0.746392	0.172517	4.32648	1.51514e-05	0.000407464
AMPD2	3557.8	0.0476638	0.0755473	0.630913	0.528097	0.704192
AMPH	353.356	-0.105211	0.105302	-0.999137	0.317729	0.519779
AMZ2	2790.52	-0.200521	0.0971461	-2.06411	0.0390068	0.151914
AMZ2P1	318.334	0.00111695	0.173269	0.00644636	0.994857	0.997817
ANAPC1	1215.28	0.230347	0.181216	1.27112	0.203686	0.395424
ANAPC10	484.589	0.190331	0.118667	1.60391	0.108734	0.274354
ANAPC11	3106.13	-0.277627	0.154486	-1.79709	0.0723208	0.21773
ANAPC13	2367.47	-0.172584	0.0968754	-1.7815	0.0748306	0.221696
ANAPC15	2716.08	-0.313967	0.158419	-1.98187	0.0474936	0.170301
ANAPC16	2339.57	-0.201496	0.114704	-1.75666	0.0789762	0.22877
ANAPC2	1862.93	0.0844259	0.0700821	1.20467	0.22833	0.42286
ANAPC4	1164.38	0.192568	0.0788776	2.44135	0.0146324	0.0855264
ANAPC5	10074.6	-0.139141	0.0615352	-2.26116	0.0237495	0.115575
ANAPC7	5335.17	0.00948752	0.0792101	0.119777	0.90466	0.953405
ANGEL1	1590.23	0.141245	0.163411	0.864359	0.387391	0.585101
ANGEL2	1067.1	0.23639	0.158344	1.49288	0.135468	0.310944
ANK2	412.596	0.18784	0.203979	0.92088	0.357113	0.557243
ANK3	500.96	0.100126	0.174526	0.573703	0.566169	0.731731
ANKEF1	137.97	0.068279	0.186852	0.365419	0.714799	0.837353
ANKFY1	2883.72	0.158689	0.124691	1.27266	0.20314	0.394773
ANKH	1250.06	-0.19064	0.0803781	-2.37179	0.0177022	0.0964633
ANKHD1	685.041	-0.0351803	0.162999	-0.215831	0.829119	0.909492
ANKIB1	603.455	0.166635	0.231401	0.720114	0.471455	0.656954
ANKLE2	3160.39	0.209421	0.0837419	2.50079	0.0123916	0.0772435
ANKMY2	701.45	0.142589	0.0953566	1.49533	0.134829	0.310219
ANKRA2	189.738	0.133927	0.150866	0.887718	0.374692	0.572903
ANKRD10	547.614	-0.032567	0.111622	-0.291761	0.770469	0.874083
ANKRD11	1293.71	0.234741	0.225839	1.03942	0.298612	0.500502
ANKRD13A	1421.64	0.0177651	0.0907273	0.195808	0.844761	0.918892
ANKRD13B	1020.37	0.00139865	0.0925155	0.015118	0.987938	0.994873
ANKRD13C	810.241	0.0949204	0.153814	0.617112	0.537161	0.710118
ANKRD13D	566.183	0.351225	0.111302	3.15559	0.00160172	0.018317
ANKRD16	588.701	0.278431	0.132234	2.1056	0.0352394	0.143571
ANKRD17	2629.12	0.403162	0.196297	2.05384	0.0399909	0.154187
ANKRD19P	975.71	0.0611683	0.118839	0.514716	0.606752	0.761547
ANKRD23	127.201	0.72631	0.164631	4.41174	1.02542e-05	0.000291003
ANKRD26	386.781	0.491969	0.124832	3.94103	8.11312e-05	0.0017252
ANKRD27	1060.25	0.365375	0.123542	2.95749	0.00310153	0.029288
ANKRD28	1116.68	0.197091	0.130811	1.50669	0.131891	0.306006
ANKRD34A	177.254	0.150981	0.129287	1.16779	0.242892	0.437975
ANKRD39	816.367	-0.197138	0.139168	-1.41654	0.156616	0.338534
ANKRD40	2354.72	-0.10577	0.111392	-0.949527	0.342353	0.542916
ANKRD42	373.018	-0.0558406	0.150349	-0.371406	0.710335	0.83455
ANKRD46	660.174	-0.174605	0.14429	-1.2101	0.22624	0.420577
ANKRD49	673.575	0.345678	0.102289	3.37941	0.000726406	0.00998087
ANKRD52	3218.24	0.104049	0.156013	0.666928	0.504818	0.684
ANKRD54	2474.89	0.015333	0.100321	0.152839	0.878525	0.937743
ANKRD6	406.994	-0.0817549	0.11256	-0.726321	0.467642	0.653583
ANKRD9	236.796	-0.168365	0.222127	-0.75797	0.448469	0.635184
ANKS1A	1666.51	0.200051	0.137359	1.45641	0.145279	0.324769
ANKS3	888.752	0.281036	0.079312	3.54342	0.000394973	0.00610228
ANKS6	1925.95	-0.00482515	0.0841095	-0.0573674	0.954253	0.977828
ANKZF1	1090.17	0.242912	0.0874873	2.77654	0.00549413	0.0437645
ANLN	2120.6	0.108059	0.182808	0.591107	0.554449	0.723352
ANO10	1161.07	-0.107493	0.0863993	-1.24414	0.213447	0.406465
ANO5	561.708	-0.031292	0.161356	-0.193932	0.846229	0.91965
ANO6	761.223	0.0976069	0.166578	0.585954	0.557907	0.725928
ANO7	186.731	-0.304504	0.183692	-1.65769	0.09738	0.257326
ANO8	221.46	0.305205	0.135476	2.25284	0.0242693	0.116587
ANP32A	10083.2	-0.183587	0.0895946	-2.04909	0.0404534	0.155139
ANP32B	11534.3	-0.17209	0.122514	-1.40466	0.160123	0.343551
ANP32E	5303.81	-0.130806	0.125812	-1.0397	0.298481	0.500438
ANTXR1	1185.36	-0.148507	0.1277	-1.16294	0.244853	0.440083
ANTXR2	318.262	-0.135169	0.136248	-0.992076	0.32116	0.523171
ANXA11	5606.86	-0.193218	0.0950544	-2.03271	0.0420814	0.158397
ANXA2	2785.95	-0.303388	0.130155	-2.33098	0.0197546	0.103515
ANXA2P2	104.208	0.00758004	0.168992	0.0448545	0.964223	0.982753
ANXA4	358.27	-0.115879	0.127399	-0.909571	0.363049	0.562795
ANXA5	6822.53	-0.182573	0.0729719	-2.50197	0.0123506	0.0770767
ANXA6	6490.89	-0.15699	0.0642545	-2.44325	0.0145557	0.0852154
ANXA7	2782.76	-0.091835	0.0718025	-1.27899	0.200899	0.39241
AP1AR	898.994	0.124532	0.207264	0.600834	0.54795	0.718081
AP1B1	8318.35	-0.149397	0.0867205	-1.72274	0.0849354	0.237594
AP1G1	2889.24	0.182765	0.151915	1.20308	0.228946	0.423417
AP1G2	1143.43	0.333497	0.108009	3.08767	0.00201732	0.0215528
AP1M1	3958.23	-0.126403	0.0607953	-2.07915	0.0376031	0.149041
AP1S1	2014.95	-0.276419	0.11109	-2.48824	0.0128377	0.0787748
AP1S2	1861.12	-0.15251	0.0881685	-1.72976	0.0836737	0.235697
AP1S3	309.828	0.0581189	0.216894	0.26796	0.78873	0.885454
AP2A1	3171.27	-0.0528543	0.0734593	-0.719505	0.47183	0.657222
AP2A2	3693.89	0.000328593	0.0602302	0.00545562	0.995647	0.998239
AP2B1	7796.2	-0.0394794	0.105365	-0.37469	0.707891	0.833122
AP2M1	17656.3	-0.277377	0.0884821	-3.13484	0.00171946	0.0193006
AP2S1	6646.01	-0.305605	0.139114	-2.19679	0.0280354	0.126839
AP3B1	1887.95	0.0211723	0.113552	0.186456	0.852088	0.922952
AP3D1	7492.11	0.0525353	0.0908981	0.577959	0.563292	0.730044
AP3M1	2722.32	0.0768298	0.0745231	1.03095	0.302563	0.504069
AP3M2	1357.3	0.332458	0.0778859	4.26853	1.96765e-05	0.000513782
AP3S1	1722.73	-0.291014	0.0820306	-3.54763	0.000388718	0.0060229
AP4B1	1114.49	0.15152	0.0912493	1.6605	0.0968131	0.256141
AP4E1	537.118	0.340261	0.148043	2.2984	0.0215392	0.108592
AP4M1	420.155	0.236213	0.0980839	2.40828	0.016028	0.0912118
AP4S1	230.539	-0.0860641	0.14487	-0.59408	0.552459	0.721798
AP5B1	1758.05	0.11331	0.0714644	1.58554	0.112843	0.280515
AP5M1	928.086	0.137398	0.116186	1.18258	0.236978	0.432145
AP5S1	858.285	0.228904	0.107051	2.13826	0.0324958	0.137858
AP5Z1	1261.56	0.231238	0.087348	2.64732	0.00811327	0.0574411
APBA2	978.08	-0.0616732	0.0913106	-0.675422	0.499407	0.681637
APBA3	578.168	0.0625243	0.104337	0.599254	0.549003	0.718763
APBB1	2372.73	-0.121045	0.0687809	-1.75986	0.0784313	0.227929
APBB2	708.352	0.17838	0.104068	1.71406	0.086517	0.239661
APBB3	508.467	0.0549422	0.147779	0.371787	0.710052	0.834489
APC	1058.7	0.172691	0.176068	0.98082	0.326682	0.528731
APEH	3597.84	-0.0694842	0.0849938	-0.81752	0.413631	0.606322
APEX1	11725.8	-0.212805	0.10212	-2.08387	0.0371724	0.14825
APEX2	2885.32	-0.0554946	0.0798187	-0.695259	0.486893	0.670405
APH1A	7543.72	-0.226693	0.0607157	-3.73367	0.000188708	0.00339737
APH1B	184.292	-0.0668528	0.126431	-0.52877	0.596965	0.754179
API5	5326.04	-0.0998125	0.0714981	-1.39602	0.16271	0.347389
APIP	1227.89	-0.180426	0.111582	-1.61699	0.105881	0.270509
APITD1	294.991	-0.185603	0.146875	-1.26367	0.206347	0.398861
APLP1	446.241	-0.259081	0.126605	-2.04637	0.0407201	0.155482
APLP2	13931.3	-0.190305	0.0758711	-2.50827	0.0121325	0.076024
APMAP	3532.46	-0.201887	0.0646409	-3.12321	0.00178888	0.0198267
APOA1BP	8312.96	-0.342737	0.129826	-2.63996	0.0082916	0.058214
APOBEC3C	578.197	-0.18078	0.143416	-1.26053	0.207478	0.399944
APOBEC3F	139.053	-0.199028	0.166975	-1.19196	0.233277	0.427616
APOC1	770.803	-0.23182	0.187136	-1.23878	0.215428	0.408609
APOL2	460.071	0.0791658	0.110228	0.718202	0.472633	0.657915
APOO	1126.8	-0.162855	0.129657	-1.25604	0.209102	0.401398
APOOL	833.898	-0.0978163	0.103571	-0.94444	0.344945	0.545118
APOPT1	757.673	-0.0628246	0.143442	-0.437979	0.661401	0.800722
APP	7888.51	-0.0856538	0.114208	-0.749977	0.453268	0.639088
APPBP2	1097.29	0.173556	0.119672	1.45027	0.146984	0.327029
APPL1	1418.97	-0.0126146	0.133769	-0.0943015	0.92487	0.964024
APPL2	707.95	-0.0901657	0.0991942	-0.908981	0.36336	0.562918
APRT	14204.7	-0.289304	0.149878	-1.93026	0.0535745	0.183412
APTR	417.588	0.130327	0.143049	0.911066	0.36226	0.562184
APTX	1900.41	-0.0708887	0.0962743	-0.73632	0.461536	0.647315
AQR	1180.17	0.191644	0.128798	1.48794	0.136767	0.31295
AR	532.721	0.107682	0.138777	0.775941	0.437784	0.62731
ARAF	3130.47	-0.191658	0.06782	-2.82598	0.00471368	0.0394355
ARAP1	2040.65	0.0861109	0.0983458	0.875593	0.381251	0.578747
ARC	173.593	0.985439	0.164151	6.00326	1.93398e-09	1.39974e-07
ARCN1	6899.08	-0.0488277	0.0808422	-0.603987	0.545852	0.716654
AREL1	1545	0.0373329	0.121817	0.306466	0.75925	0.867438
ARF1	28868	-0.245242	0.0745523	-3.28953	0.00100355	0.0128682
ARF3	7538.06	-0.238145	0.0502405	-4.7401	2.13613e-06	7.66963e-05
ARF4	5895.33	-0.192597	0.0632193	-3.04649	0.00231533	0.0237569
ARF5	6419.92	-0.287009	0.130033	-2.20719	0.0273005	0.124538
ARF6	3727.79	0.0595606	0.0584489	1.01902	0.308193	0.509513
ARFGAP1	4190.42	-0.00146122	0.0699365	-0.0208936	0.983331	0.992349
ARFGAP2	3961.44	-0.00388596	0.0814226	-0.0477258	0.961935	0.981875
ARFGAP3	1277.75	0.042352	0.075936	0.557733	0.577027	0.739297
ARFGEF1	737.24	0.33604	0.17478	1.92264	0.0545247	0.184962
ARFGEF2	1207.92	0.425573	0.223928	1.90049	0.0573687	0.190593
ARFIP1	797.647	0.0432691	0.165977	0.260694	0.794329	0.889516
ARFIP2	4560.7	-0.0821156	0.0888948	-0.923739	0.355622	0.555801
ARFRP1	1681.82	0.252367	0.113006	2.23323	0.0255339	0.119949
ARG2	1678.36	-0.155706	0.0834996	-1.86476	0.0622153	0.199444
ARGLU1	1283.81	0.0105132	0.0920823	0.114172	0.909102	0.955904
ARHGAP1	1832	-0.141718	0.0928787	-1.52584	0.127049	0.298897
ARHGAP10	562.169	0.175953	0.0866627	2.03032	0.0423242	0.15915
ARHGAP11A	1652.15	0.176584	0.141401	1.24882	0.211731	0.404555
ARHGAP12	470.18	0.193717	0.133669	1.44922	0.147276	0.327213
ARHGAP17	2411.62	-0.00861262	0.077186	-0.111583	0.911154	0.95685
ARHGAP18	290.136	0.192262	0.165761	1.15987	0.2461	0.441294
ARHGAP19	1315.96	0.101568	0.0731305	1.38887	0.164873	0.350205
ARHGAP21	1403.7	0.0743997	0.164603	0.451995	0.651273	0.79402
ARHGAP22	536.082	0.0370131	0.118001	0.313668	0.753773	0.864203
ARHGAP24	94.0527	0.595803	0.192828	3.08982	0.00200281	0.0214908
ARHGAP27	278.453	0.258592	0.111723	2.31458	0.0206359	0.106122
ARHGAP29	558.797	0.30178	0.211345	1.42791	0.153319	0.334963
ARHGAP33	330.844	0.0757124	0.112679	0.671929	0.501629	0.682515
ARHGAP35	1396.55	0.259929	0.192728	1.34868	0.177439	0.365241
ARHGAP39	599.1	0.336364	0.153576	2.19022	0.0285086	0.128231
ARHGAP44	417.153	0.194563	0.161217	1.20684	0.227493	0.422035
ARHGAP5	1323.62	0.133015	0.231222	0.575272	0.565107	0.731168
ARHGAP5-AS1	156.661	-0.147215	0.168663	-0.872834	0.382754	0.580568
ARHGDIA	18935.2	-0.251165	0.0919909	-2.73033	0.00632715	0.0485291
ARHGDIG	782.471	-0.354556	0.146202	-2.42512	0.0153033	0.0883936
ARHGEF1	1605.22	0.133162	0.0695463	1.91472	0.0555278	0.186964
ARHGEF10	539.478	0.199509	0.147711	1.35067	0.176802	0.364766
ARHGEF10L	151.972	0.229536	0.149487	1.53549	0.124663	0.295659
ARHGEF11	1682.53	-0.0172922	0.108046	-0.160045	0.872846	0.934084
ARHGEF12	2452.73	0.126826	0.198311	0.639531	0.522477	0.699872
ARHGEF16	162.527	0.0777038	0.174149	0.446192	0.655459	0.796806
ARHGEF17	326.255	0.225965	0.139022	1.62539	0.10408	0.268059
ARHGEF18	1269.15	0.134301	0.106506	1.26098	0.207316	0.399765
ARHGEF19	160.73	0.144712	0.160103	0.903866	0.366067	0.565811
ARHGEF2	1334.49	0.320452	0.103313	3.10175	0.00192377	0.0208712
ARHGEF25	871.42	0.00144261	0.0835202	0.0172726	0.986219	0.993961
ARHGEF26	1057.26	0.404589	0.131023	3.08793	0.00201556	0.0215528
ARHGEF3	362.505	0.510198	0.156454	3.26101	0.00111015	0.013792
ARHGEF39	1418.42	-0.0336755	0.0673413	-0.500072	0.617024	0.768714
ARHGEF4	481.828	0.12406	0.0988948	1.25447	0.209672	0.402059
ARHGEF40	419.974	0.192765	0.110937	1.7376	0.0822805	0.234033
ARHGEF6	355.443	-0.00740143	0.156093	-0.047417	0.962181	0.98194
ARHGEF7	638.041	0.150815	0.139713	1.07946	0.280383	0.48063
ARHGEF9	640.716	0.00149575	0.104927	0.0142551	0.988626	0.995122
ARID1A	2590.24	0.364966	0.178122	2.04896	0.0404659	0.155139
ARID1B	1515.59	0.288343	0.201948	1.42781	0.153347	0.334963
ARID2	775.168	0.368162	0.201704	1.82526	0.0679624	0.210363
ARID3A	304.181	0.00999607	0.187759	0.0532387	0.957542	0.978905
ARID3B	1450.53	0.0996214	0.0772665	1.28932	0.197286	0.388378
ARID4B	791.159	0.736771	0.21251	3.467	0.000526303	0.00776423
ARID5A	836.766	0.139593	0.0723758	1.92873	0.0537647	0.183787
ARIH1	2660.71	0.280617	0.080189	3.49945	0.000466225	0.00699272
ARIH2	5376.39	-0.0428418	0.0506268	-0.846228	0.397426	0.593853
ARL1	2123.11	-0.085782	0.0645061	-1.32983	0.183575	0.373101
ARL10	158.193	0.182985	0.301988	0.605934	0.544558	0.71554
ARL13B	274.067	0.378703	0.242565	1.56124	0.118467	0.288124
ARL14EP	834.443	0.341213	0.086074	3.96418	7.36485e-05	0.00158528
ARL15	292.487	0.104836	0.209134	0.501288	0.616169	0.768092
ARL16	1486.45	-0.113911	0.148805	-0.765501	0.443973	0.632138
ARL17A	288.512	0.118577	0.153583	0.772074	0.44007	0.628606
ARL2	4282.01	-0.380249	0.163385	-2.32732	0.0199482	0.104125
ARL2BP	2473.72	-0.189823	0.0679683	-2.79282	0.00522508	0.0422193
ARL3	1340.99	-0.234619	0.123421	-1.90096	0.0573069	0.190446
ARL4A	495.56	0.309094	0.117221	2.63684	0.00836818	0.058523
ARL4C	752.688	0.137857	0.0970558	1.42039	0.155495	0.337329
ARL4D	394.044	0.433207	0.143077	3.02779	0.00246352	0.0248751
ARL5A	1266.27	-0.109933	0.168108	-0.653942	0.513149	0.690603
ARL5B	243.439	0.617245	0.490131	1.25935	0.207905	0.400438
ARL6IP1	5447.33	-0.251861	0.083136	-3.0295	0.00244957	0.0248132
ARL6IP4	5600.63	-0.276385	0.127632	-2.16549	0.0303501	0.132702
ARL6IP5	2081.23	-0.234585	0.0706756	-3.31918	0.000902831	0.0117893
ARL6IP6	780.923	-0.177392	0.210446	-0.842934	0.399265	0.595474
ARL8A	701.933	-0.383846	0.103981	-3.69151	0.000222929	0.00389008
ARL8B	2228.52	0.0175158	0.0806324	0.21723	0.828029	0.908909
ARMC1	1346.65	0.0435753	0.108834	0.400384	0.688874	0.820592
ARMC10	714.582	-0.110761	0.105965	-1.04526	0.295903	0.497914
ARMC2	71.2819	0.160233	0.199221	0.804297	0.421225	0.613603
ARMC4	214.868	0.158483	0.150704	1.05162	0.292974	0.494356
ARMC5	1275.19	0.108301	0.0911452	1.18822	0.234746	0.429504
ARMC6	4567.48	-0.069165	0.0610154	-1.13357	0.256977	0.45378
ARMC7	886.569	0.240864	0.108111	2.22794	0.0258843	0.120949
ARMC8	992.975	0.177177	0.0839525	2.11045	0.0348199	0.142504
ARMC9	467.196	0.0919722	0.0972107	0.946112	0.344091	0.544491
ARMCX2	139.062	-0.106757	0.210395	-0.507411	0.611866	0.765472
ARMCX3	1247.96	0.0875922	0.0699419	1.25236	0.21044	0.403087
ARMCX5	653.294	0.125908	0.0967526	1.30134	0.193144	0.383655
ARMCX6	368.092	0.0738725	0.174635	0.423012	0.672287	0.808976
ARMT1	1398.74	-0.0218972	0.152449	-0.143636	0.885788	0.941721
ARNT	1621.15	0.137704	0.112322	1.22598	0.220205	0.414143
ARNTL	192.065	0.0963101	0.129649	0.74285	0.457572	0.643933
ARNTL2	513.214	-0.0598255	0.116952	-0.511538	0.608974	0.762924
ARPC1A	5792.84	-0.243373	0.0938661	-2.59277	0.00952058	0.0645243
ARPC1B	1736.99	-0.173403	0.0799126	-2.16991	0.030014	0.131734
ARPC2	7547.23	-0.196414	0.103591	-1.89605	0.0579537	0.191827
ARPC3	6298.89	-0.246542	0.135596	-1.81821	0.0690321	0.212287
ARPC4	3417.38	-0.255889	0.131937	-1.93948	0.052443	0.181497
ARPC5	4887.18	-0.273821	0.0872997	-3.13656	0.00170942	0.0192425
ARPC5L	2105.44	-0.107229	0.133031	-0.806044	0.420217	0.612907
ARPIN	704.788	-0.144529	0.119583	-1.20861	0.226814	0.421209
ARPP19	3120.81	-0.122435	0.0998549	-1.22613	0.220148	0.414108
ARRB1	662.696	-0.0426609	0.0876156	-0.486909	0.626323	0.776531
ARRB2	3352.5	-0.0626789	0.0873592	-0.717485	0.473075	0.658361
ARRDC1	1074.59	-0.139613	0.134918	-1.0348	0.300764	0.502128
ARRDC1-AS1	1339.27	-0.219051	0.120191	-1.82253	0.0683746	0.210973
ARRDC2	455.35	0.530371	0.133082	3.9853	6.73956e-05	0.00146827
ARRDC4	785.841	0.680555	0.149575	4.54993	5.36646e-06	0.00016726
ARSA	1160.97	-0.17012	0.105162	-1.61769	0.10573	0.270253
ARSB	499.28	-0.0799839	0.133319	-0.599942	0.548545	0.718515
ARSK	254.002	0.28301	0.176888	1.59995	0.109611	0.275663
ART5	379.081	-0.240855	0.145088	-1.66007	0.0969009	0.256311
ARV1	2359.15	-0.147871	0.0974153	-1.51794	0.129028	0.301581
ARVCF	337.673	0.394204	0.12862	3.06487	0.00217763	0.0226978
ASAH1	1268.64	-0.126282	0.0859916	-1.46854	0.141958	0.320462
ASAP1	1321.02	0.188642	0.158869	1.18741	0.235067	0.429706
ASAP2	289.495	0.174549	0.16006	1.09053	0.275481	0.474113
ASAP3	473.47	0.211263	0.133758	1.57945	0.114233	0.282673
ASB1	1066.94	0.121126	0.0815119	1.48599	0.137281	0.313541
ASB13	1446.77	-0.0514507	0.0673167	-0.764308	0.444684	0.632661
ASB16-AS1	562.026	-0.0709564	0.113428	-0.625561	0.531603	0.707188
ASB3	92.9451	0.0177042	0.190175	0.0930943	0.925829	0.964464
ASB6	2702.62	0.076862	0.0858193	0.895626	0.370453	0.569863
ASB7	571.814	0.261701	0.124315	2.10514	0.0352791	0.143674
ASB8	905.003	0.117322	0.0958054	1.22458	0.220732	0.414771
ASCC1	1209.81	-0.128742	0.0869992	-1.4798	0.138926	0.315538
ASCC2	3867.89	-0.0162896	0.0815403	-0.199773	0.841658	0.91725
ASCC3	1797.81	0.268543	0.152754	1.75801	0.0787454	0.22847
ASF1A	1549.52	-0.00268346	0.0722399	-0.0371465	0.970368	0.98684
ASF1B	3653.38	-0.160428	0.109658	-1.46298	0.143473	0.322005
ASH1L	1093.1	0.534741	0.248425	2.15253	0.031356	0.135176
ASH1L-AS1	246.795	-0.151639	0.14682	-1.03282	0.301687	0.503084
ASH2L	1667.77	0.0577271	0.0650381	0.887589	0.374762	0.572928
ASIC1	1870.21	-0.026138	0.0657158	-0.397742	0.69082	0.82173
ASL	875.061	-0.165985	0.139624	-1.1888	0.234518	0.429234
ASMTL	910.955	-0.0738421	0.103695	-0.712108	0.476398	0.660784
ASNA1	3542.73	-0.265562	0.120213	-2.20909	0.0271681	0.124144
ASNS	4450.09	-0.168117	0.067429	-2.49324	0.0126583	0.0782253
ASNSD1	3585.28	0.11759	0.0792093	1.48455	0.137664	0.313874
ASPH	1629.17	-0.0150269	0.124863	-0.120347	0.904208	0.953268
ASPHD1	201.198	-0.268862	0.18126	-1.4833	0.137996	0.314353
ASPHD2	338.145	0.0951832	0.141561	0.672381	0.501341	0.682462
ASPM	2576.29	0.0598972	0.123633	0.484476	0.628048	0.777691
ASPSCR1	1238.34	-0.133116	0.107935	-1.2333	0.217463	0.410993
ASRGL1	1688.46	-0.202747	0.0974648	-2.08021	0.0375061	0.148972
ASS1	1356.12	-0.200483	0.110835	-1.80884	0.0704756	0.214328
ASTE1	565.328	0.421792	0.103039	4.09353	4.2485e-05	0.00100916
ASTN2	181.846	0.185927	0.146953	1.26521	0.205797	0.398292
ASUN	2278.76	0.0892832	0.0762229	1.17134	0.241461	0.436585
ASXL1	3036.47	0.153678	0.100659	1.52672	0.126831	0.298601
ATAD1	1393.08	0.0766292	0.13393	0.57216	0.567214	0.732474
ATAD2	2020.19	0.405843	0.183094	2.21658	0.0266516	0.122827
ATAD2B	477.415	0.638694	0.172573	3.70101	0.000214747	0.00377171
ATAD3A	5673.13	-0.128465	0.0814839	-1.57656	0.114896	0.28329
ATAD3B	5020.43	0.0849525	0.0982804	0.864389	0.387374	0.585101
ATAD5	703.005	0.558681	0.178403	3.13157	0.00173877	0.0194713
ATAT1	604.897	0.000282715	0.13473	0.00209838	0.998326	0.99916
ATE1	686.811	0.169627	0.144626	1.17287	0.240847	0.436301
ATF1	657.531	0.141736	0.167244	0.84748	0.396728	0.593383
ATF2	866.102	0.282575	0.183118	1.54313	0.122799	0.293309
ATF3	1701.57	1.89746	0.123982	15.3043	7.1542e-53	1.92877e-49
ATF4	25788.2	0.1038	0.11202	0.926623	0.354123	0.5541
ATF5	1218.93	-0.157105	0.100591	-1.56182	0.11833	0.287923
ATF6	2023.7	-0.0576125	0.0708221	-0.813482	0.415942	0.608453
ATF6B	2323.31	-0.0409349	0.0843247	-0.485444	0.627362	0.777461
ATF7	1130.5	0.307179	0.132647	2.31577	0.0205709	0.105838
ATF7IP	1563.17	0.293871	0.119722	2.45462	0.0141033	0.0835201
ATG10	174.854	-0.138446	0.146338	-0.946068	0.344114	0.544491
ATG101	1736.54	0.150648	0.128509	1.17227	0.241089	0.436363
ATG12	1159.25	0.0297415	0.0815287	0.364798	0.715262	0.837501
ATG13	3397.53	-0.0505633	0.0664298	-0.761154	0.446565	0.634237
ATG14	588.247	0.164324	0.131994	1.24494	0.213155	0.406288
ATG16L1	1103.97	0.121024	0.0917597	1.31892	0.187197	0.377176
ATG16L2	262.067	0.0692251	0.138313	0.500497	0.616725	0.768519
ATG2A	1783.34	0.244205	0.113978	2.14256	0.0321483	0.137031
ATG2B	1024.51	0.150956	0.137428	1.09843	0.272016	0.470024
ATG3	2826.53	-0.108787	0.0981354	-1.10854	0.267628	0.46595
ATG4A	862.56	-0.159455	0.105641	-1.50941	0.131195	0.304718
ATG4B	2332.85	-0.0269219	0.0737953	-0.364818	0.715247	0.837501
ATG4C	682.325	0.0409218	0.0920939	0.444348	0.656791	0.797448
ATG4D	2233.42	-0.0943861	0.105816	-0.89198	0.372403	0.571428
ATG5	1240.76	-0.00460499	0.0720725	-0.0638938	0.949055	0.975752
ATG7	894.42	0.038598	0.0727629	0.530463	0.595791	0.753152
ATG9A	4553.54	-0.162611	0.0778706	-2.08822	0.0367777	0.147411
ATHL1	699.061	0.139941	0.142713	0.980578	0.326801	0.528844
ATIC	10021.5	-0.106348	0.0933709	-1.13899	0.254709	0.451032
ATL1	113.04	0.103743	0.198174	0.523492	0.600632	0.756949
ATL2	1971.5	0.0339498	0.0976106	0.347808	0.727984	0.84639
ATL3	1550.12	-0.101575	0.071093	-1.42877	0.153072	0.334731
ATM	1098.14	0.370029	0.187241	1.97622	0.0481304	0.171534
ATMIN	1887.8	-0.223793	0.0662109	-3.38001	0.000724839	0.00998087
ATN1	3188.98	-0.0185957	0.100644	-0.184767	0.853411	0.923901
ATOX1	3124.7	-0.372322	0.150776	-2.46937	0.0135352	0.081226
ATP10D	432.583	0.151763	0.159222	0.953151	0.340513	0.541212
ATP11B	1275.81	0.156568	0.152485	1.02678	0.304524	0.505456
ATP11C	2030.68	0.0452792	0.16239	0.27883	0.780375	0.879462
ATP13A1	4487.02	0.13868	0.0825714	1.67951	0.0930518	0.249801
ATP13A2	2416.86	-0.277285	0.0780789	-3.55134	0.000383276	0.00596428
ATP13A3	1913.39	0.0513739	0.256304	0.200441	0.841135	0.91725
ATP1A1	28749.5	-0.231188	0.0636321	-3.6332	0.000279928	0.00463709
ATP1A3	1040.17	-0.210095	0.079896	-2.6296	0.00854845	0.0594742
ATP1B1	721.568	-0.239879	0.12089	-1.98428	0.047225	0.169758
ATP1B2	270.103	-0.3235	0.154728	-2.09077	0.0365486	0.146959
ATP1B3	7775.11	-0.27503	0.107368	-2.56157	0.0104199	0.0686928
ATP2A1-AS1	808.518	-0.10729	0.18052	-0.59434	0.552285	0.721745
ATP2A2	9319.48	-0.151658	0.123619	-1.22682	0.219892	0.413842
ATP2A3	294.13	-0.0195454	0.122638	-0.159375	0.873374	0.934371
ATP2B1	1876.98	0.0758415	0.188901	0.401489	0.68806	0.820166
ATP2B4	1211.14	0.123987	0.138606	0.894524	0.371042	0.570313
ATP2C1	2068.01	-0.0809566	0.0890396	-0.909219	0.363234	0.562871
ATP5A1	19047.1	-0.187546	0.0899369	-2.0853	0.0370417	0.147893
ATP5B	50530.2	-0.209462	0.0875556	-2.39233	0.016742	0.0941322
ATP5C1	11070.7	-0.184021	0.124235	-1.48123	0.138547	0.314985
ATP5D	6522.66	-0.333887	0.157723	-2.11691	0.0342673	0.141789
ATP5E	4337.03	-0.341668	0.201921	-1.69209	0.090629	0.245971
ATP5F1	12890.4	-0.226095	0.0959325	-2.35682	0.0184323	0.0990401
ATP5G1	7271.77	-0.315938	0.171053	-1.84702	0.0647441	0.204212
ATP5G2	14287.1	-0.339856	0.179489	-1.89347	0.0582956	0.19284
ATP5G3	15949.7	-0.331875	0.129765	-2.55751	0.0105425	0.0691549
ATP5H	3830.28	-0.165784	0.161262	-1.02804	0.303931	0.505105
ATP5I	5448.31	-0.243406	0.159685	-1.52428	0.127438	0.299236
ATP5J	5715.82	-0.256782	0.157238	-1.63308	0.102453	0.265909
ATP5J2	9221.67	-0.376895	0.15633	-2.41089	0.0159137	0.0907047
ATP5L	8167.8	-0.226184	0.145624	-1.55321	0.120374	0.290535
ATP5O	10238.7	-0.257031	0.138718	-1.8529	0.0638961	0.203081
ATP5S	393.338	-0.0111955	0.144323	-0.0775727	0.938168	0.970289
ATP5SL	2135.69	-0.172896	0.0956538	-1.80752	0.070681	0.214699
ATP6AP1	8393.98	-0.225352	0.0781598	-2.88322	0.0039363	0.0343996
ATP6AP2	3405.77	-0.244644	0.0806338	-3.03402	0.00241319	0.0245972
ATP6V0A1	3652.12	-0.0885624	0.0611891	-1.44736	0.147797	0.327885
ATP6V0A2	1274.26	-0.0377588	0.138758	-0.27212	0.78553	0.883885
ATP6V0B	6699.4	-0.285601	0.128822	-2.21703	0.0266213	0.122827
ATP6V0C	8465.58	-0.326031	0.123281	-2.64462	0.00817832	0.0577439
ATP6V0D1	4520.53	-0.226059	0.0993885	-2.2745	0.0229359	0.112993
ATP6V0E1	3665.01	-0.353466	0.119731	-2.95217	0.00315553	0.029602
ATP6V0E2	5868.76	-0.297656	0.116311	-2.55914	0.0104933	0.0689575
ATP6V0E2-AS1	242.946	0.219732	0.129867	1.69198	0.0906503	0.245971
ATP6V1A	2806.91	-0.0169582	0.0953488	-0.177855	0.858837	0.926477
ATP6V1B1-AS1	173.805	-0.0373555	0.17221	-0.216919	0.828272	0.908933
ATP6V1B2	2612.19	-0.0462902	0.060346	-0.76708	0.443034	0.6313
ATP6V1C1	2129.61	-0.0852031	0.0876197	-0.97242	0.330842	0.532428
ATP6V1D	1911.66	-0.142834	0.125326	-1.1397	0.254412	0.451007
ATP6V1E1	4789.79	-0.185096	0.117042	-1.58145	0.113775	0.281929
ATP6V1F	8049.62	-0.353007	0.14749	-2.39344	0.0166914	0.0939459
ATP6V1G1	4133.79	-0.207986	0.0784581	-2.65092	0.00802725	0.0569887
ATP6V1H	1389.24	-0.0564989	0.0794217	-0.711379	0.476849	0.66097
ATP7B	686.597	0.0243202	0.184449	0.131854	0.8951	0.947557
ATP8B2	2806.59	0.0319105	0.143186	0.222861	0.823644	0.905975
ATP9A	910.991	-0.0268967	0.157618	-0.170645	0.864503	0.929504
ATP9B	256.713	0.203556	0.151184	1.34641	0.178169	0.365698
ATPAF1	2695.3	-0.111491	0.0801347	-1.3913	0.164136	0.34912
ATPAF2	774.894	-0.129902	0.111042	-1.16985	0.242062	0.437252
ATPIF1	7803.37	-0.269416	0.149383	-1.80353	0.0713046	0.215875
ATR	1063.26	0.452578	0.156925	2.88404	0.00392608	0.0343464
ATRAID	3066.18	-0.291977	0.121057	-2.4119	0.0158698	0.0905981
ATRIP	1274.42	0.245898	0.0914771	2.68808	0.00718639	0.0527198
ATRN	1228.9	0.0222349	0.115216	0.192985	0.846971	0.919679
ATRNL1	175.911	-0.158561	0.168262	-0.942345	0.346016	0.546251
ATRX	809.761	0.318494	0.237211	1.34266	0.179381	0.367276
ATXN1	376.253	0.24736	0.140345	1.76251	0.077983	0.227289
ATXN10	5927.21	-0.151798	0.0772292	-1.96555	0.0493509	0.174149
ATXN1L	1142.07	0.146484	0.169433	0.864554	0.387284	0.585101
ATXN2	1459.07	0.439599	0.12193	3.60534	0.000311741	0.00505536
ATXN2L	6376.81	0.214216	0.0701691	3.05286	0.00226675	0.023392
ATXN3	381.213	0.0711868	0.107009	0.665242	0.505896	0.68503
ATXN7L1	151.331	0.594452	0.159412	3.72904	0.000192212	0.00344893
ATXN7L2	956.499	0.33162	0.106099	3.12557	0.00177463	0.0197499
ATXN7L3	2231.77	-0.0348433	0.114265	-0.304934	0.760416	0.868145
ATXN7L3B	3808.81	-0.0269671	0.100534	-0.268238	0.788516	0.885416
AUH	381.035	0.0236516	0.118038	0.200372	0.841189	0.91725
AUNIP	1012.09	0.433787	0.120312	3.60553	0.000311519	0.00505536
AUP1	7759.77	-0.147949	0.114508	-1.29205	0.196341	0.387153
AURKA	3554.48	0.00144082	0.0851119	0.0169285	0.986494	0.994145
AURKAIP1	8252.18	-0.329118	0.146948	-2.23969	0.0251113	0.118616
AURKB	7054.58	-0.149225	0.133958	-1.11397	0.265292	0.463605
AUTS2	1244.47	0.212076	0.116591	1.81897	0.0689153	0.212169
AVEN	415.444	-0.171271	0.127791	-1.34024	0.180168	0.368537
AVL9	1022.93	0.335081	0.160949	2.08191	0.0373511	0.148523
AVPI1	560.381	0.0589183	0.11405	0.516598	0.605437	0.760488
AXIN1	1846.88	0.0478301	0.0881831	0.542395	0.587546	0.747818
AZI2	1270.69	0.0490652	0.0777787	0.630832	0.528151	0.704192
AZIN1	2712.96	0.191711	0.0963248	1.99025	0.0465629	0.168332
AZIN2	123.455	0.00797063	0.176176	0.0452424	0.963914	0.982753
B2M	6380.4	-0.286773	0.1021	-2.80875	0.00497338	0.0407855
B3GALNT1	97.4912	-0.121321	0.181491	-0.66847	0.503834	0.683784
B3GALNT2	1464.55	0.145898	0.0865894	1.68494	0.0920007	0.248065
B3GALT6	1846.54	-0.125296	0.131478	-0.952982	0.340599	0.541212
B3GAT3	2750.15	-0.302224	0.127951	-2.36202	0.0181755	0.0982482
B3GLCT	755.131	-0.0919018	0.103903	-0.884499	0.376427	0.574429
B3GNT2	333.272	0.11644	0.172882	0.673521	0.500616	0.682049
B3GNT4	132.359	-0.198904	0.223212	-0.891102	0.372874	0.571596
B3GNT5	360.086	0.0585563	0.166803	0.35105	0.725551	0.845086
B3GNTL1	119.019	0.0328187	0.208991	0.157034	0.875218	0.935405
B4GALNT1	242.382	-0.0197293	0.141351	-0.139576	0.888995	0.943966
B4GALNT3	324.429	0.307385	0.325076	0.945579	0.344363	0.544678
B4GALNT4	132.517	0.106026	0.161436	0.656769	0.511329	0.68924
B4GALT1	1280.77	-0.069883	0.084745	-0.824627	0.409583	0.602921
B4GALT2	2999.25	-0.219023	0.0997042	-2.19673	0.02804	0.126839
B4GALT3	3572.44	-0.161959	0.0710723	-2.27879	0.0226797	0.112007
B4GALT4	646.975	0.121537	0.0942426	1.28961	0.197185	0.38825
B4GALT5	1102.55	-0.151202	0.120828	-1.25138	0.210796	0.403465
B4GALT6	745.071	-0.0551975	0.211308	-0.261219	0.793924	0.889227
B4GALT7	1986.88	-0.0914752	0.117325	-0.779673	0.435584	0.625091
B4GAT1	3724.79	-0.2825	0.0837912	-3.37147	0.000747677	0.0102063
B9D1	1668.94	-0.198387	0.122203	-1.62342	0.104499	0.268697
B9D2	216.962	-0.197691	0.136495	-1.44834	0.147523	0.327477
BABAM1	4290.34	-0.190189	0.0968952	-1.96283	0.0496657	0.174928
BACE1	673.205	-0.0679737	0.0949965	-0.715539	0.474276	0.659212
BACE2	1302.72	-0.111665	0.0715535	-1.56058	0.118623	0.288198
BACH1	513.111	0.378557	0.204641	1.84987	0.064333	0.203702
BAD	1468.99	-0.268894	0.141639	-1.89845	0.0576368	0.191248
BAG1	2751.23	-0.112894	0.100277	-1.12582	0.260241	0.457597
BAG2	1068.83	0.0943461	0.089939	1.049	0.294178	0.495986
BAG3	1882.35	0.218499	0.064969	3.36312	0.000770666	0.0103886
BAG4	1387.17	0.15048	0.138954	1.08294	0.278833	0.47866
BAG5	1831.18	0.187003	0.097438	1.9192	0.0549593	0.18601
BAG6	9921.14	-0.110782	0.0713978	-1.55162	0.120753	0.290995
BAHCC1	1303.92	0.19077	0.130365	1.46335	0.143372	0.322005
BAHD1	1379.6	0.203098	0.124527	1.63096	0.102899	0.266524
BAIAP2	1264.66	0.111886	0.119704	0.934693	0.349947	0.549639
BAIAP2-AS1	294.001	0.0595444	0.145794	0.408416	0.682968	0.816352
BAIAP2L1	1353.22	-0.00442386	0.081661	-0.0541734	0.956797	0.978761
BAIAP3	106.507	0.670812	0.164281	4.08332	4.43977e-05	0.00104538
BAK1	1608.42	0.00548231	0.110801	0.0494788	0.960538	0.980634
BAMBI	1238.45	0.60124	0.117657	5.11012	3.21954e-07	1.39436e-05
BANF1	5098.77	-0.337417	0.182355	-1.85032	0.0642667	0.203702
BANP	616.636	0.553484	0.103288	5.35866	8.38425e-08	4.10981e-06
BAP1	5457.66	-0.105236	0.065474	-1.6073	0.107989	0.273306
BARD1	553.462	0.875512	0.181112	4.83408	1.33763e-06	5.11525e-05
BARX1	556.64	-0.327176	0.174819	-1.87151	0.0612743	0.198076
BARX2	640.06	-0.0516754	0.101517	-0.509032	0.61073	0.764582
BASP1	532.811	-0.0490795	0.106318	-0.461629	0.644348	0.789798
BATF3	366.669	-0.155046	0.181178	-0.855766	0.392127	0.589696
BAX	3778.89	-0.241819	0.133837	-1.80681	0.0707915	0.214856
BAZ1A	2804.02	0.335615	0.153011	2.1934	0.0282785	0.127597
BAZ1B	3866.8	0.294625	0.140991	2.08968	0.036647	0.147188
BAZ2A	2730.72	0.213955	0.197853	1.08139	0.279526	0.479543
BBC3	322.316	0.138652	0.149357	0.928324	0.353239	0.55328
BBIP1	474.883	-0.204428	0.109584	-1.8655	0.0621119	0.199369
BBS1	757.911	0.158292	0.090041	1.75799	0.0787484	0.22847
BBS10	417.172	0.214942	0.187493	1.1464	0.251629	0.447561
BBS12	174.823	0.407453	0.148793	2.73839	0.00617415	0.047643
BBS2	995.3	0.083277	0.0759508	1.09646	0.272878	0.471211
BBS4	993.725	0.0401778	0.0764216	0.525738	0.59907	0.755832
BBS5	271.764	0.235602	0.114909	2.05034	0.0403311	0.154997
BBS7	909.492	0.112223	0.0974734	1.15132	0.249602	0.445279
BBS9	385.352	-0.0405045	0.115394	-0.351011	0.72558	0.845086
BBX	1124.79	0.269146	0.176494	1.52495	0.127271	0.299086
BCAM	578.883	-0.0607975	0.0948685	-0.640861	0.521613	0.698941
BCAP29	893.455	-0.0486393	0.114672	-0.424159	0.67145	0.808608
BCAP31	17370	-0.328195	0.132094	-2.48456	0.0129711	0.0789902
BCAR1	1906.7	0.0868529	0.099	0.877302	0.380323	0.577792
BCAR3	178.634	0.24313	0.151511	1.60469	0.108561	0.274182
BCAS2	3137.27	-0.0677639	0.0958087	-0.707283	0.479391	0.663012
BCAS3	1025.91	0.0218676	0.0911607	0.23988	0.810424	0.898101
BCAS4	357.042	-0.250915	0.138397	-1.81301	0.0698297	0.213085
BCAT1	2239.67	-0.0890983	0.101883	-0.874513	0.381839	0.579476
BCAT2	2613.84	-0.140748	0.116656	-1.20652	0.227618	0.42212
BCCIP	6365.9	-0.175407	0.104516	-1.67829	0.0932911	0.250075
BCDIN3D	438.76	0.522728	0.138462	3.77526	0.000159842	0.00296684
BCHE	125.585	-0.209121	0.179115	-1.16752	0.243	0.437975
BCKDHA	1535.75	-0.125755	0.0959601	-1.31049	0.190031	0.380203
BCKDHB	582.223	-0.12909	0.108115	-1.19401	0.232473	0.426951
BCKDK	4366.07	-0.221357	0.112038	-1.97573	0.0481855	0.171609
BCL10	453.229	0.331955	0.123908	2.67905	0.0073832	0.0535939
BCL11A	534.381	0.314723	0.140403	2.24157	0.0249891	0.118454
BCL2L1	987.547	0.0031041	0.0734293	0.0422733	0.966281	0.98431
BCL2L11	1147.81	0.142498	0.0895606	1.59108	0.111591	0.278664
BCL2L12	3282.81	-0.249192	0.112217	-2.22062	0.0263768	0.122185
BCL2L13	1922.11	0.0407395	0.0788331	0.516782	0.605308	0.760443
BCL2L2	529.959	0.0105839	0.132	0.0801811	0.936093	0.969166
BCL6B	466.14	0.127946	0.10018	1.27716	0.201544	0.393265
BCL7A	1491.56	0.00995119	0.107865	0.0922557	0.926495	0.964879
BCL7B	2064.14	0.0555434	0.0906221	0.612912	0.539934	0.712363
BCL7C	3404.55	-0.380326	0.153919	-2.47096	0.0134751	0.0811367
BCL9	1395.44	0.165662	0.126793	1.30656	0.191364	0.381383
BCL9L	548.589	0.0719867	0.115701	0.622177	0.533825	0.708392
BCLAF1	10174.1	0.046176	0.0881074	0.524087	0.600218	0.756516
BCOR	5469.48	0.458202	0.206489	2.21902	0.0264856	0.122426
BCORL1	1295.29	0.299576	0.132757	2.25657	0.0240349	0.116178
BCR	4014.63	0.0516189	0.0919302	0.561501	0.574456	0.737844
BCRP2	69.3448	0.0954936	0.271369	0.351896	0.724916	0.84477
BCS1L	3599.67	-0.179886	0.135988	-1.3228	0.1859	0.375421
BDH1	125.414	-0.0405545	0.183235	-0.221325	0.82484	0.906745
BDH2	1051.58	-0.211269	0.112154	-1.88374	0.0596002	0.195089
BDP1	1030.37	0.367396	0.172361	2.13155	0.0330442	0.139004
BECN1	1687.54	-0.0143491	0.0793481	-0.180838	0.856495	0.925124
BEND3	649.533	0.362158	0.134837	2.68589	0.00723379	0.0529085
BEND4	648.851	0.261046	0.172674	1.51179	0.130588	0.303964
BEND7	256.171	0.0740025	0.13737	0.538708	0.590088	0.749707
BET1	807.72	0.0166655	0.105968	0.157269	0.875033	0.935404
BET1L	2189.77	0.163075	0.0735726	2.21652	0.026656	0.122827
BEX1	1083.03	-0.231827	0.112799	-2.05522	0.0398582	0.153841
BEX2	2212.08	-0.180926	0.127576	-1.41818	0.156139	0.337802
BEX4	3129.4	-0.173827	0.0981722	-1.77064	0.0766214	0.224839
BEX5	337.916	-0.194541	0.149141	-1.30441	0.192094	0.382556
BFAR	1741.77	0.136057	0.0727545	1.87008	0.0614721	0.198189
BFSP1	191.963	-0.0238454	0.127689	-0.186746	0.85186	0.922798
BHLHB9	556.986	0.116325	0.109011	1.0671	0.285928	0.487194
BHLHE40	589.673	0.682471	0.127098	5.36964	7.88937e-08	3.90271e-06
BICD2	1475.97	-0.0674501	0.12036	-0.560404	0.575204	0.738189
BID	1479.93	-0.172025	0.0979425	-1.75638	0.0790228	0.22877
BIN1	1214.29	-0.13996	0.0881066	-1.58853	0.112167	0.279483
BIN3	723.656	0.181514	0.104922	1.72999	0.0836316	0.235663
BIRC2	839.164	0.181865	0.110577	1.64469	0.100034	0.261899
BIRC5	8432.33	-0.19291	0.0875371	-2.20376	0.0275415	0.125214
BIRC6	2006.91	0.276511	0.212028	1.30412	0.192192	0.382611
BIVM	287.158	0.0511708	0.131295	0.38974	0.696728	0.825571
BLCAP	2080.98	-0.234163	0.0738909	-3.16903	0.00152948	0.0177928
BLM	1680.52	0.442595	0.0821482	5.38776	7.13423e-08	3.56183e-06
BLMH	4295.94	-0.0640841	0.0953663	-0.671978	0.501597	0.682515
BLOC1S1	1879.57	-0.448043	0.160959	-2.78359	0.0053761	0.0430727
BLOC1S2	1464.25	-0.00347918	0.0824194	-0.0422131	0.966329	0.98431
BLOC1S3	1026.05	0.174999	0.134916	1.29709	0.194599	0.38541
BLOC1S4	1076.62	-0.120647	0.124933	-0.965695	0.334197	0.535863
BLOC1S6	1032.78	-0.0266702	0.107463	-0.24818	0.803995	0.894766
BLVRA	1415.07	-0.220931	0.145361	-1.51987	0.128543	0.300891
BLVRB	1163.99	-0.333106	0.111279	-2.99342	0.00275868	0.0268909
BLZF1	355.836	0.377191	0.171345	2.20135	0.0277115	0.125801
BMF	206.326	0.114791	0.159368	0.720288	0.471348	0.656954
BMP1	623.877	0.0376563	0.0962126	0.391387	0.695511	0.825101
BMP2	1242.73	0.623956	0.106029	5.88475	3.9865e-09	2.7038e-07
BMP2K	402.387	0.111672	0.162232	0.688351	0.491232	0.673462
BMP4	448.444	0.0412177	0.115595	0.356571	0.721413	0.842326
BMP6	282.717	-0.135211	0.112995	-1.19661	0.231457	0.425906
BMP7	1989.87	-0.199543	0.0878007	-2.27268	0.0230457	0.113206
BMPR1A	422.234	0.0243737	0.150976	0.161441	0.871746	0.933093
BMPR1B	158.659	0.0043769	0.156156	0.028029	0.977639	0.989847
BMPR2	1334.62	0.0935276	0.138468	0.675446	0.499392	0.681637
BMS1	4344.2	0.147954	0.0860092	1.72021	0.0853935	0.238447
BMS1P20	410.947	0.190199	0.130862	1.45343	0.146105	0.326096
BNIP1	1229.48	0.207682	0.113325	1.83262	0.0668589	0.208628
BNIP2	777.378	-0.0521338	0.12253	-0.425477	0.670489	0.808064
BNIP3	1342.55	-0.147754	0.0859913	-1.71825	0.0857518	0.238794
BNIP3L	979.223	-0.213639	0.0808763	-2.64156	0.00825257	0.0580155
BOC	355.739	-0.047972	0.0947634	-0.506229	0.612696	0.766065
BOD1	4035.15	-0.0977952	0.0914494	-1.06939	0.284893	0.486199
BOLA1	763.389	-0.149789	0.137051	-1.09294	0.274419	0.472698
BOLA3	2719.44	-0.206331	0.13104	-1.57457	0.115355	0.283978
BOLA3-AS1	370.627	-0.0305473	0.0951133	-0.321168	0.748083	0.860607
BOP1	9303.84	-0.120709	0.0655014	-1.84285	0.0653514	0.205766
BORA	1524.49	0.293271	0.0626926	4.67793	2.89791e-06	0.000101136
BPGM	1440.82	0.0118968	0.0929347	0.128012	0.898139	0.949935
BPHL	602.9	-0.264848	0.133912	-1.97778	0.0479541	0.171351
BPNT1	1656.72	-0.150566	0.116975	-1.28716	0.198037	0.389005
BPTF	2290.61	0.334941	0.132329	2.53111	0.0113701	0.0723819
BRAF	229.134	0.204087	0.231591	0.881239	0.378188	0.576237
BRAP	1117.98	0.359583	0.0723901	4.9673	6.78928e-07	2.72177e-05
BRAT1	3378.8	-0.0194508	0.0723828	-0.268722	0.788144	0.885348
BRCA1	1492.65	0.25836	0.147086	1.75653	0.0789986	0.22877
BRCC3	1413.9	-0.0247741	0.0972806	-0.254667	0.798981	0.891947
BRD1	1549.48	0.621336	0.135581	4.58277	4.58855e-06	0.000146834
BRD2	20008.7	0.763904	0.122405	6.24077	4.35415e-10	3.61194e-08
BRD3	1493.37	0.0926976	0.113607	0.815953	0.414527	0.60696
BRD4	2581.55	0.191862	0.144527	1.32752	0.184338	0.373877
BRD7	2597.09	-0.0781236	0.109237	-0.715175	0.474501	0.659292
BRD8	3122.54	0.201486	0.0597994	3.36936	0.000753429	0.0102357
BRD9	1747.8	0.257952	0.0787145	3.27706	0.00104892	0.0132917
BRE	2047.32	-0.203857	0.105366	-1.93475	0.0530209	0.182544
BRF1	1801.16	0.118563	0.0837807	1.41516	0.157021	0.339138
BRF2	879.697	1.06351	0.0953388	11.1551	6.76382e-29	6.07842e-26
BRI3	1901.52	-0.380435	0.17394	-2.18716	0.0287307	0.128775
BRI3BP	636.441	-0.129863	0.0850361	-1.52715	0.126723	0.298597
BRINP3	111.63	0.107227	0.196953	0.544431	0.586145	0.747199
BRIP1	745.55	0.314494	0.148783	2.11377	0.0345348	0.142146
BRIX1	2907.12	0.0421576	0.099159	0.425151	0.670727	0.80826
BRK1	4939.31	-0.222385	0.123998	-1.79346	0.0729002	0.218619
BRMS1	3479.55	-0.256918	0.124423	-2.06488	0.0389346	0.15182
BRMS1L	984.491	-0.135094	0.100581	-1.34314	0.179227	0.367071
BROX	1499.91	-0.00907269	0.106965	-0.0848193	0.932405	0.967523
BRPF1	1940.17	0.492087	0.114142	4.31118	1.62384e-05	0.000434075
BRPF3	2244.54	0.341569	0.157089	2.17437	0.0296776	0.130897
BRSK1	124.113	0.332815	0.169449	1.9641	0.0495186	0.174612
BRSK2	729.056	0.33842	0.116168	2.91319	0.00357757	0.032258
BRWD1	780.911	0.165964	0.138949	1.19443	0.23231	0.426859
BRWD3	670.32	0.0772753	0.213072	0.362672	0.71685	0.83857
BSDC1	1642.02	0.0805953	0.129439	0.622652	0.533513	0.708373
BSG	24619	-0.290436	0.0961434	-3.02086	0.00252061	0.0253158
BTAF1	1504.18	0.310126	0.205068	1.51231	0.130454	0.303848
BTBD1	3294.59	0.0206532	0.104573	0.1975	0.843436	0.918192
BTBD10	820.522	0.0639081	0.0841793	0.75919	0.447739	0.634693
BTBD11	528.173	0.0223864	0.0916015	0.244388	0.80693	0.896505
BTBD2	3597.36	-0.19037	0.0678933	-2.80396	0.00504786	0.0412082
BTBD3	1309.44	0.0948691	0.140104	0.677133	0.498322	0.680473
BTBD6	2710.56	-0.158962	0.108356	-1.46703	0.142368	0.321003
BTBD7	947.86	0.194806	0.14366	1.35602	0.175093	0.362492
BTBD9	356.72	0.122593	0.15634	0.784143	0.432956	0.623032
BTD	481.952	-0.268675	0.125263	-2.14488	0.0319622	0.136648
BTF3	23977.7	-0.196501	0.150298	-1.30741	0.191075	0.381019
BTF3L4	2218.57	-0.079732	0.0952582	-0.837009	0.402588	0.598181
BTG1	2045.38	0.581615	0.0743564	7.822	5.19923e-15	1.03831e-12
BTG2	612.573	0.301136	0.11739	2.56526	0.0103099	0.0682519
BTG3	645.72	-0.104554	0.137569	-0.76001	0.447249	0.634693
BTN2A1	1233.51	0.370409	0.0919255	4.02944	5.59091e-05	0.00126135
BTN2A2	600.594	0.196507	0.0999174	1.96669	0.049219	0.174123
BTN3A2	572.34	-0.0240689	0.120505	-0.199733	0.841689	0.91725
BTRC	1183.98	-0.0724512	0.094035	-0.770471	0.441021	0.629513
BUB1	3138	0.112954	0.0984214	1.14766	0.25111	0.446988
BUB1B	2279.23	0.210007	0.100922	2.08089	0.0374444	0.148839
BUB3	7912.78	-0.159145	0.0719633	-2.21148	0.0270029	0.123862
BUD13	852.863	0.497324	0.0985154	5.04819	4.46022e-07	1.87156e-05
BUD31	2381.37	-0.135616	0.138123	-0.98185	0.326174	0.528413
BVES	389.922	0.131465	0.119332	1.10168	0.2706	0.46888
BYSL	4293.01	0.124068	0.0861419	1.44028	0.149789	0.331077
BZW1	3103.86	-0.166949	0.0987275	-1.691	0.0908361	0.246187
BZW2	4511.77	-0.123721	0.103406	-1.19646	0.231515	0.425906
C10orf10	368.477	1.61062	0.11898	13.5368	9.47729e-42	2.04406e-38
C10orf2	2993.39	0.37591	0.0766568	4.9038	9.39987e-07	3.69957e-05
C10orf32	443.859	0.152289	0.131032	1.16223	0.245144	0.440385
C10orf35	430.6	0.0710922	0.129076	0.550777	0.581787	0.743452
C10orf76	895.218	0.221289	0.0754724	2.93205	0.00336728	0.030852
C10orf88	363.559	0.513133	0.143	3.58835	0.000332783	0.00531664
C11orf1	391.942	-0.244125	0.127045	-1.92156	0.054661	0.185366
C11orf24	2320.85	-0.0467314	0.0936396	-0.499056	0.61774	0.769161
C11orf30	491.182	0.427398	0.167857	2.5462	0.0108901	0.0704917
C11orf31	3903.89	-0.283204	0.165314	-1.71312	0.0866896	0.23972
C11orf45	98.9593	0.311216	0.18275	1.70296	0.0885753	0.242805
C11orf49	922.88	-0.0923061	0.108855	-0.847974	0.396452	0.593154
C11orf54	294.537	-0.0443239	0.118946	-0.372639	0.709417	0.833917
C11orf57	1652.55	0.0894485	0.065768	1.36006	0.173811	0.360943
C11orf58	5171.95	-0.163176	0.0625034	-2.61068	0.00903625	0.0620681
C11orf68	1400.62	-0.0822027	0.103214	-0.796433	0.42578	0.617307
C11orf71	328.431	-0.196335	0.148153	-1.32522	0.185098	0.374432
C11orf73	1703.73	-0.297013	0.125055	-2.37507	0.0175457	0.0962428
C11orf74	725.343	-0.269162	0.142575	-1.88787	0.059044	0.193889
C11orf80	210.494	-0.209064	0.123624	-1.69114	0.0908109	0.24618
C11orf84	1891.1	-0.102328	0.0650663	-1.57267	0.115795	0.284579
C11orf95	1591.07	-0.0667463	0.0924995	-0.721585	0.470549	0.656201
C11orf98	337.554	-0.257966	0.222179	-1.16108	0.245611	0.441003
C12orf10	2734.86	-0.194267	0.140136	-1.38627	0.165664	0.350973
C12orf29	1200.32	0.0353783	0.0782058	0.452375	0.650999	0.79398
C12orf4	1167.01	0.0862112	0.0783626	1.10016	0.271264	0.469401
C12orf43	1403.27	0.0774511	0.0775819	0.998314	0.318127	0.520115
C12orf45	964.59	-0.0894015	0.163634	-0.546349	0.584826	0.746009
C12orf49	1837.77	-0.0816632	0.10781	-0.757473	0.448767	0.635355
C12orf57	1212.2	-0.129291	0.184341	-0.701366	0.483074	0.666621
C12orf65	481.768	0.328015	0.165832	1.97799	0.0479296	0.171351
C12orf66	335.22	0.311805	0.103128	3.02347	0.00249894	0.0251386
C12orf73	557.335	-0.0267242	0.118272	-0.225954	0.821237	0.904804
C12orf75	1084.59	-0.250759	0.102985	-2.43491	0.0148955	0.0865945
C12orf76	225.727	0.02881	0.130057	0.221518	0.824689	0.906745
C14orf1	2231.28	-0.256528	0.100961	-2.54088	0.0110574	0.0711051
C14orf119	3226.69	-0.0974806	0.148054	-0.658411	0.510274	0.6887
C14orf132	569.152	0.0723606	0.101773	0.711003	0.477082	0.661127
C14orf142	506.474	-0.021126	0.144126	-0.14658	0.883463	0.94086
C14orf159	404.682	-0.0390151	0.110243	-0.353901	0.723413	0.843564
C14orf166	6470.78	-0.167996	0.1313	-1.27948	0.200727	0.39236
C14orf169	156.793	0.0152087	0.135464	0.112271	0.910609	0.956544
C14orf2	5585.16	-0.245632	0.158836	-1.54645	0.121996	0.292421
C14orf37	166.737	0.0054551	0.170676	0.0319618	0.974503	0.988856
C14orf79	352.48	0.291167	0.140429	2.0734	0.0381346	0.150089
C14orf80	1547.78	0.0292067	0.100844	0.289624	0.772104	0.874619
C14orf93	310.425	0.143363	0.146219	0.980468	0.326855	0.528853
C15orf27	177.159	-0.0135026	0.143082	-0.0943695	0.924816	0.964024
C15orf39	4741.75	0.497265	0.0803213	6.19095	5.98022e-10	4.67324e-08
C15orf40	786.848	-0.00361092	0.141075	-0.0255958	0.97958	0.990633
C15orf41	360.515	0.0952488	0.122898	0.775022	0.438326	0.627577
C15orf57	469.176	0.0748386	0.120793	0.619562	0.535546	0.7091
C15orf59	521.129	-0.243694	0.160459	-1.51873	0.12883	0.301322
C15orf61	524.7	-0.186777	0.148304	-1.25942	0.207879	0.400438
C16orf13	3478.64	-0.185354	0.157244	-1.17877	0.238491	0.433635
C16orf58	1866.9	-0.16918	0.101054	-1.67414	0.0941026	0.251669
C16orf59	1711.93	0.0527815	0.0821843	0.642233	0.520722	0.698006
C16orf62	1353.12	0.0593866	0.0839719	0.70722	0.47943	0.663012
C16orf70	998.951	-0.100627	0.0875174	-1.1498	0.250228	0.446099
C16orf72	1273.58	0.364991	0.111709	3.26733	0.00108567	0.013598
C16orf74	355.065	-0.0864392	0.136138	-0.634938	0.525469	0.702362
C16orf87	470.512	0.174863	0.133703	1.30785	0.190925	0.380904
C16orf91	1484.96	0.0459643	0.129646	0.354537	0.722937	0.843192
C16orf93	609.315	-0.063459	0.125426	-0.505949	0.612893	0.766125
C16orf95	330.37	-0.180734	0.179272	-1.00816	0.313379	0.514929
C17orf100	90.4154	0.194345	0.222155	0.874817	0.381674	0.579306
C17orf49	284.451	-0.486313	0.22714	-2.14103	0.0322719	0.137333
C17orf51	2245.6	0.27813	0.0898557	3.09529	0.0019662	0.0211952
C17orf53	1035.01	0.56478	0.103935	5.43398	5.51123e-08	2.79029e-06
C17orf58	566.058	-0.000379564	0.105377	-0.00360197	0.997126	0.9987
C17orf59	646.529	0.214102	0.115871	1.84777	0.0646357	0.20393
C17orf62	1668.49	-0.12333	0.104454	-1.18071	0.237719	0.432814
C17orf75	948.696	-0.0788335	0.0821137	-0.960054	0.337028	0.538372
C17orf80	1301.79	0.274145	0.0952375	2.87854	0.00399518	0.0348013
C17orf85	2211.11	0.142404	0.105449	1.35045	0.176871	0.364838
C17orf89	2196.26	-0.224695	0.164432	-1.36649	0.171784	0.358598
C17orf96	1047.2	-0.337341	0.0795065	-4.24293	2.20618e-05	0.00057054
C17orf97	108.116	0.192079	0.195088	0.984581	0.32483	0.527122
C18orf21	2349.13	0.109198	0.11954	0.913478	0.360991	0.561184
C18orf25	741.496	0.386747	0.149174	2.5926	0.00952548	0.0645243
C18orf8	1699.49	0.0862302	0.0840256	1.02624	0.30478	0.505575
C19orf12	670.633	-0.284971	0.0922923	-3.0877	0.00201712	0.0215528
C19orf24	3289.78	-0.305816	0.150781	-2.02821	0.0425389	0.159666
C19orf25	2330.37	-0.0441368	0.1258	-0.350849	0.725701	0.845136
C19orf43	7271.35	-0.232626	0.14654	-1.58745	0.11241	0.279786
C19orf44	486.469	0.594961	0.106342	5.59477	2.20916e-08	1.24081e-06
C19orf47	1281.63	-0.0216104	0.0811346	-0.266353	0.789967	0.886012
C19orf48	14252.1	0.0774067	0.118004	0.655968	0.511845	0.689469
C19orf52	1094.69	0.181092	0.114725	1.57849	0.114454	0.283025
C19orf53	6750.93	-0.298385	0.147823	-2.01853	0.0435359	0.161504
C19orf54	2081.82	0.00914943	0.110538	0.0827714	0.934033	0.968137
C19orf57	272.748	-0.0307091	0.11949	-0.257002	0.797177	0.891133
C19orf60	998.001	-0.239277	0.167426	-1.42915	0.15296	0.334731
C19orf68	195.764	0.349741	0.162106	2.15748	0.0309679	0.134227
C19orf70	3240.57	-0.277594	0.153349	-1.81022	0.0702619	0.213998
C19orf73	107.51	0.76027	0.20285	3.74795	0.000178288	0.00325745
C1D	733.103	-0.106546	0.176006	-0.605352	0.544945	0.715883
C1GALT1	533.088	0.0346181	0.147445	0.234786	0.814375	0.900463
C1GALT1C1	1367.24	-0.327355	0.0990351	-3.30544	0.000948266	0.0122774
C1orf109	1326.94	0.280668	0.121086	2.31792	0.0204536	0.105458
C1orf112	1294.38	0.270773	0.0723619	3.74192	0.000182617	0.00330981
C1orf115	667.272	0.0176978	0.0989265	0.178898	0.858018	0.92612
C1orf122	2730.61	-0.220063	0.153669	-1.43206	0.152126	0.333917
C1orf123	1622.44	-0.185131	0.138078	-1.34077	0.179996	0.368256
C1orf131	1549.88	0.00611128	0.0767117	0.0796656	0.936503	0.969363
C1orf159	1068.27	-0.170944	0.102448	-1.66859	0.0951979	0.253422
C1orf174	1068.29	0.0681787	0.0923771	0.738048	0.460485	0.646262
C1orf198	1941.26	-0.00110932	0.0893216	-0.0124194	0.990091	0.995591
C1orf21	1138.02	-0.0807014	0.087941	-0.917676	0.358789	0.55913
C1orf226	393.312	0.28065	0.11764	2.38566	0.0170483	0.0946527
C1orf233	1516.49	-0.40763	0.118443	-3.44156	0.000578378	0.00833405
C1orf27	919.221	0.518308	0.108141	4.79289	1.64396e-06	6.17718e-05
C1orf35	2641.05	0.147384	0.137063	1.0753	0.282241	0.482972
C1orf43	11000.2	-0.161405	0.0876828	-1.84078	0.0656534	0.206236
C1orf50	541.687	0.0265159	0.116732	0.227151	0.820306	0.90424
C1orf52	1875.57	-0.00244949	0.0907626	-0.0269879	0.978469	0.990303
C1orf53	164.928	-0.347827	0.183805	-1.89237	0.0584423	0.193015
C1orf56	220.269	0.0808621	0.143199	0.564683	0.572289	0.735707
C1orf74	539.066	0.672332	0.0911079	7.37951	1.58875e-13	2.44759e-11
C1orf95	131.636	0.0997969	0.169101	0.590162	0.555082	0.723862
C1QBP	25783.4	-0.228888	0.130862	-1.74907	0.0802782	0.230797
C1QL1	328.083	-0.181616	0.14197	-1.27925	0.200809	0.39241
C1QL4	190.871	-0.16078	0.218911	-0.734452	0.462674	0.648404
C1R	175.365	-0.250667	0.156525	-1.60145	0.109277	0.275249
C20orf196	191.378	-0.0487012	0.127501	-0.381966	0.702487	0.830023
C20orf24	600.393	-0.077491	0.121355	-0.638549	0.523117	0.700172
C20orf27	8371.83	-0.355922	0.135548	-2.6258	0.00864466	0.059921
C20orf96	360.764	0.0370185	0.127979	0.289254	0.772387	0.874848
C21orf2	531.267	-0.119119	0.117497	-1.0138	0.310679	0.512287
C21orf33	537.787	-0.238711	0.267777	-0.891454	0.372686	0.571596
C21orf58	644.323	0.235634	0.109955	2.143	0.0321128	0.136933
C21orf59	2948.69	-0.0872574	0.116115	-0.751473	0.452368	0.638275
C21orf91	476.72	0.304501	0.173902	1.75099	0.0799469	0.230336
C22orf29	2679.23	0.207823	0.07974	2.60626	0.00915368	0.0625665
C22orf39	1360.79	-0.15016	0.0841558	-1.78431	0.0743725	0.220905
C22orf46	709.869	0.0264416	0.112476	0.235086	0.814142	0.900298
C2CD2L	798.897	0.361203	0.0895938	4.03156	5.54073e-05	0.00125385
C2CD3	769.011	0.456891	0.147576	3.09597	0.00196171	0.0211763
C2CD5	1104.86	-0.0513329	0.130935	-0.392047	0.695023	0.824819
C2orf42	340.519	0.783797	0.120914	6.48225	9.03671e-11	8.77945e-09
C2orf44	1412.03	0.489882	0.0977507	5.01154	5.39961e-07	2.21405e-05
C2orf47	1199.83	-0.00915281	0.095885	-0.0954561	0.923953	0.963441
C2orf49	704.807	0.102291	0.098473	1.03877	0.298913	0.500747
C2orf68	1039.27	-0.16628	0.101026	-1.6459	0.0997834	0.261434
C2orf72	167.341	-0.253542	0.136764	-1.85387	0.063758	0.202867
C2orf74	278.766	0.272082	0.203146	1.33934	0.18046	0.368995
C2orf76	145.183	-0.00213649	0.211809	-0.0100869	0.991952	0.996125
C3orf14	994.395	-0.191928	0.142293	-1.34882	0.177394	0.365241
C3orf17	1684.66	0.250229	0.0821447	3.0462	0.00231754	0.023757
C3orf33	276.788	0.321996	0.147501	2.18301	0.0290348	0.129206
C3orf38	886.487	0.240599	0.0945755	2.54399	0.0109595	0.070771
C3orf52	414.513	0.260778	0.0941758	2.76905	0.00562198	0.0445463
C3orf58	684.391	0.0654747	0.163913	0.399449	0.689563	0.820959
C3orf62	278.994	0.448763	0.12046	3.7254	0.000195003	0.00348741
C3orf80	117.932	0.0643741	0.199733	0.322301	0.747224	0.859997
C4orf27	1136.34	-0.0611434	0.162606	-0.376021	0.706901	0.832411
C4orf29	110.103	0.488916	0.24536	1.99265	0.0462997	0.167718
C4orf3	1989.42	-0.160795	0.139317	-1.15416	0.248435	0.444096
C4orf32	697.943	-0.0643498	0.157048	-0.409746	0.681993	0.815548
C4orf33	591.278	-0.0749523	0.0943476	-0.794427	0.426947	0.618511
C4orf46	1055.4	-0.0951803	0.108027	-0.88108	0.378274	0.576255
C4orf48	599.565	-0.230589	0.24295	-0.949124	0.342558	0.542937
C5orf15	2862.52	-0.163837	0.137693	-1.18987	0.234097	0.428711
C5orf22	1365.52	0.142278	0.106855	1.33151	0.183021	0.372676
C5orf24	1482.21	0.0806434	0.193874	0.415957	0.677441	0.812671
C5orf30	647.713	0.189511	0.143552	1.32015	0.186783	0.376781
C5orf34	351.271	0.223573	0.102666	2.17768	0.0294297	0.130166
C5orf45	989.171	0.122062	0.124152	0.983165	0.325526	0.527891
C5orf51	1609.83	0.279782	0.159629	1.7527	0.0796533	0.229806
C5orf63	172.32	0.171587	0.141331	1.21408	0.224719	0.418906
C6orf1	532.233	-0.244311	0.130704	-1.86919	0.0615967	0.198227
C6orf106	3453.26	0.0436269	0.0975671	0.447147	0.654769	0.796446
C6orf120	1807.92	-0.0760172	0.0837182	-0.908013	0.363872	0.563225
C6orf136	892.891	0.277341	0.143362	1.93455	0.0530452	0.182544
C6orf203	356.077	0.041261	0.148358	0.278117	0.780922	0.879802
C6orf226	99.7048	-0.510595	0.208439	-2.44961	0.014301	0.0843623
C6orf47	888.543	0.0782176	0.125649	0.622507	0.533609	0.708392
C6orf48	2495.52	0.549785	0.153365	3.58481	0.000337324	0.00535744
C6orf62	2927.76	0.0428208	0.0606708	0.705789	0.480319	0.663817
C6orf89	2805.99	-0.0382377	0.0699795	-0.546413	0.584782	0.746009
C7orf13	110.461	-0.199342	0.243302	-0.819317	0.412606	0.605791
C7orf25	525.531	0.107827	0.110462	0.976148	0.328991	0.530716
C7orf26	1022.3	0.0820008	0.0856766	0.957097	0.338518	0.53929
C7orf31	358.903	0.183795	0.138198	1.32994	0.183538	0.373101
C7orf43	811.551	-0.0075033	0.098784	-0.0759566	0.939454	0.970547
C7orf49	2849.32	0.149487	0.0808079	1.84991	0.0643272	0.203702
C7orf50	2563.14	-0.242844	0.132231	-1.83652	0.0662815	0.207363
C7orf55	889.295	-0.341888	0.198534	-1.72206	0.0850587	0.237759
C7orf73	2789.75	-0.185333	0.102716	-1.80433	0.0711803	0.215705
C8orf33	6774.21	-0.137656	0.0601265	-2.28944	0.0220536	0.11036
C8orf58	203.991	0.0608637	0.172895	0.352028	0.724818	0.84477
C8orf59	2395.39	-0.222966	0.144213	-1.54609	0.122084	0.292439
C8orf76	434.404	0.011765	0.166171	0.0708009	0.943556	0.97296
C8orf82	1272.26	-0.183004	0.122679	-1.49174	0.135769	0.311384
C8orf88	572.479	-0.244917	0.124617	-1.96536	0.0493729	0.17417
C9orf114	2872.17	-0.0310935	0.094741	-0.328195	0.742765	0.857507
C9orf116	377.326	-0.217495	0.19831	-1.09674	0.272754	0.471072
C9orf142	2532.67	-0.152862	0.159692	-0.95723	0.338451	0.53929
C9orf156	672.165	0.376172	0.106603	3.5287	0.000417604	0.00638786
C9orf16	2439.73	-0.420602	0.167283	-2.51431	0.0119264	0.0750158
C9orf3	383.507	0.248907	0.130642	1.90526	0.0567459	0.189399
C9orf40	1385.95	-0.0160975	0.116613	-0.138043	0.890207	0.944788
C9orf64	653.249	0.128395	0.112903	1.13721	0.25545	0.451824
C9orf69	3276.49	-0.109986	0.0678165	-1.62182	0.104843	0.269132
C9orf72	313.671	0.265708	0.166478	1.59605	0.110478	0.277197
C9orf78	2135.62	-0.1573	0.101615	-1.548	0.121623	0.292242
C9orf85	187.753	0.358404	0.144474	2.48076	0.0131103	0.079562
C9orf89	534.799	-0.178916	0.16366	-1.09321	0.2743	0.472698
C9orf9	114.133	-0.135777	0.229045	-0.592794	0.553319	0.722571
C9orf91	754.979	0.0705403	0.0971193	0.726326	0.467639	0.653583
CA11	579.9	-0.237282	0.118123	-2.00877	0.0445613	0.163758
CA12	381.364	0.0071375	0.0940355	0.0759021	0.939497	0.970547
CA2	2760.12	-0.1795	0.0649321	-2.76443	0.00570215	0.0450821
CA5BP1	490.142	-0.17486	0.13715	-1.27496	0.202323	0.393924
CA8	297.067	0.0100992	0.110049	0.0917699	0.926881	0.96509
CAAP1	866.556	0.10382	0.166989	0.621717	0.534128	0.708528
CAB39	1660.48	0.14459	0.131536	1.09925	0.271661	0.469712
CABIN1	4873.38	0.0204568	0.0886019	0.230884	0.817405	0.902425
CABLES1	2264.83	-0.00627766	0.0786413	-0.0798265	0.936375	0.969363
CABLES2	650.559	-0.134612	0.0928343	-1.45002	0.147052	0.327029
CABP1	86.8929	0.0344709	0.206099	0.167254	0.86717	0.930654
CABYR	290.652	0.208177	0.141172	1.47463	0.140313	0.317485
CACFD1	701.25	-0.183484	0.0909805	-2.01674	0.0437222	0.161972
CACHD1	944.98	0.570462	0.154667	3.68832	0.000225742	0.00390993
CACNA1H	851.062	0.020744	0.102514	0.202353	0.839641	0.916652
CACNA2D1	415.205	0.234792	0.228181	1.02897	0.303493	0.504683
CACNA2D2	372.97	-0.0177409	0.11449	-0.154956	0.876856	0.936425
CACNA2D3	232.873	0.220497	0.124278	1.77423	0.0760259	0.223518
CACNB1	235.497	0.75645	0.136813	5.52907	3.21938e-08	1.72725e-06
CACNB3	365.161	-0.0397793	0.131344	-0.302864	0.761994	0.868732
CACTIN	1853.64	0.111442	0.079133	1.40829	0.159044	0.342206
CACUL1	2125.69	0.112711	0.0818251	1.37746	0.168371	0.35477
CACYBP	8468.53	-0.189534	0.1166	-1.62551	0.104054	0.268059
CAD	6125.36	0.318981	0.103362	3.08606	0.00202827	0.0215922
CADM1	1995.05	-0.15377	0.0929601	-1.65415	0.0980976	0.258281
CADM4	495.304	-0.203047	0.107634	-1.88646	0.0592328	0.194128
CADPS2	527.863	0.218535	0.112187	1.94796	0.0514199	0.179036
CALCB	1038.32	-0.146511	0.107881	-1.35807	0.17444	0.361624
CALCOCO1	861.84	-0.0655235	0.0829754	-0.789673	0.429719	0.620215
CALCOCO2	1947.44	-0.00140684	0.0655745	-0.0214541	0.982883	0.992176
CALD1	2476.57	-0.0809051	0.103614	-0.780833	0.434901	0.624663
CALM1	9854.19	-0.254501	0.0777788	-3.27211	0.00106747	0.0133856
CALM2	12371.1	-0.274299	0.100839	-2.72018	0.00652473	0.0495163
CALM3	19330.2	-0.244537	0.0631672	-3.87126	0.000108273	0.00216225
CALML4	350.683	-0.0355466	0.142383	-0.249654	0.802855	0.893979
CALR	24517	-0.203948	0.0691621	-2.94883	0.00318976	0.0296794
CALU	5896.57	-0.0932899	0.0763165	-1.22241	0.221554	0.415447
CAMK1	1427.12	-0.212971	0.11651	-1.82791	0.0675625	0.209751
CAMK1D	352.835	0.0157153	0.116171	0.135277	0.892393	0.946297
CAMK2B	81.8903	0.184056	0.257415	0.715014	0.474601	0.659293
CAMK2D	907.778	-0.0457766	0.095216	-0.480766	0.630683	0.779428
CAMK2G	1133.96	0.0783926	0.0777445	1.00834	0.313293	0.514929
CAMK2N1	279.477	-0.0441207	0.175094	-0.251982	0.801055	0.89306
CAMK2N2	142.85	-0.109778	0.195871	-0.560459	0.575166	0.738189
CAMK4	96.7535	0.329571	0.254277	1.29611	0.194937	0.385937
CAMKK1	694.56	0.246381	0.117224	2.1018	0.035571	0.144536
CAMKK2	1969.49	-0.00706263	0.0701278	-0.100711	0.91978	0.961507
CAMKMT	323.185	-0.189238	0.144282	-1.31158	0.189661	0.379745
CAMKV	921.162	-0.0389243	0.0771454	-0.504557	0.61387	0.766625
CAMLG	1475.46	-0.0921779	0.090556	-1.01791	0.308721	0.510225
CAMSAP1	1275.33	0.267634	0.166923	1.60334	0.10886	0.274479
CAMSAP2	1238.22	0.249503	0.17955	1.3896	0.16465	0.350005
CAMSAP3	584.628	0.171461	0.104678	1.63799	0.101424	0.264273
CAMTA1	2029.99	-0.178587	0.144839	-1.23301	0.217574	0.411129
CAMTA2	1633.55	0.0776951	0.0840344	0.924564	0.355193	0.555211
CAND1	5217.43	0.0669337	0.135249	0.494891	0.620677	0.77166
CAND2	856.488	0.22018	0.123059	1.78923	0.073578	0.219736
CANT1	2280.53	-0.0636962	0.0668229	-0.953209	0.340484	0.541212
CANX	29573.7	-0.109958	0.106371	-1.03372	0.301266	0.502685
CAP1	5480.5	-0.117188	0.0726183	-1.61376	0.10658	0.271211
CAP2	280.72	0.124875	0.145261	0.859658	0.389977	0.587855
CAPG	176.229	-0.277698	0.181532	-1.52975	0.126079	0.297716
CAPN1	3231.54	-0.218028	0.0594591	-3.66686	0.00024555	0.00417667
CAPN10	970.945	0.00799477	0.0875785	0.0912869	0.927265	0.965256
CAPN15	3427.94	-0.0711772	0.0869635	-0.818472	0.413088	0.606018
CAPN2	4049.3	-0.0995838	0.0747517	-1.3322	0.182796	0.37236
CAPN5	275.067	-0.174752	0.116658	-1.49798	0.134138	0.308904
CAPN7	1109.62	0.286574	0.107982	2.65392	0.00795625	0.0566716
CAPNS1	11082.2	-0.301135	0.140669	-2.14073	0.0322957	0.137333
CAPRIN1	10832.6	0.0519519	0.102982	0.504478	0.613926	0.766625
CAPRIN2	471.909	0.217958	0.0994279	2.19212	0.0283708	0.127746
CAPZA1	7258.26	-0.127403	0.0562612	-2.26449	0.0235437	0.114885
CAPZA2	2082.97	-0.130129	0.105096	-1.23819	0.215646	0.408828
CAPZB	5981.31	-0.24747	0.0891306	-2.77649	0.00549492	0.0437645
CARD10	427.621	0.186486	0.093073	2.00365	0.0451072	0.164834
CARD8	467.235	0.189086	0.12796	1.47769	0.139492	0.316442
CARHSP1	2823.91	-0.21763	0.133411	-1.63128	0.102832	0.266524
CARKD	608.856	0.143453	0.0995407	1.44115	0.149543	0.330737
CARM1	4869.34	-0.102772	0.0845728	-1.21519	0.224294	0.418548
CARNMT1	223.475	0.521809	0.363667	1.43485	0.151329	0.333115
CARS	2085.45	0.0249038	0.0673104	0.369984	0.711394	0.835058
CARS2	849.824	-0.0623118	0.102341	-0.608867	0.542613	0.714299
CASC10	241.288	-0.0117645	0.169165	-0.0695448	0.944556	0.973475
CASC3	5535.43	0.0137617	0.0722738	0.190411	0.848987	0.920703
CASC4	977.078	-0.0545414	0.180675	-0.301875	0.762747	0.869082
CASC9	150.007	0.175759	0.151404	1.16086	0.245697	0.441058
CASK	1148.84	-0.0528892	0.13137	-0.402598	0.687244	0.819737
CASKIN1	201.207	0.171006	0.175853	0.972432	0.330836	0.532428
CASKIN2	804.18	0.317628	0.141073	2.25152	0.0243529	0.116675
CASP10	351.71	0.219937	0.108564	2.02587	0.0427781	0.159882
CASP2	3503.65	0.260135	0.081164	3.20505	0.00135039	0.0161987
CASP3	1001.31	0.17205	0.0903719	1.9038	0.0569363	0.189799
CASP6	405.335	-0.0563716	0.121796	-0.462835	0.643483	0.789097
CASP7	1049.27	0.000933558	0.0815214	0.0114517	0.990863	0.996035
CASP8	443.123	0.144435	0.159931	0.903111	0.366467	0.566122
CASP8AP2	607.503	0.718456	0.212585	3.37962	0.000725868	0.00998087
CASP9	775.229	0.0494468	0.0822588	0.601113	0.547765	0.718019
CAST	2707.3	-0.0631423	0.103806	-0.608272	0.543007	0.714615
CAT	1071.36	-0.0159627	0.0774341	-0.206145	0.836678	0.914151
CAV1	275.409	-0.304066	0.122246	-2.48733	0.0128707	0.0788116
CAV2	363.84	-0.144417	0.185283	-0.77944	0.435721	0.625091
CBFA2T2	521.353	0.43071	0.13247	3.25137	0.0011485	0.0141386
CBFB	2195.44	-0.19702	0.0891115	-2.21094	0.0270402	0.12398
CBL	1064.35	0.363314	0.21727	1.67217	0.0944899	0.252215
CBLB	246.405	0.386785	0.118765	3.25672	0.00112707	0.0139384
CBLL1	1195.59	0.451349	0.114598	3.93852	8.19856e-05	0.001737
CBLN1	133.931	-0.267817	0.187653	-1.42719	0.153526	0.335146
CBR1	3846.99	-0.175493	0.117705	-1.49096	0.135971	0.31165
CBR3	119.641	-0.25003	0.209457	-1.19371	0.232593	0.426972
CBR4	909.383	0.0741301	0.0970042	0.764194	0.444751	0.632661
CBS	1014.15	-0.193209	0.555608	-0.347743	0.728034	0.84639
CBWD1	912.707	-0.165644	0.134054	-1.23565	0.216587	0.409823
CBWD2	676.482	-0.0485407	0.153425	-0.31638	0.751714	0.862968
CBWD5	97.3481	0.0638147	0.261441	0.244088	0.807162	0.896505
CBWD6	172.622	0.285313	0.209509	1.36182	0.173256	0.360207
CBX1	4149.96	-0.12864	0.0740891	-1.73629	0.0825134	0.234411
CBX2	3121.87	0.142095	0.0820428	1.73197	0.0832791	0.23521
CBX3	9249.97	-0.234883	0.113342	-2.07234	0.0382339	0.150315
CBX4	1270.09	0.212935	0.132003	1.6131	0.106722	0.271437
CBX5	4323.91	-0.153011	0.0666031	-2.29735	0.0215986	0.10879
CBX6	7380.7	-0.285046	0.0892656	-3.19323	0.00140689	0.0167276
CBX8	679.416	0.147337	0.109825	1.34156	0.179738	0.367869
CBY1	1159.29	-0.183011	0.132993	-1.37609	0.168794	0.355301
CC2D1A	2116.76	0.153644	0.070558	2.17755	0.0294395	0.130166
CC2D1B	1728.05	0.2857	0.0643227	4.44166	8.92658e-06	0.000258081
CC2D2A	434.086	0.00905029	0.0934154	0.0968822	0.92282	0.963023
CCAR1	2962.42	0.25688	0.111124	2.31165	0.0207972	0.106539
CCAR2	4317.74	0.03476	0.0651132	0.533839	0.593453	0.751211
CCBL1	514.215	0.00944176	0.115527	0.0817275	0.934863	0.968513
CCBL2	1407.88	-0.123725	0.106861	-1.15781	0.24694	0.442212
CCDC101	837.462	-0.00350821	0.146275	-0.0239836	0.980866	0.99116
CCDC102A	562.945	-0.0818583	0.115507	-0.708688	0.478518	0.662261
CCDC103	176.401	0.135419	0.204189	0.663202	0.507201	0.68628
CCDC106	886.877	-0.150894	0.120108	-1.25632	0.209001	0.401398
CCDC107	621.893	-0.100221	0.166487	-0.601975	0.547191	0.717833
CCDC109B	740.163	-0.108917	0.0970978	-1.12172	0.26198	0.45953
CCDC112	265.515	0.229793	0.154729	1.48513	0.137508	0.313721
CCDC113	173.616	0.122417	0.156735	0.781042	0.434778	0.62457
CCDC115	980.764	-0.0819935	0.0886183	-0.925243	0.354839	0.554819
CCDC117	2630.95	0.128221	0.104563	1.22625	0.220103	0.414096
CCDC12	1868.81	-0.137108	0.141737	-0.967343	0.333373	0.535462
CCDC120	544.676	0.272869	0.120736	2.26005	0.0238179	0.115708
CCDC124	7024.38	-0.279335	0.132845	-2.10271	0.0354908	0.144319
CCDC125	423.975	0.224772	0.131615	1.70779	0.0876744	0.241194
CCDC126	157.279	0.066421	0.205143	0.323778	0.746106	0.859793
CCDC127	765.754	0.178121	0.100997	1.76364	0.077793	0.227123
CCDC130	1007.05	0.318472	0.0948723	3.35685	0.000788351	0.010561
CCDC134	287.404	-0.12698	0.11277	-1.12601	0.260161	0.45753
CCDC136	234.033	0.0444748	0.125039	0.355687	0.722075	0.842643
CCDC137	3129.75	0.181371	0.0985909	1.83963	0.0658222	0.206455
CCDC138	1042.93	0.286529	0.0989028	2.89708	0.00376659	0.033409
CCDC14	1754.84	0.0479822	0.0948722	0.505757	0.613028	0.766125
CCDC142	639.295	0.573857	0.145967	3.93141	8.44486e-05	0.0017787
CCDC150	423.336	0.220986	0.121572	1.81774	0.069104	0.212368
CCDC157	150.024	0.602039	0.150723	3.99434	6.48752e-05	0.00142488
CCDC163P	249.77	0.214562	0.128321	1.67207	0.0945105	0.252215
CCDC167	2359.41	-0.361558	0.13941	-2.59348	0.00950099	0.0644394
CCDC174	790.333	0.768989	0.135578	5.67194	1.41186e-08	8.142e-07
CCDC18	495.42	0.315169	0.111666	2.82244	0.00476594	0.0397156
CCDC181	309.234	0.0585735	0.154424	0.379303	0.704463	0.831083
CCDC184	109.878	-0.44345	0.181155	-2.44791	0.0143688	0.0845816
CCDC22	1588.94	-0.0408119	0.0869299	-0.46948	0.638726	0.785139
CCDC24	189.063	-0.133385	0.192567	-0.692671	0.488516	0.67153
CCDC25	1266.38	-0.0283435	0.0771231	-0.36751	0.713239	0.836461
CCDC28A	1002.23	-0.121968	0.136813	-0.891495	0.372664	0.571596
CCDC28B	794.556	-0.276786	0.140389	-1.97156	0.0486594	0.172721
CCDC3	1096.29	-0.209977	0.0902642	-2.32625	0.0200055	0.104322
CCDC34	998.007	-0.160494	0.122177	-1.31362	0.188976	0.378724
CCDC43	1467.93	0.0273357	0.0820058	0.333339	0.738878	0.854668
CCDC47	3861.97	0.00256922	0.0897323	0.028632	0.977158	0.989825
CCDC50	1355.98	0.0288478	0.0679634	0.424461	0.671229	0.808595
CCDC51	1755.64	-0.085276	0.125203	-0.681103	0.495806	0.678223
CCDC53	539.757	-0.248693	0.141584	-1.75651	0.0790013	0.22877
CCDC57	361.006	0.231389	0.125815	1.83912	0.0658969	0.206579
CCDC58	1123.87	-0.101015	0.13958	-0.723711	0.469243	0.655038
CCDC59	1719.41	0.0344437	0.147689	0.233218	0.815592	0.901255
CCDC6	1962.6	0.0917157	0.116689	0.785987	0.431875	0.621996
CCDC61	209.658	-0.125019	0.198051	-0.631245	0.52788	0.704192
CCDC64	129.933	-0.0324491	0.195294	-0.166156	0.868035	0.930968
CCDC66	656.959	0.581257	0.101097	5.74951	8.95005e-09	5.48394e-07
CCDC69	449.901	-0.118231	0.12932	-0.914245	0.360588	0.560799
CCDC71	1536.66	0.308366	0.104252	2.95789	0.00309755	0.0292761
CCDC71L	572.889	0.113655	0.131854	0.86198	0.388699	0.586583
CCDC74A	556.444	-0.288938	0.131518	-2.19695	0.0280242	0.126839
CCDC74B	333.695	-0.397361	0.174137	-2.28189	0.0224958	0.11164
CCDC77	773.473	0.360151	0.100951	3.56757	0.000360307	0.00566406
CCDC78	121.309	0.305913	0.276073	1.10809	0.267823	0.466133
CCDC8	1712.69	0.177029	0.0874676	2.02394	0.0429765	0.160355
CCDC80	167.218	0.104571	0.140128	0.746255	0.455513	0.641538
CCDC82	326.711	-0.0403372	0.150046	-0.268832	0.788059	0.885345
CCDC84	649.092	0.0898917	0.185402	0.484848	0.627784	0.777627
CCDC85B	2227.5	-0.301934	0.208346	-1.4492	0.147282	0.327213
CCDC85C	3697.25	-0.118567	0.0734981	-1.6132	0.106701	0.271437
CCDC86	10109.6	-0.133704	0.103417	-1.29286	0.196058	0.38702
CCDC88A	1302.97	0.136372	0.128598	1.06045	0.288941	0.490313
CCDC88C	504.813	0.584928	0.169597	3.44894	0.000562788	0.00815741
CCDC89	81.8938	-0.155257	0.205381	-0.755947	0.449681	0.635898
CCDC9	467.472	0.391672	0.101319	3.86572	0.000110764	0.0022079
CCDC90B	982.745	0.120776	0.0941814	1.28238	0.19971	0.391222
CCDC91	337.252	0.0649635	0.106474	0.610136	0.541772	0.713789
CCDC92	821.086	-0.259467	0.117269	-2.21257	0.0269272	0.123672
CCDC93	1190.45	0.392543	0.115531	3.39773	0.000679479	0.00954101
CCDC94	2047.36	-0.148225	0.132038	-1.12259	0.26161	0.459195
CCDC97	2995.47	-0.02715	0.074764	-0.363143	0.716498	0.838388
CCHCR1	1266.47	-0.0104936	0.0779216	-0.134668	0.892874	0.946501
CCM2	898.721	-0.178503	0.113024	-1.57933	0.114261	0.282678
CCNA2	4563.86	0.135858	0.0904222	1.50249	0.132971	0.307651
CCNB1	10221.2	-0.240116	0.0701711	-3.42186	0.00062195	0.00886446
CCNB1IP1	2591.22	0.262019	0.109574	2.39125	0.016791	0.0941386
CCNB2	3074.19	-0.140265	0.0902398	-1.55436	0.120098	0.29013
CCNC	2633.99	-0.0676898	0.0756871	-0.894337	0.371142	0.570385
CCND1	1222.14	-0.0416965	0.122191	-0.341241	0.732922	0.849813
CCND2	2984.75	-0.210227	0.0694004	-3.0292	0.00245204	0.0248132
CCND3	2281.21	-0.172476	0.0845149	-2.04077	0.0412735	0.156723
CCNDBP1	1049.31	-0.0565836	0.082321	-0.687352	0.491861	0.674066
CCNE1	1229.65	-0.174358	0.107502	-1.62191	0.104823	0.269132
CCNE2	397.919	-0.111024	0.206867	-0.536693	0.59148	0.750348
CCNF	3323.43	0.150705	0.0945258	1.59433	0.110863	0.277648
CCNG1	8340.7	-0.136605	0.0787655	-1.73432	0.0828607	0.234841
CCNG2	454.016	-0.0770707	0.149562	-0.51531	0.606337	0.761292
CCNH	1337.05	0.00998078	0.11048	0.0903404	0.928017	0.965345
CCNI	3565.81	-0.00790309	0.130444	-0.0605859	0.951689	0.976872
CCNJ	999.137	0.123403	0.162841	0.757814	0.448563	0.635225
CCNJL	84.863	-0.207981	0.227106	-0.915786	0.359779	0.560026
CCNK	2926.88	0.0105754	0.0614336	0.172144	0.863325	0.928966
CCNL1	1677.9	0.699484	0.0923937	7.57069	3.71249e-14	6.25554e-12
CCNL2	4468.06	0.101358	0.106685	0.950066	0.342079	0.542736
CCNO	227.88	0.0132697	0.177758	0.0746501	0.940493	0.971111
CCNT1	1771.48	0.622766	0.154481	4.03134	5.54607e-05	0.00125385
CCNT2	1195.81	0.600452	0.191132	3.14156	0.0016805	0.0189703
CCNY	1784.71	-0.15048	0.0718746	-2.09365	0.0362915	0.14658
CCNYL1	796.045	-0.0167363	0.0808503	-0.207003	0.836008	0.913703
CCP110	632.183	0.299345	0.202633	1.47727	0.139603	0.316442
CCPG1	229.515	-0.119004	0.151686	-0.784545	0.432721	0.622859
CCS	1013.05	0.0157316	0.160226	0.0981834	0.921787	0.962485
CCSAP	1075.95	0.0822842	0.12375	0.664923	0.506099	0.685134
CCSER2	617.16	0.201449	0.140563	1.43316	0.151813	0.333569
CCT2	17927.1	-0.111128	0.0895994	-1.24027	0.214875	0.408104
CCT3	40361.6	-0.165416	0.0862315	-1.91828	0.0550751	0.186159
CCT4	24208.6	-0.138581	0.0677453	-2.04561	0.0407943	0.155561
CCT5	23124.3	-0.147913	0.100165	-1.47669	0.139758	0.316696
CCT6A	18247.4	-0.10786	0.0678245	-1.59027	0.111773	0.278825
CCT6P1	375.52	0.830887	0.120835	6.87624	6.14542e-12	7.28266e-10
CCT7	33212.1	-0.243251	0.0896828	-2.71234	0.00668094	0.0502772
CCT8	14316.7	-0.166408	0.103548	-1.60705	0.108043	0.273378
CCZ1	703.822	-0.204874	0.142455	-1.43817	0.150387	0.331923
CCZ1B	316.403	-0.0918676	0.197776	-0.464503	0.642287	0.788343
CD151	6150.93	-0.325623	0.108175	-3.01015	0.00261116	0.0258101
CD164	5305.95	-0.248493	0.141016	-1.76216	0.0780421	0.227389
CD276	3879.38	-0.234648	0.0785259	-2.98816	0.00280661	0.0271692
CD2AP	1085.7	0.0988126	0.186792	0.528999	0.596806	0.754067
CD2BP2	6003.83	-0.114011	0.0751264	-1.51759	0.129117	0.301581
CD320	6502.73	-0.285471	0.129427	-2.20565	0.0274085	0.124842
CD3EAP	2078.29	-0.00453114	0.0715493	-0.0633289	0.949505	0.975981
CD40	132.802	0.0336693	0.212663	0.158322	0.874203	0.935112
CD46	1919.13	-0.154637	0.129123	-1.19759	0.231076	0.425533
CD47	1506.92	-0.17852	0.090676	-1.96877	0.0489792	0.173462
CD55	1339.63	-0.228051	0.0772498	-2.95212	0.00315597	0.029602
CD58	260.01	0.020414	0.11943	0.170928	0.86428	0.929504
CD59	3385.88	-0.216692	0.0915274	-2.36751	0.0179082	0.0972418
CD63	7064.06	-0.316029	0.14443	-2.18811	0.0286615	0.128571
CD70	139.784	-0.167973	0.201928	-0.831844	0.405497	0.600149
CD81	13392.6	-0.38627	0.12361	-3.12491	0.00177861	0.0197612
CD82	120.519	-0.396368	0.161749	-2.45051	0.0142654	0.0842781
CD83	208.078	-0.270238	0.125196	-2.15852	0.0308875	0.134103
CD9	1004.91	-0.399374	0.126781	-3.1501	0.00163213	0.0186056
CD99	7569.82	-0.301123	0.133724	-2.25182	0.0243336	0.116675
CD99L2	2032.15	-0.164287	0.0737674	-2.22709	0.0259412	0.121104
CDADC1	316.588	0.192038	0.151064	1.27123	0.203646	0.395424
CDAN1	693.004	0.484279	0.106751	4.53651	5.71933e-06	0.000176726
CDC123	6168.15	-0.160951	0.113217	-1.42161	0.155138	0.336961
CDC14A	564.031	0.26807	0.146295	1.83239	0.0668936	0.208672
CDC14B	1608.65	-0.0272668	0.1283	-0.212524	0.831699	0.910932
CDC16	1461.12	0.00502157	0.0851775	0.0589542	0.952989	0.977206
CDC20	9666.92	-0.176122	0.101363	-1.73753	0.0822935	0.234033
CDC23	2754.94	0.0323843	0.0945888	0.342369	0.732073	0.849327
CDC25A	4926.48	0.35303	0.0813901	4.33751	1.44108e-05	0.00039172
CDC25B	3466.29	-0.102982	0.0664098	-1.55071	0.120971	0.29126
CDC25C	925.188	0.0583328	0.112728	0.517464	0.604832	0.760269
CDC26	340.663	-0.216329	0.194814	-1.11044	0.26681	0.464982
CDC27	3100.38	0.235203	0.140755	1.67101	0.09472	0.252524
CDC34	3724.34	-0.20874	0.0965396	-2.16222	0.0306011	0.13342
CDC37	12790.7	-0.210632	0.0965869	-2.18075	0.0292021	0.129648
CDC37L1	307.673	0.302352	0.131782	2.29433	0.0217716	0.109457
CDC40	695.399	0.145003	0.153295	0.94591	0.344195	0.544491
CDC42	6899.04	-0.208602	0.0781895	-2.66791	0.00763249	0.0549091
CDC42BPA	1647.36	0.165847	0.128782	1.28781	0.197811	0.388638
CDC42BPB	2090.97	0.17499	0.119556	1.46366	0.143286	0.321982
CDC42EP1	7664.69	-0.180352	0.0963323	-1.87219	0.0611805	0.197951
CDC42EP2	1090.87	0.560268	0.105717	5.2997	1.15996e-07	5.43871e-06
CDC42EP3	371.572	0.222369	0.130201	1.70789	0.0876573	0.241194
CDC42EP4	1010.59	0.0719898	0.0828756	0.86865	0.385039	0.582937
CDC42SE1	2558.13	0.0868892	0.0821173	1.05811	0.290004	0.491499
CDC42SE2	598.565	-0.0697856	0.120248	-0.580346	0.561681	0.729253
CDC45	4840.94	-0.0850644	0.0901815	-0.943258	0.345549	0.545673
CDC5L	3392.78	0.25489	0.107018	2.38176	0.0172303	0.0951903
CDC6	4714.82	0.224213	0.0649075	3.45435	0.000551621	0.00805299
CDC7	3348.6	0.18757	0.0765052	2.45173	0.0142173	0.0840567
CDC73	1341.44	0.2249	0.158268	1.42101	0.155314	0.337207
CDCA2	974.947	0.310164	0.110833	2.79848	0.0051344	0.0416938
CDCA3	2616.16	-0.199811	0.127797	-1.5635	0.117935	0.287451
CDCA4	2336.77	0.0437684	0.0703524	0.622131	0.533856	0.708392
CDCA5	5105.36	0.101459	0.0721175	1.40685	0.159471	0.342753
CDCA7	3812.66	0.0853109	0.0819854	1.04056	0.298079	0.500038
CDCA7L	1460.99	-0.00760775	0.0807788	-0.0941801	0.924966	0.964032
CDCA8	3243.43	0.0497613	0.0541708	0.918599	0.358305	0.558623
CDH2	2316.68	-0.0412962	0.152973	-0.269957	0.787193	0.884801
CDH23	123.093	0.00238037	0.175309	0.0135782	0.989167	0.995258
CDH24	539.899	-0.130543	0.119431	-1.09305	0.274374	0.472698
CDHR1	398.198	-0.227731	0.126751	-1.79667	0.0723873	0.217869
CDIP1	2527.69	-0.152294	0.0882409	-1.72589	0.084367	0.236684
CDIPT	5351.37	-0.235984	0.098855	-2.38717	0.0169784	0.0945742
CDK1	3146.02	-0.0859932	0.0856709	-1.00376	0.315493	0.517221
CDK10	1619.16	0.144511	0.110023	1.31346	0.189027	0.378757
CDK11A	384.907	0.56358	0.123996	4.54516	5.48943e-06	0.000170599
CDK11B	1640.81	0.129368	0.0933267	1.38618	0.165691	0.350973
CDK12	3911.8	0.277129	0.184552	1.50164	0.133191	0.307698
CDK13	1523.19	0.267379	0.14049	1.90319	0.0570155	0.189946
CDK14	311.045	0.173475	0.194712	0.890933	0.372965	0.57164
CDK16	11045.1	-0.0738768	0.0670225	-1.10227	0.270345	0.468564
CDK17	606.361	0.378748	0.230172	1.6455	0.0998666	0.261525
CDK18	946.098	-0.0813444	0.108663	-0.74859	0.454105	0.639805
CDK2	3240.14	-0.0454947	0.072007	-0.631809	0.527512	0.704183
CDK20	565.48	0.13776	0.104809	1.31439	0.188714	0.378552
CDK2AP1	3829.09	-0.246642	0.0926317	-2.6626	0.00775385	0.0557079
CDK2AP2	1820.12	-0.161079	0.13608	-1.1837	0.236531	0.43176
CDK4	13989.8	-0.223768	0.102669	-2.17952	0.0292933	0.129893
CDK5	1942.67	-0.279034	0.158557	-1.75983	0.0784362	0.227929
CDK5R1	401.785	-0.21887	0.164826	-1.32788	0.184217	0.373771
CDK5RAP1	1855.02	0.0345097	0.134014	0.257507	0.796787	0.890974
CDK5RAP2	2059.07	0.278879	0.0958033	2.91096	0.00360325	0.0324353
CDK5RAP3	3220.21	-0.0509182	0.10908	-0.466798	0.640644	0.786779
CDK6	2026.3	0.0433826	0.136368	0.318128	0.750388	0.862015
CDK7	957.982	-0.0198897	0.135883	-0.146374	0.883626	0.94086
CDK8	490.767	0.280475	0.184916	1.51677	0.129324	0.301999
CDK9	2086.81	0.233744	0.0862277	2.71078	0.00671257	0.05048
CDKAL1	563.013	0.0743801	0.093255	0.797599	0.425103	0.616751
CDKN1A	555.791	-0.204948	0.0979949	-2.09142	0.0364907	0.146959
CDKN1B	1108.31	0.0488279	0.124895	0.390953	0.695832	0.825121
CDKN1C	118.362	-0.0740285	0.184763	-0.400666	0.688666	0.820434
CDKN2A	8273.87	-0.283016	0.134067	-2.11101	0.0347716	0.142416
CDKN2AIP	532.742	1.10004	0.152944	7.19246	6.36343e-13	8.91211e-11
CDKN2AIPNL	1675.78	-0.227635	0.0998502	-2.27976	0.0226219	0.111906
CDKN2B	625.393	0.21253	0.0867695	2.44936	0.014311	0.0843623
CDKN2C	3524.97	-0.121617	0.0882907	-1.37746	0.168369	0.35477
CDKN2D	188.043	0.222708	0.178924	1.2447	0.213241	0.406288
CDKN3	1679.74	-0.174608	0.124189	-1.40599	0.159727	0.34292
CDO1	356.964	0.158974	0.112018	1.41919	0.155845	0.337677
CDON	625.573	0.0965052	0.133362	0.723635	0.46929	0.655038
CDPF1	681.635	0.0112584	0.124006	0.0907896	0.92766	0.965345
CDR2	1200.11	0.225266	0.0863971	2.60734	0.00912499	0.0624787
CDR2L	1025.98	-0.144181	0.0737872	-1.95402	0.0506992	0.17738
CDS1	484.19	-0.184656	0.106015	-1.74178	0.0815463	0.233014
CDS2	1562.06	-0.144983	0.0838578	-1.72892	0.0838237	0.235958
CDT1	5955.7	0.234144	0.081128	2.88611	0.0039004	0.0341689
CDV3	7575.94	0.00076383	0.0617301	0.0123737	0.990127	0.995591
CDX2	1283.51	0.127969	0.0939449	1.36217	0.173145	0.360158
CDYL	850.682	0.288123	0.102126	2.82123	0.00478393	0.0397763
CEBPA	893.77	0.0814932	0.127561	0.638856	0.522916	0.700077
CEBPA-AS1	182.761	-0.341748	0.173826	-1.96603	0.049295	0.174123
CEBPB	559.334	-0.0276895	0.144342	-0.191832	0.847874	0.919887
CEBPD	128.014	-0.0991328	0.190232	-0.521115	0.602287	0.758478
CEBPG	1942.34	0.161991	0.0712724	2.27284	0.0230359	0.113206
CEBPZ	2744.57	0.137941	0.103853	1.32824	0.1841	0.37364
CEBPZOS	2093.41	-0.221074	0.120633	-1.83261	0.0668601	0.208628
CECR2	680.342	0.407832	0.176862	2.30594	0.0211141	0.107729
CECR5	4629.54	-0.134305	0.101725	-1.32027	0.186744	0.376773
CELF1	3854.54	0.00906588	0.103626	0.0874864	0.930285	0.966628
CELF2	681.762	0.0505427	0.168337	0.300247	0.763989	0.869536
CELSR1	866.78	0.0544759	0.150049	0.363055	0.716564	0.838388
CELSR2	1027.3	-0.0986191	0.132958	-0.741729	0.458251	0.644222
CENPA	892.382	-0.130713	0.100251	-1.30385	0.192283	0.382651
CENPB	3574.24	-0.15405	0.0602776	-2.55567	0.0105982	0.0692888
CENPBD1	504.545	0.222185	0.110682	2.00742	0.0447049	0.163923
CENPBD1P1	736.885	-0.221893	0.10365	-2.14079	0.0322906	0.137333
CENPC	320.949	0.471963	0.120792	3.90724	9.33564e-05	0.00192865
CENPE	1235.08	0.0989082	0.12042	0.821363	0.41144	0.604738
CENPF	4318.59	0.013435	0.088492	0.151822	0.879327	0.938135
CENPH	1446.64	-0.134762	0.121046	-1.11331	0.265574	0.463892
CENPI	368.362	0.336937	0.228046	1.4775	0.139543	0.316442
CENPJ	769.367	0.516403	0.096913	5.32852	9.90164e-08	4.72475e-06
CENPK	788.654	0.0592271	0.128681	0.460262	0.645328	0.79073
CENPL	492.135	0.606327	0.11012	5.50607	3.66939e-08	1.93028e-06
CENPM	3179.32	-0.132593	0.13138	-1.00923	0.312863	0.514551
CENPN	2220.38	-0.0888418	0.0915341	-0.970587	0.331754	0.533736
CENPO	2170.25	0.227345	0.0966104	2.35321	0.0186121	0.0996588
CENPP	480.305	-0.0905566	0.0928071	-0.975752	0.329188	0.530743
CENPQ	375.443	-0.0181139	0.130667	-0.138626	0.889745	0.944484
CENPT	2879.25	-0.0279953	0.100991	-0.277206	0.781622	0.880407
CENPU	2472.44	-0.0929164	0.0954388	-0.973571	0.33027	0.531825
CENPV	3116.16	-0.278836	0.128769	-2.16539	0.0303576	0.132702
CENPW	2883.71	-0.251892	0.154291	-1.63258	0.102558	0.266117
CEP104	1293.85	0.153742	0.102889	1.49424	0.135112	0.310473
CEP112	138.708	0.24738	0.172547	1.43369	0.15166	0.333383
CEP120	427.094	0.340419	0.190612	1.78593	0.0741112	0.220717
CEP131	985.035	0.213879	0.0947234	2.25793	0.0239497	0.116146
CEP135	498.262	0.300628	0.211863	1.41898	0.155906	0.337677
CEP152	360.515	0.65787	0.129003	5.09967	3.40246e-07	1.46768e-05
CEP162	312.173	0.546384	0.116159	4.70375	2.55432e-06	9.03139e-05
CEP164	1193.66	0.222842	0.0851492	2.61708	0.00886849	0.0611495
CEP170	948.863	0.34274	0.228139	1.50233	0.133012	0.307651
CEP170B	1606.15	0.0706555	0.143643	0.491881	0.622803	0.773501
CEP19	228.662	0.0341045	0.148291	0.229984	0.818104	0.902735
CEP192	659.297	0.76724	0.197012	3.89438	9.84508e-05	0.00199942
CEP250	1505.92	0.398655	0.110831	3.59696	0.000321952	0.00518973
CEP290	499.138	0.375614	0.124433	3.01861	0.00253935	0.0253894
CEP295	805.698	0.864251	0.140928	6.13257	8.64699e-10	6.61341e-08
CEP350	1157.28	0.321008	0.157533	2.03772	0.0415784	0.157161
CEP41	569.643	-0.0165975	0.0854806	-0.194167	0.846045	0.919547
CEP44	811.011	0.0816056	0.127162	0.641746	0.521038	0.698344
CEP55	1502.53	0.0644885	0.0904528	0.712953	0.475875	0.660319
CEP57	1085.17	0.181654	0.0751437	2.41742	0.0156309	0.0896613
CEP57L1	271.055	0.151154	0.121844	1.24056	0.214769	0.408046
CEP63	384.508	0.103659	0.138009	0.751104	0.45259	0.638505
CEP68	956.002	0.431916	0.0903245	4.78183	1.73704e-06	6.47772e-05
CEP70	360.127	-0.0240417	0.123475	-0.194709	0.845621	0.919468
CEP72	463.638	0.481738	0.11548	4.17161	3.02453e-05	0.000748086
CEP76	317.207	0.257361	0.122733	2.09692	0.0360003	0.145912
CEP78	1264.14	0.128893	0.0705988	1.82572	0.0678926	0.210291
CEP83	418.106	0.258504	0.119288	2.16705	0.0302313	0.132333
CEP85	1875.69	0.30657	0.101218	3.02882	0.00245509	0.0248132
CEP89	230.194	0.234696	0.152299	1.54102	0.123313	0.29388
CEP95	1350.7	0.596873	0.0989494	6.0321	1.6184e-09	1.17924e-07
CEP97	487.31	0.341629	0.190243	1.79575	0.0725341	0.218178
CEPT1	1178.03	0.0681358	0.0803025	0.848489	0.396166	0.592874
CERCAM	2492.61	-0.0849545	0.0957793	-0.886982	0.375089	0.573183
CERK	2299.19	-0.0992481	0.084874	-1.16936	0.242259	0.437334
CERS1	600.336	-0.123738	0.188023	-0.658101	0.510474	0.688721
CERS2	6525.24	-0.195204	0.05666	-3.44519	0.000570668	0.00826051
CERS4	430.057	-0.0489081	0.118351	-0.413247	0.679426	0.814103
CERS5	1568.46	-0.136544	0.135784	-1.00559	0.314611	0.516336
CERS6	1764.55	0.014659	0.129827	0.112912	0.910101	0.956394
CES2	1500.79	0.042727	0.122013	0.350185	0.7262	0.845468
CES3	952.366	0.146085	0.0784815	1.8614	0.0626878	0.200363
CETN2	2305.02	-0.261292	0.141143	-1.85126	0.0641328	0.203611
CETN3	722.088	-0.212599	0.125341	-1.69617	0.0898536	0.24494
CFAP20	2362.52	0.0129432	0.0987874	0.13102	0.895759	0.948068
CFAP36	1335.47	-0.0525252	0.139967	-0.375267	0.707462	0.832798
CFAP97	337.16	0.156002	0.282209	0.552789	0.580408	0.742306
CFD	314.648	-0.161327	0.193076	-0.835561	0.403402	0.598539
CFDP1	2578.24	-0.129302	0.129469	-0.99871	0.317935	0.519881
CFL1	35379.3	-0.372979	0.118127	-3.15745	0.00159154	0.0182393
CFL2	3441.86	-0.134204	0.0808072	-1.66079	0.096755	0.256113
CFLAR	447.549	0.142182	0.109036	1.30399	0.192238	0.38263
CGGBP1	2961.69	4.83107e-05	0.0973163	0.00049643	0.999604	0.999789
CGN	891.239	0.100331	0.0962307	1.04261	0.297129	0.499089
CGRRF1	373.75	0.271512	0.116351	2.33356	0.0196187	0.103003
CH17-340M24.3	106.624	-0.17895	0.21912	-0.816676	0.414114	0.606602
CHAC1	140.392	-0.148979	0.217542	-0.684827	0.493453	0.675904
CHAC2	751.343	-0.00301559	0.133131	-0.0226513	0.981928	0.991803
CHAF1A	4612.74	0.203456	0.0663875	3.06467	0.00217908	0.0226978
CHAF1B	1993.37	0.0288909	0.0809259	0.357004	0.721089	0.842173
CHCHD1	1775.46	-0.225749	0.140626	-1.60532	0.108423	0.274145
CHCHD10	7127.22	-0.294797	0.164224	-1.79509	0.0726388	0.2182
CHCHD2	19732.9	-0.312223	0.131171	-2.38027	0.0173001	0.0954577
CHCHD3	3436.64	-0.142297	0.0853296	-1.66762	0.0953921	0.253626
CHCHD4	1392.02	-0.0713388	0.118752	-0.600735	0.548017	0.718081
CHCHD5	761.76	-0.262205	0.182841	-1.43406	0.151555	0.333383
CHCHD6	1163.34	-0.160036	0.113948	-1.40447	0.160179	0.343551
CHCHD7	2297.53	-0.158169	0.106328	-1.48757	0.136865	0.313099
CHD1	1733.64	0.39771	0.16644	2.38951	0.0168706	0.0943062
CHD1L	4119.27	0.110823	0.0707077	1.56734	0.117036	0.286453
CHD2	1424.16	0.582762	0.125962	4.6265	3.71891e-06	0.000123021
CHD3	4024.92	-0.00654285	0.102288	-0.0639651	0.948998	0.975752
CHD4	10004.2	-0.0101685	0.130256	-0.0780654	0.937776	0.969977
CHD6	953.56	0.536995	0.194224	2.76482	0.00569545	0.0450622
CHD7	1427.82	0.329367	0.169406	1.94425	0.0518655	0.180193
CHD8	3345.17	0.258089	0.1344	1.92031	0.0548188	0.185784
CHD9	509.79	0.753763	0.222183	3.39254	0.000692484	0.00967324
CHDH	342.164	0.348901	0.203079	1.71806	0.0857859	0.238794
CHEK1	1893.42	0.0653328	0.0677356	0.964527	0.334782	0.536306
CHEK2	1636.68	-0.0225814	0.106512	-0.212008	0.832101	0.911095
CHERP	4438.56	0.165406	0.0817127	2.02424	0.0429458	0.160355
CHFR	808.095	0.147021	0.096362	1.52572	0.12708	0.298897
CHIC2	235.337	0.159629	0.143701	1.11084	0.266639	0.464982
CHID1	2484.67	-0.114761	0.0738227	-1.55455	0.120053	0.29013
CHKA	1785.78	0.0394734	0.0861983	0.457937	0.646998	0.791517
CHKB	103.162	0.14274	0.207911	0.686546	0.492369	0.674676
CHKB-AS1	88.0369	-0.055954	0.196772	-0.284359	0.776135	0.877045
CHM	552.018	0.198352	0.210725	0.941282	0.346561	0.546609
CHML	1338.49	0.0816475	0.153952	0.530345	0.595873	0.753152
CHMP1A	4397.41	-0.176064	0.0815684	-2.15849	0.0308901	0.134103
CHMP1B	907.389	-0.0531215	0.0855665	-0.620821	0.534717	0.70886
CHMP2A	1948.59	-0.281888	0.159462	-1.76774	0.077104	0.22577
CHMP2B	1331.83	-0.0392208	0.115695	-0.339003	0.734608	0.850914
CHMP4A	1057.04	-0.00588635	0.13048	-0.0451129	0.964017	0.982753
CHMP4B	3805.89	-0.197738	0.115427	-1.7131	0.086694	0.23972
CHMP4C	155.218	0.00322443	0.148965	0.0216456	0.982731	0.992115
CHMP5	2332.11	-0.144936	0.0725239	-1.99845	0.0456678	0.16621
CHMP6	1006.75	-0.0474659	0.0886926	-0.535173	0.59253	0.750774
CHMP7	1679.7	0.0893083	0.0668634	1.33568	0.181653	0.370731
CHN1	940.635	0.0409051	0.0827454	0.494349	0.62106	0.771958
CHORDC1	2977.89	0.0649737	0.125455	0.517904	0.604525	0.760168
CHP1	2072.97	-0.12699	0.0723785	-1.75452	0.0793406	0.229386
CHPF	2694.98	-0.24695	0.0703256	-3.51152	0.00044555	0.00677689
CHPF2	1834.99	-0.0885633	0.0912683	-0.970363	0.331866	0.533836
CHPT1	2611.54	-0.183401	0.0988621	-1.85512	0.0635797	0.202494
CHRAC1	1654.41	-0.178823	0.0754146	-2.3712	0.0177304	0.096519
CHRD	125.632	0.040958	0.165868	0.246931	0.804961	0.895287
CHRDL1	185.884	-0.273437	0.164579	-1.66143	0.0966262	0.256083
CHRNA5	1310.75	-0.0118386	0.0701661	-0.168722	0.866015	0.930151
CHRNB1	166.221	0.134722	0.174495	0.772067	0.440075	0.628606
CHST10	1186.73	-0.00589749	0.0752258	-0.0783972	0.937512	0.969797
CHST11	525.798	-0.0570496	0.112397	-0.507573	0.611753	0.765419
CHST12	964.849	-0.14931	0.0783084	-1.90669	0.0565603	0.189013
CHST14	1030.04	-0.255057	0.107956	-2.3626	0.0181474	0.0981454
CHST15	402.671	-0.0420402	0.131564	-0.319543	0.749315	0.861381
CHST2	317.513	-0.00878813	0.1268	-0.0693069	0.944745	0.973475
CHST3	516.368	0.177773	0.115835	1.53471	0.124855	0.296051
CHST6	224.31	0.00523082	0.132449	0.0394932	0.968497	0.985712
CHST7	147.706	-0.144245	0.17333	-0.832194	0.405299	0.600048
CHST8	169.079	-0.168487	0.147493	-1.14234	0.253312	0.449887
CHSY1	1160.17	0.0737129	0.151943	0.485134	0.627581	0.777465
CHTF18	2952.68	0.193298	0.0912826	2.11758	0.0342108	0.141623
CHTF8	4892.69	0.0273274	0.0597597	0.457288	0.647464	0.791818
CHTOP	7868.56	0.12225	0.0989408	1.23558	0.216614	0.409823
CHUK	1670.37	0.0999511	0.13977	0.715114	0.474539	0.659292
CHURC1	1309.97	-0.132944	0.097091	-1.36927	0.170915	0.357427
CIAO1	5241.71	-0.0962509	0.062149	-1.54871	0.121451	0.292024
CIAPIN1	4496.4	-0.173434	0.0986048	-1.75888	0.078598	0.228218
CIB1	2922.26	-0.2895	0.128464	-2.25354	0.0242248	0.116587
CIB2	679.485	-0.20721	0.121243	-1.70904	0.0874438	0.24099
CIC	2111.66	0.312535	0.138934	2.24953	0.0244791	0.116969
CIDECP	301.789	0.391565	0.17402	2.25011	0.0244418	0.116939
CILP2	221.804	-0.118802	0.147748	-0.804087	0.421347	0.613603
CINP	1409.37	-0.208543	0.116504	-1.79	0.0734534	0.219716
CIPC	1024.5	0.168041	0.10923	1.53841	0.123947	0.294546
CIR1	724.218	0.149894	0.15878	0.944036	0.345151	0.545357
CIRBP	4966.92	-0.070671	0.109166	-0.647372	0.517391	0.694562
CIRBP-AS1	431.959	-0.16837	0.19524	-0.862374	0.388482	0.586338
CIRH1A	4579.89	-0.0108253	0.0641743	-0.168685	0.866044	0.930151
CISD1	1941.76	-0.222464	0.103673	-2.14583	0.0318869	0.136456
CISD2	1845.7	-0.212461	0.102547	-2.07185	0.0382794	0.150439
CISD3	1749.85	-0.287334	0.130283	-2.20546	0.0274222	0.124842
CISH	137.357	0.26227	0.157205	1.66834	0.0952488	0.253423
CIT	1238.87	0.322419	0.128643	2.50631	0.0121997	0.0762235
CITED1	15704.7	-0.187948	0.14535	-1.29307	0.195986	0.386949
CITED2	1649.39	0.758447	0.110109	6.88815	5.65231e-12	6.77272e-10
CITED4	124.929	-0.036243	0.269121	-0.134672	0.892872	0.946501
CIZ1	5845.93	-0.117559	0.0615311	-1.91057	0.0560597	0.18804
CKAP2	3376.67	0.0818612	0.142165	0.575818	0.564738	0.730934
CKAP2L	746.428	0.359155	0.117072	3.06781	0.0021563	0.0225325
CKAP4	5066.81	-0.196598	0.0572338	-3.435	0.000592562	0.00848631
CKAP5	7270.08	0.13026	0.116448	1.11861	0.263305	0.461029
CKB	60849.3	-0.260758	0.123449	-2.11227	0.0346637	0.142351
CKLF	423.787	-0.254182	0.201408	-1.26202	0.20694	0.399292
CKMT1A	465.232	-0.283071	0.180411	-1.56903	0.11664	0.286007
CKMT1B	793.191	-0.577358	0.206005	-2.80264	0.00506855	0.0412834
CKS1B	961.809	-0.341721	0.24361	-1.40273	0.160696	0.344248
CKS2	4918.26	-0.136165	0.110258	-1.23496	0.216844	0.41011
CLASP1	1178.41	0.338497	0.151714	2.23115	0.0256713	0.12026
CLASP2	1770.44	0.103509	0.167208	0.619042	0.535889	0.709257
CLASRP	2113.59	0.438593	0.082139	5.33964	9.31318e-08	4.48363e-06
CLCC1	1788.77	-0.0178571	0.0771272	-0.231527	0.816905	0.901973
CLCN2	601.793	0.350998	0.096329	3.64374	0.000268701	0.00449949
CLCN3	1634.29	0.120143	0.174042	0.690309	0.49	0.672627
CLCN5	829.527	-0.0283388	0.112203	-0.252567	0.800603	0.892839
CLCN6	686.856	0.85268	0.106358	8.01708	1.0829e-15	2.5951e-13
CLCN7	3404.94	-0.147052	0.0815977	-1.80216	0.0715207	0.216174
CLDN12	887.139	-0.0553576	0.172475	-0.32096	0.74824	0.860696
CLDN15	747.102	0.251927	0.11781	2.13843	0.0324822	0.137855
CLDND1	1455.62	-0.359808	0.0979547	-3.67321	0.000239525	0.00410658
CLEC11A	372.777	-0.352288	0.192369	-1.83131	0.0670539	0.208964
CLEC16A	1054.15	0.07673	0.0969575	0.791378	0.428723	0.619546
CLEC2D	116.208	0.0458856	0.206244	0.222482	0.823939	0.906207
CLGN	328.362	-0.145858	0.127743	-1.1418	0.253535	0.450136
CLIC1	7039.47	-0.266336	0.0951532	-2.79902	0.0051258	0.0416868
CLIC4	2725.92	-0.0126526	0.153045	-0.0826725	0.934112	0.968137
CLINT1	3722.59	0.0486932	0.168515	0.288954	0.772616	0.875015
CLIP1	687.696	0.14886	0.168302	0.884481	0.376436	0.574429
CLIP2	199.722	0.148279	0.146985	1.0088	0.31307	0.51476
CLIP4	226.673	0.164754	0.218913	0.752601	0.45169	0.637661
CLK1	1168.13	0.479735	0.102051	4.70093	2.58976e-06	9.12678e-05
CLK2	3467.21	0.475171	0.117304	4.05076	5.1052e-05	0.00116889
CLK3	1376.62	0.266227	0.098514	2.70243	0.00688351	0.051336
CLK4	550.779	0.595576	0.101067	5.89285	3.79585e-09	2.60729e-07
CLMN	340.914	0.148637	0.153592	0.96774	0.333174	0.535249
CLN3	1863.58	-0.240501	0.108032	-2.22621	0.0260004	0.121275
CLN5	1664.4	-0.075239	0.0709645	-1.06023	0.289038	0.490401
CLN6	5991.04	-0.242571	0.10401	-2.33219	0.0196909	0.103281
CLN8	509.359	0.000126049	0.159541	0.000790073	0.99937	0.99974
CLNS1A	6346.59	-0.131905	0.108205	-1.21903	0.222834	0.417122
CLOCK	476.391	0.253938	0.121112	2.09673	0.0360179	0.145912
CLP1	1192.16	0.0157328	0.0863122	0.182278	0.855364	0.924644
CLPB	1342.71	-0.028352	0.153569	-0.18462	0.853527	0.923901
CLPP	5363.53	-0.30379	0.117022	-2.59601	0.00943141	0.0640481
CLPTM1	5788.86	-0.21678	0.0606143	-3.57638	0.00034839	0.00549275
CLPTM1L	6432.59	-0.0932012	0.0644283	-1.44659	0.148012	0.328293
CLPX	904.69	0.272729	0.114261	2.38689	0.0169914	0.0945975
CLSPN	1837.61	0.253947	0.137651	1.84487	0.0650571	0.205019
CLSTN1	4915.92	-0.0801483	0.0783524	-1.02292	0.306345	0.507158
CLSTN3	746.903	-0.0553975	0.150907	-0.367097	0.713546	0.836473
CLTA	7684.84	-0.233842	0.125665	-1.86083	0.0627677	0.200559
CLTB	5797.79	-0.358403	0.117213	-3.05771	0.00223037	0.0230607
CLTC	11681.9	0.00503404	0.126059	0.039934	0.968146	0.98554
CLTCL1	868.068	0.55517	0.0960055	5.78269	7.35169e-09	4.63629e-07
CLU	718.151	-0.284692	0.145492	-1.95675	0.0503766	0.176728
CLUAP1	506.16	0.238858	0.132152	1.80745	0.0706921	0.214699
CLUH	6288.5	0.0685569	0.136679	0.501592	0.615955	0.768003
CLYBL	100.269	0.0830458	0.223659	0.371306	0.71041	0.83455
CMAS	2344.95	-0.108791	0.0967301	-1.12468	0.260723	0.45822
CMBL	817.902	-0.232881	0.0813122	-2.86404	0.00418274	0.0362303
CMC1	653.239	-0.14382	0.188131	-0.764467	0.444589	0.632661
CMC2	1582.89	-0.199636	0.168818	-1.18255	0.236987	0.432145
CMC4	1003.58	-0.272332	0.170311	-1.59903	0.109814	0.275852
CMPK1	2026.75	-0.20271	0.0756215	-2.68059	0.00734926	0.0535154
CMSS1	2875.59	-0.181743	0.12519	-1.45174	0.146575	0.326583
CMTM3	912.716	-0.216183	0.100969	-2.14109	0.0322668	0.137333
CMTM4	1409	-0.00509536	0.135162	-0.037698	0.969928	0.986554
CMTM6	2434.06	-0.209678	0.102793	-2.0398	0.04137	0.156869
CMTM7	1671.73	-0.271761	0.158374	-1.71594	0.0861723	0.239259
CMTM8	386.323	-0.114435	0.123163	-0.929135	0.352819	0.552702
CMTR1	4375.32	0.0714589	0.0863727	0.827333	0.408049	0.601887
CMTR2	265.402	0.272926	0.17844	1.52951	0.126137	0.297716
CNBP	14721.5	-0.108146	0.0782703	-1.38169	0.167066	0.352847
CNDP2	2232.64	-0.0801489	0.0625757	-1.28083	0.200253	0.391679
CNFN	181.897	-0.283372	0.234534	-1.20824	0.226956	0.421401
CNIH1	2691.34	-0.230818	0.0967647	-2.38536	0.0170626	0.0946527
CNIH2	102.393	-0.164773	0.251508	-0.65514	0.512377	0.689909
CNIH4	2963.4	-0.314853	0.115865	-2.71742	0.00657931	0.0497206
CNKSR3	628.66	0.502211	0.102172	4.91536	8.8619e-07	3.51348e-05
CNN2	2530.5	-0.23599	0.0799976	-2.94996	0.00317814	0.0296693
CNN3	5098	-0.100256	0.0723019	-1.38663	0.165553	0.350892
CNNM1	346.703	0.261132	0.141205	1.84931	0.0644135	0.203798
CNNM2	554.082	0.115697	0.108522	1.06612	0.28637	0.487715
CNNM3	2408.01	0.0494879	0.0871547	0.567817	0.570159	0.734656
CNNM4	1112.21	0.0784525	0.101721	0.77125	0.440559	0.629103
CNOT1	8624.72	0.099795	0.135521	0.736379	0.4615	0.647315
CNOT10	2171.39	0.113017	0.0706703	1.59922	0.109772	0.275827
CNOT11	3366.09	-0.0570459	0.0595405	-0.958103	0.338011	0.53918
CNOT2	1796.18	0.163272	0.0883351	1.84833	0.0645546	0.203912
CNOT3	4239.99	0.0729843	0.0618379	1.18025	0.2379	0.433071
CNOT4	1067.13	0.640907	0.120484	5.31942	1.04099e-07	4.90221e-06
CNOT6	2658.16	0.0963363	0.116424	0.827464	0.407974	0.601859
CNOT6L	703.886	0.215218	0.140869	1.52779	0.126565	0.298399
CNOT7	2719.26	-0.118113	0.0618805	-1.90873	0.0562966	0.188541
CNOT8	1935.42	-0.0358391	0.0648656	-0.552512	0.580597	0.742372
CNP	4092.26	-0.201319	0.0863309	-2.33195	0.0197034	0.103297
CNPPD1	1397.81	-0.0695967	0.100078	-0.695425	0.486789	0.670366
CNPY1	168.672	-0.163652	0.206368	-0.793014	0.427769	0.61912
CNPY2	4867.59	-0.25118	0.11764	-2.13515	0.0327484	0.138465
CNPY3	1761.24	-0.206596	0.13219	-1.56287	0.118083	0.287646
CNPY4	381.833	-0.0207286	0.126976	-0.163249	0.870323	0.93225
CNRIP1	369.251	-0.210827	0.157778	-1.33623	0.181475	0.370557
CNST	357.923	0.324746	0.135705	2.39302	0.0167104	0.0940034
CNTFR	225.875	-0.233016	0.134862	-1.72782	0.0840214	0.236146
CNTLN	614.884	0.150316	0.107851	1.39374	0.163395	0.347901
CNTN1	279.608	0.0498633	0.214984	0.23194	0.816584	0.901973
CNTNAP2	801.996	-0.10001	0.103088	-0.970143	0.331975	0.533933
CNTRL	346.474	0.54023	0.175752	3.07382	0.00211335	0.0221912
CNTROB	1921.53	0.204938	0.0629635	3.25487	0.00113445	0.0139977
COA1	2600.3	-0.209092	0.105131	-1.98887	0.0467154	0.168601
COA3	3622.4	-0.301052	0.153905	-1.95609	0.0504543	0.176885
COA4	4674.18	-0.200545	0.131031	-1.53052	0.125888	0.297452
COA5	908.589	-0.14413	0.114171	-1.2624	0.206805	0.399103
COA6	2546.18	-0.0830113	0.119745	-0.693236	0.488161	0.6713
COA7	1459.47	0.320382	0.100411	3.19072	0.0014192	0.0168368
COASY	4161.3	-0.00697836	0.0925576	-0.0753948	0.939901	0.970778
COBL	470.588	0.170211	0.149634	1.13752	0.255321	0.451695
COCH	2229.33	-0.234048	0.0743641	-3.14733	0.00164772	0.0186578
COG1	1335.74	0.218269	0.0787003	2.77342	0.00554705	0.0440821
COG2	2595.54	0.0824778	0.0601601	1.37097	0.170384	0.356988
COG3	505.596	0.595684	0.134939	4.41448	1.01253e-05	0.000288104
COG4	1883.52	-0.0757629	0.0869986	-0.870851	0.383835	0.581605
COG5	866.231	0.105693	0.123842	0.853454	0.393408	0.590294
COG6	485.419	0.0419135	0.157218	0.266594	0.789782	0.885938
COG7	849.826	0.0518848	0.0811685	0.639224	0.522677	0.700019
COG8	1010.19	0.107323	0.128441	0.835585	0.403389	0.598539
COIL	2339.35	0.178254	0.0681537	2.61547	0.0089104	0.0613944
COL13A1	187.376	-0.106072	0.141454	-0.749868	0.453334	0.639088
COL18A1	1869.88	-0.0922218	0.121495	-0.759058	0.447818	0.634693
COL1A1	670.057	-0.0570735	0.132372	-0.431161	0.666351	0.804786
COL25A1	165.763	0.332655	0.281617	1.18123	0.237511	0.432728
COL26A1	220.992	-0.333481	0.144736	-2.30406	0.0212194	0.107939
COL27A1	549.068	0.255282	0.131906	1.93533	0.0529502	0.182491
COL2A1	1278.47	-0.115485	0.0805511	-1.43369	0.151662	0.333383
COL4A1	615.79	-0.107197	0.184344	-0.581506	0.560899	0.728676
COL4A2	1939.94	-0.10672	0.119122	-0.895891	0.370311	0.569863
COL4A3BP	642.682	0.108986	0.182909	0.595845	0.551279	0.720743
COL4A5	1136.34	-0.0527501	0.183073	-0.288137	0.773242	0.87554
COL4A6	598.996	0.0822334	0.119209	0.689824	0.490305	0.672869
COL5A1	410.377	-0.0593975	0.139229	-0.426616	0.669659	0.807515
COL6A1	3215.94	-0.0739519	0.0859588	-0.860319	0.389613	0.587471
COL6A2	792.495	-0.0628636	0.101817	-0.617418	0.536959	0.709976
COL7A1	213.346	0.182443	0.137331	1.32849	0.184015	0.37364
COL9A2	139.969	0.0375014	0.187923	0.199558	0.841827	0.91725
COL9A3	115.207	0.040598	0.223018	0.182039	0.855552	0.924754
COLEC12	610.773	-0.0765957	0.115791	-0.661497	0.508293	0.687155
COLGALT1	6677.23	-0.116589	0.0775888	-1.50265	0.132929	0.307651
COLQ	148.723	0.375759	0.153637	2.44575	0.014455	0.0847706
COMMD1	591.491	-0.334771	0.165264	-2.02567	0.0427986	0.159882
COMMD10	334.152	-0.174056	0.114764	-1.51664	0.129358	0.302012
COMMD2	1811.06	-0.0221043	0.0681567	-0.324315	0.745699	0.859791
COMMD3	1051.18	-0.242799	0.133001	-1.82554	0.0679195	0.210291
COMMD4	5486.53	-0.268416	0.143522	-1.87021	0.0614552	0.198189
COMMD5	1557.6	-0.159569	0.118217	-1.34979	0.177082	0.365135
COMMD6	2005.49	-0.192076	0.165698	-1.15919	0.246378	0.441498
COMMD7	1137.57	-0.19458	0.121117	-1.60655	0.108153	0.273592
COMMD8	800.472	-0.214981	0.153897	-1.39692	0.162438	0.346946
COMMD9	2905.67	-0.22905	0.101135	-2.26479	0.0235254	0.114848
COMT	3496.26	-0.271572	0.105563	-2.5726	0.0100937	0.0673167
COMTD1	1019.75	-0.00851287	0.1549	-0.0549572	0.956173	0.978638
COPA	6125.67	0.068803	0.121804	0.564866	0.572165	0.735707
COPB1	4546.06	-0.0296465	0.085919	-0.345052	0.730055	0.847709
COPB2	6615.85	-0.0370375	0.0699207	-0.529706	0.596316	0.753623
COPE	9518.92	-0.31327	0.113107	-2.76969	0.00561098	0.0444918
COPG1	4693.3	-0.0131151	0.0763276	-0.171826	0.863574	0.929038
COPG2	2079.06	-0.0539062	0.0781667	-0.689632	0.490426	0.672869
COPRS	3466.05	-0.255468	0.156147	-1.63608	0.101824	0.264901
COPS2	2525.69	-0.0187641	0.10265	-0.182797	0.854957	0.924574
COPS3	6385.63	-0.0965648	0.0997629	-0.967943	0.333073	0.535249
COPS4	2642.21	-0.150935	0.067165	-2.24723	0.0246255	0.117185
COPS5	3051.03	-0.151688	0.113414	-1.33748	0.181068	0.370051
COPS6	7322.62	-0.246209	0.114091	-2.15801	0.0309267	0.134103
COPS7A	3345.37	-0.188809	0.0771967	-2.44582	0.0144523	0.0847706
COPS7B	3269.39	-0.125907	0.0908007	-1.38663	0.165555	0.350892
COPS8	3379.26	-0.214971	0.0797778	-2.69462	0.00704694	0.052158
COPZ1	8760.82	-0.250357	0.0931013	-2.68908	0.00716484	0.0526333
COQ10A	758.249	-0.0419198	0.121491	-0.345045	0.730061	0.847709
COQ10B	438.972	0.119387	0.120045	0.994522	0.319969	0.521703
COQ2	1015.14	-0.0407134	0.08591	-0.473908	0.635566	0.782503
COQ3	1478.61	-0.188343	0.125521	-1.50049	0.133487	0.308017
COQ4	1944.78	-0.106333	0.115908	-0.917392	0.358937	0.55928
COQ5	885.267	-0.0401383	0.140554	-0.285572	0.775206	0.876568
COQ6	881.447	0.0247764	0.128085	0.193438	0.846616	0.919672
COQ7	1148.27	-0.0637523	0.0893193	-0.713758	0.475377	0.659862
COQ9	2713.33	-0.1107	0.114642	-0.96561	0.334239	0.535863
CORO1A	269.664	-0.167347	0.186427	-0.897652	0.369371	0.569042
CORO1B	2716.65	-0.189481	0.0687404	-2.75647	0.00584293	0.0457891
CORO1C	4594	-0.040902	0.0881314	-0.464103	0.642574	0.788431
CORO2A	280.919	0.0340978	0.138036	0.247021	0.804892	0.895287
CORO6	363.407	0.135669	0.152317	0.890702	0.373089	0.571748
CORO7	609.905	-0.215659	0.206224	-1.04575	0.295676	0.497825
COTL1	4786.89	-0.254731	0.0980418	-2.59819	0.00937177	0.0636831
COX10	935.658	0.0672873	0.077094	0.872796	0.382774	0.580568
COX11	2615.63	-0.184622	0.0881182	-2.09517	0.0361561	0.146252
COX14	1539.14	-0.362192	0.174485	-2.07578	0.0379144	0.149659
COX15	2571.97	-0.109146	0.0596887	-1.82859	0.0674606	0.209653
COX16	887.182	-0.196013	0.143909	-1.36207	0.173177	0.360158
COX17	1343.03	-0.219148	0.16425	-1.33423	0.182127	0.371425
COX18	763.354	0.170167	0.100194	1.69837	0.0894384	0.24424
COX19	597.153	0.633517	0.11048	5.73419	9.79772e-09	5.8419e-07
COX20	1230.65	-0.104814	0.135515	-0.773447	0.439258	0.628327
COX4I1	16823.6	-0.34169	0.148607	-2.29928	0.0214891	0.108528
COX5A	9921.86	-0.231243	0.139479	-1.65791	0.0973364	0.257273
COX5B	8097.8	-0.311574	0.1435	-2.17125	0.0299126	0.131605
COX6A1	14051.1	-0.296564	0.142806	-2.07669	0.0378301	0.149428
COX6B1	8555.04	-0.281468	0.159499	-1.7647	0.0776135	0.226825
COX6C	3574.64	-0.317438	0.154665	-2.05242	0.0401285	0.154552
COX7A2	6219.2	-0.318261	0.158084	-2.01324	0.0440891	0.162772
COX7A2L	3163.13	-0.212465	0.11756	-1.80729	0.0707168	0.214699
COX7B	8757.32	-0.260918	0.148936	-1.75188	0.0797938	0.230033
COX7C	11238.5	-0.303633	0.139816	-2.17166	0.0298816	0.131528
COX8A	12024.2	-0.337319	0.151388	-2.22818	0.0258688	0.120949
CPD	2510.36	0.127904	0.154293	0.828967	0.407123	0.601445
CPE	1866.42	-0.186127	0.103662	-1.79552	0.0725707	0.218178
CPEB4	380.373	0.233887	0.264936	0.882805	0.377342	0.575485
CPLX1	415.921	-0.30449	0.142709	-2.13364	0.0328719	0.138744
CPNE1	2961.14	-0.0502007	0.100583	-0.499099	0.61771	0.769161
CPNE2	974.728	-0.176634	0.109178	-1.61785	0.105694	0.270225
CPNE3	3056.8	-0.112083	0.143744	-0.779738	0.435545	0.625091
CPNE7	392.202	0.0369268	0.116978	0.315674	0.75225	0.86317
CPOX	1498.66	-0.043306	0.13745	-0.315068	0.75271	0.863277
CPPED1	537.616	-0.0614891	0.097483	-0.630767	0.528193	0.704192
CPS1	423.432	0.0962961	0.177167	0.543534	0.586762	0.747341
CPSF1	5285.18	0.0128953	0.0803378	0.160514	0.872477	0.933782
CPSF2	2634.63	0.111894	0.120653	0.927401	0.353719	0.553789
CPSF3	3796.53	-0.052302	0.0940558	-0.556074	0.57816	0.740396
CPSF3L	2673.53	0.00942379	0.0871065	0.108187	0.913847	0.957905
CPSF4	2128.24	0.0130438	0.104607	0.124693	0.900766	0.951156
CPSF6	5236.11	-0.0345869	0.083748	-0.412988	0.679616	0.81415
CPSF7	5671.48	0.186251	0.0857863	2.1711	0.0299235	0.131605
CPT1A	412.521	0.0674657	0.15735	0.428761	0.668097	0.806298
CPT1C	273.916	-0.253098	0.199142	-1.27094	0.203751	0.395473
CPT2	1259.29	0.0739355	0.100164	0.738147	0.460425	0.646261
CPTP	992.214	-0.179232	0.0968976	-1.84971	0.0643558	0.203702
CPVL	2162.71	-0.220024	0.0657937	-3.34414	0.000825374	0.0109079
CRABP2	1374.23	-0.246291	0.157081	-1.56793	0.116898	0.286246
CRACR2A	109.173	0.184781	0.213873	0.863973	0.387603	0.585339
CRADD	361.334	-0.00853508	0.102902	-0.0829441	0.933896	0.968137
CRAMP1L	1379.16	0.479227	0.181411	2.64166	0.00825	0.0580155
CRAT	952.148	-0.203726	0.0881363	-2.31149	0.0208059	0.106539
CRBN	648.101	-0.0207608	0.0917659	-0.226237	0.821017	0.904654
CRCP	1246.66	0.437775	0.124661	3.51173	0.000445196	0.00677689
CREB1	1029.09	0.324288	0.143783	2.2554	0.0241083	0.11633
CREB3	1443.17	-0.179048	0.103934	-1.72271	0.0849419	0.237594
CREB3L2	2291.85	0.107381	0.140931	0.761938	0.446097	0.633754
CREB3L4	312.343	-0.0120246	0.145114	-0.0828633	0.93396	0.968137
CREB5	651.681	0.489703	0.181604	2.69654	0.00700642	0.0519294
CREBBP	2975.71	0.272187	0.189426	1.43691	0.150744	0.332439
CREBL2	503.946	-0.0525063	0.107307	-0.489309	0.624623	0.775047
CREBZF	3186.54	0.357902	0.143486	2.49434	0.0126192	0.0780755
CREG1	2428.9	-0.146751	0.0825783	-1.77711	0.0755502	0.222787
CRELD1	425.892	0.0123821	0.119905	0.103266	0.917752	0.960411
CRELD2	2378.63	-0.256711	0.0989178	-2.5952	0.00945367	0.0641588
CREM	632.639	0.012276	0.139255	0.0881548	0.929754	0.966448
CRIM1	591.554	0.194601	0.2274	0.855765	0.392128	0.589696
CRIP2	191.461	-0.285361	0.200954	-1.42003	0.155598	0.337416
CRIP3	144.074	-0.416371	0.182033	-2.28733	0.0221764	0.110669
[truncated: 8,785 more rows]

## Sheet: All bakR scores
external_gene_name	bakR_score	DE_score	Mech_score	X..chrom.	chromStart	chromEnd	clusterId	transcript	ensembl_gene_id_version	ensembl_gene_id	chromosome_name	start_position	end_position	baseMean	log2FoldChange	lfcSE	stat	pvalue	padj
ZNF574	-5.01449	2.08288	-3.44664	chr19	42076165	42081552	3188	ENST00000359044.5	ENSG00000105732.13	ENSG00000105732	19	42068477	42081552	1721.57	0.841985	0.0874463	9.62859	6.0552e-22	2.7208e-19
BRF2	-3.42238	2.41309	-3.18297	chr8	37843267	37849861	2893	ENST00000220659.11	ENSG00000104221.13	ENSG00000104221	8	37843268	37849861	879.697	1.06351	0.0953388	11.1551	6.76382e-29	6.07842e-26
ZNF526	-5.06085	1.71806	-3.15675	chr19	42220311	42228201	12150	ENST00000301215.8	ENSG00000167625.12	ENSG00000167625	19	42220292	42228201	938.88	0.975206	0.122789	7.94214	1.98729e-15	4.30145e-13
ZNF57	-3.44377	2.12561	-2.94938	chr19	2900927	2918473	13201	ENST00000306908.10	ENSG00000171970.14	ENSG00000171970	19	2900928	2918473	382.222	1.10788	0.112748	9.82609	8.69274e-23	4.26102e-20
DDIT4	-3.87387	1.84431	-2.85969	chr10	72273923	72276036	12310	ENST00000307365.4	ENSG00000168209.6	ENSG00000168209	10	72273919	72276036	1165.8	0.756893	0.0887774	8.52574	1.51832e-17	4.42529e-15
MAP3K14	-2.49576	2.39314	-2.85179	chr17	45263118	45317020	122	ENST00000344686.8	ENSG00000006062.18	ENSG00000006062	17	45263119	45317029	486.568	1.22056	0.11033	11.0628	1.90011e-28	1.57622e-25
MAP3K14	-2.49576	2.39314	-2.85179	chr17_KI270908v1_alt	7462	7543	61283	ENST00000634016.1	ENSG00000282637.1	ENSG00000282637	HSCHR17_2_CTG5	7463	7543	486.568	1.22056	0.11033	11.0628	1.90011e-28	1.57622e-25
RND3	-3.98134	1.68968	-2.76662	chr2	150468194	150487667	4516	ENST00000263895.9	ENSG00000115963.14	ENSG00000115963	2	150468195	150539011	996.841	0.755385	0.0967089	7.81092	5.67732e-15	1.09329e-12
SNAI2	-2.24718	2.36637	-2.74501	chr8	48917597	48921429	393	ENST00000020945.4	ENSG00000019549.13	ENSG00000019549	8	48917598	48921740	1496.93	1.25868	0.115062	10.9391	7.49457e-28	5.3881e-25
EPC1	-2.89548	2.06615	-2.71351	chr10	32267750	32347158	5074	ENST00000319778.11	ENSG00000120616.16	ENSG00000120616	10	32267751	32378798	1103.94	1.04474	0.109383	9.55124	1.28158e-21	5.3156e-19
ZNF555	-3.43965	1.73703	-2.62246	chr19	2841474	2860471	16220	ENST00000334241.9	ENSG00000186300.12	ENSG00000186300	19	2841437	2860471	254.224	1.08987	0.135728	8.02983	9.76071e-16	2.39226e-13
MED26	-2.96101	1.87189	-2.573	chr19	16574918	16628204	3035	ENST00000263390.8	ENSG00000105085.11	ENSG00000105085	19	16574907	16629062	887.54	0.647105	0.074782	8.65322	5.00668e-18	1.588e-15
TRIB1	-2.12422	2.19737	-2.5617	chr8	125430357	125438403	13505	ENST00000311922.4	ENSG00000173334.4	ENSG00000173334	8	125430358	125438403	2731.08	0.941836	0.0927203	10.1578	3.05838e-24	1.83231e-21
ZNF202	-2.10985	2.19447	-2.55439	chr11	123723913	123741660	11813	ENST00000530393.6	ENSG00000166261.11	ENSG00000166261	11	123723914	123741675	851.09	0.739697	0.0729166	10.1444	3.50854e-24	1.99137e-21
ZNF416	-2.98221	1.84015	-2.55361	chr19	57571565	57578911	1610	ENST00000196489.4	ENSG00000083817.9	ENSG00000083817	19	57571566	57578911	253.429	1.06268	0.124925	8.5065	1.79264e-17	4.95689e-15
ZNF16	-3.128	1.66229	-2.45409	chr8	144930357	144950880	12882	ENST00000394909.7	ENSG00000170631.15	ENSG00000170631	8	144930358	144950888	630.631	1.11083	0.144559	7.6843	1.53841e-14	2.76504e-12
ZNF324	-3.12972	1.65817	-2.45122	chr19	58467079	58475436	1608	ENST00000196482.4	ENSG00000083812.13	ENSG00000083812	19	58467056	58475436	737.036	0.828058	0.108027	7.66529	1.78433e-14	3.10358e-12
TICRR	-3.79092	1.38612	-2.4477	chr15	89575468	89628023	8000	ENST00000268138.12	ENSG00000140534.14	ENSG00000140534	15	89575469	89631056	1926.98	1.17832	0.183894	6.40763	1.47795e-10	1.35069e-08
CCNL1	-3.11941	1.63771	-2.43058	chr3	157147552	157160147	11100	ENST00000295926.8	ENSG00000163660.12	ENSG00000163660	3	157146508	157160760	1677.9	0.699484	0.0923937	7.57069	3.71249e-14	6.25554e-12
ZNF3	-2.874	1.73259	-2.42678	chr7	100069972	100081723	11890	ENST00000299667.9	ENSG00000166526.19	ENSG00000166526	7	100064033	100082548	1399.42	0.600231	0.0749421	8.00927	1.15395e-15	2.70525e-13
HOXA5	-1.96893	2.0715	-2.40355	chr7	27141051	27143681	3243	ENST00000222726.4	ENSG00000106004.5	ENSG00000106004	7	27141052	27143681	3251.88	0.961136	0.10037	9.57595	1.00923e-21	4.35341e-19
RASSF1	-2.21937	1.9595	-2.39472	chr3	50329787	50340836	1031	ENST00000359365.9	ENSG00000068028.18	ENSG00000068028	3	50329782	50340980	1694.28	0.821127	0.0906497	9.05824	1.32571e-19	4.92982e-17
ZNF503	-2.65715	1.78214	-2.3947	chr10	75397829	75401764	11659	ENST00000372524.5	ENSG00000165655.17	ENSG00000165655	10	75397830	75401764	6257.15	1.10057	0.133592	8.23834	1.7462e-16	4.48357e-14
MYC	-1.7176	2.13075	-2.36789	chr8	127736230	127742951	7397	ENST00000621592.8	ENSG00000136997.22	ENSG00000136997	8	127735434	127742951	8599.66	0.977637	0.099254	9.84985	6.86467e-23	3.52517e-20
ZKSCAN4	-3.99809	1.19779	-2.36024	chr6	28241696	28252269	16505	ENST00000377294.3	ENSG00000187626.9	ENSG00000187626	6	28241697	28252269	430.939	0.768097	0.138719	5.53706	3.07599e-08	1.65857e-06
STC2	-3.42503	1.38122	-2.31943	chr5	173314722	173328414	4231	ENST00000265087.9	ENSG00000113739.11	ENSG00000113739	5	173314723	173328447	2087.58	0.518003	0.0811279	6.38502	1.71377e-10	1.55305e-08
GADD45A	-2.46692	1.72121	-2.2791	chr1	67685200	67688334	4614	ENST00000370986.9	ENSG00000116717.13	ENSG00000116717	1	67685201	67688334	482.815	1.23598	0.155339	7.95667	1.76727e-15	3.97047e-13
ZNF408	-3.02047	1.49055	-2.27372	chr11	46701030	46705912	13857	ENST00000311764.3	ENSG00000175213.3	ENSG00000175213	11	46701030	46705912	1190.23	0.696813	0.101128	6.89038	5.56433e-12	6.74222e-10
ZSCAN12	-2.43092	1.72751	-2.27216	chr6	28384737	28399747	10259	ENST00000684592.1	ENSG00000158691.15	ENSG00000158691	6	28378955	28399747	495.286	1.1457	0.143467	7.98581	1.39604e-15	3.20316e-13
LRIG3	-3.32803	1.3509	-2.2611	chr12	58872154	58920504	7810	ENST00000320743.8	ENSG00000139263.12	ENSG00000139263	12	58872149	58920504	829.223	0.897725	0.143755	6.24482	4.24296e-10	3.54698e-08
ZNF561	-2.06898	1.85995	-2.26028	chr19	9607328	9621232	13074	ENST00000302851.8	ENSG00000171469.11	ENSG00000171469	19	9604680	9621236	1076.67	0.744307	0.086567	8.59804	8.10874e-18	2.49842e-15
ZNF766	-2.44504	1.70701	-2.25978	chr19	52269586	52296046	17032	ENST00000439461.6	ENSG00000196214.11	ENSG00000196214	19	52269587	52296046	304.737	0.868646	0.11008	7.89102	2.99738e-15	6.33798e-13
CITED2	-2.97338	1.49006	-2.25734	chr6	139371806	139374648	11366	ENST00000367651.4	ENSG00000164442.11	ENSG00000164442	6	139371807	139374648	1649.39	0.758447	0.110109	6.88815	5.65231e-12	6.77272e-10
HJURP	-2.74431	1.57656	-2.25206	chr2	233836701	233854535	5399	ENST00000411486.7	ENSG00000123485.12	ENSG00000123485	2	233833416	233854566	1920.45	0.538352	0.0738684	7.28799	3.14611e-13	4.64762e-11
ZNF184	-3.16595	1.40494	-2.25137	chr6	27450746	27473105	2068	ENST00000683788.1	ENSG00000096654.16	ENSG00000096654	6	27450743	27473118	372.703	0.980518	0.150973	6.49465	8.32247e-11	8.15904e-09
ZBTB49	-2.89649	1.47345	-2.21733	chr4	4290250	4321783	12458	ENST00000337872.9	ENSG00000168826.16	ENSG00000168826	4	4290251	4321786	200.969	1.22681	0.180113	6.81137	9.66765e-12	1.10911e-09
ZNF607	-3.02679	1.40144	-2.20121	chr19	37696370	37719761	17680	ENST00000355202.9	ENSG00000198182.13	ENSG00000198182	19	37696371	37719761	396.874	0.709019	0.109443	6.47845	9.26691e-11	8.92271e-09
LRIG2	-2.29022	1.6941	-2.19642	chr1	113073197	113132260	17886	ENST00000361127.6	ENSG00000198799.12	ENSG00000198799	1	113073198	113132260	641.864	1.02334	0.130673	7.83135	4.82676e-15	1.00072e-12
ZNF134	-2.66562	1.53677	-2.19202	chr19	57614241	57624724	22673	ENST00000396161.10	ENSG00000213762.12	ENSG00000213762	19	57614233	57624724	362.755	0.899075	0.126558	7.10406	1.2114e-12	1.6319e-10
CLCN6	-2.16068	1.73428	-2.18612	chr1	11806190	11843130	277	ENST00000346436.11	ENSG00000011021.23	ENSG00000011021	1	11806096	11848079	686.856	0.85268	0.106358	8.01708	1.0829e-15	2.5951e-13
ZNF79	-2.56216	1.57129	-2.18583	chr9	127424381	127445372	17009	ENST00000342483.5	ENSG00000196152.10	ENSG00000196152	9	127424374	127445372	298.571	1.17016	0.161099	7.26364	3.76824e-13	5.49144e-11
ZNF746	-3.11256	1.34547	-2.18343	chr7	149472793	149497809	15023	ENST00000458143.7	ENSG00000181220.18	ENSG00000181220	7	149472696	149497817	1968.98	0.506517	0.0814372	6.21972	4.98039e-10	3.97841e-08
C15orf39	-3.0671	1.33924	-2.16279	chr15	75201881	75212169	12047	ENST00000394987.5	ENSG00000167173.19	ENSG00000167173	15	75195643	75212169	4741.75	0.497265	0.0803213	6.19095	5.98022e-10	4.67324e-08
TIPARP	-2.39196	1.59512	-2.14803	chr3	156674589	156706770	11099	ENST00000295924.12	ENSG00000163659.13	ENSG00000163659	3	156673235	156706770	856.507	0.911495	0.123612	7.37382	1.6581e-13	2.51844e-11
KLF6	-2.14223	1.69359	-2.14577	chr10	3775995	3785209	998	ENST00000497571.6	ENSG00000067082.15	ENSG00000067082	10	3775996	3785281	608.086	1.23558	0.157821	7.82899	4.91822e-15	1.00072e-12
ZNF304	-3.22762	1.24999	-2.1425	chr19	57351270	57359898	6510	ENST00000282286.6	ENSG00000131845.15	ENSG00000131845	19	57351271	57359898	638.469	0.820986	0.142079	5.77837	7.54292e-09	4.7019e-07
ZNF485	-2.14535	1.68127	-2.13651	chr10	43606437	43617904	17711	ENST00000361807.8	ENSG00000198298.13	ENSG00000198298	10	43606419	43617904	218.42	0.985365	0.126783	7.77205	7.72266e-15	1.43588e-12
ZNF250	-1.64111	1.88208	-2.13362	chr8	144876954	144901453	17007	ENST00000417550.7	ENSG00000196150.14	ENSG00000196150	8	144876497	144902168	215.637	1.24215	0.14277	8.70035	3.30853e-18	1.08119e-15
ZNF398	-2.38697	1.56314	-2.11954	chr7	149147452	149183042	17299	ENST00000475153.6	ENSG00000197024.9	ENSG00000197024	7	149126416	149183042	1887.31	0.732937	0.101431	7.22594	4.97633e-13	7.06115e-11
CDC42EP2	-3.37039	1.14644	-2.1042	chr11	65314865	65322417	9273	ENST00000279249.3	ENSG00000149798.5	ENSG00000149798	11	65314866	65322417	1090.87	0.560268	0.105717	5.2997	1.15996e-07	5.43871e-06
ZNF317	-2.30454	1.53635	-2.06913	chr19	9140396	9163413	6350	ENST00000247956.11	ENSG00000130803.15	ENSG00000130803	19	9140397	9163424	1612.95	0.726951	0.102357	7.10214	1.22841e-12	1.6319e-10
ZNF691	-4.01868	0.837683	-2.06555	chr1	42846612	42852477	11211	ENST00000651192.1	ENSG00000164011.18	ENSG00000164011	1	42846573	42852477	735.948	0.513903	0.13271	3.87238	0.000107779	0.00216038
ZIC2	-2.05441	1.62278	-2.05665	chr13	99981783	99986765	597	ENST00000376335.8	ENSG00000043355.12	ENSG00000043355	13	99981784	99986765	3406.58	0.639448	0.0852409	7.50166	6.30129e-14	1.01423e-11
SIX1	-2.2112	1.55389	-2.05215	chr14	60643420	60649477	5860	ENST00000645694.3	ENSG00000126778.12	ENSG00000126778	14	60643421	60658259	1837.67	0.617228	0.0859265	7.1832	6.80961e-13	9.41472e-11
ZNF222	-2.9891	1.23291	-2.04724	chr19	44025378	44033110	10409	ENST00000391960.4	ENSG00000159885.14	ENSG00000159885	19	44025342	44033110	152.424	0.821361	0.144113	5.69941	1.20224e-08	7.04618e-07
IQCC	-2.6863	1.34253	-2.03631	chr1	32205670	32208682	10423	ENST00000291358.11	ENSG00000160051.12	ENSG00000160051	1	32205671	32208682	705.533	0.763414	0.12301	6.20613	5.43054e-10	4.3061e-08
ZSCAN21	-2.12961	1.56777	-2.03609	chr7	100049773	100065040	11892	ENST00000292450.9	ENSG00000166529.16	ENSG00000166529	7	100049774	100065040	787.27	0.64774	0.0893757	7.24739	4.2488e-13	6.1092e-11
PARS2	-2.41852	1.43026	-2.01894	chr1	54756897	54764523	10729	ENST00000371279.4	ENSG00000162396.6	ENSG00000162396	1	54756898	54764523	447.795	0.717124	0.108463	6.6117	3.79925e-11	3.82907e-09
ZNF92	-2.96038	1.20643	-2.01532	chr7	65373854	65401136	8893	ENST00000328747.12	ENSG00000146757.14	ENSG00000146757	7	65373799	65401136	547.987	0.637789	0.11436	5.57702	2.44679e-08	1.35314e-06
C1orf74	-1.98991	1.59635	-2.01262	chr1	209779207	209784559	10834	ENST00000294811.2	ENSG00000162757.4	ENSG00000162757	1	209779208	209784559	539.066	0.672332	0.0911079	7.37951	1.58875e-13	2.44759e-11
ZSCAN22	-2.33465	1.44639	-2.00399	chr19	58326993	58342332	15225	ENST00000329665.5	ENSG00000182318.6	ENSG00000182318	19	58326994	58342332	468.005	0.782464	0.117025	6.68628	2.28917e-11	2.42024e-09
ZNF436	-3.47071	0.97162	-1.99179	chr1	23359447	23369836	5769	ENST00000314011.9	ENSG00000125945.15	ENSG00000125945	1	23359448	23369836	342.257	0.717837	0.15982	4.49153	7.07125e-06	0.000208921
ZNF436	-3.47071	0.97162	-1.99179	chr1_KQ458383v1_alt	129426	139815	61600	ENST00000635400.2	ENSG00000283009.2	ENSG00000283009	HSCHR1_4_CTG3	129427	139815	342.257	0.717837	0.15982	4.49153	7.07125e-06	0.000208921
FNBP4	-1.80629	1.64127	-1.98794	chr11	47716493	47767341	3723	ENST00000263773.10	ENSG00000109920.13	ENSG00000109920	11	47716494	47767443	2423.85	0.75506	0.0995182	7.58715	3.27008e-14	5.59754e-12
FNBP4	-1.80629	1.64127	-1.98794	chr11_KZ559109v1_fix	148860	199708	63442	ENST00000646180.2	ENSG00000285182.2	ENSG00000285182	HG2114_PATCH	148861	199810	2423.85	0.75506	0.0995182	7.58715	3.27008e-14	5.59754e-12
ZNF557	-2.78873	1.24169	-1.9866	chr19	7069702	7087968	6291	ENST00000252840.11	ENSG00000130544.12	ENSG00000130544	19	7069703	7087968	511.819	0.786036	0.13694	5.73999	9.46841e-09	5.73637e-07
ZSCAN20	-1.64616	1.68678	-1.97172	chr1	33472644	33501643	5218	ENST00000684572.1	ENSG00000121903.15	ENSG00000121903	1	33472645	33501643	176.011	1.20421	0.154435	7.79752	6.31347e-15	1.19446e-12
ZNF7	-2.003	1.53605	-1.96655	chr8	144827559	144843772	9031	ENST00000532777.6	ENSG00000147789.16	ENSG00000147789	8	144827518	144847509	1213.59	0.564124	0.0794458	7.10074	1.24087e-12	1.6319e-10
ZNF552	-3.30949	0.98946	-1.95203	chr19	57807081	57814913	14586	ENST00000391701.1	ENSG00000178935.5	ENSG00000178935	19	57803841	57814913	421.556	0.496959	0.108649	4.574	4.785e-06	0.000152222
PPRC1	-2.07365	1.48066	-1.94412	chr10	102133039	102150333	9154	ENST00000278070.7	ENSG00000148840.11	ENSG00000148840	10	102132994	102150333	5914.48	0.722427	0.105545	6.8447	7.66388e-12	8.98341e-10
ZNF668	-3.31562	0.975496	-1.94241	chr16	31060846	31074240	12095	ENST00000300849.5	ENSG00000167394.13	ENSG00000167394	16	31060843	31074240	1081.72	0.38335	0.0850103	4.50945	6.49962e-06	0.000199125
ZNF627	-2.62578	1.25414	-1.94173	chr19	11597482	11619161	17782	ENST00000361113.10	ENSG00000198551.10	ENSG00000198551	19	11559374	11619161	202.951	0.960794	0.165724	5.79755	6.7291e-09	4.31944e-07
ZNF296	-3.69726	0.785779	-1.91299	chr19	45071499	45076478	12892	ENST00000303809.7	ENSG00000170684.10	ENSG00000170684	19	45071500	45076478	614.788	0.542046	0.149224	3.63244	0.000280756	0.00464366
C2orf42	-2.17237	1.40226	-1.91194	chr2	70149884	70191019	4521	ENST00000264434.7	ENSG00000115998.8	ENSG00000115998	2	70149885	70248615	340.519	0.783797	0.120914	6.48225	9.03671e-11	8.77945e-09
ZNF586	-2.78248	1.15223	-1.90953	chr19	57769675	57780616	1611	ENST00000396154.7	ENSG00000083828.16	ENSG00000083828	19	57769655	57819939	265.786	0.690546	0.129645	5.32643	1.00163e-07	4.73753e-06
TRIM11	-3.10413	1.0036	-1.89418	chr1	228393675	228406835	9773	ENST00000284551.11	ENSG00000154370.16	ENSG00000154370	1	228393673	228406835	2764.23	0.431599	0.0930294	4.63939	3.49443e-06	0.000116308
CNOT4	-2.7297	1.15071	-1.89035	chr7	135361794	135510102	1506	ENST00000541284.6	ENSG00000080802.21	ENSG00000080802	7	135361795	135510145	1067.13	0.640907	0.120484	5.31942	1.04099e-07	4.90221e-06
ZNF394	-1.96243	1.4558	-1.88555	chr7	99493239	99500281	10562	ENST00000337673.7	ENSG00000160908.15	ENSG00000160908	7	99473877	99504857	763.666	0.509937	0.0757734	6.72976	1.69939e-11	1.83262e-09
GATA3	-1.92456	1.46659	-1.88174	chr10	8054687	8075198	3424	ENST00000379328.9	ENSG00000107485.18	ENSG00000107485	10	8045378	8075198	1028.6	0.578011	0.0852569	6.77964	1.20474e-11	1.32571e-09
C19orf44	-2.55221	1.21028	-1.88002	chr19	16496393	16521352	3034	ENST00000221671.8	ENSG00000105072.9	ENSG00000105072	19	16496394	16521352	486.469	0.594961	0.106342	5.59477	2.20916e-08	1.24081e-06
ZNF689	-2.29049	1.31353	-1.8777	chr16	30602557	30610389	10036	ENST00000287461.8	ENSG00000156853.13	ENSG00000156853	16	30602558	30624012	2870.39	0.506875	0.0834761	6.0721	1.2625e-09	9.26174e-08
ZNF786	-1.96354	1.44537	-1.87719	chr7	149069640	149090718	17407	ENST00000491431.2	ENSG00000197362.15	ENSG00000197362	7	149069641	149090782	550.34	0.887537	0.132834	6.68153	2.36464e-11	2.47575e-09
CLK4	-2.37782	1.27476	-1.87485	chr5	178602663	178627050	4161	ENST00000316308.9	ENSG00000113240.14	ENSG00000113240	5	178602664	178630615	550.779	0.595576	0.101067	5.89285	3.79585e-09	2.60729e-07
ZNF703	-2.19897	1.347	-1.87468	chr8	37695781	37700019	15591	ENST00000331569.6	ENSG00000183779.7	ENSG00000183779	8	37695782	37700019	17146.8	0.563868	0.0905548	6.22682	4.76007e-10	3.83079e-08
ZNF696	-2.34027	1.28797	-1.87318	chr8	143291416	143299952	16063	ENST00000330143.8	ENSG00000185730.8	ENSG00000185730	8	143289676	143299952	653.6	0.622429	0.104541	5.95392	2.618e-09	1.8574e-07
R3HCC1L	-1.80555	1.49991	-1.86926	chr10	98134656	98244897	11751	ENST00000298999.8	ENSG00000166024.14	ENSG00000166024	10	98134624	98244897	741.092	0.740588	0.106811	6.93366	4.1008e-12	5.08311e-10
ZNF211	-2.0276	1.40915	-1.86859	chr19	57633167	57644041	5173	ENST00000240731.5	ENSG00000121417.14	ENSG00000121417	19	57630395	57644041	382.636	0.663428	0.101845	6.51409	7.31293e-11	7.23511e-09
PAX3	-2.44477	1.23383	-1.86329	chr2	222199886	222298998	7172	ENST00000392070.7	ENSG00000135903.20	ENSG00000135903	2	222199887	222298998	347.415	0.787916	0.138142	5.70366	1.17263e-08	6.91016e-07
ZNF775	-2.41501	1.22788	-1.8482	chr7	150379329	150398630	17125	ENST00000329630.10	ENSG00000196456.13	ENSG00000196456	7	150368790	150398630	313.316	0.65217	0.114897	5.67613	1.37773e-08	7.98789e-07
ZNF230	-3.03303	0.974203	-1.84542	chr19	44002956	44013924	10407	ENST00000429154.7	ENSG00000159882.13	ENSG00000159882	19	44002957	44013924	182.614	0.61594	0.13677	4.50347	6.68519e-06	0.000202509
HELQ	-2.43856	1.20411	-1.83628	chr4	83407345	83455823	10978	ENST00000295488.8	ENSG00000163312.11	ENSG00000163312	4	83407343	83455855	610.598	0.502612	0.0902962	5.56626	2.60269e-08	1.42474e-06
NFIL3	-2.31896	1.25111	-1.83506	chr9	91409044	91423832	11515	ENST00000297689.4	ENSG00000165030.4	ENSG00000165030	9	91409045	91423832	573.488	0.587762	0.101627	5.78352	7.31554e-09	4.63629e-07
HLX	-3.31377	0.846168	-1.83344	chr1	220879442	220885059	7310	ENST00000366903.8	ENSG00000136630.13	ENSG00000136630	1	220879431	220885059	660.458	0.543773	0.139015	3.9116	9.16851e-05	0.00190875
CSRNP1	-2.13892	1.3209	-1.83244	chr3	39141854	39153591	8609	ENST00000273153.10	ENSG00000144655.15	ENSG00000144655	3	39141855	39154562	236.641	0.980265	0.160537	6.10615	1.02062e-09	7.64333e-08
ZNF337	-1.62838	1.52431	-1.82958	chr20	25673194	25696853	6314	ENST00000252979.6	ENSG00000130684.14	ENSG00000130684	20	25673195	25696853	823.708	0.664162	0.0942549	7.04644	1.83548e-12	2.35641e-10
ZNF256	-2.01249	1.36431	-1.8259	chr19	57940832	57947706	9549	ENST00000282308.4	ENSG00000152454.4	ENSG00000152454	19	57940833	57947706	261.829	0.732195	0.116096	6.30683	2.84805e-10	2.47688e-08
RBM48	-1.67162	1.49278	-1.81784	chr7	92528794	92540481	5981	ENST00000265732.10	ENSG00000127993.16	ENSG00000127993	7	92528773	92540481	424.265	0.741486	0.107451	6.9007	5.17455e-12	6.34117e-10
FBXO5	-2.9161	0.982361	-1.81257	chr6	152970534	152983041	3993	ENST00000229758.8	ENSG00000112029.10	ENSG00000112029	6	152970519	152983579	1732.49	0.550497	0.121223	4.54118	5.59396e-06	0.000173348
ZNF628	-2.53538	1.12556	-1.80334	chr19	55476616	55484487	17448	ENST00000598519.2	ENSG00000197483.11	ENSG00000197483	19	55476617	55484487	515.306	0.595192	0.11439	5.20317	1.95915e-07	8.83995e-06
ZNF2	-2.5127	1.13402	-1.80273	chr2	95165808	95184317	55626	ENST00000614034.5	ENSG00000275111.5	ENSG00000275111	2	95165432	95184317	306.124	0.936433	0.178631	5.24227	1.58612e-07	7.30971e-06
ZNF319	-1.98227	1.34757	-1.80162	chr16	57994675	58000672	11795	ENST00000299237.3	ENSG00000166188.3	ENSG00000166188	16	57994676	58000672	421.689	0.653044	0.104832	6.22945	4.68061e-10	3.79517e-08
ZNF649	-2.24226	1.2414	-1.80091	chr19	51889234	51905017	17651	ENST00000354957.8	ENSG00000198093.11	ENSG00000198093	19	51889235	51905040	358.849	0.712886	0.124225	5.73865	9.54352e-09	5.74957e-07
DDIT3	-2.36064	1.19173	-1.79947	chr12	57516592	57520514	13852	ENST00000346473.8	ENSG00000175197.13	ENSG00000175197	12	57516588	57521737	555.042	0.892411	0.16199	5.50904	3.60797e-08	1.91302e-06
COX19	-2.22759	1.24044	-1.79512	chr7	964851	975549	37089	ENST00000344111.4	ENSG00000240230.6	ENSG00000240230	7	898778	975549	597.153	0.633517	0.11048	5.73419	9.79772e-09	5.8419e-07
HOXB3	-1.9573	1.34926	-1.79456	chr17	48548869	48590241	5015	ENST00000498678.6	ENSG00000120093.12	ENSG00000120093	17	48548870	48604912	683.624	0.824348	0.132165	6.23725	4.4532e-10	3.6659e-08
ZSCAN25	-2.18186	1.25626	-1.79286	chr7	99616945	99632408	17300	ENST00000394152.7	ENSG00000197037.11	ENSG00000197037	7	99616946	99632408	841.017	0.7451	0.128303	5.80735	6.3469e-09	4.0985e-07
RPP38	-3.25826	0.819897	-1.79259	chr10	15097354	15104257	9553	ENST00000378197.5	ENSG00000152464.15	ENSG00000152464	10	15097180	15139818	1361.67	0.420402	0.110919	3.79016	0.000150551	0.00281865
CCDC174	-2.23954	1.22697	-1.78789	chr3	14651761	14672655	9816	ENST00000383794.7	ENSG00000154781.17	ENSG00000154781	3	14651762	14672659	790.333	0.768989	0.135578	5.67194	1.41186e-08	8.142e-07
TRPV1	-1.97121	1.33548	-1.78773	chr17	3565445	3609411	17203	ENST00000572705.2	ENSG00000196689.13	ENSG00000196689	17	3565444	3609411	405.471	0.60801	0.0984864	6.17355	6.67748e-10	5.15566e-08
ZNF419	-2.49009	1.12297	-1.7858	chr19	57487749	57496098	3041	ENST00000221735.12	ENSG00000105136.22	ENSG00000105136	19	57487711	57496098	242.226	0.586122	0.112907	5.1912	2.08941e-07	9.31083e-06
ZNF189	-2.78009	1.00483	-1.78524	chr9	101398850	101410654	7363	ENST00000339664.7	ENSG00000136870.11	ENSG00000136870	9	101398851	101410660	555.964	0.624493	0.134443	4.64505	3.39992e-06	0.00011422
ZNF823	-2.24067	1.21534	-1.77853	chr19	11721264	11738946	17589	ENST00000341191.11	ENSG00000197933.13	ENSG00000197933	19	11721265	11739009	198.794	0.83217	0.148121	5.61817	1.92988e-08	1.08962e-06
GRPEL2	-2.45742	1.1239	-1.77549	chr5	149345498	149354583	11315	ENST00000329271.8	ENSG00000164284.15	ENSG00000164284	5	149345430	149354583	1828.64	0.381102	0.0733524	5.1955	2.04171e-07	9.136e-06
CENPL	-2.2897	1.19109	-1.77485	chr1	173799549	173824883	5051	ENST00000682279.1	ENSG00000120334.16	ENSG00000120334	1	173799550	173824883	492.135	0.606327	0.11012	5.50607	3.66939e-08	1.93028e-06
ZNF133	-2.36306	1.16126	-1.77477	chr20	18288526	18316996	5741	ENST00000425686.3	ENSG00000125846.17	ENSG00000125846	20	18288283	18316996	690.082	0.645245	0.120198	5.3682	7.9527e-08	3.91607e-06
ZKSCAN5	-1.92817	1.3354	-1.77306	chr7	99504661	99534700	17189	ENST00000326775.10	ENSG00000196652.12	ENSG00000196652	7	99504662	99534700	983.683	0.568228	0.0920479	6.17318	6.69317e-10	5.15566e-08
RGS2	-2.06421	1.26411	-1.7595	chr1	192809038	192812275	4619	ENST00000235382.7	ENSG00000116741.8	ENSG00000116741	1	192809039	192812275	453.921	0.827851	0.141667	5.84362	5.10787e-09	3.35873e-07
SNHG12	-2.70071	0.987502	-1.74379	chr1	28578537	28582986	17611	ENST00000648127.1	ENSG00000197989.15	ENSG00000197989	1	28578538	28583132	569.792	0.933604	0.204516	4.56495	4.99618e-06	0.000156624
BHLHE40	-2.25979	1.16157	-1.73998	chr3	4979436	4985323	6839	ENST00000256495.4	ENSG00000134107.5	ENSG00000134107	3	4979437	4985323	589.673	0.682471	0.127098	5.36964	7.88937e-08	3.90271e-06
ZNF155	-2.86377	0.91181	-1.73571	chr19	43984187	43998326	20069	ENST00000270014.7	ENSG00000204920.11	ENSG00000204920	19	43967862	43998326	316.603	0.472787	0.112166	4.21505	2.49725e-05	0.000632167
OTX2	-2.42653	1.08585	-1.73313	chr14	56799904	56810479	11642	ENST00000672264.2	ENSG00000165588.19	ENSG00000165588	14	56799905	56816693	239.015	0.635197	0.126543	5.0196	5.17785e-07	2.13426e-05
ZNF18	-2.3909	1.08639	-1.72149	chr17	11977438	11997475	9836	ENST00000580306.7	ENSG00000154957.14	ENSG00000154957	17	11977439	11997475	429.686	0.568002	0.113101	5.02209	5.11123e-07	2.11998e-05
ISL2	-2.36005	1.09698	-1.71989	chr15	76336772	76342475	10374	ENST00000290759.9	ENSG00000159556.10	ENSG00000159556	15	76336773	76342475	791.608	0.515411	0.101638	5.07104	3.95646e-07	1.68015e-05
MYNN	-2.18483	1.1574	-1.71104	chr3	169773395	169789716	1651	ENST00000349841.10	ENSG00000085274.16	ENSG00000085274	3	169773396	169789716	879.053	0.5529	0.10334	5.35032	8.77994e-08	4.26499e-06
NABP1	-2.5521	1.005	-1.70801	chr2	191678135	191686943	13550	ENST00000425611.9	ENSG00000173559.15	ENSG00000173559	2	191678068	191741097	436.112	0.581276	0.125117	4.64585	3.38678e-06	0.000114134
RIPK4	-2.0063	1.22594	-1.70788	chr21	41739372	41767052	15488	ENST00000332512.8	ENSG00000183421.12	ENSG00000183421	21	41739369	41767089	430.745	0.894385	0.157818	5.6672	1.45151e-08	8.3261e-07
FAM193B	-1.94081	1.24852	-1.70457	chr5	177519788	177554563	8808	ENST00000514747.6	ENSG00000146067.17	ENSG00000146067	5	177519789	177554586	2073.05	0.43016	0.0745308	5.77158	7.85338e-09	4.83948e-07
RBAK	-2.45984	1.0372	-1.70368	chr7	5045859	5069487	8875	ENST00000396912.2	ENSG00000146587.18	ENSG00000146587	7	5045821	5069487	974.137	0.596912	0.124494	4.7947	1.62922e-06	6.14317e-05
TBCC	-3.14849	0.752719	-1.69906	chr6	42744497	42746103	5570	ENST00000372876.2	ENSG00000124659.7	ENSG00000124659	6	42744498	42746103	1281.76	0.302248	0.0868624	3.47961	0.000502136	0.00750004
MID1IP1	-2.20825	1.1331	-1.69864	chrX	38801458	38806532	11549	ENST00000614558.3	ENSG00000165175.17	ENSG00000165175	X	38801440	38806537	2261.11	0.40477	0.0772753	5.23803	1.62298e-07	7.44775e-06
ZNF182	-2.40858	1.04672	-1.69426	chrX	47974850	48003989	8934	ENST00000376943.8	ENSG00000147118.12	ENSG00000147118	X	47974851	48003989	384.14	0.534731	0.110511	4.83871	1.30685e-06	5.03323e-05
CEP95	-1.76731	1.30488	-1.69291	chr17	64506976	64537946	46392	ENST00000556440.7	ENSG00000258890.8	ENSG00000258890	17	64506865	64542461	1350.7	0.596873	0.0989494	6.0321	1.6184e-09	1.17924e-07
PPP1R15A	-1.87572	1.26093	-1.69287	chr19	48872420	48876058	1716	ENST00000200453.6	ENSG00000087074.9	ENSG00000087074	19	48872212	48876059	976.267	0.638323	0.10951	5.82892	5.57872e-09	3.64612e-07
ZBTB14	-2.87584	0.84681	-1.68536	chr18	5289021	5295726	17644	ENST00000651870.1	ENSG00000198081.11	ENSG00000198081	18	5289019	5297053	384.353	0.655185	0.167371	3.91457	9.05654e-05	0.00188909
DLX2	-2.41082	1.0253	-1.67707	chr2	172099437	172102900	4500	ENST00000234198.9	ENSG00000115844.11	ENSG00000115844	2	172099438	172102900	1837.81	0.398692	0.0841182	4.73966	2.14073e-06	7.66963e-05
LENG9	-3.23463	0.689002	-1.67491	chr19	54461731	54463778	55684	ENST00000611161.2	ENSG00000275183.2	ENSG00000275183	19	54461732	54463778	465.018	0.414461	0.130126	3.18507	0.0014472	0.0170564
LENG9	-3.23463	0.689002	-1.67491	chr19_GL949746v1_alt	368304	370225	58060	ENST00000622643.1	ENSG00000278312.1	ENSG00000278312	HSCHR19LRC_COX1_CTG3_1	368305	370225	465.018	0.414461	0.130126	3.18507	0.0014472	0.0170564
LENG9	-3.23463	0.689002	-1.67491	chr19_GL949752v1_alt	366478	368402	55158	ENST00000614111.1	ENSG00000274495.1	ENSG00000274495	HSCHR19LRC_PGF1_CTG3_1	366479	368402	465.018	0.414461	0.130126	3.18507	0.0014472	0.0170564
LENG9	-3.23463	0.689002	-1.67491	chr19_KI270938v1_alt	444089	446008	54468	ENST00000622419.1	ENSG00000273574.1	ENSG00000273574	HSCHR19_4_CTG3_1	444090	446008	465.018	0.414461	0.130126	3.18507	0.0014472	0.0170564
ACTN2	-1.65869	1.32572	-1.6735	chr1	236686498	236764631	1391	ENST00000366578.6	ENSG00000077522.15	ENSG00000077522	1	236664141	236764631	502.11	0.796407	0.129953	6.12844	8.87465e-10	6.73974e-08
ZNF584	-1.92657	1.20135	-1.66022	chr19	58408648	58418327	13107	ENST00000306910.9	ENSG00000171574.19	ENSG00000171574	19	58401504	58431736	663.463	0.511043	0.0920214	5.55352	2.79972e-08	1.52486e-06
SNHG1	-2.75078	0.867123	-1.65993	chr11	62851987	62855885	44740	ENST00000692454.1	ENSG00000255717.9	ENSG00000255717	11	62851978	62855953	7780.38	0.617847	0.154135	4.00847	6.11126e-05	0.00135326
WDR89	-2.19903	1.08579	-1.65588	chr14	63597038	63641871	7920	ENST00000620954.2	ENSG00000140006.12	ENSG00000140006	14	63597039	63641871	611.617	0.510383	0.101684	5.01933	5.18524e-07	2.13426e-05
ZNF48	-2.80929	0.833661	-1.65176	chr16	30395419	30400108	14799	ENST00000613509.2	ENSG00000180035.13	ENSG00000180035	16	30378106	30400108	1535.08	0.333272	0.0864792	3.85379	0.000116305	0.00228875
ZNF12	-2.84412	0.819447	-1.65167	chr7	6688432	6706947	11409	ENST00000405858.6	ENSG00000164631.19	ENSG00000164631	7	6688433	6706947	575.139	0.650377	0.171691	3.78808	0.000151818	0.00283253
ZNF700	-1.61959	1.31415	-1.65054	chr19	11925106	11950763	17223	ENST00000254321.10	ENSG00000196757.8	ENSG00000196757	19	11925068	11950773	390.709	0.649558	0.106924	6.07497	1.24008e-09	9.15958e-08
MSL2	-2.80411	0.829561	-1.64656	chr3	136148916	136196335	13735	ENST00000309993.3	ENSG00000174579.5	ENSG00000174579	3	136148917	136197241	1067.14	0.465504	0.121388	3.83483	0.000125649	0.00242832
TCEANC	-2.31075	1.01044	-1.63066	chrX	13653140	13665409	14184	ENST00000696128.1	ENSG00000176896.9	ENSG00000176896	X	13653112	13681964	231.775	0.678396	0.145236	4.67098	2.9976e-06	0.000103943
BANP	-1.93169	1.1592	-1.62665	chr16	87951433	88077316	13340	ENST00000682872.1	ENSG00000172530.22	ENSG00000172530	16	87949244	88077318	616.636	0.553484	0.103288	5.35866	8.38425e-08	4.10981e-06
ZC3H10	-2.04779	1.11029	-1.62508	chr12	56118265	56127514	7099	ENST00000257940.7	ENSG00000135482.7	ENSG00000135482	12	56118260	56127514	329.707	0.686396	0.133733	5.13259	2.85785e-07	1.24774e-05
BAMBI	-2.04702	1.10543	-1.62075	chr10	28677520	28682932	2041	ENST00000375533.6	ENSG00000095739.11	ENSG00000095739	10	28677510	28682932	1238.45	0.60124	0.117657	5.11012	3.21954e-07	1.39436e-05
ITPRIP	-2.30877	0.99562	-1.61758	chr10	104309699	104338465	9155	ENST00000337478.3	ENSG00000148841.17	ENSG00000148841	10	104309698	104338465	506.832	0.563136	0.122355	4.60248	4.17495e-06	0.00013602
CSTF1	-2.08715	1.07151	-1.60594	chr20	56392644	56406362	2449	ENST00000217109.9	ENSG00000101138.12	ENSG00000101138	20	56392371	56406362	1864.31	0.315656	0.0637265	4.95329	7.29701e-07	2.91448e-05
HEY2	-2.34828	0.963707	-1.60425	chr6	125749631	125761269	7112	ENST00000368364.4	ENSG00000135547.9	ENSG00000135547	6	125747664	125761269	469.555	0.537289	0.120605	4.45495	8.39109e-06	0.000243251
KCNK5	-1.97386	1.11363	-1.60279	chr6	39188970	39229475	11407	ENST00000359534.4	ENSG00000164626.9	ENSG00000164626	6	39188971	39229475	536.85	0.501808	0.0974759	5.14802	2.63249e-07	1.16347e-05
ZNF430	-2.66173	0.832714	-1.60088	chr19	21020656	21060050	4839	ENST00000261560.10	ENSG00000118620.13	ENSG00000118620	19	21020634	21060050	218.841	0.690865	0.179473	3.84941	0.000118405	0.00232201
ZNF430	-2.66173	0.832714	-1.60088	chr19_GL383573v1_alt	363992	380078	58430	ENST00000625163.3	ENSG00000278780.4	ENSG00000278780	HSCHR19_1_CTG2	363896	380078	218.841	0.690865	0.179473	3.84941	0.000118405	0.00232201
SLC25A25	-2.23277	0.997486	-1.59335	chr9	128068231	128109245	9089	ENST00000373069.10	ENSG00000148339.13	ENSG00000148339	9	128068201	128109245	756.189	0.56438	0.122396	4.6111	4.00541e-06	0.0001311
AEN	-1.84218	1.15237	-1.59055	chr15	88621339	88632281	14991	ENST00000332810.4	ENSG00000181026.15	ENSG00000181026	15	88621337	88632281	2674.69	0.430854	0.0808798	5.32709	9.97961e-08	4.73753e-06
ZNF343	-2.35778	0.927263	-1.57694	chr20	2481816	2508915	1795	ENST00000278772.9	ENSG00000088876.13	ENSG00000088876	20	2481817	2524702	657.851	0.464022	0.108252	4.28648	1.81525e-05	0.000476293
PPP1R3D	-2.56711	0.828103	-1.56491	chr20	59936662	59940305	6670	ENST00000370996.5	ENSG00000132825.7	ENSG00000132825	20	59936663	59940305	245.619	0.593613	0.155068	3.82809	0.000129141	0.00248246
ZNF431	-1.90533	1.08929	-1.55914	chr19	21142039	21196053	17208	ENST00000311048.11	ENSG00000196705.8	ENSG00000196705	19	21142024	21196053	239.818	0.966486	0.191934	5.0355	4.76605e-07	1.99214e-05
LCMT2	-2.02881	1.03733	-1.55751	chr15	43323648	43330573	12452	ENST00000305641.7	ENSG00000168806.8	ENSG00000168806	15	43323649	43330582	1098.5	0.446293	0.0930691	4.79529	1.62439e-06	6.14317e-05
ZNF175	-2.14574	0.988323	-1.55614	chr19	51571282	51592510	3123	ENST00000262259.7	ENSG00000105497.8	ENSG00000105497	19	51571283	51592510	214.454	0.861346	0.18853	4.56874	4.90654e-06	0.000154714
SCAND2P	-1.79311	1.13094	-1.55595	chr15	84631962	84642066	14139	ENST00000541103.2	ENSG00000176700.23	ENSG00000176700	15	84631963	84642066	300.429	0.77011	0.147304	5.22803	1.71323e-07	7.79558e-06
SCAND2P	-1.79311	1.13094	-1.55595	chr15_MU273374v1_fix	1123808	1133912	69426	ENST00000708257.1	ENSG00000291642.1	ENSG00000291642	HG2280_PATCH	1123809	1133912	300.429	0.77011	0.147304	5.22803	1.71323e-07	7.79558e-06
AKAP17A	-2.04283	1.01302	-1.5419	chrX	1591603	1602520	17605	ENST00000313871.9	ENSG00000197976.12	ENSG00000197976	X	1591604	1602520	1895.8	0.411994	0.0879784	4.6829	2.82842e-06	9.90313e-05
AKAP17A	-2.04283	1.01302	-1.5419	chrY	1591603	1602520	70086	ENST00000711132.1	ENSG00000292343.1	ENSG00000292343	Y	1591604	1602520	1895.8	0.411994	0.0879784	4.6829	2.82842e-06	9.90313e-05
ZNF615	-2.66861	0.757439	-1.54016	chr19	51991331	52008211	17493	ENST00000598071.6	ENSG00000197619.15	ENSG00000197619	19	51991332	52008230	168.211	0.625146	0.17854	3.50143	0.000462763	0.00696017
PELO	-2.64567	0.750738	-1.52676	chr5	52787915	52804044	9582	ENST00000274311.3	ENSG00000152684.11	ENSG00000152684	5	52787916	52804044	1514.68	0.246069	0.070904	3.47045	0.000519581	0.00772698
ZSCAN26	-2.25842	0.898047	-1.51875	chr6	28267142	28278204	17311	ENST00000421553.7	ENSG00000197062.12	ENSG00000197062	6	28267058	28278224	500.826	0.399621	0.0962612	4.15143	3.30411e-05	0.000807972
ZNF697	-2.43568	0.821666	-1.51492	chr1	119619376	119648266	8320	ENST00000421812.3	ENSG00000143067.5	ENSG00000143067	1	119619377	119648266	622.989	0.591438	0.15571	3.79834	0.00014567	0.00274155
IRF2BP2	-2.24628	0.893649	-1.51095	chr1	234604268	234610178	12323	ENST00000366609.4	ENSG00000168264.11	ENSG00000168264	1	234604269	234610178	4889.56	0.308294	0.0746277	4.13109	3.61044e-05	0.000874944
ZNF197	-1.62946	1.13947	-1.50755	chr3	44625035	44648471	16253	ENST00000344387.9	ENSG00000186448.15	ENSG00000186448	3	44584888	44648471	418.594	0.555668	0.105491	5.26746	1.38327e-07	6.45764e-06
ZNF197	-1.62946	1.13947	-1.50755	chr3_KN196475v1_fix	150389	173825	60472	ENST00000628172.3	ENSG00000281709.3	ENSG00000281709	HG2066_PATCH	110242	173825	418.594	0.555668	0.105491	5.26746	1.38327e-07	6.45764e-06
PRDM15	-2.17006	0.918633	-1.50601	chr21	41798224	41879344	8193	ENST00000398548.6	ENSG00000141956.14	ENSG00000141956	21	41798225	41879482	562.195	0.583475	0.137398	4.24659	2.17052e-05	0.00056402
SETD4	-2.0663	0.958084	-1.50385	chr21	36034540	36060526	16115	ENST00000332131.9	ENSG00000185917.14	ENSG00000185917	21	36034541	36079389	1121.42	0.46618	0.105257	4.42896	9.46899e-06	0.000271579
ARL4D	-2.80508	0.654979	-1.50064	chr17	43398992	43401137	13990	ENST00000320033.5	ENSG00000175906.5	ENSG00000175906	17	43398993	43401137	394.044	0.433207	0.143077	3.02779	0.00246352	0.0248751
ZBTB9	-2.89199	0.618747	-1.49978	chr6	33454575	33457544	22575	ENST00000395064.3	ENSG00000213588.6	ENSG00000213588	6	33453970	33457544	887.42	0.279184	0.0976065	2.8603	0.00423242	0.0365445
ZBTB9	-2.89199	0.618747	-1.49978	chr6_GL000256v2_alt	4903301	4906271	35014	ENST00000414934.2	ENSG00000236515.3	ENSG00000236515	HSCHR6_MHC_SSTO_CTG1	4903302	4906271	887.42	0.279184	0.0976065	2.8603	0.00423242	0.0365445
NANP	-1.84951	1.03331	-1.4933	chr20	25612934	25624014	12773	ENST00000304788.4	ENSG00000170191.5	ENSG00000170191	20	25612935	25624014	596.165	0.46331	0.0969935	4.77671	1.7819e-06	6.53607e-05
IRF9	-2.04862	0.952026	-1.49277	chr14	24161264	24166565	22747	ENST00000396864.8	ENSG00000213928.10	ENSG00000213928	14	24161234	24168043	253.604	0.612168	0.139099	4.40095	1.07776e-05	0.000302671
IRF9	-2.04862	0.952026	-1.49277	chr14_KZ208920v1_fix	462242	467543	63326	ENST00000646071.2	ENSG00000285048.2	ENSG00000285048	HG1_PATCH	462243	467543	253.604	0.612168	0.139099	4.40095	1.07776e-05	0.000302671
CLK1	-1.88409	1.01692	-1.4913	chr2	200853008	200864658	335	ENST00000321356.9	ENSG00000013441.17	ENSG00000013441	2	200853009	200864691	1168.13	0.479735	0.102051	4.70093	2.58976e-06	9.12678e-05
KLHL25	-2.30414	0.842678	-1.48788	chr15	85759325	85794925	15552	ENST00000337975.6	ENSG00000183655.13	ENSG00000183655	15	85759326	85794925	594.77	0.505849	0.129856	3.89547	9.8009e-05	0.00199797
ZNF791	-2.23502	0.867451	-1.48518	chr19	12610919	12633834	13611	ENST00000343325.9	ENSG00000173875.14	ENSG00000173875	19	12610918	12633840	190.076	1.07733	0.268661	4.00999	6.07224e-05	0.00135326
RASGEF1B	-2.19533	0.8817	-1.48364	chr4	81426392	81471907	7720	ENST00000264400.7	ENSG00000138670.19	ENSG00000138670	4	81426393	82044244	224.1	0.880136	0.215939	4.07586	4.5845e-05	0.00107244
ZNF548	-2.24345	0.859316	-1.48122	chr19	57389853	57402992	16810	ENST00000336128.12	ENSG00000188785.12	ENSG00000188785	19	57389850	57402992	345.63	0.66024	0.166208	3.97238	7.11581e-05	0.001544
FOXO3B	-2.68671	0.674432	-1.47677	chr17	18667628	18682314	37180	ENST00000395675.7	ENSG00000240445.6	ENSG00000240445	17	18667629	18682314	410.249	0.536494	0.172079	3.11771	0.0018226	0.0200356
TOPORS	-2.18443	0.877879	-1.47674	chr9	32540543	32552586	17475	ENST00000360538.7	ENSG00000197579.8	ENSG00000197579	9	32540544	32552586	832.286	0.656255	0.161711	4.0582	4.94534e-05	0.00114198
ZNF227	-1.84709	1.00767	-1.47099	chr19	44212531	44237268	6408	ENST00000313040.12	ENSG00000131115.16	ENSG00000131115	19	44207547	44237268	566.609	0.537777	0.115448	4.65817	3.19035e-06	0.000109221
EFNA1	-2.53909	0.724723	-1.4688	chr1	155127875	155134899	12564	ENST00000368407.8	ENSG00000169242.12	ENSG00000169242	1	155127876	155134899	305.522	0.45155	0.134783	3.35019	0.000807548	0.0107514
NBPF12	-2.22797	0.849738	-1.46795	chr1	146938323	146996198	51729	ENST00000698835.1	ENSG00000268043.9	ENSG00000268043	1	146938324	146996202	356.195	0.599957	0.152734	3.92811	8.56174e-05	0.0017963
CCDC142	-2.21786	0.850453	-1.46511	chr2	74472831	74482998	7128	ENST00000393965.8	ENSG00000135637.14	ENSG00000135637	2	74471986	74483408	639.295	0.573857	0.145967	3.93141	8.44486e-05	0.0017787
IER5	-2.46786	0.744111	-1.46087	chr1	181088699	181092900	10844	ENST00000367577.7	ENSG00000162783.11	ENSG00000162783	1	181088700	181092900	1954.5	0.289604	0.0841917	3.43982	0.000582103	0.00836986
KLHL26	-1.74913	1.0342	-1.45998	chr19	18637027	18671721	12109	ENST00000300976.9	ENSG00000167487.12	ENSG00000167487	19	18637025	18671721	455.725	0.507341	0.10612	4.78084	1.74562e-06	6.47772e-05
RUNDC1	-1.84615	0.992692	-1.45813	chr17	42980564	42995142	17925	ENST00000361677.6	ENSG00000198863.8	ENSG00000198863	17	42980565	42995142	724.25	0.551678	0.120219	4.58894	4.45501e-06	0.000144273
SNIP1	-1.65919	1.05863	-1.44992	chr1	37534448	37554293	11170	ENST00000296215.8	ENSG00000163877.11	ENSG00000163877	1	37534449	37554293	683.085	0.451649	0.0922909	4.89376	9.89279e-07	3.86536e-05
ZNF142	-2.12253	0.867207	-1.4468	chr2	218633328	218659623	4460	ENST00000411696.7	ENSG00000115568.16	ENSG00000115568	2	218633329	218659655	1619.81	0.560752	0.139878	4.00886	6.1013e-05	0.00135326
ZFP1	-2.04027	0.896425	-1.44336	chr16	75148523	75172234	15766	ENST00000570010.6	ENSG00000184517.12	ENSG00000184517	16	75148494	75172236	584.816	0.541956	0.130783	4.14393	3.4141e-05	0.000831098
REV1	-1.63357	1.04689	-1.43139	chr2	99400476	99490017	7188	ENST00000258428.8	ENSG00000135945.10	ENSG00000135945	2	99400475	99490035	806.841	0.577694	0.119371	4.83948	1.30182e-06	5.03185e-05
DDX20	-1.79707	0.973755	-1.42561	chr1	111755900	111768000	898	ENST00000369702.5	ENSG00000064703.13	ENSG00000064703	1	111754832	111775602	2478.19	0.381286	0.0847038	4.5014	6.75066e-06	0.000202783
BRD1	-1.74882	0.991357	-1.42398	chr22	49773282	49827873	2310	ENST00000404760.6	ENSG00000100425.19	ENSG00000100425	22	49773283	49827873	1549.48	0.621336	0.135581	4.58277	4.58855e-06	0.000146834
ZNF764	-2.31549	0.758927	-1.42157	chr16	30553763	30558374	12723	ENST00000395091.3	ENSG00000169951.10	ENSG00000169951	16	30553764	30558374	837.137	0.336964	0.0960473	3.50831	0.000450962	0.00684954
USPL1	-2.04759	0.863188	-1.418	chr13	30617919	30660766	6690	ENST00000255304.9	ENSG00000132952.12	ENSG00000132952	13	30617693	30660770	593.814	0.576922	0.144582	3.99028	6.59946e-05	0.00144358
ZNF500	-2.40814	0.715404	-1.41655	chr16	4748238	4767162	2782	ENST00000219478.11	ENSG00000103199.14	ENSG00000103199	16	4748239	4767624	658.318	0.609671	0.184351	3.30711	0.000942625	0.0122326
BCDIN3D	-2.14447	0.816674	-1.41191	chr12	49836042	49843106	16309	ENST00000333924.6	ENSG00000186666.6	ENSG00000186666	12	49836043	49843106	438.76	0.522728	0.138462	3.77526	0.000159842	0.00296684
ING1	-2.37383	0.721688	-1.41017	chr13	110713699	110723339	9672	ENST00000333219.9	ENSG00000153487.13	ENSG00000153487	13	110712736	110723339	329.348	0.37736	0.113112	3.33616	0.000849432	0.0111575
CCNT1	-1.98553	0.872069	-1.40438	chr12	48688457	48716707	6135	ENST00000261900.8	ENSG00000129315.12	ENSG00000129315	12	48688458	48716998	1771.48	0.622766	0.154481	4.03134	5.54607e-05	0.00125385
ZNFX1	-2.42611	0.692669	-1.40361	chr20	49245899	49278057	5483	ENST00000396105.6	ENSG00000124201.15	ENSG00000124201	20	49237946	49278426	634.689	0.453087	0.1415	3.20202	0.00136469	0.0163157
ZNF776	-1.85657	0.923263	-1.4035	chr19	57746814	57758148	9548	ENST00000317178.10	ENSG00000152443.13	ENSG00000152443	19	57746815	57758148	407.481	0.763016	0.178776	4.26799	1.97242e-05	0.000513782
FAM110B	-1.95014	0.884454	-1.40274	chr8	57994522	58148784	12531	ENST00000519262.6	ENSG00000169122.12	ENSG00000169122	8	57994523	58204279	257.875	0.488224	0.119411	4.08859	4.34008e-05	0.00102865
GATA2	-1.7126	0.974828	-1.39784	chr3	128479426	128493201	14676	ENST00000341105.7	ENSG00000179348.13	ENSG00000179348	3	128479427	128493201	1785.19	0.307449	0.0682257	4.50636	6.59493e-06	0.000200337
E2F8	-1.91588	0.89117	-1.39674	chr11	19224062	19240945	6118	ENST00000250024.9	ENSG00000129173.13	ENSG00000129173	11	19224063	19241620	620.814	0.492702	0.119598	4.11963	3.79475e-05	0.000905366
BRPF1	-1.79483	0.932606	-1.39038	chr3	9731734	9748015	10056	ENST00000383829.7	ENSG00000156983.17	ENSG00000156983	3	9731729	9748019	1940.17	0.492087	0.114142	4.31118	1.62384e-05	0.000434075
CCNT2	-2.41925	0.679591	-1.39032	chr2	134918821	134959342	1564	ENST00000264157.10	ENSG00000082258.13	ENSG00000082258	2	134918235	134959342	1195.81	0.600452	0.191132	3.14156	0.0016805	0.0189703
ZNF620	-1.99631	0.845084	-1.38543	chr3	40506038	40518736	14392	ENST00000314529.10	ENSG00000177842.12	ENSG00000177842	3	40477131	40518736	356.354	0.584985	0.149743	3.90659	9.3607e-05	0.00193013
POLQ	-1.94305	0.865775	-1.38469	chr3	121431430	121545988	692	ENST00000264233.6	ENSG00000051341.15	ENSG00000051341	3	121431431	121545988	991.215	0.571496	0.142794	4.00224	6.27452e-05	0.00138373
ZNF200	-2.09007	0.805468	-1.38406	chr16	3222324	3235158	266	ENST00000414144.7	ENSG00000010539.12	ENSG00000010539	16	3222325	3236221	740.398	0.438709	0.117823	3.72346	0.000196514	0.00350862
CSPP1	-2.02311	0.82758	-1.37986	chr8	67064391	67196614	2891	ENST00000678616.1	ENSG00000104218.16	ENSG00000104218	8	67062417	67196778	586.663	0.546639	0.142887	3.82568	0.000130413	0.002498
KLHL21	-2.51368	0.624757	-1.37643	chr1	6590723	6602869	10736	ENST00000377658.8	ENSG00000162413.17	ENSG00000162413	1	6590724	6614607	2605.74	0.269896	0.0934517	2.88808	0.00387603	0.0340251
PHF12	-1.87904	0.878854	-1.37393	chr17	28905249	28951518	3642	ENST00000332830.9	ENSG00000109118.14	ENSG00000109118	17	28905250	28951771	1251.75	0.358225	0.0881742	4.0627	4.8508e-05	0.00112739
RPRD2	-1.81858	0.902626	-1.37332	chr1	150364146	150476566	10932	ENST00000369068.5	ENSG00000163125.16	ENSG00000163125	1	150363091	150476566	1830.17	0.576065	0.138059	4.17259	3.01153e-05	0.000746581
ZNF449	-2.2392	0.731447	-1.37266	chrX	135344795	135363413	13497	ENST00000339249.5	ENSG00000173275.13	ENSG00000173275	X	135344796	135363413	347.834	0.432468	0.127901	3.38128	0.00072149	0.00996229
BTN2A1	-1.8849	0.87166	-1.36989	chr6	26457954	26469637	4113	ENST00000312541.10	ENSG00000112763.17	ENSG00000112763	6	26457904	26476621	1233.51	0.370409	0.0919255	4.02944	5.59091e-05	0.00126135
BTN2A1	-1.8849	0.87166	-1.36989	chr6_MU273357v1_alt	4147	22801	69921	ENST00000709938.1	ENSG00000292170.1	ENSG00000292170	HSCHR6_1_CTG1	4084	22801	1233.51	0.370409	0.0919255	4.02944	5.59091e-05	0.00126135
TSC22D2	-2.36681	0.674629	-1.36837	chr3	150408297	150466422	17116	ENST00000688009.1	ENSG00000196428.13	ENSG00000196428	3	150408298	150466422	875.981	0.632934	0.202953	3.11863	0.00181697	0.0199941
ELL	-2.07807	0.791381	-1.36819	chr19	18442662	18522070	3161	ENST00000262809.9	ENSG00000105656.13	ENSG00000105656	19	18442663	18522116	743.73	0.480493	0.131342	3.65833	0.00025386	0.00429768
ZBTB1	-1.71414	0.930721	-1.36142	chr14	64504769	64524951	5865	ENST00000683701.1	ENSG00000126804.14	ENSG00000126804	14	64503712	64533690	673.592	0.458076	0.106468	4.30247	1.68905e-05	0.000447537
FBXL5	-1.73046	0.917486	-1.35586	chr4	15604380	15655357	4835	ENST00000341285.8	ENSG00000118564.15	ENSG00000118564	4	15604381	15681679	837.283	0.432026	0.101862	4.24129	2.22241e-05	0.000572009
ZNF623	-2.00533	0.802832	-1.3531	chr8	143636018	143653730	15465	ENST00000526926.6	ENSG00000183309.12	ENSG00000183309	8	143636019	143656418	615.863	0.612994	0.165171	3.71127	0.00020622	0.00363973
ZNF623	-2.00533	0.802832	-1.3531	chr8_KI270816v1_alt	111842	127845	56577	ENST00000620499.4	ENSG00000276340.4	ENSG00000276340	HSCHR8_3_CTG7	111843	131885	615.863	0.612994	0.165171	3.71127	0.00020622	0.00363973
WDR20	-2.02831	0.781641	-1.34314	chr14	102139896	102210527	7936	ENST00000342702.8	ENSG00000140153.18	ENSG00000140153	14	102139503	102224847	645.602	0.359099	0.0993822	3.61331	0.000302309	0.00492463
BAG3	-2.15079	0.727519	-1.33937	chr10	119651379	119677819	9487	ENST00000369085.8	ENSG00000151929.10	ENSG00000151929	10	119651380	119677819	1882.35	0.218499	0.064969	3.36312	0.000770666	0.0103886
INPP5E	-1.92419	0.817739	-1.33805	chr9	136428618	136439845	9099	ENST00000371712.4	ENSG00000148384.14	ENSG00000148384	9	136428619	136439845	1473.16	0.296856	0.0785295	3.78018	0.000156713	0.00291378
CLK2	-1.7772	0.876271	-1.3372	chr1	155262867	155273504	14097	ENST00000368361.9	ENSG00000176444.19	ENSG00000176444	1	155262868	155278491	3467.21	0.475171	0.117304	4.05076	5.1052e-05	0.00116889
CLK2	-1.7772	0.876271	-1.3372	chr1_GL383519v1_alt	67890	78539	48653	ENST00000574445.5	ENSG00000261893.5	ENSG00000261893	HSCHR1_2_CTG31	67891	83514	3467.21	0.475171	0.117304	4.05076	5.1052e-05	0.00116889
TRIM59	-2.10336	0.742359	-1.3357	chr3	160435502	160449786	22368	ENST00000309784.9	ENSG00000213186.8	ENSG00000213186	3	160432445	160485773	790.719	0.349142	0.10174	3.43172	0.000599766	0.00857809
ZNF646	-2.17532	0.710517	-1.33345	chr16	31074421	31084196	12096	ENST00000300850.5	ENSG00000167395.10	ENSG00000167395	16	31074422	31084196	724.502	0.669528	0.203843	3.28452	0.00102155	0.0130372
ZBTB24	-1.75083	0.87726	-1.32908	chr6	109462593	109483219	4061	ENST00000230122.4	ENSG00000112365.6	ENSG00000112365	6	109460632	109483239	1203.41	0.468451	0.115515	4.05533	5.00631e-05	0.00115359
GGNBP2	-1.97117	0.782018	-1.32407	chr17	36544918	36589848	58059	ENST00000613102.5	ENSG00000278311.5	ENSG00000278311	17	36544912	36589848	1608.62	0.329049	0.0910218	3.61506	0.000300284	0.00489903
GGNBP2	-1.97117	0.782018	-1.32407	chr17_KI270857v1_alt	779791	825343	55617	ENST00000621686.2	ENSG00000275099.2	ENSG00000275099	HSCHR17_7_CTG4	779792	825343	1608.62	0.329049	0.0910218	3.61506	0.000300284	0.00489903
TIFA	-2.37626	0.610732	-1.31805	chr4	112274536	112285904	8703	ENST00000361717.4	ENSG00000145365.12	ENSG00000145365	4	112272968	112285955	300.662	0.509773	0.180563	2.82325	0.00475398	0.0396649
GATA6	-1.78727	0.845675	-1.31498	chr18	22169588	22202528	8123	ENST00000269216.10	ENSG00000141448.11	ENSG00000141448	18	22169589	22202528	1318.24	0.518046	0.132516	3.90932	9.2555e-05	0.00191576
ARID4B	-2.01872	0.74999	-1.31337	chr1	235166901	235328179	724	ENST00000264183.9	ENSG00000054267.22	ENSG00000054267	1	235131634	235328219	791.159	0.736771	0.21251	3.467	0.000526303	0.00776423
PLEKHF1	-2.11833	0.708687	-1.31258	chr19	29665460	29675477	11822	ENST00000436066.4	ENSG00000166289.6	ENSG00000166289	19	29665459	29675477	187.875	0.531572	0.162259	3.27606	0.00105265	0.0132917
MIDN	-1.83828	0.819793	-1.31061	chr19	1248582	1259143	12106	ENST00000682408.1	ENSG00000167470.14	ENSG00000167470	19	1248553	1259143	1695.63	0.291112	0.0768172	3.78968	0.000150843	0.00281922
IRF1	-2.10476	0.708691	-1.30797	chr5	132481608	132490773	5636	ENST00000245414.9	ENSG00000125347.15	ENSG00000125347	5	132440440	132508719	269.984	0.43876	0.133928	3.27609	0.00105257	0.0132917
MTERF1	-1.68784	0.87469	-1.30555	chr7	91870928	91880702	5979	ENST00000351870.8	ENSG00000127989.14	ENSG00000127989	7	91692008	91880702	414.274	0.413808	0.10234	4.04345	5.26698e-05	0.00120083
POLG2	-1.76268	0.832704	-1.29578	chr17	64477784	64497054	45062	ENST00000539111.7	ENSG00000256525.8	ENSG00000256525	17	64477785	64497054	573.011	0.410171	0.106556	3.84936	0.000118426	0.00232201
ZNF566	-2.05458	0.708836	-1.29107	chr19	36445118	36489561	16144	ENST00000452939.7	ENSG00000186017.16	ENSG00000186017	19	36445119	36489902	304.461	0.658532	0.200971	3.27676	0.00105007	0.0132917
SNRK	-1.7142	0.845748	-1.29025	chr3	43286539	43351143	11137	ENST00000296088.12	ENSG00000163788.14	ENSG00000163788	3	43286512	43424764	566.643	0.571569	0.146194	3.90966	9.24257e-05	0.00191576
ZFX	-1.78652	0.816392	-1.2902	chrX	24149728	24216255	111	ENST00000304543.10	ENSG00000005889.16	ENSG00000005889	X	24149173	24216255	1359.17	0.614374	0.162793	3.77395	0.00016068	0.00297728
TRIM32	-1.9997	0.728944	-1.28929	chr9	116687304	116701299	4903	ENST00000450136.2	ENSG00000119401.11	ENSG00000119401	9	116687305	116701300	986.181	0.380522	0.112924	3.36971	0.00075248	0.0102357
ZBED5	-1.62654	0.876501	-1.28626	chr11	10852705	10858053	34828	ENST00000413761.7	ENSG00000236287.8	ENSG00000236287	11	10812074	10858796	1610.35	0.318257	0.0785466	4.05182	5.08204e-05	0.00116606
ZNF226	-1.95362	0.743858	-1.28614	chr19	44165099	44177685	12091	ENST00000337433.10	ENSG00000167380.17	ENSG00000167380	19	44165073	44178381	479.603	0.533305	0.155091	3.43865	0.000584625	0.00839493
PPP1R10	-1.799	0.805096	-1.28497	chr6	30600412	30617243	19938	ENST00000376511.7	ENSG00000204569.10	ENSG00000204569	6	30600413	30618612	2985.33	0.338158	0.0908603	3.72174	0.000197856	0.00352092
PPP1R10	-1.799	0.805096	-1.28497	chr6_GL000251v2_alt	2080123	2096968	30731	ENST00000420949.6	ENSG00000230995.7	ENSG00000230995	HSCHR6_MHC_COX_CTG1	2080124	2098336	2985.33	0.338158	0.0908603	3.72174	0.000197856	0.00352092
PPP1R10	-1.799	0.805096	-1.28497	chr6_GL000252v2_alt	1856229	1873074	28267	ENST00000449113.6	ENSG00000227804.7	ENSG00000227804	HSCHR6_MHC_DBB_CTG1	1856230	1874442	2985.33	0.338158	0.0908603	3.72174	0.000197856	0.00352092
PPP1R10	-1.799	0.805096	-1.28497	chr6_GL000253v2_alt	1910628	1927473	31298	ENST00000424446.6	ENSG00000231737.7	ENSG00000231737	HSCHR6_MHC_MANN_CTG1	1910629	1928841	2985.33	0.338158	0.0908603	3.72174	0.000197856	0.00352092
PPP1R10	-1.799	0.805096	-1.28497	chr6_GL000254v2_alt	1944446	1961292	34070	ENST00000426299.6	ENSG00000235291.7	ENSG00000235291	HSCHR6_MHC_MCF_CTG1	1944447	1962660	2985.33	0.338158	0.0908603	3.72174	0.000197856	0.00352092
PPP1R10	-1.799	0.805096	-1.28497	chr6_GL000255v2_alt	1855488	1872332	20518	ENST00000383586.8	ENSG00000206489.9	ENSG00000206489	HSCHR6_MHC_QBL_CTG1	1855489	1873700	2985.33	0.338158	0.0908603	3.72174	0.000197856	0.00352092
PPP1R10	-1.799	0.805096	-1.28497	chr6_GL000256v2_alt	1901157	1918002	36249	ENST00000429597.6	ENSG00000238104.7	ENSG00000238104	HSCHR6_MHC_SSTO_CTG1	1901158	1919370	2985.33	0.338158	0.0908603	3.72174	0.000197856	0.00352092
KIF18B	-2.20712	0.638595	-1.28399	chr17	44924710	44947773	16191	ENST00000593135.6	ENSG00000186185.14	ENSG00000186185	17	44924709	44947773	2909.48	0.351929	0.119215	2.95205	0.00315674	0.029602
RSBN1	-2.26037	0.616786	-1.28379	chr1	113761831	113812476	1519	ENST00000261441.9	ENSG00000081019.14	ENSG00000081019	1	113761832	113812476	629.153	0.55011	0.192938	2.85123	0.00435502	0.0372439
C3orf62	-1.7767	0.805889	-1.27807	chr3	49268595	49277232	16685	ENST00000343010.8	ENSG00000188315.8	ENSG00000188315	3	49268596	49277232	278.994	0.448763	0.12046	3.7254	0.000195003	0.00348741
ALX1	-1.87484	0.76606	-1.27801	chr12	85280219	85301784	14853	ENST00000316824.4	ENSG00000180318.4	ENSG00000180318	12	85280220	85301784	442.133	0.398627	0.112566	3.54128	0.000398186	0.00614311
ZSWIM3	-2.05122	0.694234	-1.27769	chr20	45857613	45879122	6665	ENST00000255152.3	ENSG00000132801.7	ENSG00000132801	20	45857614	45879122	232.051	0.673058	0.209724	3.20925	0.0013308	0.0159814
ZBTB21	-2.0583	0.681127	-1.26912	chr21	41986830	42010360	13498	ENST00000310826.10	ENSG00000173276.14	ENSG00000173276	21	41986831	42010387	596.651	0.682429	0.216736	3.14866	0.00164019	0.0186578
ZBTB48	-1.85651	0.758571	-1.26551	chr1	6579993	6589280	20049	ENST00000377674.9	ENSG00000204859.13	ENSG00000204859	1	6579994	6589280	1398.46	0.353806	0.100895	3.50667	0.000453758	0.00687265
ZKSCAN8	-2.23736	0.595351	-1.25802	chr6	28141882	28159460	17715	ENST00000330236.7	ENSG00000198315.11	ENSG00000198315	6	28141883	28159460	1255.56	0.462476	0.168042	2.75214	0.00592067	0.0462001
ITPKC	-1.90972	0.726523	-1.25672	chr19	40717111	40740860	1698	ENST00000263370.3	ENSG00000086544.4	ENSG00000086544	19	40717112	40740860	506.229	0.427724	0.127355	3.35852	0.000783618	0.0105106
ZNF629	-2.11032	0.640662	-1.25287	chr16	30778455	30787205	2715	ENST00000262525.6	ENSG00000102870.6	ENSG00000102870	16	30778456	30787205	2193.8	0.321261	0.108475	2.9616	0.00306041	0.0290135
GATAD1	-1.63435	0.831523	-1.25123	chr7	92447481	92460075	10092	ENST00000287957.5	ENSG00000157259.8	ENSG00000157259	7	92447482	92460075	1117.06	0.333301	0.0867089	3.8439	0.000121093	0.00235717
UTP23	-1.64093	0.82298	-1.24631	chr8	116766523	116774684	9023	ENST00000309822.7	ENSG00000147679.12	ENSG00000147679	8	116766505	116849463	597.195	0.440929	0.1159	3.80441	0.000142143	0.00268492
CUL7	-2.0647	0.650015	-1.24522	chr6	43037616	43053851	602	ENST00000265348.9	ENSG00000044090.13	ENSG00000044090	6	43037617	43053943	896.85	0.354957	0.118128	3.00484	0.00265719	0.0260976
ZNF84	-1.76485	0.771169	-1.24496	chr12	133037508	133063299	17630	ENST00000539354.6	ENSG00000198040.11	ENSG00000198040	12	133037292	133063304	424.413	0.424142	0.118977	3.5649	0.000363995	0.00571042
USP35	-2.1073	0.631875	-1.24449	chr11	78188918	78215232	4809	ENST00000529308.6	ENSG00000118369.13	ENSG00000118369	11	78188812	78215232	238.288	0.489717	0.167655	2.92098	0.00348927	0.031647
ZNF350	-1.65847	0.811973	-1.24304	chr19	51964339	51986840	45129	ENST00000243644.9	ENSG00000256683.7	ENSG00000256683	19	51964340	51986856	182.995	0.718633	0.191455	3.75353	0.000174363	0.00320876
ST3GAL1	-2.14321	0.612278	-1.24025	chr8	133454847	133571887	222	ENST00000522652.6	ENSG00000008513.17	ENSG00000008513	8	133454848	133571926	693.502	0.401362	0.141805	2.83039	0.00464909	0.0391075
MYSM1	-2.11807	0.605886	-1.22637	chr1	58654742	58700062	10780	ENST00000472487.6	ENSG00000162601.12	ENSG00000162601	1	58643440	58700090	830.757	0.730829	0.260932	2.80084	0.00509691	0.0414831
MOCS3	-1.80782	0.728607	-1.22389	chr20	50958817	50963929	5493	ENST00000244051.3	ENSG00000124217.5	ENSG00000124217	20	50958818	50963929	821.278	0.318604	0.0945932	3.36815	0.000756742	0.010265
PCGF1	-1.97017	0.662791	-1.22385	chr2	74505042	74507695	4408	ENST00000233630.11	ENSG00000115289.14	ENSG00000115289	2	74505043	74507695	647.32	0.443115	0.144625	3.0639	0.00218473	0.0227195
TRPS1	-2.09056	0.610872	-1.22121	chr8	115408495	115668975	2929	ENST00000395715.8	ENSG00000104447.13	ENSG00000104447	8	115408496	115809673	430.838	0.549411	0.194558	2.82389	0.00474442	0.0396619
TRAF2	-1.89345	0.683817	-1.21543	chr9	136886515	136926607	5900	ENST00000247668.7	ENSG00000127191.18	ENSG00000127191	9	136881912	136926607	1213.63	0.315271	0.0997348	3.1611	0.00157176	0.0180318
ZNF165	-2.00031	0.639162	-1.21428	chr6	28080567	28089563	17382	ENST00000683778.1	ENSG00000197279.5	ENSG00000197279	6	28080568	28089563	142.599	0.588649	0.199227	2.95467	0.00313004	0.029454
ZNF721	-1.76228	0.735253	-1.214	chr4	439987	499156	15363	ENST00000511833.3	ENSG00000182903.16	ENSG00000182903	4	425815	499156	533.755	0.484019	0.142406	3.39887	0.000676637	0.0095135
ANKS3	-1.6566	0.766522	-1.20433	chr16	4696510	4734271	12291	ENST00000304283.9	ENSG00000168096.15	ENSG00000168096	16	4696510	4734378	888.752	0.281036	0.079312	3.54342	0.000394973	0.00610228
TMEM138	-1.79814	0.70036	-1.19694	chr11	61362373	61369509	9224	ENST00000278826.11	ENSG00000149483.13	ENSG00000149483	11	61361964	61377890	1272.95	0.309856	0.0957062	3.23757	0.00120552	0.0147229
ADAMTS15	-1.71364	0.734308	-1.1967	chr11	130448644	130476645	11766	ENST00000299164.4	ENSG00000166106.4	ENSG00000166106	11	130448645	130476645	242.376	0.465329	0.137083	3.3945	0.000687536	0.00962908
FAM200A	-1.82969	0.68296	-1.19307	chr7	99546299	99552114	24267	ENST00000449309.2	ENSG00000221909.3	ENSG00000221909	7	99546300	99558536	372.364	0.393034	0.124491	3.15714	0.00159326	0.0182396
ZYG11A	-1.75342	0.711273	-1.1909	chr1	52842759	52894998	19726	ENST00000371528.2	ENSG00000203995.11	ENSG00000203995	1	52842511	52894998	571.364	0.51161	0.155598	3.28802	0.00100895	0.012907
ZNF440	-1.68928	0.735363	-1.18932	chr19	11814272	11835216	13032	ENST00000304060.10	ENSG00000171295.13	ENSG00000171295	19	11814273	11835216	316.415	0.537672	0.158167	3.39938	0.000675382	0.00950825
RNF122	-1.69718	0.727444	-1.18537	chr8	33547753	33567128	6807	ENST00000256257.2	ENSG00000133874.2	ENSG00000133874	8	33547754	33567128	383.788	0.446693	0.132835	3.36277	0.00077164	0.0103887
TRIM4	-1.99951	0.60198	-1.18286	chr7	99890402	99919530	8900	ENST00000349062.7	ENSG00000146833.16	ENSG00000146833	7	99876958	99919531	669.878	0.291648	0.104804	2.78279	0.0053894	0.0431433
TMEM51	-1.99791	0.602408	-1.18268	chr1	15153746	15220478	13138	ENST00000376008.3	ENSG00000171729.14	ENSG00000171729	1	15152532	15220478	301.697	0.414737	0.148931	2.78477	0.00535664	0.0429487
ZIC5	-1.7222	0.704839	-1.17492	chr13	99962963	99971767	7894	ENST00000267294.5	ENSG00000139800.9	ENSG00000139800	13	99962964	99971767	1433.81	0.381152	0.11698	3.25828	0.00112091	0.0138781
ZNF507	-1.7515	0.667349	-1.15346	chr19	32345609	32387667	12455	ENST00000355898.6	ENSG00000168813.17	ENSG00000168813	19	32345594	32387667	1063.28	0.537448	0.174215	3.08497	0.00203574	0.0216503
TRIM65	-1.62386	0.705741	-1.1423	chr17	75888962	75896951	8153	ENST00000269383.8	ENSG00000141569.12	ENSG00000141569	17	75880335	75896951	2592	0.283071	0.0867663	3.26245	0.00110455	0.0137704
ZNF710	-1.80028	0.632849	-1.14111	chr15	90001323	90082191	8004	ENST00000268154.9	ENSG00000140548.10	ENSG00000140548	15	90001324	90082206	742.913	0.277283	0.0947817	2.92549	0.00343917	0.0313243
MECOM	-1.63089	0.701177	-1.14086	chr3	169083506	169663712	1652	ENST00000651503.2	ENSG00000085276.19	ENSG00000085276	3	169083499	169663775	560.159	0.634085	0.195624	3.24135	0.00118965	0.0145621
WDR53	-1.61719	0.699642	-1.13493	chr3	196554176	196568554	16077	ENST00000332629.7	ENSG00000185798.8	ENSG00000185798	3	196554177	196568674	448.184	0.429002	0.132644	3.23425	0.00121962	0.0148447
MPP3	-1.81857	0.616445	-1.13357	chr17	43800810	43833146	10631	ENST00000398389.9	ENSG00000161647.19	ENSG00000161647	17	43800799	43833170	366.12	0.358463	0.125791	2.84966	0.00437664	0.0373991
PRDM2	-1.72727	0.65181	-1.13222	chr1	13700187	13825079	4618	ENST00000311066.10	ENSG00000116731.23	ENSG00000116731	1	13700188	13825079	1055.77	0.441204	0.146427	3.01314	0.00258561	0.0256279
EXOC8	-1.8148	0.612498	-1.12899	chr1	231332752	231337852	4648	ENST00000366645.1	ENSG00000116903.7	ENSG00000116903	1	231332753	231337852	1475.57	0.434555	0.153477	2.83141	0.00463433	0.0390839
NKTR	-1.69289	0.661587	-1.12874	chr3	42600685	42648735	4344	ENST00000232978.13	ENSG00000114857.19	ENSG00000114857	3	42600655	42648735	2181.2	0.34261	0.112025	3.05834	0.00222571	0.0230346
CSRNP2	-1.79276	0.615131	-1.12371	chr12	51061204	51083596	3834	ENST00000228515.6	ENSG00000110925.7	ENSG00000110925	12	51061205	51083664	911.605	0.334087	0.117488	2.84358	0.00446098	0.0378797
LUZP1	-1.68551	0.644533	-1.11195	chr1	23084029	23168856	12651	ENST00000302291.9	ENSG00000169641.15	ENSG00000169641	1	23084030	23177808	1286.01	0.471204	0.158149	2.9795	0.00288722	0.0278246
ESPL1	-1.72288	0.618382	-1.10272	chr12	53268298	53293638	7096	ENST00000257934.9	ENSG00000135476.12	ENSG00000135476	12	53268299	53293638	3140.49	0.365369	0.127813	2.85861	0.00425501	0.0366209
PCF11	-1.77021	0.594823	-1.09905	chr11	83157130	83185794	11617	ENST00000690938.1	ENSG00000165494.12	ENSG00000165494	11	83156988	83187451	761.473	0.627267	0.228122	2.7497	0.00596496	0.0464784
HERC2P9	-1.68348	0.622151	-1.09251	chr15	28590188	28674027	20383	ENST00000529624.5	ENSG00000206149.13	ENSG00000206149	15	28590189	28674027	327.939	0.372293	0.129447	2.87603	0.00402708	0.0350226
HERC2P9	-1.68348	0.622151	-1.09251	chr15	28654441	28685264	68909	ENST00000528584.5	ENSG00000291082.1	ENSG00000291082	15	28651421	28685264	327.939	0.372293	0.129447	2.87603	0.00402708	0.0350226
HERC2P9	-1.68348	0.622151	-1.09251	chr15_KI270905v1_alt	865979	949817	61070	ENST00000633515.1	ENSG00000282417.2	ENSG00000282417	HSCHR15_4_CTG8	865980	949817	327.939	0.372293	0.129447	2.87603	0.00402708	0.0350226
HERC2P9	-1.68348	0.622151	-1.09251	chr15_KI270905v1_alt	930232	961054	68348	ENST00000631810.1	ENSG00000290513.1	ENSG00000290513	HSCHR15_4_CTG8	887933	961057	327.939	0.372293	0.129447	2.87603	0.00402708	0.0350226
THAP3	-1.68957	0.614249	-1.08796	chr1	6624867	6633562	580	ENST00000054650.9	ENSG00000041988.16	ENSG00000041988	1	6624868	6635586	984.863	0.33524	0.118063	2.83951	0.00451835	0.0382824
NAA16	-1.66487	0.616348	-1.08133	chr13	41311266	41377030	13383	ENST00000379406.8	ENSG00000172766.19	ENSG00000172766	13	41311267	41377030	629.168	0.51618	0.181166	2.84921	0.00438285	0.0374226
MED18	-1.68935	0.588526	-1.06633	chr1	28329039	28335965	6345	ENST00000373842.9	ENSG00000130772.14	ENSG00000130772	1	28329002	28335965	715.254	0.268685	0.0987598	2.72059	0.00651648	0.0495163
MED18	-1.68935	0.588526	-1.06633	chr1_KZ208904v1_alt	122683	129609	63233	ENST00000645794.2	ENSG00000284944.2	ENSG00000284944	HSCHR1_8_CTG3	122646	129609	715.254	0.268685	0.0987598	2.72059	0.00651648	0.0495163
ZSWIM8	-1.67157	0.589257	-1.06091	chr10	73785605	73801793	23027	ENST00000604729.6	ENSG00000214655.11	ENSG00000214655	10	73785606	73801797	1638.54	0.297887	0.109358	2.72397	0.00645014	0.0493322
FOXD2	-1.62919	0.605418	-1.06007	chr1	47438043	47440691	16285	ENST00000334793.6	ENSG00000186564.6	ENSG00000186564	1	47438044	47440691	231.352	0.382535	0.136684	2.79868	0.00513119	0.0416938
PVR	-1.63556	0.593767	-1.05247	chr19	44643909	44666162	1216	ENST00000425690.8	ENSG00000073008.16	ENSG00000073008	19	44643798	44666162	2235.66	0.233926	0.0852245	2.74482	0.00605438	0.0469716
TFAP4	-1.58556	0.597271	0.201383	chr16	4257185	4273023	1879	ENST00000204517.11	ENSG00000090447.12	ENSG00000090447	16	4257186	4273075	1157.46	0.234111	0.0847915	2.76102	0.00576209	0.0453234
KIAA1586	-1.58451	0.608748	0.205334	chr6	57046692	57055225	12293	ENST00000370733.5	ENSG00000168116.14	ENSG00000168116	6	57046532	57055239	578.688	0.342179	0.121595	2.81407	0.00489179	0.0403002
GCC1	-1.58654	0.614238	0.207027	chr7	127580627	127585596	14711	ENST00000321407.3	ENSG00000179562.3	ENSG00000179562	7	127580628	127593611	1063.73	0.310009	0.109179	2.83946	0.00451906	0.0382824
RTTN	-1.51585	0.606748	0.210098	chr18	70003030	70205687	14048	ENST00000640769.2	ENSG00000176225.15	ENSG00000176225	18	70003031	70205726	467.47	0.432523	0.154207	2.80483	0.00503433	0.0411601
TMEM39A	-1.40544	0.588479	0.212868	chr3	119428948	119463615	14029	ENST00000319172.10	ENSG00000176142.13	ENSG00000176142	3	119428949	119468830	1104.73	0.279486	0.102738	2.72038	0.00652076	0.0495163
KLF5	-1.56751	0.632095	0.214585	chr13	73059004	73077538	2688	ENST00000377687.6	ENSG00000102554.14	ENSG00000102554	13	73054976	73077541	731.049	0.432812	0.148122	2.922	0.00347792	0.0315972
AGAP6	-1.38242	0.589268	0.215156	chr10	49988405	50010499	19773	ENST00000412531.7	ENSG00000204149.16	ENSG00000204149	10	49982190	50011654	705.671	0.299049	0.109782	2.72402	0.0064492	0.0493322
C17orf80	-1.51089	0.622694	0.216034	chr17	73232432	73248959	8087	ENST00000535032.7	ENSG00000141219.16	ENSG00000141219	17	73232233	73248959	1301.79	0.274145	0.0952375	2.87854	0.00399518	0.0348013
METTL18	-1.5345	0.633628	0.217833	chr1	169792528	169794907	13156	ENST00000310392.5	ENSG00000171806.12	ENSG00000171806	1	169792529	169794963	386.081	0.325094	0.110988	2.92909	0.00339959	0.0310425
SLC3A2	-1.45979	0.628881	0.222591	chr11	62880895	62888860	12264	ENST00000338663.12	ENSG00000168003.19	ENSG00000168003	11	62856004	62888880	8664.87	0.180199	0.0619848	2.90715	0.00364744	0.0326694
BBS12	-1.30839	0.592375	0.223028	chr4	122732703	122744939	14984	ENST00000314218.8	ENSG00000181004.10	ENSG00000181004	4	122732702	122744942	174.823	0.407453	0.148793	2.73839	0.00617415	0.047643
ZNF24	-1.36518	0.606793	0.223124	chr18	35332226	35344420	13326	ENST00000261332.11	ENSG00000172466.16	ENSG00000172466	18	35332227	35345482	5469.41	0.332055	0.118378	2.80504	0.00503107	0.0411601
CDCA2	-1.35823	0.605374	0.22324	chr8	25459232	25507911	15798	ENST00000330560.8	ENSG00000184661.14	ENSG00000184661	8	25459199	25507911	974.947	0.310164	0.110833	2.79848	0.0051344	0.0416938
KCTD21	-1.42606	0.622986	0.223487	chr11	78171248	78188626	16863	ENST00000340067.4	ENSG00000188997.8	ENSG00000188997	11	78171249	78188626	295.132	0.400169	0.138953	2.87989	0.00397808	0.0346804
KIAA0232	-1.55722	0.658497	0.224424	chr4	6782726	6884164	12927	ENST00000307659.6	ENSG00000170871.12	ENSG00000170871	4	6781375	6884170	531.738	0.432414	0.142052	3.04405	0.00233416	0.0239046
ISL1	-1.61102	0.672757	0.224679	chr5	51383447	51394730	367	ENST00000230658.12	ENSG00000016082.15	ENSG00000016082	5	51383448	51394730	879.647	0.275988	0.0887428	3.10997	0.00187105	0.0204847
ZNF235	-1.54414	0.656196	0.22476	chr19	44286347	44305025	10414	ENST00000291182.9	ENSG00000159917.17	ENSG00000159917	19	44228729	44305046	181.888	0.519643	0.171306	3.03342	0.00241802	0.0246232
MTF1	-1.48469	0.644293	0.225822	chr1	37809573	37859592	16811	ENST00000373036.5	ENSG00000188786.10	ENSG00000188786	1	37809574	37859592	516.172	0.403362	0.13543	2.97839	0.00289769	0.0279007
CEP85	-1.52217	0.655203	0.226323	chr1	26234199	26278808	6315	ENST00000451429.8	ENSG00000130695.16	ENSG00000130695	1	26234200	26278808	1875.69	0.30657	0.101218	3.02882	0.00245509	0.0248132
ZNF124	-1.30951	0.605032	0.227686	chr1	247154988	247172020	17110	ENST00000543802.3	ENSG00000196418.13	ENSG00000196418	1	247121975	247172020	241.33	0.380329	0.135983	2.7969	0.00515962	0.0418671
CDYL	-1.31412	0.610297	0.229223	chr6	4776403	4955544	9623	ENST00000397588.8	ENSG00000153046.18	ENSG00000153046	6	4706159	4955551	850.682	0.288123	0.102126	2.82123	0.00478393	0.0397763
USP54	-1.22692	0.588513	0.229439	chr10	73497537	73591342	11839	ENST00000687698.1	ENSG00000166348.20	ENSG00000166348	10	73497538	73626117	1105.07	0.257189	0.0945365	2.72053	0.0065177	0.0495163
FBXL12	-1.4136	0.636702	0.229554	chr19	9810269	9819079	5925	ENST00000247977.9	ENSG00000127452.9	ENSG00000127452	19	9810267	9827816	1209.96	0.300069	0.10195	2.9433	0.00324736	0.0300082
KLF4	-1.4841	0.655579	0.229831	chr9	107484851	107489769	7346	ENST00000374672.5	ENSG00000136826.15	ENSG00000136826	9	107484852	107490482	212.456	0.465077	0.153462	3.03056	0.00244099	0.0247636
ZNF614	-1.23153	0.591021	0.229956	chr19	52013323	52028379	8263	ENST00000270649.11	ENSG00000142556.19	ENSG00000142556	19	52012765	52030240	440.977	0.583679	0.213635	2.73213	0.00629269	0.0483458
CCDC71	-1.42069	0.639858	0.230035	chr3	49162534	49166331	14285	ENST00000321895.7	ENSG00000177352.10	ENSG00000177352	3	49162535	49166331	1536.66	0.308366	0.104252	2.95789	0.00309755	0.0292761
ATR	-1.35602	0.623883	0.230275	chr3	142449234	142578733	13821	ENST00000350721.9	ENSG00000175054.16	ENSG00000175054	3	142449007	142578733	1063.26	0.452578	0.156925	2.88404	0.00392608	0.0343464
NKRF	-1.29781	0.611576	0.231286	chrX	119589351	119605995	16245	ENST00000688521.1	ENSG00000186416.18	ENSG00000186416	X	119588337	119606443	3650.7	0.251507	0.0889613	2.82715	0.00469647	0.0393939
NKRF	-1.29781	0.611576	0.231286	chrX_MU273394v1_fix	39343	57426	69991	ENST00000710306.1	ENSG00000292244.1	ENSG00000292244	HG2541_PATCH	39338	57426	3650.7	0.251507	0.0889613	2.82715	0.00469647	0.0393939
SLC29A2	-1.31388	0.617025	0.231774	chr11	66362520	66371760	13746	ENST00000357440.7	ENSG00000174669.12	ENSG00000174669	11	66362521	66372214	1917.03	0.260978	0.0914962	2.85234	0.00433989	0.0371476
ALS2	-1.31618	0.6179	0.231878	chr2	201700266	201780933	38	ENST00000264276.11	ENSG00000003393.16	ENSG00000003393	2	201700267	201782112	977.305	0.368245	0.12892	2.85638	0.00428501	0.036791
ZNF346	-1.45016	0.654532	0.232557	chr5	177022695	177067985	4235	ENST00000358149.8	ENSG00000113761.12	ENSG00000113761	5	177022696	177081189	1805.13	0.220728	0.0729505	3.02572	0.0024804	0.0249987
NAA30	-1.31884	0.628227	0.23549	chr14	57390585	57415906	7915	ENST00000556492.6	ENSG00000139977.14	ENSG00000139977	14	57390544	57415906	986.945	0.315491	0.108636	2.90412	0.00368288	0.0328507
JADE1	-1.24434	0.611557	0.236628	chr4	128809699	128875224	1395	ENST00000226319.11	ENSG00000077684.16	ENSG00000077684	4	128809700	128875224	1510.73	0.229308	0.0811117	2.82706	0.00469775	0.0393939
S100PBP	-1.18298	0.596786	0.237207	chr1	32817652	32858875	4582	ENST00000373475.10	ENSG00000116497.18	ENSG00000116497	1	32816767	32858875	741.404	0.220354	0.0798739	2.75878	0.00580178	0.045536
ANKZF1	-1.19339	0.600628	0.237635	chr2	219229805	219236679	11040	ENST00000323348.10	ENSG00000163516.14	ENSG00000163516	2	219229783	219236679	1090.17	0.242912	0.0874872	2.77654	0.00549411	0.0437645
CKAP2L	-1.42938	0.663638	0.237754	chr2	112736348	112764609	12643	ENST00000302450.11	ENSG00000169607.13	ENSG00000169607	2	112736349	112764664	746.428	0.359155	0.117072	3.06781	0.0021563	0.0225325
ZNF100	-1.56505	0.700387	0.237991	chr19	21722770	21767579	17296	ENST00000358296.11	ENSG00000197020.12	ENSG00000197020	19	21722771	21767579	307.509	0.504757	0.1559	3.2377	0.00120498	0.0147229
ZNF100	-1.56505	0.700387	0.237991	chr19_GL383575v2_alt	83955	128716	55350	ENST00000614218.4	ENSG00000274746.4	ENSG00000274746	HSCHR19_2_CTG2	83956	128739	307.509	0.504757	0.1559	3.2377	0.00120498	0.0147229
ZNF316	-1.45321	0.670689	0.238009	chr7	6637317	6658279	20330	ENST00000382252.6	ENSG00000205903.7	ENSG00000205903	7	6637318	6658279	1305.49	0.310667	0.100202	3.10041	0.00193252	0.020945
DDX12P	-1.27897	0.626844	0.238964	chr12	9418672	9448229	23087	ENST00000432996.2	ENSG00000214826.5	ENSG00000214826	12	9418673	9448229	1434.09	0.340368	0.11746	2.89773	0.00375878	0.0333894
CCDC18	-1.21632	0.610558	0.239139	chr1	93180723	93278730	5275	ENST00000690025.1	ENSG00000122483.18	ENSG00000122483	1	93179919	93278730	495.42	0.315169	0.111666	2.82244	0.00476594	0.0397156
TMEM79	-1.53034	0.694915	0.239286	chr1	156284324	156292443	11024	ENST00000405535.3	ENSG00000163472.19	ENSG00000163472	1	156282935	156293185	284.636	0.526774	0.163981	3.2124	0.00131631	0.0158251
SOX13	-1.30364	0.636196	0.240006	chr1	204073114	204127743	8486	ENST00000367204.6	ENSG00000143842.15	ENSG00000143842	1	204073115	204127743	461.838	0.30683	0.10433	2.94096	0.00327197	0.0301832
ZNF282	-1.55592	0.705158	0.240445	chr7	149195545	149226238	12786	ENST00000610704.5	ENSG00000170265.12	ENSG00000170265	7	149195546	149226238	4099.11	0.222653	0.0683036	3.25975	0.0011151	0.0138221
KDM2A	-1.15428	0.597436	0.240531	chr11	67119262	67258082	13457	ENST00000529006.7	ENSG00000173120.15	ENSG00000173120	11	67119263	67258082	2318.49	0.387181	0.140192	2.76178	0.00574869	0.045284
SERTAD1	-1.40596	0.665358	0.240626	chr19	40421588	40425992	17295	ENST00000357949.5	ENSG00000197019.5	ENSG00000197019	19	40421589	40425992	553.329	0.324579	0.105528	3.07577	0.00209963	0.0221117
ZBTB40	-1.44775	0.677199	0.240841	chr1	22451850	22531154	15802	ENST00000375647.5	ENSG00000184677.18	ENSG00000184677	1	22428838	22531157	1357.07	0.406489	0.129848	3.1305	0.00174508	0.0195014
HINFP	-1.51345	0.70318	0.243715	chr11	119121579	119136059	13272	ENST00000350777.7	ENSG00000172273.13	ENSG00000172273	11	119121580	119136059	820.551	0.310358	0.0954768	3.25061	0.00115158	0.0141587
SOCS6	-1.45356	0.688829	0.244412	chr18	70289044	70330199	12889	ENST00000397942.4	ENSG00000170677.6	ENSG00000170677	18	70289045	70330199	343.099	0.5575	0.17508	3.18427	0.00145121	0.0170849
ZNF592	-1.22217	0.62597	0.244549	chr15	84748591	84806445	11927	ENST00000560079.7	ENSG00000166716.10	ENSG00000166716	15	84748592	84806445	2047.44	0.377719	0.130532	2.89369	0.00380747	0.0336832
SSH2	-1.52373	0.708713	0.244659	chr17	29625937	29930228	8096	ENST00000540801.6	ENSG00000141298.19	ENSG00000141298	17	29625938	29930276	513.275	0.568841	0.173629	3.27618	0.0010522	0.0132917
RNF146	-1.21297	0.625445	0.24533	chr6	127266863	127288562	4830	ENST00000368314.6	ENSG00000118518.17	ENSG00000118518	6	127266726	127288567	662.158	0.35186	0.121698	2.89126	0.00383699	0.0338646
ARHGEF3	-1.50129	0.705431	0.245653	chr3	56727419	56801949	11195	ENST00000296315.8	ENSG00000163947.12	ENSG00000163947	3	56727418	57079329	362.505	0.510198	0.156454	3.26101	0.00111015	0.013792
GEN1	-1.06197	0.587418	0.246748	chr2	17754137	17788946	14476	ENST00000381254.7	ENSG00000178295.15	ENSG00000178295	2	17753858	17788946	1041.13	0.339703	0.125099	2.71547	0.0066181	0.0499438
XYLT2	-1.22233	0.632914	0.247245	chr17	50346125	50361185	363	ENST00000017003.7	ENSG00000015532.10	ENSG00000015532	17	50346126	50363138	879.65	0.283531	0.0969074	2.92579	0.00343584	0.0313204
ZBTB45	-1.45945	0.702886	0.248818	chr19	58513529	58519810	4926	ENST00000594051.6	ENSG00000119574.13	ENSG00000119574	19	58513530	58538911	584.888	0.330796	0.101807	3.24925	0.0011571	0.0141959
ZNF684	-1.45768	0.703118	0.249075	chr1	40531636	40548167	4664	ENST00000372699.8	ENSG00000117010.17	ENSG00000117010	1	40531573	40548167	156.004	0.552097	0.169859	3.25032	0.00115276	0.0141587
PRKAB2	-1.3872	0.684468	0.249428	chr1	147155105	147172470	6504	ENST00000254101.4	ENSG00000131791.8	ENSG00000131791	1	147155106	147172550	1128.02	0.32827	0.103748	3.16411	0.0015556	0.0179524
COA7	-1.39995	0.690224	0.250227	chr1	52684448	52698347	10722	ENST00000371538.5	ENSG00000162377.6	ENSG00000162377	1	52684449	52698347	1459.47	0.320382	0.100411	3.19072	0.0014192	0.0168368
RNF19A	-1.59748	0.748008	0.25108	chr8	100257066	100309953	513	ENST00000341084.7	ENSG00000034677.13	ENSG00000034677	8	100257060	100336218	411.276	0.558609	0.161549	3.45784	0.000544532	0.00798943
ZIC3	-1.33505	0.676137	0.25174	chrX	137566126	137572102	10046	ENST00000287538.10	ENSG00000156925.12	ENSG00000156925	X	137566127	137577691	1036.63	0.384301	0.122953	3.1256	0.00177446	0.0197499
IQGAP3	-1.09381	0.609171	0.252117	chr1	156525404	156572565	15614	ENST00000361170.7	ENSG00000183856.11	ENSG00000183856	1	156525405	156572604	1551.16	0.369142	0.131086	2.81603	0.00486209	0.0401169
IQGAP3	-1.09381	0.609171	0.252117	chr1_MU273335v1_fix	83961	131122	69532	ENST00000708577.1	ENSG00000291754.1	ENSG00000291754	HG2515_PATCH	83962	131161	1551.16	0.369142	0.131086	2.81603	0.00486209	0.0401169
CBFA2T2	-1.41453	0.703345	0.253486	chr20	33490095	33650030	1436	ENST00000342704.11	ENSG00000078699.22	ENSG00000078699	20	33490075	33650036	521.353	0.43071	0.13247	3.25137	0.0011485	0.0141386
SALL1	-1.19846	0.643328	0.25396	chr16	51135981	51151270	2822	ENST00000251020.9	ENSG00000103449.13	ENSG00000103449	16	51135982	51152334	1065.43	0.483484	0.162574	2.97393	0.00294015	0.0282338
HOXA11	-1.61493	0.76529	0.255209	chr7	27181156	27185232	78	ENST00000006015.4	ENSG00000005073.6	ENSG00000005073	7	27181157	27185232	1417.76	0.271154	0.0766463	3.53773	0.000403587	0.00621754
RHOU	-1.17276	0.641484	0.256136	chr1	228735478	228746664	4589	ENST00000366691.4	ENSG00000116574.6	ENSG00000116574	1	228735479	228746664	539.271	0.338288	0.114078	2.9654	0.00302287	0.0287973
RHOU	-1.17276	0.641484	0.256136	chr1_KZ208906v1_fix	312482	323668	63269	ENST00000646945.2	ENSG00000284984.2	ENSG00000284984	HG2002_PATCH	312483	323668	539.271	0.338288	0.114078	2.9654	0.00302287	0.0287973
ZNF384	-1.31714	0.687978	0.258072	chr12	6666476	6689375	5850	ENST00000683879.1	ENSG00000126746.19	ENSG00000126746	12	6666477	6689572	2461.37	0.19477	0.061242	3.18034	0.00147105	0.0172997
MADD	-1.49344	0.740119	0.258522	chr11	47269673	47330031	3791	ENST00000349238.7	ENSG00000110514.20	ENSG00000110514	11	47269161	47330031	1482.45	0.443196	0.129538	3.42136	0.000623077	0.00886446
PIAS1	-1.29605	0.684582	0.259089	chr15	68054314	68193847	506	ENST00000249636.11	ENSG00000033800.14	ENSG00000033800	15	68054309	68198603	770.23	0.354968	0.112167	3.16463	0.00155278	0.0179524
ZNF521	-1.17901	0.652227	0.259702	chr18	25061923	25352166	17882	ENST00000361524.8	ENSG00000198795.11	ENSG00000198795	18	25061924	25352190	238.544	0.453749	0.150494	3.01507	0.00256922	0.0255468
PAXBP1	-1.44666	0.731029	0.260097	chr21	32733898	32771755	10305	ENST00000331923.9	ENSG00000159086.15	ENSG00000159086	21	32733899	32771792	1996.51	0.31497	0.0932046	3.37934	0.00072659	0.00998087
PAXBP1	-1.44666	0.731029	0.260097	chr21_GL383580v2_alt	735	2780	49083	ENST00000574159.2	ENSG00000263141.5	ENSG00000263141	HSCHR21_3_CTG1_1	736	2780	1996.51	0.31497	0.0932046	3.37934	0.00072659	0.00998087
WDR37	-0.998772	0.603574	0.261287	chr10	1056384	1132372	614	ENST00000263150.9	ENSG00000047056.18	ENSG00000047056	10	1049538	1160991	505.047	0.34508	0.123678	2.79016	0.00526827	0.042487
ZNF497	-1.15985	0.650811	0.261366	chr19	58354356	58362751	13736	ENST00000311044.8	ENSG00000174586.11	ENSG00000174586	19	58354357	58362848	107.964	0.555281	0.18457	3.00852	0.00262524	0.0259255
PPP1R13B	-1.24322	0.675383	0.26145	chr14	103733194	103847575	1787	ENST00000202556.14	ENSG00000088808.18	ENSG00000088808	14	103733195	103847575	884.174	0.355987	0.114021	3.12211	0.00179561	0.0198808
ELF2	-1.58235	0.775965	0.26195	chr4	139057264	139177218	3666	ENST00000686138.1	ENSG00000109381.21	ENSG00000109381	4	139028112	139177218	910.386	0.432194	0.120487	3.58707	0.000334413	0.00533428
PISD	-1.10369	0.636083	0.262057	chr22	31618490	31662215	37780	ENST00000439502.7	ENSG00000241878.12	ENSG00000241878	22	31618491	31662221	2063.79	0.227498	0.0773688	2.94044	0.0032775	0.0301832
GATA4	-1.21896	0.671152	0.262569	chr8	11704201	11760002	7307	ENST00000532059.6	ENSG00000136574.19	ENSG00000136574	8	11676959	11760002	1468.67	0.229203	0.0738756	3.10255	0.00191861	0.0208372
GATA4	-1.21896	0.671152	0.262569	chr8_KZ208915v1_fix	1588082	1671110	63380	ENST00000646696.1	ENSG00000285109.4	ENSG00000285109	HG76_PATCH	1588081	1671110	1468.67	0.229203	0.0738756	3.10255	0.00191861	0.0208372
MBD4	-1.20767	0.668525	0.262838	chr3	129430946	129439948	6106	ENST00000429544.7	ENSG00000129071.10	ENSG00000129071	3	129430947	129440179	1052.47	0.358122	0.115882	3.09041	0.00199882	0.0214908
NPAT	-0.925319	0.588569	0.26418	chr11	108157214	108222638	9207	ENST00000278612.9	ENSG00000149308.17	ENSG00000149308	11	108157215	108222638	587.281	0.494439	0.181726	2.72079	0.00651256	0.0495163
VARS2	-1.23719	0.685096	0.265904	chr6	30914237	30926459	7476	ENST00000676266.1	ENSG00000137411.19	ENSG00000137411	6	30914205	30926459	2206.71	0.197903	0.0624887	3.16701	0.00154014	0.0178975
VARS2	-1.23719	0.685096	0.265904	chr6_GL000251v2_alt	2393950	2406057	34745	ENST00000383369.7	ENSG00000236178.11	ENSG00000236178	HSCHR6_MHC_COX_CTG1	2393951	2406057	2206.71	0.197903	0.0624887	3.16701	0.00154014	0.0178975
VARS2	-1.23719	0.685096	0.265904	chr6_GL000252v2_alt	2170508	2182776	30721	ENST00000428577.6	ENSG00000230985.11	ENSG00000230985	HSCHR6_MHC_DBB_CTG1	2170509	2182776	2206.71	0.197903	0.0624887	3.16701	0.00154014	0.0178975
VARS2	-1.23719	0.685096	0.265904	chr6_GL000253v2_alt	2224440	2236697	24890	ENST00000415079.6	ENSG00000223494.11	ENSG00000223494	HSCHR6_MHC_MANN_CTG1	2224441	2236697	2206.71	0.197903	0.0624887	3.16701	0.00154014	0.0178975
VARS2	-1.23719	0.685096	0.265904	chr6_GL000254v2_alt	2258351	2270615	33078	ENST00000450090.6	ENSG00000234032.11	ENSG00000234032	HSCHR6_MHC_MCF_CTG1	2258352	2270615	2206.71	0.197903	0.0624887	3.16701	0.00154014	0.0178975
VARS2	-1.23719	0.685096	0.265904	chr6_GL000255v2_alt	2169370	2181636	20509	ENST00000383540.7	ENSG00000206476.15	ENSG00000206476	HSCHR6_MHC_QBL_CTG1	2169371	2181636	2206.71	0.197903	0.0624887	3.16701	0.00154014	0.0178975
PKD2	-1.19523	0.673502	0.266251	chr4	88007634	88077777	4850	ENST00000237596.7	ENSG00000118762.8	ENSG00000118762	4	88007635	88077777	541.076	0.469391	0.150764	3.11342	0.00184935	0.0202883
SPTY2D1	-0.926034	0.593444	0.266273	chr11	18606402	18634342	14633	ENST00000336349.6	ENSG00000179119.15	ENSG00000179119	11	18606403	18634791	931.442	0.440829	0.160691	2.74333	0.00608202	0.0471521
RN7SL1	0.907106	-0.591003	0.267719	chr14	49586579	49586878	56451	ENST00000618786.1	ENSG00000276168.1	ENSG00000276168	14	49586580	49586878	343.277	-0.760127	0.278226	-2.73204	0.00629428	0.0483458
ATXN7L2	-1.18609	0.676131	0.268374	chr1	109483904	109492734	10800	ENST00000683729.1	ENSG00000162650.17	ENSG00000162650	1	109483479	109492804	956.499	0.33162	0.106099	3.12557	0.00177463	0.0197499
SPRTN	-1.14671	0.666085	0.269087	chr1	231338292	231355023	247	ENST00000295050.12	ENSG00000010072.16	ENSG00000010072	1	231337104	231355023	1737.71	0.368019	0.119521	3.07913	0.00207608	0.0219073
TBC1D31	-1.19698	0.681631	0.269256	chr8	123072706	123152153	10031	ENST00000287380.6	ENSG00000156787.17	ENSG00000156787	8	123041968	123152153	667.731	0.342929	0.108832	3.15099	0.00162715	0.0185685
CSNK1G1	-1.10338	0.653463	0.269256	chr15	64165524	64356173	12530	ENST00000303052.13	ENSG00000169118.18	ENSG00000169118	15	64165525	64356173	428.398	0.518296	0.171577	3.02078	0.00252125	0.0253158
URGCP	-1.30117	0.714406	0.269792	chr7	43875912	43906596	3338	ENST00000453200.6	ENSG00000106608.17	ENSG00000106608	7	43875894	43926411	1361.41	0.304693	0.0922611	3.3025	0.000958256	0.0123758
CEP290	-1.09061	0.652994	0.270654	chr12	88049015	88142088	17836	ENST00000552810.6	ENSG00000198707.17	ENSG00000198707	12	88049016	88142099	499.138	0.375614	0.124433	3.01861	0.00253935	0.0253894
RHPN1	-1.08458	0.652908	0.271376	chr8	143368875	143384221	10189	ENST00000289013.11	ENSG00000158106.14	ENSG00000158106	8	143368876	143384221	591.812	0.254478	0.0843143	3.01821	0.00254271	0.0253894
ZNF140	-1.32819	0.728171	0.271889	chr12	133080922	133107428	17096	ENST00000355557.7	ENSG00000196387.10	ENSG00000196387	12	133080474	133107526	306.436	0.375925	0.111679	3.36613	0.0007623	0.0102887
EPC2	-1.10172	0.659794	0.272072	chr2	148644750	148787569	7199	ENST00000258484.11	ENSG00000135999.12	ENSG00000135999	2	148644440	148787569	568.402	0.597826	0.196006	3.05005	0.00228806	0.0235443
HAUS3	-1.45071	0.766893	0.272418	chr4	2228348	2242121	22943	ENST00000443786.3	ENSG00000214367.10	ENSG00000214367	4	2227464	2242133	786.481	0.37886	0.106868	3.54514	0.00039241	0.00607137
STIL	-1.29146	0.72436	0.274677	chr1	47250138	47314147	5398	ENST00000371877.8	ENSG00000123473.17	ENSG00000123473	1	47250139	47314892	1381.48	0.476672	0.142353	3.34852	0.000812457	0.0107901
ABCD4	-1.28891	0.724799	0.275141	chr14	74285268	74302934	4948	ENST00000356924.9	ENSG00000119688.21	ENSG00000119688	14	74285269	74303055	1461.33	0.287927	0.0859342	3.35055	0.000806518	0.0107509
SDHAP1	-1.37047	0.750139	0.275235	chr3	195963334	195990258	16002	ENST00000440850.5	ENSG00000185485.15	ENSG00000185485	3	195963335	195990258	120.245	0.758018	0.218595	3.46769	0.000524957	0.00776423
SDHAP1	-1.37047	0.750139	0.275235	chr3	195959920	195990279	68592	ENST00000427841.5	ENSG00000290763.1	ENSG00000290763	3	195959748	195990318	120.245	0.758018	0.218595	3.46769	0.000524957	0.00776423
TBX2	-1.44999	0.774897	0.275341	chr17	61399842	61409466	5141	ENST00000240328.4	ENSG00000121068.14	ENSG00000121068	17	61399843	61409466	813.209	0.315122	0.0879704	3.58214	0.000340795	0.00540461
CDT1	-0.9535	0.62433	0.276325	chr16	88803788	88809258	12113	ENST00000301019.9	ENSG00000167513.9	ENSG00000167513	16	88803789	88809258	5955.7	0.234144	0.081128	2.88611	0.0039004	0.0341689
AASDH	-0.909906	0.611728	0.276715	chr4	56338289	56387491	10110	ENST00000205214.11	ENSG00000157426.14	ENSG00000157426	4	56338287	56387508	523.976	0.296758	0.104941	2.82785	0.00468619	0.0393582
C3orf52	-0.866899	0.599008	0.276984	chr3	112086388	112118210	4305	ENST00000264848.10	ENSG00000114529.13	ENSG00000114529	3	112086335	112131004	414.513	0.260778	0.0941758	2.76905	0.00562198	0.0445463
POLD3	-0.992366	0.637907	0.277008	chr11	74592581	74643076	1390	ENST00000263681.7	ENSG00000077514.9	ENSG00000077514	11	74493851	74669117	1187.72	0.272889	0.0925403	2.94887	0.0031894	0.0296794
MANBA	-1.02184	0.647504	0.27721	chr4	102630769	102760968	3663	ENST00000647097.2	ENSG00000109323.11	ENSG00000109323	4	102630770	102760994	370.206	0.464563	0.155205	2.99323	0.00276041	0.0268909
ZNF33A	-1.4317	0.775887	0.27771	chr10	38010674	38060087	16913	ENST00000432900.7	ENSG00000189180.16	ENSG00000189180	10	38010650	38065088	1030.76	0.247305	0.0689504	3.58671	0.000334876	0.00533428
ZNF45	-1.17728	0.697804	0.278063	chr19	43912623	43935282	5532	ENST00000269973.10	ENSG00000124459.12	ENSG00000124459	19	43912624	43935282	531.989	0.467181	0.144828	3.22576	0.00125641	0.0152408
CNTROB	-1.19722	0.704101	0.278103	chr17	7932205	7949920	12743	ENST00000563694.6	ENSG00000170037.14	ENSG00000170037	17	7932101	7949920	1921.53	0.204938	0.0629635	3.25487	0.00113445	0.0139977
OTUD7B	-1.59025	0.82638	0.27814	chr1	149937811	150010726	49767	ENST00000581312.6	ENSG00000264522.6	ENSG00000264522	1	149937812	150010726	1022.53	0.49525	0.129642	3.82013	0.000133382	0.00254583
SHPRH	-1.05779	0.662071	0.278654	chr6	145884806	145964358	8856	ENST00000275233.12	ENSG00000146414.17	ENSG00000146414	6	145864245	145964423	1042.4	0.649597	0.212247	3.06057	0.00220916	0.0229073
SS18L1	-1.05752	0.662402	0.278828	chr20	62143768	62182514	15738	ENST00000331758.8	ENSG00000184402.15	ENSG00000184402	20	62143769	62182514	630.94	0.332521	0.108592	3.0621	0.0021979	0.0228124
PHF3	-1.08924	0.674104	0.279581	chr6	63635801	63726011	4819	ENST00000262043.8	ENSG00000118482.12	ENSG00000118482	6	63635802	63779336	1920.87	0.290138	0.0931064	3.1162	0.001832	0.0201184
CAD	-1.06662	0.667585	0.279812	chr2	27217368	27243943	1644	ENST00000264705.9	ENSG00000084774.14	ENSG00000084774	2	27217369	27243943	6125.36	0.318981	0.103362	3.08606	0.00202827	0.0215922
ABCA7	-0.832349	0.59476	0.28002	chr19	1040106	1065572	896	ENST00000263094.11	ENSG00000064687.13	ENSG00000064687	19	1039997	1065572	410.131	0.404078	0.146969	2.74941	0.00597022	0.0464858
CASP8AP2	-1.26767	0.731088	0.280051	chr6	89829938	89871388	4812	ENST00000551025.4	ENSG00000118412.13	ENSG00000118412	6	89829894	89874436	607.503	0.718456	0.212585	3.37962	0.000725868	0.00998087
CASP8AP2	-1.26767	0.731088	0.280051	chr6_KV766194v1_fix	25283	72124	66623	ENST00000671703.2	ENSG00000288475.4	ENSG00000288475	HG2121_PATCH	25276	72124	607.503	0.718456	0.212585	3.37962	0.000725868	0.00998087
ANKRD49	-1.26642	0.731044	0.280184	chr11	94493983	94499578	12467	ENST00000544612.6	ENSG00000168876.9	ENSG00000168876	11	94493979	94499578	673.575	0.345678	0.102289	3.37941	0.000726406	0.00998087
ERRFI1	-1.40236	0.775759	0.280962	chr1	8011726	8026309	4568	ENST00000377482.10	ENSG00000116285.13	ENSG00000116285	1	8004404	8026309	839.963	0.453328	0.126412	3.58612	0.000335636	0.0053385
USP36	-0.997168	0.650127	0.281658	chr17	78795651	78840814	750	ENST00000449938.7	ENSG00000055483.20	ENSG00000055483	17	78787381	78841441	1501.65	0.654446	0.21776	3.00536	0.0026527	0.0260772
CKMT1B	0.856651	-0.606275	0.281837	chr15	43594026	43599406	35612	ENST00000441322.6	ENSG00000237289.10	ENSG00000237289	15	43593054	43604901	793.191	-0.577358	0.206005	-2.80264	0.00506855	0.0412834
ORC6	-1.03791	0.66383	0.282031	chr16	46689658	46698394	1939	ENST00000219097.7	ENSG00000091651.9	ENSG00000091651	16	46689643	46698394	2323.07	0.261252	0.0851342	3.0687	0.00214989	0.0224873
HCN3	-1.41909	0.785344	0.282519	chr1	155277462	155289848	8453	ENST00000368358.4	ENSG00000143630.10	ENSG00000143630	1	155277463	155289848	538.247	0.304929	0.0839926	3.63043	0.000282948	0.00466562
HCN3	-1.41909	0.785344	0.282519	chr1_GL383519v1_alt	82605	94871	49155	ENST00000575670.1	ENSG00000263324.5	ENSG00000263324	HSCHR1_2_CTG31	82606	94871	538.247	0.304929	0.0839926	3.63043	0.000282948	0.00466562
TRIM38	-0.79386	0.588498	0.282799	chr6	25962801	25991231	4059	ENST00000357085.5	ENSG00000112343.11	ENSG00000112343	6	25962802	25991231	141.242	0.433411	0.159315	2.72047	0.00651899	0.0495163
PHRF1	-1.3276	0.758018	0.283104	chr11	576469	612222	1097	ENST00000264555.10	ENSG00000070047.13	ENSG00000070047	11	576470	612222	2369.55	0.475985	0.135836	3.50411	0.000458135	0.00690983
PHRF1	-1.3276	0.758018	0.283104	chr11_KI270832v1_alt	106141	142115	55377	ENST00000616346.2	ENSG00000274780.2	ENSG00000274780	HSCHR11_1_CTG8	106142	142115	2369.55	0.475985	0.135836	3.50411	0.000458135	0.00690983
STAT2	-1.34844	0.765099	0.283284	chr12	56341596	56360107	12870	ENST00000314128.9	ENSG00000170581.15	ENSG00000170581	12	56341597	56360203	704.574	0.365216	0.10326	3.53684	0.00040494	0.0062295
SPECC1L	-0.977753	0.649014	0.283845	chr22	24270830	24417738	2163	ENST00000314328.14	ENSG00000100014.20	ENSG00000100014	22	24270817	24417739	2481.82	0.199224	0.0664033	3.00021	0.00269792	0.0264014
RNF31	-0.850494	0.609351	0.284176	chr14	24147497	24160655	1960	ENST00000324103.11	ENSG00000092098.18	ENSG00000092098	14	24146683	24160660	1518.73	0.212419	0.0754099	2.81686	0.0048495	0.0400926
RNF31	-0.850494	0.609351	0.284176	chr14_KZ208920v1_fix	447864	461637	63416	ENST00000642631.1	ENSG00000285152.2	ENSG00000285152	HG1_PATCH	447661	461638	1518.73	0.212419	0.0754099	2.81686	0.0048495	0.0400926
FGF2	-1.05365	0.674929	0.28462	chr4	122826830	122898236	7725	ENST00000644866.2	ENSG00000138685.18	ENSG00000138685	4	122826682	122898236	207.023	0.46329	0.14849	3.12001	0.00180843	0.0199613
AKAP13	-0.848606	0.610024	0.28477	chr15	85380602	85749355	12902	ENST00000394518.7	ENSG00000170776.22	ENSG00000170776	15	85380571	85749358	997.464	0.451456	0.160092	2.81997	0.00480279	0.0398655
PHLPP1	-0.825554	0.603479	0.285144	chr18	62715540	62980433	1551	ENST00000262719.10	ENSG00000081913.14	ENSG00000081913	18	62715541	62980433	855.436	0.338662	0.121397	2.78972	0.00527541	0.042487
CCDC93	-1.23299	0.735006	0.285796	chr2	117915480	118014070	5686	ENST00000376300.7	ENSG00000125633.11	ENSG00000125633	2	117915478	118014133	1190.45	0.392543	0.115531	3.39773	0.000679479	0.00954101
TTC23	-0.782153	0.591137	0.285865	chr15	99136322	99249581	2860	ENST00000394132.7	ENSG00000103852.13	ENSG00000103852	15	99136323	99251223	624.42	0.269152	0.0984945	2.73267	0.00628241	0.0483235
GON4L	-0.906238	0.631685	0.286274	chr1	155749658	155857214	4590	ENST00000368331.6	ENSG00000116580.20	ENSG00000116580	1	155749659	155859400	1352.71	0.536129	0.183599	2.92011	0.0034991	0.0316563
ANKRD13D	-1.05432	0.682626	0.287775	chr11	67289302	67302484	13420	ENST00000511455.7	ENSG00000172932.16	ENSG00000172932	11	67289300	67302485	566.183	0.351225	0.111302	3.15559	0.00160172	0.018317
ZZEF1	-0.757808	0.587555	0.287921	chr17	4004444	4143030	1275	ENST00000381638.7	ENSG00000074755.15	ENSG00000074755	17	4004445	4143030	1729.64	0.427481	0.157388	2.71611	0.00660549	0.0498835
CNTRL	-0.983887	0.664937	0.289939	chr9	121074954	121177610	4902	ENST00000373855.7	ENSG00000119397.19	ENSG00000119397	9	121074660	121177729	346.474	0.54023	0.175752	3.07382	0.00211335	0.0221912
SCAF8	-0.949962	0.656113	0.290901	chr6	154733415	154834221	22304	ENST00000367178.8	ENSG00000213079.10	ENSG00000213079	6	154733378	154834244	2343.15	0.438864	0.144695	3.03303	0.00242112	0.0246315
ZMYND8	-0.887757	0.636823	0.291329	chr20	47209213	47356699	2432	ENST00000471951.7	ENSG00000101040.20	ENSG00000101040	20	47209214	47356889	1152.39	0.365436	0.124135	2.94386	0.00324149	0.0299796
UPF2	-0.874512	0.632551	0.291348	chr10	11920021	12042809	9417	ENST00000357604.10	ENSG00000151461.20	ENSG00000151461	10	11920022	12043170	1073.01	0.356544	0.121932	2.92411	0.00345441	0.0314101
MARK3	-1.00288	0.676195	0.292143	chr14	103385414	103503831	1308	ENST00000429436.7	ENSG00000075413.19	ENSG00000075413	14	103385377	103503831	3264.49	0.174654	0.0558739	3.12586	0.00177284	0.0197499
NBPF11	-1.13032	0.718002	0.292224	chr1	148102150	148152281	49476	ENST00000682118.1	ENSG00000263956.8	ENSG00000263956	1	148102047	148152322	438.387	0.398748	0.120137	3.31912	0.000903001	0.0117893
KDM6A	-1.15192	0.726938	0.292982	chrX	44873187	45112779	8925	ENST00000611820.5	ENSG00000147050.18	ENSG00000147050	X	44873188	45112779	1016.78	0.669706	0.199292	3.36043	0.000778202	0.010451
ZNF805	-1.1027	0.711624	0.293312	chr19	57240631	57262728	19919	ENST00000414468.3	ENSG00000204524.7	ENSG00000204524	19	57240632	57262728	512.048	0.379301	0.115302	3.28964	0.00100316	0.0128682
FIP1L1	-0.771886	0.604359	0.29389	chr4	53377640	53460862	8679	ENST00000337488.11	ENSG00000145216.17	ENSG00000145216	4	53377569	53464382	1633.74	0.289762	0.103716	2.79379	0.00520948	0.0421448
CBLL1	-1.52558	0.851991	0.293911	chr7	107744141	107761667	3216	ENST00000440859.8	ENSG00000105879.13	ENSG00000105879	7	107743073	107761667	1195.59	0.451349	0.114598	3.93852	8.19856e-05	0.001737
CWC22	-1.35005	0.794472	0.293964	chr2	179944875	180007297	11036	ENST00000410053.8	ENSG00000163510.14	ENSG00000163510	2	179944876	180007297	807.639	0.344667	0.0938475	3.67263	0.000240071	0.0041094
GAS5	-1.10472	0.7145	0.294224	chr1	173858996	173867989	33629	ENST00000702964.1	ENSG00000234741.10	ENSG00000234741	1	173858559	173868882	3943	0.529099	0.160191	3.30294	0.000956785	0.0123717
UBAP1	-1.17005	0.737235	0.294725	chr9	34179042	34252523	11510	ENST00000297661.9	ENSG00000165006.14	ENSG00000165006	9	34179005	34252523	1935.24	0.239407	0.0702479	3.40803	0.000654325	0.00923592
PARP8	-0.716776	0.588022	0.294774	chr5	50666636	50846519	9481	ENST00000281631.10	ENSG00000151883.19	ENSG00000151883	5	50665899	50846519	383.255	0.311749	0.114687	2.71827	0.00656251	0.0496633
RBM15	-0.828376	0.624894	0.294823	chr1	110339376	110346677	10840	ENST00000369784.9	ENSG00000162775.17	ENSG00000162775	1	110338506	110346681	774.819	0.444875	0.154005	2.88871	0.00386822	0.0339975
AUNIP	-1.29655	0.779957	0.295123	chr1	25834005	25859457	5923	ENST00000374298.4	ENSG00000127423.11	ENSG00000127423	1	25831913	25859458	1012.09	0.433787	0.120312	3.60553	0.000311519	0.00505536
HERC2P2	-0.829619	0.628589	0.296372	chr15	22495569	22579813	56744	ENST00000613386.4	ENSG00000276550.6	ENSG00000276550	15	22495570	22579813	843.182	0.286615	0.0986357	2.90579	0.00366324	0.0327837
HERC2P2	-0.829619	0.628589	0.296372	chr15_KI270851v1_alt	139180	224046	59978	ENST00000629080.2	ENSG00000280787.3	ENSG00000280787	HSCHR15_3_CTG3	139181	224046	843.182	0.286615	0.0986357	2.90579	0.00366324	0.0327837
GPX3	0.890154	-0.651828	0.297828	chr5	151020590	151028988	21613	ENST00000388825.9	ENSG00000211445.13	ENSG00000211445	5	151020591	151028988	1081.23	-0.291787	0.0968357	-3.01322	0.00258492	0.0256279
LRP4	-0.727389	0.597682	0.297846	chr11	46856716	46918550	6929	ENST00000378623.6	ENSG00000134569.10	ENSG00000134569	11	46856717	46918642	568.923	0.464606	0.168158	2.76292	0.00572869	0.0451926
WT1	-0.812176	0.626035	0.297906	chr11	32387774	32435539	15857	ENST00000452863.10	ENSG00000184937.16	ENSG00000184937	11	32387775	32435564	285.853	0.348268	0.120342	2.89399	0.00380386	0.0336788
PPP1R37	-1.39617	0.820624	0.297957	chr19	45093178	45147285	2986	ENST00000221462.9	ENSG00000104866.11	ENSG00000104866	19	45091396	45148077	757.238	0.396155	0.10443	3.79352	0.000148528	0.0027856
GPATCH3	-0.848229	0.638364	0.298058	chr1	26890487	26900467	17859	ENST00000361720.10	ENSG00000198746.13	ENSG00000198746	1	26890488	26900467	914.397	0.334551	0.113369	2.95098	0.00316766	0.0296666
PDCD7	-1.36283	0.810506	0.298319	chr15	65117378	65133808	1880	ENST00000204549.9	ENSG00000090470.15	ENSG00000090470	15	65117379	65133808	670.334	0.403611	0.107723	3.74675	0.000179144	0.00325782
ASTE1	-1.58183	0.885524	0.298994	chr3	131013874	131026825	512	ENST00000264992.8	ENSG00000034533.12	ENSG00000034533	3	131013875	131027649	565.328	0.421792	0.103039	4.09353	4.2485e-05	0.00100916
DBF4B	-0.985299	0.687157	0.299422	chr17	44708664	44752264	10641	ENST00000315005.8	ENSG00000161692.18	ENSG00000161692	17	44708608	44752264	1720.77	0.228696	0.0719956	3.17654	0.00149045	0.0174328
ARL14EP	-1.49343	0.857542	0.299539	chr11	30323103	30338223	9519	ENST00000282032.4	ENSG00000152219.5	ENSG00000152219	11	30323104	30338223	834.443	0.341213	0.086074	3.96418	7.36485e-05	0.00158528
ZBTB46	-1.46191	0.84709	0.299575	chr20	63743669	63831264	6297	ENST00000245663.9	ENSG00000130584.12	ENSG00000130584	20	63743668	63832038	162.596	0.564247	0.144093	3.91586	9.00816e-05	0.00188264
GTPBP10	-0.786368	0.621186	0.299713	chr7	90346715	90391453	3198	ENST00000222511.11	ENSG00000105793.16	ENSG00000105793	7	90335223	90391453	987.417	0.311078	0.10833	2.87157	0.00408433	0.0354348
LPIN3	-1.06973	0.716238	0.299768	chr20	41340820	41360582	6664	ENST00000373257.8	ENSG00000132793.12	ENSG00000132793	20	41340821	41360582	645.383	0.326078	0.0984841	3.31097	0.000929732	0.0120944
ERC2	-0.831684	0.636863	0.299947	chr3	55508310	56468467	16515	ENST00000288221.11	ENSG00000187672.15	ENSG00000187672	3	55508311	56469095	125.213	0.639224	0.217124	2.94404	0.00323953	0.0299796
NSUN6	-0.922774	0.667766	0.300111	chr10	18545560	18651587	37432	ENST00000377304.7	ENSG00000241058.4	ENSG00000241058	10	18545561	18659285	418.342	0.309714	0.100332	3.0869	0.00202258	0.0215528
LMO7	-0.765742	0.615468	0.300294	chr13	75636329	75859866	7231	ENST00000377534.8	ENSG00000136153.20	ENSG00000136153	13	75620434	75859870	390.154	0.530911	0.186603	2.84514	0.00443918	0.0377243
ZNF75A	-1.2047	0.7635	0.300571	chr16	3305496	3318851	10692	ENST00000669516.2	ENSG00000162086.16	ENSG00000162086	16	3305406	3318852	514.279	0.478649	0.135616	3.52945	0.000416427	0.0063789
AKIRIN2	-1.54142	0.878613	0.301255	chr6	87674859	87702233	7057	ENST00000257787.6	ENSG00000135334.9	ENSG00000135334	6	87674860	87702233	1811.05	0.395333	0.0973347	4.06159	4.87406e-05	0.00113036
TERT	-1.09208	0.728228	0.301632	chr5	1253166	1295068	11345	ENST00000310581.10	ENSG00000164362.21	ENSG00000164362	5	1253147	1295068	165.966	0.511518	0.151948	3.3664	0.000761569	0.0102887
ZNF567	-1.50892	0.869361	0.301843	chr19	36687611	36721336	16872	ENST00000682579.1	ENSG00000189042.14	ENSG00000189042	19	36687612	36727701	158.901	0.718433	0.178767	4.01882	5.84912e-05	0.0013141
KANSL3	-0.964509	0.686537	0.302212	chr2	96593171	96638312	4356	ENST00000431828.6	ENSG00000114982.19	ENSG00000114982	2	96593170	96642787	2857.31	0.318722	0.100427	3.17367	0.00150523	0.0175485
EFNB2	-0.721883	0.604676	0.302258	chr13	106489744	106535662	5631	ENST00000646441.1	ENSG00000125266.8	ENSG00000125266	13	106489745	106535662	679.083	0.476307	0.170399	2.79525	0.00518595	0.0419859
CBLB	-1.01532	0.704503	0.302556	chr3	105655460	105869012	4294	ENST00000394030.8	ENSG00000114423.23	ENSG00000114423	3	105655461	105869552	246.405	0.386785	0.118765	3.25672	0.00112707	0.0139384
PPARA	-0.74639	0.613662	0.302607	chr22	46150525	46243755	16371	ENST00000407236.6	ENSG00000186951.17	ENSG00000186951	22	46150521	46243755	267.42	0.446899	0.157537	2.83679	0.00455695	0.0385731
FOXO1	-1.45125	0.852447	0.302744	chr13	40555666	40666641	9353	ENST00000379561.6	ENSG00000150907.10	ENSG00000150907	13	40555667	40666641	590.991	0.394268	0.100052	3.94063	8.12685e-05	0.0017252
TRMT5	-1.29675	0.800227	0.302767	chr14	60971440	60981079	5866	ENST00000261249.7	ENSG00000126814.7	ENSG00000126814	14	60971441	60981170	1379.94	0.293209	0.0792622	3.69923	0.000216254	0.00378585
TUBGCP6	-0.774385	0.625598	0.303805	chr22	50217693	50245023	5992	ENST00000248846.10	ENSG00000128159.12	ENSG00000128159	22	50217689	50245023	2498.06	0.385249	0.133213	2.89197	0.00382838	0.0338403
MTHFSD	-0.726802	0.6097	0.303934	chr16	86530185	86555235	2790	ENST00000360900.11	ENSG00000103248.19	ENSG00000103248	16	86530178	86555235	390.804	0.266816	0.0946666	2.81848	0.00482522	0.0399655
ZFYVE1	-1.422	0.845953	0.303967	chr14	72969450	73027106	11709	ENST00000556143.6	ENSG00000165861.14	ENSG00000165861	14	72969451	73027131	519.834	0.41476	0.10606	3.91061	9.20639e-05	0.00191294
TBP	-1.35041	0.823721	0.304741	chr6	170554368	170572859	4091	ENST00000392092.7	ENSG00000112592.15	ENSG00000112592	6	170554302	170572870	1514.53	0.291301	0.0765005	3.80784	0.000140187	0.00266045
NOD1	-1.10037	0.73868	0.304791	chr7	30424526	30478784	3264	ENST00000222823.9	ENSG00000106100.11	ENSG00000106100	7	30424527	30478784	232.802	0.452128	0.132406	3.41472	0.000638484	0.00904785
SETX	-0.778504	0.629288	0.304915	chr9	132261355	132354986	3411	ENST00000224140.6	ENSG00000107290.14	ENSG00000107290	9	132261356	132354986	1549.08	0.435733	0.149787	2.90902	0.0036256	0.0325821
AGPAT4	-0.818396	0.643011	0.304976	chr6	161129966	161274061	459	ENST00000320285.9	ENSG00000026652.15	ENSG00000026652	6	161129967	161274061	849.667	0.233381	0.0785142	2.97246	0.0029542	0.0283435
ARHGEF26	-0.891463	0.667989	0.305009	chr3	154121389	154257825	4336	ENST00000465093.6	ENSG00000114790.13	ENSG00000114790	3	154121003	154257827	1057.26	0.404589	0.131023	3.08793	0.00201556	0.0215528
ARHGEF26	-0.891463	0.667989	0.305009	chr3_KI270777v1_alt	24217	163780	57155	ENST00000629129.2	ENSG00000277101.4	ENSG00000277101	HSCHR3_2_CTG2_1	24216	164217	1057.26	0.404589	0.131023	3.08793	0.00201556	0.0215528
PAN2	-0.724001	0.611479	0.305297	chr12	56316935	56334000	7095	ENST00000440411.8	ENSG00000135473.16	ENSG00000135473	12	56316223	56334053	1135.74	0.219895	0.0777922	2.8267	0.00470306	0.0394078
RRN3P1	-0.729446	0.613555	0.305406	chr16	21797749	21820384	39276	ENST00000551901.6	ENSG00000248124.11	ENSG00000248124	16	21797750	21820384	109.552	0.656861	0.231591	2.8363	0.00456401	0.0386025
MED15	-0.814913	0.643708	0.305871	chr22	20507609	20587619	2139	ENST00000263205.11	ENSG00000099917.17	ENSG00000099917	22	20495913	20587632	3150.31	0.220514	0.0741053	2.97568	0.00292337	0.0280977
MEGF8	0.903319	-0.674676	0.306209	chr19	42325634	42378765	3112	ENST00000251268.11	ENSG00000105429.13	ENSG00000105429	19	42325609	42378769	2312	-0.397092	0.12732	-3.11884	0.00181564	0.0199941
SRGAP2	-0.738002	0.618262	0.306291	chr1	206203540	206464436	50513	ENST00000573034.8	ENSG00000266028.8	ENSG00000266028	1	206203346	206464436	1449.81	0.24935	0.0872445	2.85806	0.00426244	0.0366518
ARHGEF2	-0.891588	0.67098	0.306355	chr1	155946853	155978547	4591	ENST00000361247.9	ENSG00000116584.22	ENSG00000116584	1	155946851	156007070	1334.49	0.320452	0.103313	3.10175	0.00192377	0.0208712
ATXN2L	-0.86069	0.660402	0.306356	chr16	28822998	28837232	12383	ENST00000336783.9	ENSG00000168488.19	ENSG00000168488	16	28822999	28837237	6376.81	0.214216	0.0701691	3.05286	0.00226675	0.023392
PWWP2A	-1.12012	0.750054	0.306691	chr5	160091338	160119450	12778	ENST00000307063.9	ENSG00000170234.13	ENSG00000170234	5	160061801	160119450	924.285	0.384499	0.110893	3.46729	0.000525729	0.00776423
NOCT	-1.42046	0.853704	0.306943	chr4	139015780	139045939	9364	ENST00000280614.4	ENSG00000151014.6	ENSG00000151014	4	139015781	139045939	420.602	0.678381	0.171897	3.94644	7.9322e-05	0.00169053
LRCH4	-0.898078	0.674709	0.307041	chr7	100574010	100586129	1386	ENST00000310300.11	ENSG00000077454.17	ENSG00000077454	7	100574011	100586129	1141.86	0.251669	0.0806892	3.119	0.00181468	0.0199941
MOAP1	-1.24324	0.793907	0.307329	chr14	93182198	93184897	11730	ENST00000298894.5	ENSG00000165943.5	ENSG00000165943	14	93182199	93184923	797.559	0.34535	0.0941006	3.67001	0.000242539	0.00413851
MOAP1	-1.24324	0.793907	0.307329	chr14_KI270847v1_alt	296757	299490	58027	ENST00000616515.2	ENSG00000278268.2	ENSG00000278268	HSCHR14_7_CTG1	296758	299490	797.559	0.34535	0.0941006	3.67001	0.000242539	0.00413851
MIER2	-1.22852	0.789549	0.307602	chr19	305572	344796	3138	ENST00000264819.7	ENSG00000105556.12	ENSG00000105556	19	305573	344815	774.755	0.337059	0.0923483	3.64987	0.000262377	0.00442105
SLC35D1	-0.675502	0.601229	0.30853	chr1	66999349	67054148	4612	ENST00000235345.6	ENSG00000116704.8	ENSG00000116704	1	66999350	67054148	640.276	0.509047	0.183155	2.77932	0.00544732	0.0434818
KIF24	-0.774793	0.636086	0.30883	chr9	34252379	34329268	16301	ENST00000402558.7	ENSG00000186638.17	ENSG00000186638	9	34252380	34329268	576.67	0.480264	0.16333	2.94045	0.00327734	0.0301832
CLCN2	-1.21243	0.788224	0.309252	chr3	184346184	184361605	4345	ENST00000265593.9	ENSG00000114859.16	ENSG00000114859	3	184346185	184361650	601.793	0.350998	0.096329	3.64374	0.000268701	0.00449949
MMS22L	-1.32809	0.830266	0.310023	chr6	97142160	97283216	8835	ENST00000683635.1	ENSG00000146263.12	ENSG00000146263	6	97142161	97283217	886.937	0.568906	0.148226	3.83809	0.000123995	0.00240497
RAD9A	-1.41947	0.862926	0.310381	chr11	67391985	67398410	13356	ENST00000307980.7	ENSG00000172613.8	ENSG00000172613	11	67317871	67398410	1418.68	0.335828	0.0841871	3.98907	6.63333e-05	0.00144805
BRD8	-1.02529	0.728869	0.311531	chr5	138139769	138178630	4136	ENST00000254900.10	ENSG00000112983.18	ENSG00000112983	5	138139770	138178953	3122.54	0.201486	0.0597994	3.36936	0.000753429	0.0102357
MIOS	-0.757142	0.637165	0.312345	chr7	7566883	7608932	11415	ENST00000340080.9	ENSG00000164654.16	ENSG00000164654	7	7566875	7608932	1036.85	0.238803	0.0810756	2.94544	0.00322497	0.0299038
ZNF891	-1.06664	0.74671	0.312974	chr12	133104778	133130274	22801	ENST00000537226.3	ENSG00000214029.6	ENSG00000214029	12	133104779	133130274	98.3603	0.601692	0.174311	3.45184	0.000556785	0.00809214
DYRK1A	-1.33034	0.839891	0.313323	chr21	37366772	37526358	10122	ENST00000647188.2	ENSG00000157540.22	ENSG00000157540	21	37365573	37526358	1135.95	0.487375	0.125528	3.88259	0.000103352	0.00208326
ZSWIM6	-1.23662	0.807269	0.3134	chr5	61332257	61546172	6275	ENST00000252744.6	ENSG00000130449.6	ENSG00000130449	5	61332258	61546172	842.018	0.648078	0.173664	3.73178	0.000190129	0.00341726
FGFR3	-0.715818	0.625148	0.313554	chr4	1793292	1808867	1032	ENST00000440486.8	ENSG00000068078.20	ENSG00000068078	4	1793293	1808872	2674.17	0.262042	0.0906755	2.88989	0.00385378	0.0339472
USP25	-0.836433	0.667938	0.313798	chr21	15729981	15880064	9871	ENST00000400183.7	ENSG00000155313.16	ENSG00000155313	21	15729982	15880064	816.165	0.354233	0.114724	3.08769	0.00201717	0.0215528
ZNF562	-1.50417	0.903123	0.314144	chr19	9641806	9675100	13072	ENST00000453372.7	ENSG00000171466.10	ENSG00000171466	19	9641807	9675100	546.693	0.779234	0.186648	4.17489	2.98131e-05	0.000741335
SMG8	-1.19484	0.795313	0.31446	chr17	59210034	59215230	12101	ENST00000300917.10	ENSG00000167447.13	ENSG00000167447	17	59209400	59215239	1880.2	0.273714	0.0744494	3.67651	0.000236444	0.00406021
TGDS	-0.861404	0.678433	0.314604	chr13	94574053	94596152	1778	ENST00000261296.7	ENSG00000088451.11	ENSG00000088451	13	94574054	94596242	1061.03	0.241325	0.076948	3.13621	0.00171147	0.0192455
PHLDB3	-0.861679	0.679179	0.314905	chr19	43475102	43504746	14108	ENST00000292140.10	ENSG00000176531.11	ENSG00000176531	19	43474954	43504935	321.675	0.376074	0.119782	3.13966	0.00169145	0.0190602
IBTK	-0.845795	0.675075	0.3156	chr6	82169986	82247744	104	ENST00000306270.12	ENSG00000005700.15	ENSG00000005700	6	82169986	82247754	796.296	0.533921	0.171091	3.12068	0.00180431	0.0199566
IBTK	-0.845795	0.675075	0.3156	chr6_KQ090016v1_fix	29598	107356	61640	ENST00000635454.2	ENSG00000283068.2	ENSG00000283068	HG2072_PATCH	29598	107366	796.296	0.533921	0.171091	3.12068	0.00180431	0.0199566
NEURL4	-1.27321	0.827702	0.316311	chr17	7315627	7329335	23175	ENST00000399464.7	ENSG00000215041.10	ENSG00000215041	17	7315628	7329393	1982.29	0.412632	0.107843	3.82624	0.000130117	0.00249676
NEURL4	-1.27321	0.827702	0.316311	chr17_ML143374v1_fix	73992	87700	66458	ENST00000671847.1	ENSG00000288301.1	ENSG00000288301	HG2087_PATCH	73993	87758	1982.29	0.412632	0.107843	3.82624	0.000130117	0.00249676
PRPF39	-1.42593	0.882076	0.316449	chr14	45084115	45116282	15943	ENST00000355765.11	ENSG00000185246.18	ENSG00000185246	14	45084107	45116282	1166.29	0.506048	0.124104	4.0776	4.55037e-05	0.00106677
RNF168	-1.02336	0.740135	0.316638	chr3	196468782	196503768	11201	ENST00000318037.3	ENSG00000163961.4	ENSG00000163961	3	196468783	196503768	1396.27	0.303162	0.0886065	3.42144	0.000622901	0.00886446
IER5L	-1.46141	0.895279	0.316679	chr9	129175551	129178261	16724	ENST00000372491.4	ENSG00000188483.8	ENSG00000188483	9	129175552	129178261	207.985	0.818677	0.197814	4.13863	3.4939e-05	0.000848608
ZNF559	-0.814007	0.666382	0.316798	chr19	9324178	9345871	16687	ENST00000603380.6	ENSG00000188321.14	ENSG00000188321	19	9323772	9351162	366.164	0.367149	0.119185	3.0805	0.00206652	0.0218483
ZNF33B	-0.84544	0.677965	0.31701	chr10	42589108	42638570	17204	ENST00000359467.8	ENSG00000196693.15	ENSG00000196693	10	42574185	42638570	734.925	0.265622	0.0847537	3.13405	0.00172413	0.0193275
WAC	-0.644553	0.608414	0.317859	chr10	28533117	28623112	2044	ENST00000354911.9	ENSG00000095787.26	ENSG00000095787	10	28532493	28623112	3460.37	0.322238	0.114572	2.81253	0.00491535	0.0404018
IGHMBP2	-1.34338	0.857984	0.318342	chr11	68903890	68940601	6654	ENST00000255078.8	ENSG00000132740.10	ENSG00000132740	11	68903863	68940602	1135.45	0.347864	0.0877067	3.96622	7.30208e-05	0.00157491
SP9	-0.858991	0.686581	0.318781	chr2	174334953	174338500	23589	ENST00000394967.3	ENSG00000217236.2	ENSG00000217236	2	174334954	174338500	143.42	0.873136	0.275101	3.17387	0.00150419	0.0175485
SLC26A11	-0.842839	0.680974	0.31885	chr17	80220426	80253500	14998	ENST00000361193.8	ENSG00000181045.15	ENSG00000181045	17	80219699	80253500	650.681	0.265258	0.0842637	3.14795	0.00164418	0.0186578
RPRD1B	-0.587789	0.592232	0.320012	chr20	38033745	38092364	2525	ENST00000373433.9	ENSG00000101413.12	ENSG00000101413	20	38033725	38127780	1335.08	0.336332	0.122851	2.73772	0.00618661	0.0476886
ZNF589	-1.35866	0.868653	0.320272	chr3	48241103	48270990	11224	ENST00000354698.8	ENSG00000164048.14	ENSG00000164048	3	48241100	48299253	1792.06	0.249996	0.0622571	4.01555	5.93084e-05	0.00132969
RPL32P3	-0.946442	0.723724	0.321439	chr3	129396217	129397109	41457	ENST00000359025.4	ENSG00000251474.8	ENSG00000251474	3	129396218	129397109	199.331	0.54971	0.16431	3.34558	0.000821113	0.0108782
PPARGC1B	-1.187	0.810604	0.321619	chr5	149730309	149855022	9915	ENST00000309241.10	ENSG00000155846.17	ENSG00000155846	5	149730298	149855022	1222.41	0.590911	0.157694	3.7472	0.000178821	0.00325745
STK17B	-0.739446	0.649915	0.321715	chr2	196133582	196171578	1536	ENST00000263955.9	ENSG00000081320.11	ENSG00000081320	2	196133583	196176503	699.243	0.418201	0.139197	3.00438	0.00266126	0.0261137
ZNF638	-1.29913	0.851463	0.321828	chr2	71331781	71435061	1300	ENST00000264447.9	ENSG00000075292.19	ENSG00000075292	2	71276561	71435069	2627.1	0.37048	0.0941242	3.93608	8.28242e-05	0.0017479
AMMECR1L	-1.08268	0.773677	0.321857	chr2	127861629	127885956	8553	ENST00000272647.10	ENSG00000144233.12	ENSG00000144233	2	127861630	127885967	1511.64	0.389598	0.108933	3.5765	0.000348231	0.00549275
JUNB	-0.630821	0.611339	0.321969	chr19	12791485	12793315	13022	ENST00000302754.6	ENSG00000171223.6	ENSG00000171223	19	12791486	12793315	347.005	0.447101	0.158207	2.82605	0.00471259	0.0394355
DDX11	-1.28623	0.847232	0.321983	chr12	31073859	31104799	340	ENST00000542838.6	ENSG00000013573.17	ENSG00000013573	12	31073860	31104799	2886.79	0.368213	0.0940153	3.91652	8.98367e-05	0.00188116
ZKSCAN2	-1.4689	0.913028	0.322004	chr16	25236000	25257845	9893	ENST00000328086.12	ENSG00000155592.16	ENSG00000155592	16	25236001	25257845	756.55	0.434211	0.102877	4.22068	2.43569e-05	0.000620957
RABGEF1	-0.963452	0.732466	0.322597	chr7	66740732	66811464	9805	ENST00000284957.9	ENSG00000154710.18	ENSG00000154710	7	66682164	66811464	926.766	0.295709	0.0873332	3.38599	0.000709228	0.00985854
ZC3H8	-0.996573	0.744822	0.322777	chr2	112211528	112255042	8540	ENST00000409573.7	ENSG00000144161.14	ENSG00000144161	2	112211529	112255136	555.874	0.475592	0.138129	3.44311	0.000575071	0.00830196
ACACB	-1.17562	0.810647	0.323269	chr12	109116586	109268226	1349	ENST00000338432.12	ENSG00000076555.16	ENSG00000076555	12	109116587	109268226	352.005	0.623739	0.166446	3.7474	0.000178677	0.00325745
TBX18	-1.39305	0.890792	0.323844	chr6	84732495	84764598	4122	ENST00000369663.10	ENSG00000112837.17	ENSG00000112837	6	84687351	84764598	605.201	0.677031	0.164412	4.11789	3.82364e-05	0.000910246
PEMT	0.668536	-0.629048	0.3241	chr17	17505562	17591708	6703	ENST00000255389.10	ENSG00000133027.18	ENSG00000133027	17	17505563	17591708	1614.46	-0.349141	0.120066	-2.90791	0.00363848	0.0326679
RIT1	-0.568208	0.592724	0.324111	chr1	155897807	155911349	8450	ENST00000368323.8	ENSG00000143622.12	ENSG00000143622	1	155897808	155911404	628.377	0.217667	0.0794406	2.74	0.0061439	0.0474952
ORC5	-0.609583	0.608556	0.324561	chr7	104126340	104208013	11454	ENST00000297431.9	ENSG00000164815.11	ENSG00000164815	7	104126341	104208047	1700.52	0.199835	0.0710349	2.81319	0.00490529	0.0403498
CEP192	-1.25113	0.842442	0.325009	chr18	12991361	13125036	2563	ENST00000506447.5	ENSG00000101639.19	ENSG00000101639	18	12991362	13125052	659.297	0.76724	0.197012	3.89438	9.84508e-05	0.00199942
EEPD1	-1.44414	0.913776	0.325445	chr7	36153253	36301538	5283	ENST00000242108.9	ENSG00000122547.12	ENSG00000122547	7	36153254	36301538	368.043	0.46256	0.109504	4.22414	2.39858e-05	0.000612946
POLG	-1.24681	0.843148	0.325888	chr15	89316319	89334824	7995	ENST00000268124.11	ENSG00000140521.18	ENSG00000140521	15	89305198	89334861	3567.55	0.366796	0.0941071	3.89764	9.71333e-05	0.00198387
SMURF1	-1.03919	0.768843	0.326448	chr7	99027439	99144108	17856	ENST00000361368.7	ENSG00000198742.10	ENSG00000198742	7	99027440	99144108	930.981	0.417534	0.117478	3.55415	0.000379203	0.00590944
PHF21A	-1.14394	0.808598	0.327069	chr11	45929318	46121454	7065	ENST00000676320.1	ENSG00000135365.17	ENSG00000135365	11	45929319	46121454	466.984	0.457749	0.122461	3.73793	0.000185545	0.00335162
TRIM26	-1.14992	0.810876	0.327106	chr6	30184454	30213406	33155	ENST00000454678.7	ENSG00000234127.9	ENSG00000234127	6	30184455	30213427	2641.21	0.222514	0.0593616	3.74846	0.000177926	0.00325745
TRIM26	-1.14992	0.810876	0.327106	chr6_GL000250v2_alt	1442505	1471482	29078	ENST00000425523.5	ENSG00000228881.7	ENSG00000228881	HSCHR6_MHC_APD_CTG1	1442506	1471482	2641.21	0.222514	0.0593616	3.74846	0.000177926	0.00325745
TRIM26	-1.14992	0.810876	0.327106	chr6_GL000251v2_alt	1664234	1693198	30135	ENST00000436219.5	ENSG00000230230.7	ENSG00000230230	HSCHR6_MHC_COX_CTG1	1664235	1693198	2641.21	0.222514	0.0593616	3.74846	0.000177926	0.00325745
TRIM26	-1.14992	0.810876	0.327106	chr6_GL000252v2_alt	1440326	1469303	26891	ENST00000456093.5	ENSG00000226060.7	ENSG00000226060	HSCHR6_MHC_DBB_CTG1	1440327	1469303	2641.21	0.222514	0.0593616	3.74846	0.000177926	0.00325745
TRIM26	-1.14992	0.810876	0.327106	chr6_GL000253v2_alt	1495110	1524080	30736	ENST00000428486.5	ENSG00000231002.7	ENSG00000231002	HSCHR6_MHC_MANN_CTG1	1495111	1524080	2641.21	0.222514	0.0593616	3.74846	0.000177926	0.00325745
TRIM26	-1.14992	0.810876	0.327106	chr6_GL000254v2_alt	1528483	1557367	31225	ENST00000432326.5	ENSG00000231641.9	ENSG00000231641	HSCHR6_MHC_MCF_CTG1	1528484	1557367	2641.21	0.222514	0.0593616	3.74846	0.000177926	0.00325745
TRIM26	-1.14992	0.810876	0.327106	chr6_GL000255v2_alt	1439550	1468529	7459	ENST00000396558.5	ENSG00000137313.15	ENSG00000137313	HSCHR6_MHC_QBL_CTG1	1439551	1468529	2641.21	0.222514	0.0593616	3.74846	0.000177926	0.00325745
TRIM26	-1.14992	0.810876	0.327106	chr6_GL000256v2_alt	1483341	1512318	33088	ENST00000427535.5	ENSG00000234046.7	ENSG00000234046	HSCHR6_MHC_SSTO_CTG1	1483342	1512318	2641.21	0.222514	0.0593616	3.74846	0.000177926	0.00325745
CDAN1	-1.61238	0.981349	0.327572	chr15	42723543	42737128	7957	ENST00000356231.4	ENSG00000140326.13	ENSG00000140326	15	42723544	42737128	693.004	0.484279	0.106751	4.53651	5.71933e-06	0.000176726
ZNF267	-1.39229	0.901012	0.327661	chr16	31873806	31917357	16123	ENST00000300870.15	ENSG00000185947.15	ENSG00000185947	16	31873807	31917357	517.283	0.496179	0.119127	4.16513	3.11177e-05	0.00076489
POC5	-1.58754	0.973463	0.32798	chr5	75674123	75717437	9536	ENST00000428202.7	ENSG00000152359.15	ENSG00000152359	5	75674124	75717448	586.641	0.509775	0.113282	4.50005	6.79376e-06	0.000203511
EPN2	-0.844949	0.701594	0.328142	chr17	19237365	19336715	1180	ENST00000314728.10	ENSG00000072134.16	ENSG00000072134	17	19215615	19336715	1017.21	0.304994	0.0940389	3.24327	0.00118165	0.0144805
C10orf88	-1.04721	0.77624	0.32834	chr10	122930900	122954227	4996	ENST00000481909.2	ENSG00000119965.13	ENSG00000119965	10	122930901	122954311	363.559	0.513133	0.143	3.58835	0.000332783	0.00531664
TLE3	-0.983375	0.757057	0.33019	chr15	70047789	70097917	7958	ENST00000451782.7	ENSG00000140332.18	ENSG00000140332	15	70047790	70098176	3559.35	0.279871	0.0799706	3.49967	0.000465838	0.00699272
ZNF131	-0.69033	0.650597	0.331048	chr5	43120913	43176322	13268	ENST00000682664.1	ENSG00000172262.12	ENSG00000172262	5	43065176	43192021	942.906	0.394071	0.131028	3.00753	0.0026338	0.0259625
GGH	0.887868	-0.724547	0.331442	chr8	63015078	63038806	7506	ENST00000260118.7	ENSG00000137563.13	ENSG00000137563	8	63014881	63039407	2225.07	-0.279766	0.0835275	-3.34938	0.000809919	0.0107696
PIK3R3	-1.36187	0.90098	0.331751	chr1	46040139	46132629	4718	ENST00000262741.10	ENSG00000117461.15	ENSG00000117461	1	46040140	46133036	1782.87	0.397067	0.0953346	4.16498	3.11375e-05	0.00076489
PLK2	-1.49525	0.952596	0.332505	chr5	58453981	58460086	8732	ENST00000274289.8	ENSG00000145632.15	ENSG00000145632	5	58453982	58460139	253.8	0.526597	0.119583	4.40359	1.06475e-05	0.000299797
STAG3L5P-PVRIG2P-PILRB	-1.54513	0.971842	0.332747	chr7	100336113	100367831	53971	ENST00000310771.8	ENSG00000272752.6	ENSG00000272752	7	100336104	100367831	438.869	0.661752	0.1473	4.49256	7.03727e-06	0.000208921
ZNF554	-1.01048	0.773661	0.333032	chr19	2819867	2836735	13210	ENST00000317243.10	ENSG00000172006.12	ENSG00000172006	19	2819868	2836735	205.047	0.485516	0.135755	3.57642	0.000348331	0.00549275
ZNF530	-0.584719	0.615478	0.333191	chr19	57599884	57610098	15549	ENST00000597700.6	ENSG00000183647.11	ENSG00000183647	19	57599885	57612722	164.831	0.695966	0.244612	2.84518	0.00443859	0.0377243
RBM20	-0.911858	0.739748	0.334295	chr10	110644335	110839468	19691	ENST00000369519.4	ENSG00000203867.8	ENSG00000203867	10	110644336	110839468	616.33	0.534306	0.156246	3.41965	0.000627011	0.00889696
PRPF3	-0.732542	0.673238	0.334538	chr1	150321532	150353233	4703	ENST00000324862.7	ENSG00000117360.13	ENSG00000117360	1	150321479	150353233	3182.72	0.274019	0.088047	3.11219	0.00185703	0.0203519
MAP3K9	-1.06275	0.797833	0.335012	chr14	70722525	70809513	134	ENST00000554752.7	ENSG00000006432.16	ENSG00000006432	14	70722526	70809534	494.623	0.550297	0.149206	3.68816	0.00022588	0.00390993
NR2C1	-0.611018	0.628922	0.335136	chr12	95020228	95073618	5104	ENST00000333003.10	ENSG00000120798.17	ENSG00000120798	12	95020229	95073628	1015.41	0.214563	0.0738008	2.90733	0.00364524	0.0326694
CROCCP2	-1.48031	0.958657	0.336582	chr1	16618968	16657232	23433	ENST00000412962.4	ENSG00000215908.12	ENSG00000215908	1	16618969	16657232	989.65	0.525631	0.11861	4.43161	9.35341e-06	0.000268979
CROCCP2	-1.48031	0.958657	0.336582	chr1	16618272	16644686	68899	ENST00000639456.1	ENSG00000291072.1	ENSG00000291072	1	16618253	16644686	989.65	0.525631	0.11861	4.43161	9.35341e-06	0.000268979
ATXN2	-0.996485	0.779917	0.338	chr12	111452213	111599315	20042	ENST00000673436.1	ENSG00000204842.18	ENSG00000204842	12	111443485	111599676	1459.07	0.439599	0.12193	3.60534	0.000311741	0.00505536
SETDB1	-1.1055	0.822185	0.338446	chr1	150926362	150964737	8392	ENST00000692827.1	ENSG00000143379.13	ENSG00000143379	1	150926263	150964744	2267.49	0.286336	0.0753371	3.80074	0.000144267	0.00271989
HCFC2	-0.529263	0.604726	0.338736	chr12	104064530	104106524	3947	ENST00000229330.9	ENSG00000111727.12	ENSG00000111727	12	104064531	104106524	282.34	0.411206	0.147097	2.79548	0.00518225	0.0419859
POLN	-1.06531	0.809585	0.339538	chr4	2071917	2242121	6380	ENST00000511885.6	ENSG00000130997.16	ENSG00000130997	4	2071918	2242121	172.73	0.543376	0.145191	3.74249	0.000182206	0.00330793
CROCC	-0.773961	0.699228	0.33964	chr1	16921930	16972964	789	ENST00000375541.10	ENSG00000058453.17	ENSG00000058453	1	16740273	16972964	535.211	0.338199	0.10463	3.23234	0.00122781	0.0149276
GABBR1	-0.894062	0.74622	0.340278	chr6	29602237	29633183	19992	ENST00000377034.9	ENSG00000204681.11	ENSG00000204681	6	29555629	29633976	745.278	0.401386	0.116358	3.44957	0.000561483	0.00814944
GABBR1	-0.894062	0.74622	0.340278	chr6_GL000250v2_alt	821306	893756	31933	ENST00000449163.5	ENSG00000232569.8	ENSG00000232569	HSCHR6_MHC_APD_CTG1	821307	898877	745.278	0.401386	0.116358	3.44957	0.000561483	0.00814944
GABBR1	-0.894062	0.74622	0.340278	chr6_GL000251v2_alt	1042092	1114519	31984	ENST00000438094.5	ENSG00000232632.8	ENSG00000232632	HSCHR6_MHC_COX_CTG1	1042093	1119641	745.278	0.401386	0.116358	3.44957	0.000561483	0.00814944
GABBR1	-0.894062	0.74622	0.340278	chr6_GL000252v2_alt	821154	893588	35479	ENST00000417759.5	ENSG00000237112.8	ENSG00000237112	HSCHR6_MHC_DBB_CTG1	821155	898710	745.278	0.401386	0.116358	3.44957	0.000561483	0.00814944
GABBR1	-0.894062	0.74622	0.340278	chr6_GL000253v2_alt	820770	893182	35434	ENST00000448754.5	ENSG00000237051.8	ENSG00000237051	HSCHR6_MHC_MANN_CTG1	820771	898309	745.278	0.401386	0.116358	3.44957	0.000561483	0.00814944
GABBR1	-0.894062	0.74622	0.340278	chr6_GL000254v2_alt	821015	893432	20502	ENST00000383543.7	ENSG00000206466.10	ENSG00000206466	HSCHR6_MHC_MCF_CTG1	821016	898553	745.278	0.401386	0.116358	3.44957	0.000561483	0.00814944
GABBR1	-0.894062	0.74622	0.340278	chr6_GL000255v2_alt	821110	893551	20535	ENST00000383639.6	ENSG00000206511.10	ENSG00000206511	HSCHR6_MHC_QBL_CTG1	821111	898673	745.278	0.401386	0.116358	3.44957	0.000561483	0.00814944
ZNF707	-1.41456	0.944224	0.340295	chr8	143684478	143695385	15011	ENST00000358656.9	ENSG00000181135.16	ENSG00000181135	8	143684452	143713898	527.244	0.585497	0.134138	4.36489	1.27189e-05	0.000351693
ZNF707	-1.41456	0.944224	0.340295	chr8_KI270816v1_alt	161527	172432	55050	ENST00000611844.4	ENSG00000274352.4	ENSG00000274352	HSCHR8_3_CTG7	161499	190945	527.244	0.585497	0.134138	4.36489	1.27189e-05	0.000351693
MB21D2	-1.57927	1.00775	0.340593	chr3	192796814	192917856	14903	ENST00000392452.3	ENSG00000180611.7	ENSG00000180611	3	192796815	192917856	428.006	0.432103	0.0927546	4.65856	3.18433e-06	0.000109221
ATAD5	-0.709417	0.677429	0.341	chr17	30831965	30895869	14044	ENST00000321990.5	ENSG00000176208.9	ENSG00000176208	17	30831966	30895869	703.005	0.558681	0.178403	3.13157	0.00173877	0.0194713
CHD9	-0.85684	0.733883	0.341124	chr16	53054990	53327497	14256	ENST00000447540.6	ENSG00000177200.18	ENSG00000177200	16	53054991	53329150	509.79	0.753763	0.222183	3.39254	0.000692484	0.00967324
OGDHL	-0.62061	0.64458	0.341529	chr10	49734640	49762323	17432	ENST00000374103.9	ENSG00000197444.10	ENSG00000197444	10	49734641	49762379	813.018	0.254615	0.0854494	2.97972	0.00288514	0.0278246
MBTD1	-1.12645	0.838442	0.341844	chr17	51177424	51260049	288	ENST00000586178.6	ENSG00000011258.16	ENSG00000011258	17	51177425	51260163	694.852	0.638518	0.164741	3.87589	0.000106237	0.00213345
FAM220A	-0.657938	0.660158	0.342218	chr7	6329410	6348967	14491	ENST00000313324.9	ENSG00000178397.13	ENSG00000178397	7	6329411	6348981	797.375	0.253935	0.0832103	3.05173	0.00227526	0.023435
KIF13B	-0.679276	0.668404	0.342261	chr8	29067277	29263070	17576	ENST00000524189.6	ENSG00000197892.13	ENSG00000197892	8	29067278	29263124	242.671	0.487687	0.157835	3.08985	0.0020026	0.0214908
SIPA1L2	-0.782579	0.708619	0.342598	chr1	232397964	232630133	4660	ENST00000674635.1	ENSG00000116991.12	ENSG00000116991	1	232397965	232630571	558.593	0.403995	0.123329	3.27575	0.00105382	0.0132917
TRIT1	-0.468103	0.588494	0.342769	chr1	39838109	39883504	599	ENST00000316891.10	ENSG00000043514.17	ENSG00000043514	1	39838110	39883511	1239.59	0.285165	0.104823	2.72045	0.00651937	0.0495163
OSBPL7	-0.632287	0.653094	0.343663	chr17	47807371	47821794	118	ENST00000007414.8	ENSG00000006025.13	ENSG00000006025	17	47807372	47821803	225.419	0.362809	0.120172	3.01907	0.00253549	0.0253878
ZNF445	-0.94494	0.773487	0.343797	chr3	44431704	44477670	15935	ENST00000396077.8	ENSG00000185219.18	ENSG00000185219	3	44431705	44477670	1093.37	0.607178	0.169811	3.57562	0.000349399	0.00550062
SDHAP2	-1.45413	0.970014	0.344105	chr3	195658095	195685904	23406	ENST00000455183.1	ENSG00000215837.7	ENSG00000215837	3	195658096	195685904	110.966	0.911661	0.203309	4.48411	7.32198e-06	0.000215151
SDHAP2	-1.45413	0.970014	0.344105	chr3_KI270779v1_alt	28592	56401	60271	ENST00000625332.1	ENSG00000281334.1	ENSG00000281334	HSCHR3_1_CTG3	28593	56401	110.966	0.911661	0.203309	4.48411	7.32198e-06	0.000215151
SDHAP2	-1.45413	0.970014	0.344105	chr3_KI270895v1_alt	106495	134304	60043	ENST00000625707.1	ENSG00000280909.1	ENSG00000280909	HSCHR3_3_CTG3	106496	134304	110.966	0.911661	0.203309	4.48411	7.32198e-06	0.000215151
SDHAP2	-1.45413	0.970014	0.344105	chr3_KI270924v1_alt	110139	137948	60223	ENST00000629942.1	ENSG00000281237.1	ENSG00000281237	HSCHR3_4_CTG3	110140	137948	110.966	0.911661	0.203309	4.48411	7.32198e-06	0.000215151
SDHAP2	-1.45413	0.970014	0.344105	chr3_KI270934v1_alt	107057	134866	59825	ENST00000630694.1	ENSG00000280521.1	ENSG00000280521	HSCHR3_5_CTG3	107058	134866	110.966	0.911661	0.203309	4.48411	7.32198e-06	0.000215151
SDHAP2	-1.45413	0.970014	0.344105	chr3_KI270935v1_alt	28592	56401	60044	ENST00000626429.1	ENSG00000280912.1	ENSG00000280912	HSCHR3_6_CTG3	28593	56401	110.966	0.911661	0.203309	4.48411	7.32198e-06	0.000215151
SDHAP2	-1.45413	0.970014	0.344105	chr3_KI270936v1_alt	107769	135578	60323	ENST00000628964.1	ENSG00000281418.1	ENSG00000281418	HSCHR3_7_CTG3	107770	135578	110.966	0.911661	0.203309	4.48411	7.32198e-06	0.000215151
SDHAP2	-1.45413	0.970014	0.344105	chr3_KI270937v1_alt	109206	137015	60457	ENST00000629440.1	ENSG00000281687.1	ENSG00000281687	HSCHR3_8_CTG3	109207	137015	110.966	0.911661	0.203309	4.48411	7.32198e-06	0.000215151
ZNF34	-1.43868	0.965062	0.344458	chr8	144772223	144787317	17093	ENST00000429371.7	ENSG00000196378.13	ENSG00000196378	8	144772224	144787345	194.834	0.654956	0.146811	4.46122	8.14962e-06	0.000236888
TIGD6	-1.16095	0.85835	0.344544	chr5	149993117	150000654	11320	ENST00000296736.4	ENSG00000164296.7	ENSG00000164296	5	149993118	150000654	373.48	0.481319	0.121303	3.96792	7.25041e-05	0.00157005
AARS2	-0.596679	0.641383	0.34472	chr6	44298730	44313347	5562	ENST00000244571.5	ENSG00000124608.5	ENSG00000124608	6	44298731	44313347	2362.54	0.305362	0.102991	2.96494	0.00302746	0.0288156
GGA3	-0.46695	0.591426	0.344735	chr17	75236598	75261606	5655	ENST00000537686.6	ENSG00000125447.18	ENSG00000125447	17	75236599	75262363	1869.8	0.220267	0.0805657	2.734	0.006257	0.0481624
SH3RF3	-0.582189	0.63586	0.344752	chr2	109129204	109504634	13435	ENST00000309415.8	ENSG00000172985.11	ENSG00000172985	2	109129205	109504634	526.933	0.303034	0.103094	2.9394	0.00328844	0.0302582
POFUT2	-0.862941	0.744938	0.345168	chr21	45263934	45287895	16350	ENST00000349485.10	ENSG00000186866.17	ENSG00000186866	21	45263928	45287898	917.423	0.284461	0.0826046	3.44364	0.000573936	0.00829668
MAPK8IP3	-0.581872	0.637292	0.345596	chr16	1706194	1770351	7765	ENST00000610761.2	ENSG00000138834.15	ENSG00000138834	16	1706166	1770351	1623.2	0.343432	0.116575	2.94603	0.00321884	0.0298726
DMTF1	-1.325	0.924446	0.345636	chr7	87152452	87196325	7029	ENST00000331242.12	ENSG00000135164.19	ENSG00000135164	7	87152409	87196337	1893.85	0.363358	0.0850265	4.27346	1.92461e-05	0.000503763
TBRG1	-0.501339	0.606771	0.345929	chr11	124622863	124635926	9740	ENST00000441174.8	ENSG00000154144.13	ENSG00000154144	11	124622836	124635926	983.795	0.235702	0.0840312	2.80493	0.0050327	0.0411601
TAF5	-0.591937	0.64187	0.345967	chr10	103367975	103389065	9153	ENST00000369839.4	ENSG00000148835.12	ENSG00000148835	10	103367966	103389065	916.257	0.228901	0.0771439	2.96719	0.00300536	0.0287305
CHAF1A	-0.641216	0.662958	0.347032	chr19	4402639	4443397	12167	ENST00000301280.10	ENSG00000167670.16	ENSG00000167670	19	4402640	4445018	4612.74	0.203456	0.0663875	3.06467	0.00217908	0.0226978
GTF2E1	-1.08709	0.835939	0.347048	chr3	120742743	120783069	9686	ENST00000283875.6	ENSG00000153767.10	ENSG00000153767	3	120742637	120783069	542.288	0.371593	0.09616	3.86432	0.0001114	0.0022165
MCPH1	-1.61439	1.04083	0.347167	chr8	6406626	6648508	8968	ENST00000344683.10	ENSG00000147316.15	ENSG00000147316	8	6406592	6648508	544.605	0.618244	0.128494	4.81147	1.49827e-06	5.68922e-05
RDH13	-1.06186	0.826788	0.347314	chr19	55044315	55063148	10500	ENST00000415061.8	ENSG00000160439.16	ENSG00000160439	19	55039108	55071291	913.275	0.28637	0.0749265	3.82201	0.000132367	0.00253093
RDH13	-1.06186	0.826788	0.347314	chr19_GL949746v1_alt	947721	966615	57939	ENST00000620423.1	ENSG00000278149.1	ENSG00000278149	HSCHR19LRC_COX1_CTG3_1	947722	966615	913.275	0.28637	0.0749265	3.82201	0.000132367	0.00253093
RDH13	-1.06186	0.826788	0.347314	chr19_GL949747v2_alt	689525	708419	56944	ENST00000616348.1	ENSG00000276826.1	ENSG00000276826	HSCHR19LRC_COX2_CTG3_1	689526	708419	913.275	0.28637	0.0749265	3.82201	0.000132367	0.00253093
RDH13	-1.06186	0.826788	0.347314	chr19_GL949748v2_alt	1024309	1043203	56578	ENST00000613257.1	ENSG00000276341.1	ENSG00000276341	HSCHR19LRC_LRC_I_CTG3_1	1024310	1043203	913.275	0.28637	0.0749265	3.82201	0.000132367	0.00253093
RDH13	-1.06186	0.826788	0.347314	chr19_GL949749v2_alt	1051846	1070740	54742	ENST00000621849.1	ENSG00000273944.1	ENSG00000273944	HSCHR19LRC_LRC_J_CTG3_1	1051847	1070740	913.275	0.28637	0.0749265	3.82201	0.000132367	0.00253093
RDH13	-1.06186	0.826788	0.347314	chr19_GL949750v2_alt	1026395	1045289	55909	ENST00000615688.1	ENSG00000275474.1	ENSG00000275474	HSCHR19LRC_LRC_S_CTG3_1	1026396	1045289	913.275	0.28637	0.0749265	3.82201	0.000132367	0.00253093
RDH13	-1.06186	0.826788	0.347314	chr19_GL949751v2_alt	962688	981582	55166	ENST00000613935.1	ENSG00000274504.1	ENSG00000274504	HSCHR19LRC_LRC_T_CTG3_1	962689	981582	913.275	0.28637	0.0749265	3.82201	0.000132367	0.00253093
RDH13	-1.06186	0.826788	0.347314	chr19_GL949752v1_alt	947105	965999	55101	ENST00000622200.1	ENSG00000274418.1	ENSG00000274418	HSCHR19LRC_PGF1_CTG3_1	947106	965999	913.275	0.28637	0.0749265	3.82201	0.000132367	0.00253093
RDH13	-1.06186	0.826788	0.347314	chr19_GL949753v2_alt	756484	775378	58039	ENST00000622572.1	ENSG00000278284.1	ENSG00000278284	HSCHR19LRC_PGF2_CTG3_1	756485	775378	913.275	0.28637	0.0749265	3.82201	0.000132367	0.00253093
RDH13	-1.06186	0.826788	0.347314	chr19_KI270938v1_alt	1026824	1052011	56837	ENST00000621614.4	ENSG00000276684.4	ENSG00000276684	HSCHR19_4_CTG3_1	1021590	1053773	913.275	0.28637	0.0749265	3.82201	0.000132367	0.00253093
FAN1	-0.646193	0.665582	0.347393	chr15	30903914	30943108	17829	ENST00000362065.9	ENSG00000198690.10	ENSG00000198690	15	30890559	30943108	847.305	0.385281	0.125221	3.0768	0.00209235	0.0220566
FAN1	-0.646193	0.665582	0.347393	chr15_KI270905v1_alt	3189604	3228834	56919	ENST00000621063.1	ENSG00000276787.1	ENSG00000276787	HSCHR15_4_CTG8	3189605	3228834	847.305	0.385281	0.125221	3.0768	0.00209235	0.0220566
ZNF687	-0.861302	0.750657	0.348114	chr1	151282298	151292176	8388	ENST00000336715.11	ENSG00000143373.18	ENSG00000143373	1	151281618	151292176	1693.87	0.525645	0.151479	3.47008	0.0005203	0.00772698
C2CD2L	-1.16988	0.872118	0.348673	chr11	119107343	119118544	13303	ENST00000648610.2	ENSG00000172375.14	ENSG00000172375	11	119102198	119118544	798.897	0.361203	0.0895938	4.03156	5.54073e-05	0.00125385
ZNF354A	-1.04046	0.82365	0.349509	chr5	178711511	178730659	12534	ENST00000335815.7	ENSG00000169131.13	ENSG00000169131	5	178711512	178730659	593.95	0.347492	0.091265	3.80751	0.000140374	0.00266045
GAS8	-0.930303	0.783847	0.350954	chr16	90022679	90044960	8066	ENST00000268699.9	ENSG00000141013.17	ENSG00000141013	16	90019629	90044975	891.981	0.276376	0.0762729	3.62351	0.000290631	0.00477042
TRIM68	-0.928582	0.783684	0.351183	chr11	4598671	4608231	12082	ENST00000300747.10	ENSG00000167333.13	ENSG00000167333	11	4598672	4608231	532.179	0.398601	0.110027	3.62275	0.000291482	0.00477712
MAST3	-0.555968	0.639549	0.352351	chr19	18097777	18151687	2093	ENST00000687212.1	ENSG00000099308.13	ENSG00000099308	19	18097778	18151692	452.67	0.265879	0.0899317	2.95646	0.00311196	0.029353
PKD1P6	-1.54998	1.03105	0.352367	chr16	15125241	15154564	40623	ENST00000343738.10	ENSG00000250251.7	ENSG00000250251	16	15125242	15154564	507.012	0.610162	0.128017	4.76627	1.87668e-06	6.86036e-05
PKD1P6	-1.54998	1.03105	0.352367	chr16_KI270853v1_alt	526528	540016	60752	ENST00000633687.1	ENSG00000282086.2	ENSG00000282086	HSCHR16_1_CTG1	526529	540016	507.012	0.610162	0.128017	4.76627	1.87668e-06	6.86036e-05
KIF7	-0.733169	0.709768	0.352567	chr15	89627976	89655467	11948	ENST00000394412.8	ENSG00000166813.17	ENSG00000166813	15	89608789	89663086	1570.85	0.282943	0.0862353	3.28106	0.00103417	0.0131826
FANCA	-0.508086	0.622424	0.353334	chr16	89737548	89816647	16535	ENST00000389301.8	ENSG00000187741.16	ENSG00000187741	16	89726683	89816977	3269.28	0.217304	0.0755236	2.87729	0.00401101	0.034911
NDUFAF7	-0.621638	0.667799	0.353616	chr2	37231657	37249160	42	ENST00000002125.9	ENSG00000003509.16	ENSG00000003509	2	37231631	37253403	682.133	0.261247	0.0846265	3.08705	0.00202151	0.0215528
ZFYVE26	-0.894827	0.777466	0.354388	chr14	67746521	67816590	1178	ENST00000347230.9	ENSG00000072121.17	ENSG00000072121	14	67727374	67816590	869.228	0.46435	0.129201	3.59401	0.000325627	0.00523333
RECQL5	-0.957827	0.805211	0.355621	chr17	75626853	75667154	3539	ENST00000317905.10	ENSG00000108469.15	ENSG00000108469	17	75626845	75667189	1257.76	0.288375	0.0774729	3.72227	0.000197439	0.00351931
LRP8	-0.732501	0.716609	0.356097	chr1	53242363	53328070	10083	ENST00000306052.12	ENSG00000157193.18	ENSG00000157193	1	53242364	53328469	635.266	0.367723	0.111004	3.31269	0.000924041	0.0120348
ZRANB1	-0.670016	0.691887	0.356173	chr10	124942122	124988189	396	ENST00000359653.4	ENSG00000019995.6	ENSG00000019995	10	124942123	124988189	1189.68	0.300769	0.0940374	3.1984	0.00138192	0.0165034
RNASEL	-0.702932	0.705458	0.356409	chr1	182573633	182589256	7159	ENST00000367559.7	ENSG00000135828.11	ENSG00000135828	1	182573634	182589256	180.298	0.454286	0.139303	3.26114	0.00110966	0.013792
PRKAB1	-0.662922	0.69028	0.356802	chr12	119668132	119681619	3945	ENST00000229328.10	ENSG00000111725.11	ENSG00000111725	12	119667864	119681624	1574.28	0.249509	0.0781921	3.19097	0.00141794	0.0168368
CCDC157	-1.09614	0.864066	0.357224	chr22	30357006	30378673	16571	ENST00000338306.8	ENSG00000187860.11	ENSG00000187860	22	30356635	30378673	150.024	0.602039	0.150723	3.99434	6.48752e-05	0.00142488
ITFG2	-0.654216	0.687741	0.357287	chr12	2812667	2825076	3859	ENST00000228799.7	ENSG00000111203.13	ENSG00000111203	12	2812622	2859791	1133.8	0.304735	0.0958516	3.17924	0.00147663	0.0173316
HSF2	-1.00939	0.830682	0.357764	chr6	122399651	122433119	444	ENST00000368455.9	ENSG00000025156.13	ENSG00000025156	6	122399551	122433119	1550.47	0.371132	0.0966487	3.84001	0.000123028	0.00239051
PPP2R1A	0.803264	-0.749199	0.358214	chr19	52190051	52229518	3140	ENST00000322088.11	ENSG00000105568.19	ENSG00000105568	19	52170936	52229518	20589.9	-0.266922	0.0770708	-3.46334	0.000533514	0.00785986
CRY2	-1.25476	0.930283	0.358337	chr11	45847474	45883244	5190	ENST00000616080.2	ENSG00000121671.12	ENSG00000121671	11	45847118	45883248	745.842	0.416981	0.0969622	4.30044	1.70456e-05	0.000449966
ZNF845	-1.40059	0.989458	0.358615	chr19	53333748	53356906	22693	ENST00000458035.3	ENSG00000213799.13	ENSG00000213799	19	53333749	53356906	255.676	0.644041	0.140805	4.57399	4.78517e-06	0.000152222
KDM6B	-0.544564	0.646887	0.358915	chr17	7834216	7854796	6607	ENST00000448097.7	ENSG00000132510.11	ENSG00000132510	17	7834217	7854796	508.206	0.636362	0.212803	2.99038	0.0027863	0.0270455
N4BP2L2	-1.4944	1.02879	0.359222	chr13	32510291	32538795	39019	ENST00000267068.6	ENSG00000244754.9	ENSG00000244754	13	32432417	32538885	957.112	0.369545	0.0777035	4.75583	1.97628e-06	7.15174e-05
ARHGAP24	-0.595942	0.668397	0.359398	chr4	85475149	86002666	7708	ENST00000395184.6	ENSG00000138639.18	ENSG00000138639	4	85475150	86002668	94.0527	0.595803	0.192828	3.08982	0.00200281	0.0214908
TBC1D30	-0.496119	0.630236	0.360506	chr12	64824646	64881033	3906	ENST00000539867.6	ENSG00000111490.15	ENSG00000111490	12	64759484	64881033	377.927	0.298698	0.102525	2.91341	0.00357509	0.032258
TMEM161B	-0.635889	0.691615	0.363164	chr5	88195046	88268845	11288	ENST00000296595.11	ENSG00000164180.14	ENSG00000164180	5	88189633	88269476	542.482	0.358117	0.112011	3.19714	0.00138796	0.0165572
ZNHIT6	-0.500806	0.638037	0.363879	chr1	85649416	85708433	4686	ENST00000370574.4	ENSG00000117174.11	ENSG00000117174	1	85649417	85708433	2158.51	0.22151	0.0751015	2.94947	0.00318318	0.0296693
YEATS2	-1.3157	0.971641	0.364698	chr3	183697796	183812624	11166	ENST00000305135.10	ENSG00000163872.16	ENSG00000163872	3	183697797	183812624	1585.41	0.594579	0.132375	4.49163	7.06808e-06	0.000208921
ZNF181	-1.11909	0.891765	0.364808	chr19	34734242	34745378	17556	ENST00000492450.3	ENSG00000197841.15	ENSG00000197841	19	34734155	34745378	213.899	0.531178	0.128852	4.12238	3.74971e-05	0.000900599
ATAD2B	-0.895182	0.800611	0.364873	chr2	23748663	23927123	4968	ENST00000238789.10	ENSG00000119778.15	ENSG00000119778	2	23748664	23927123	477.415	0.638694	0.172573	3.70101	0.000214747	0.00377171
NRF1	-1.3747	0.997414	0.365331	chr7	129611719	129757076	3314	ENST00000393232.6	ENSG00000106459.15	ENSG00000106459	7	129611720	129757082	1027.79	0.36278	0.0786811	4.61077	4.01177e-06	0.0001311
TSC22D1	-1.03059	0.858063	0.365824	chr13	44432142	44576330	2710	ENST00000458659.3	ENSG00000102804.16	ENSG00000102804	13	44432143	44577147	1644.46	0.345264	0.087043	3.96659	7.29089e-05	0.00157491
ZNF77	-1.21213	0.932538	0.365921	chr19	2933217	2944971	13945	ENST00000314531.5	ENSG00000175691.9	ENSG00000175691	19	2933218	2944971	428.093	0.478777	0.111063	4.31087	1.62617e-05	0.000434075
DSTYK	-0.448419	0.621345	0.366601	chr1	205142504	205211702	6709	ENST00000367162.8	ENSG00000133059.18	ENSG00000133059	1	205142505	205211702	740.901	0.288522	0.10045	2.87231	0.00407486	0.035381
TEX10	-0.905892	0.810829	0.367524	chr9	100302083	100352942	7372	ENST00000374902.9	ENSG00000136891.14	ENSG00000136891	9	100302077	100352942	2227.04	0.255353	0.068126	3.74824	0.000178079	0.00325745
FBXO42	-1.18602	0.928297	0.368476	chr1	16246839	16352480	540	ENST00000375592.8	ENSG00000037637.11	ENSG00000037637	1	16246840	16352480	1367.91	0.313533	0.0730631	4.29126	1.7766e-05	0.00046729
FBXO42	-1.18602	0.928297	0.368476	chr1_MU273333v1_fix	50976	156623	69173	ENST00000707355.1	ENSG00000291375.1	ENSG00000291375	HG1343_HG173_HG459_PATCH	50977	156623	1367.91	0.313533	0.0730631	4.29126	1.7766e-05	0.00046729
AP3M2	-1.17323	0.92338	0.368616	chr8	42153062	42171183	1124	ENST00000396926.8	ENSG00000070718.13	ENSG00000070718	8	42152946	42171673	1357.3	0.332458	0.0778859	4.26853	1.96765e-05	0.000513782
MICA	0.46769	-0.633935	0.369335	chr6	31403594	31415315	19918	ENST00000449934.7	ENSG00000204520.14	ENSG00000204520	6	31399784	31415315	578.158	-0.45329	0.15468	-2.93051	0.0033841	0.0309535
MICA	0.46769	-0.633935	0.369335	chr6_GL000251v2_alt	2880150	2895686	32319	ENST00000417899.5	ENSG00000233051.9	ENSG00000233051	HSCHR6_MHC_COX_CTG1	2880151	2896610	578.158	-0.45329	0.15468	-2.93051	0.0033841	0.0309535
MICA	0.46769	-0.633935	0.369335	chr6_GL000253v2_alt	2708376	2723902	34025	ENST00000420259.5	ENSG00000235233.9	ENSG00000235233	HSCHR6_MHC_MANN_CTG1	2708377	2724826	578.158	-0.45329	0.15468	-2.93051	0.0033841	0.0309535
MICA	0.46769	-0.633935	0.369335	chr6_GL000255v2_alt	2655410	2670984	15440	ENST00000400322.5	ENSG00000183214.12	ENSG00000183214	HSCHR6_MHC_QBL_CTG1	2655411	2671966	578.158	-0.45329	0.15468	-2.93051	0.0033841	0.0309535
MICA	0.46769	-0.633935	0.369335	chr6_GL000256v2_alt	2702060	2717592	30907	ENST00000438928.5	ENSG00000231225.9	ENSG00000231225	HSCHR6_MHC_SSTO_CTG1	2702061	2718516	578.158	-0.45329	0.15468	-2.93051	0.0033841	0.0309535
STRADB	0.507252	-0.651924	0.370277	chr2	201451739	201480846	1558	ENST00000194530.8	ENSG00000082146.13	ENSG00000082146	2	201387858	201480846	1810.51	-0.227893	0.0756198	-3.01366	0.00258114	0.0256279
SPG11	-0.524102	0.659653	0.370701	chr15	44562695	44663662	2882	ENST00000261866.12	ENSG00000104133.16	ENSG00000104133	15	44554818	44663688	812.2	0.435913	0.142951	3.04939	0.00229303	0.0235729
CDK5RAP2	-0.449423	0.629706	0.371288	chr9	120388874	120580167	7358	ENST00000349780.9	ENSG00000136861.19	ENSG00000136861	9	120388875	120580170	2059.07	0.278879	0.0958033	2.91096	0.00360325	0.0324353
SPIRE2	-0.36882	0.596888	0.37168	chr16	89828474	89871319	20103	ENST00000378247.8	ENSG00000204991.11	ENSG00000204991	16	89818179	89871319	551.279	0.252207	0.0914041	2.75925	0.00579347	0.0455038
TICAM1	-1.04022	0.876535	0.371991	chr19	4815931	4831712	5952	ENST00000248244.6	ENSG00000127666.11	ENSG00000127666	19	4815932	4831712	136.531	0.647331	0.159757	4.05198	5.07861e-05	0.00116606
CA2	0.370245	-0.59801	0.37201	chr8	85464006	85481493	2897	ENST00000285379.10	ENSG00000104267.10	ENSG00000104267	8	85463968	85481493	2760.12	-0.1795	0.0649321	-2.76443	0.00570215	0.0450821
ZNF410	-0.852133	0.800413	0.37296	chr14	73886858	73932521	4961	ENST00000555044.6	ENSG00000119725.21	ENSG00000119725	14	73886617	73932521	1815.21	0.249513	0.0674345	3.70009	0.000215525	0.00377922
CACHD1	-0.845936	0.797866	0.372978	chr1	64470128	64693053	10296	ENST00000651257.2	ENSG00000158966.16	ENSG00000158966	1	64470129	64693058	944.98	0.570462	0.154667	3.68832	0.000225742	0.00390993
CCDC138	-0.434514	0.626703	0.373184	chr2	108786770	108876578	10901	ENST00000295124.9	ENSG00000163006.12	ENSG00000163006	2	108786757	108885477	1042.93	0.286529	0.0989028	2.89708	0.00376659	0.033409
HOXA3	-1.35712	1.0116	0.373211	chr7	27107009	27152583	3241	ENST00000612286.5	ENSG00000105997.23	ENSG00000105997	7	27106184	27152583	530.187	0.56332	0.120462	4.67635	2.92033e-06	0.00010159
REEP6	0.377143	-0.603267	0.37349	chr19	1491180	1497927	4397	ENST00000395479.10	ENSG00000115255.12	ENSG00000115255	19	1491166	1497927	1067.09	-0.400187	0.143501	-2.78874	0.00529136	0.0425836
PIK3C3	-0.536166	0.669948	0.373656	chr18	41955233	42087830	1414	ENST00000262039.9	ENSG00000078142.14	ENSG00000078142	18	41955234	42087830	546.022	0.298479	0.0963771	3.09699	0.00195499	0.0211248
ZNF143	-0.493068	0.652415	0.373923	chr11	9461011	9528524	11877	ENST00000396602.7	ENSG00000166478.10	ENSG00000166478	11	9460319	9528524	678.662	0.364944	0.121005	3.01594	0.00256188	0.02551
FAM184A	-0.836445	0.79758	0.374702	chr6	118959762	119078664	3979	ENST00000338891.12	ENSG00000111879.20	ENSG00000111879	6	118959763	119149387	322.36	0.451198	0.122375	3.68699	0.000226918	0.00392161
RANBP10	-0.495598	0.655204	0.374913	chr16	67723069	67806560	8076	ENST00000317506.8	ENSG00000141084.12	ENSG00000141084	16	67723070	67806560	1171.29	0.303305	0.100139	3.02883	0.00245504	0.0248132
RBM3	0.469981	-0.645034	0.375242	chrX	48574483	48581162	2666	ENST00000376759.8	ENSG00000102317.18	ENSG00000102317	X	48574449	48581162	15187.8	-0.214724	0.0720111	-2.98182	0.00286544	0.0276642
SZT2	-0.402208	0.617019	0.37549	chr1	43389898	43454247	17684	ENST00000634258.3	ENSG00000198198.17	ENSG00000198198	1	43389882	43454247	718.794	0.388205	0.136102	2.85231	0.00434032	0.0371476
CHD6	-0.355061	0.598093	0.376032	chr20	41402082	41618377	5476	ENST00000373233.8	ENSG00000124177.16	ENSG00000124177	20	41402083	41618384	953.56	0.536995	0.194224	2.76482	0.00569545	0.0450622
ARRDC2	-0.979119	0.86211	0.37679	chr19	18008169	18014102	3156	ENST00000222250.5	ENSG00000105643.11	ENSG00000105643	19	18001132	18014102	455.35	0.530371	0.133082	3.9853	6.73956e-05	0.00146827
CRCP	-0.734748	0.759667	0.377023	chr7	66114846	66154568	37529	ENST00000395326.8	ENSG00000241258.7	ENSG00000241258	7	66114604	66154568	1246.66	0.437775	0.124661	3.51173	0.000445196	0.00677689
KMT2E	-0.477367	0.65294	0.378026	chr7	105014204	105115019	101	ENST00000311117.8	ENSG00000005483.23	ENSG00000005483	7	104940943	105115019	656.241	0.484576	0.160543	3.01836	0.00254143	0.0253894
CHD2	-1.29931	1.00082	0.378251	chr15	92900323	93027996	13553	ENST00000394196.9	ENSG00000173575.24	ENSG00000173575	15	92886203	93027996	1424.16	0.582762	0.125962	4.6265	3.71891e-06	0.000123021
PTCD3	-0.834331	0.804481	0.378364	chr2	86106234	86142157	6565	ENST00000254630.12	ENSG00000132300.19	ENSG00000132300	2	86106223	86142157	2983.76	0.232215	0.0624421	3.71889	0.000200098	0.00354329
DGKQ	-0.518818	0.672383	0.379114	chr4	958886	973569	8678	ENST00000273814.8	ENSG00000145214.14	ENSG00000145214	4	958887	986895	872.502	0.293855	0.0945405	3.10824	0.00188204	0.0205841
POGZ	-0.945944	0.854168	0.379469	chr1	151402723	151459494	8409	ENST00000271715.7	ENSG00000143442.24	ENSG00000143442	1	151402724	151459494	2491.96	0.509722	0.12909	3.94858	7.86149e-05	0.00167997
SENP8	-0.755662	0.774733	0.380091	chr15	72118402	72143692	11797	ENST00000340912.6	ENSG00000166192.15	ENSG00000166192	15	72114258	72143692	193.934	0.437264	0.122094	3.58138	0.000341785	0.00541235
VILL	-0.568456	0.696339	0.380711	chr3	37990785	38007185	7213	ENST00000383759.7	ENSG00000136059.16	ENSG00000136059	3	37988059	38007188	127.906	0.52555	0.163266	3.21898	0.00128647	0.0155182
FBXO38	-0.510618	0.671818	0.380762	chr5	148383957	148442836	8774	ENST00000340253.10	ENSG00000145868.17	ENSG00000145868	5	148383935	148442836	1041.73	0.38693	0.12459	3.10563	0.00189874	0.0207038
ADAMTS17	-0.547744	0.689205	0.381642	chr15	99971436	100341975	7983	ENST00000268070.9	ENSG00000140470.15	ENSG00000140470	15	99971437	100342005	250.958	0.383687	0.120429	3.18601	0.00144251	0.0170197
INTS6	-1.255	0.994516	0.383039	chr13	51361576	51453036	2706	ENST00000311234.9	ENSG00000102786.15	ENSG00000102786	13	51354077	51454264	506.491	0.63294	0.137674	4.59737	4.27852e-06	0.000138974
RND1	-1.34566	1.03496	0.383644	chr12	48857144	48865870	13355	ENST00000309739.6	ENSG00000172602.11	ENSG00000172602	12	48857145	48865870	141.779	0.720519	0.150599	4.78434	1.71549e-06	6.42355e-05
BLVRB	0.440182	-0.647545	0.384145	chr19	40447767	40465745	1861	ENST00000263368.9	ENSG00000090013.11	ENSG00000090013	19	40447765	40465764	1163.99	-0.333106	0.111279	-2.99342	0.00275868	0.0268909
TFAP2A	-1.46051	1.08653	0.384467	chr6	10396676	10415074	7435	ENST00000379613.10	ENSG00000137203.15	ENSG00000137203	6	10393186	10419659	1298.81	0.359464	0.0715673	5.02275	5.09378e-07	2.11998e-05
COG1	-0.327737	0.599953	0.384586	chr17	73193054	73208507	11921	ENST00000299886.9	ENSG00000166685.13	ENSG00000166685	17	73193055	73208507	1335.74	0.218269	0.0787003	2.77342	0.00554705	0.0440821
HOXC4	-0.31171	0.593082	0.384597	chr12	54053834	54056030	17722	ENST00000430889.3	ENSG00000198353.8	ENSG00000198353	12	54016931	54056030	929.471	0.318009	0.115992	2.74165	0.00611306	0.0473074
TAF1A	-0.449451	0.652834	0.384917	chr1	222558311	222589933	8422	ENST00000352967.9	ENSG00000143498.18	ENSG00000143498	1	222557902	222589933	198.607	0.584384	0.193641	3.01787	0.00254557	0.0253945
MEIS1	-0.728006	0.776475	0.386812	chr2	66435124	66573869	8513	ENST00000272369.14	ENSG00000143995.20	ENSG00000143995	2	66433452	66573869	518.095	0.41693	0.116155	3.58943	0.000331402	0.00530244
DCAF4	-0.409473	0.639449	0.387227	chr14	72926463	72959703	4928	ENST00000358377.7	ENSG00000119599.17	ENSG00000119599	14	72926377	72959703	975.33	0.275324	0.0931407	2.956	0.00311658	0.029353
SGSH	-0.77557	0.79811	0.387332	chr17	80209275	80220333	15068	ENST00000326317.11	ENSG00000181523.13	ENSG00000181523	17	80206716	80220923	1057.15	0.291369	0.0789738	3.68944	0.000224745	0.00390282
DEPDC5	-0.855241	0.833679	0.387833	chr22	31754018	31908033	2208	ENST00000651528.2	ENSG00000100150.20	ENSG00000100150	22	31753867	31908033	472.829	0.419713	0.108907	3.85387	0.000116267	0.00228875
PPT1	0.522962	-0.69013	0.388106	chr1	40072711	40097252	6428	ENST00000642050.2	ENSG00000131238.18	ENSG00000131238	1	40072710	40097260	5653.83	-0.22774	0.0713856	-3.19028	0.00142135	0.0168438
KDM8	-0.410203	0.641223	0.38811	chr16	27203525	27221768	9901	ENST00000286096.9	ENSG00000155666.12	ENSG00000155666	16	27203508	27221768	502.633	0.378006	0.127524	2.9642	0.00303473	0.0288594
N4BP1	-1.02511	0.911028	0.389421	chr16	48538725	48610180	2731	ENST00000262384.4	ENSG00000102921.8	ENSG00000102921	16	48538726	48620148	1171.57	0.443632	0.10534	4.21143	2.5376e-05	0.000640877
FAM120B	-0.475785	0.672186	0.389567	chr6	170306757	170407067	4090	ENST00000476287.4	ENSG00000112584.14	ENSG00000112584	6	170290703	170407067	1571.9	0.367388	0.118233	3.10733	0.00188784	0.0206266
FAM120B	-0.475785	0.672186	0.389567	chr6_KI270798v1_alt	17940	141909	55795	ENST00000619268.4	ENSG00000275333.4	ENSG00000275333	HSCHR6_1_CTG5	17941	143626	1571.9	0.367388	0.118233	3.10733	0.00188784	0.0206266
KDM3A	-0.577122	0.717162	0.390031	chr2	86441370	86492716	4457	ENST00000312912.10	ENSG00000115548.17	ENSG00000115548	2	86440647	86492716	1602.17	0.402173	0.12131	3.31524	0.000915632	0.0119398
RBM6	-0.787471	0.809247	0.390217	chr3	49940149	50077249	54	ENST00000266022.9	ENSG00000004534.15	ENSG00000004534	3	49940007	50100045	2761.94	0.24752	0.0661655	3.74093	0.000183343	0.00331741
SLC16A1-AS1	-0.956873	0.883373	0.390325	chr1	112956823	113047051	27174	ENST00000627431.2	ENSG00000226419.8	ENSG00000226419	1	112956415	113047055	99.4819	0.767807	0.188022	4.08359	4.43449e-05	0.00104538
CLPTM1	0.704518	-0.773651	0.390512	chr19	44955379	44993341	2982	ENST00000337392.10	ENSG00000104853.16	ENSG00000104853	19	44954585	44993341	5788.86	-0.21678	0.0606143	-3.57638	0.00034839	0.00549275
SLC48A1	0.296823	-0.595942	0.390667	chr12	47773237	47782751	21640	ENST00000442218.3	ENSG00000211584.14	ENSG00000211584	12	47753916	47782751	457.09	-0.483773	0.175606	-2.75488	0.00587145	0.0458824
SMG9	-0.742388	0.790656	0.390747	chr19	43727982	43754962	3194	ENST00000270066.11	ENSG00000105771.14	ENSG00000105771	19	43727983	43754962	2457.19	0.382041	0.104526	3.65498	0.000257199	0.00434058
DENND3	-0.452058	0.663875	0.390756	chr8	141128588	141195804	3083	ENST00000519811.6	ENSG00000105339.11	ENSG00000105339	8	141117278	141195808	372.431	0.381719	0.124382	3.06891	0.00214839	0.0224873
VPS51	0.432284	-0.655663	0.391009	chr11	65096213	65111862	9276	ENST00000279281.8	ENSG00000149823.10	ENSG00000149823	11	65089324	65111862	2950.96	-0.177256	0.058482	-3.03095	0.00243786	0.0247551
UNK	-0.733683	0.78757	0.391102	chr17	75784805	75825799	6603	ENST00000589666.6	ENSG00000132478.10	ENSG00000132478	17	75784806	75825799	2225.18	0.304714	0.0836962	3.64072	0.000271879	0.00451763
YTHDC1	-0.453464	0.667177	0.392336	chr4	68310386	68350090	1616	ENST00000344157.9	ENSG00000083896.13	ENSG00000083896	4	68310387	68350090	2322.63	0.226573	0.073463	3.08417	0.00204118	0.0216655
YTHDC1	-0.453464	0.667177	0.392336	chr4_GL000257v2_alt	4028	43731	55746	ENST00000615500.4	ENSG00000275272.4	ENSG00000275272	HSCHR4_1_CTG9	4029	43731	2322.63	0.226573	0.073463	3.08417	0.00204118	0.0216655
NDOR1	-1.28727	1.03385	0.392732	chr9	137205699	137219361	16745	ENST00000684003.1	ENSG00000188566.15	ENSG00000188566	9	137205685	137219361	2453.23	0.340187	0.0711808	4.77919	1.75999e-06	6.47772e-05
FBF1	-0.421168	0.654452	0.3932	chr17	75909573	75941042	16836	ENST00000636174.2	ENSG00000188878.20	ENSG00000188878	17	75909574	75941140	370.827	0.476757	0.157587	3.02535	0.00248345	0.025006
CSNK1D	-0.476091	0.679545	0.393754	chr17	82242666	82273700	8146	ENST00000314028.11	ENSG00000141551.15	ENSG00000141551	17	82239023	82273700	6853.55	0.207412	0.0660265	3.14135	0.00168172	0.0189703
MXD1	-0.332849	0.617086	0.394124	chr2	69915108	69942945	804	ENST00000264444.7	ENSG00000059728.11	ENSG00000059728	2	69897688	69942945	359.805	0.378038	0.132523	2.85262	0.00433608	0.0371476
SDCCAG8	-0.595565	0.733009	0.39423	chr1	243256040	243500091	726	ENST00000366541.8	ENSG00000054282.16	ENSG00000054282	1	243256034	243500091	275.479	0.432792	0.127724	3.3885	0.000702766	0.00979151
SDCCAG8	-0.595565	0.733009	0.39423	chr1_KI270763v1_alt	268177	512198	56405	ENST00000627744.2	ENSG00000276111.3	ENSG00000276111	HSCHR1_3_CTG32_1	268164	512199	275.479	0.432792	0.127724	3.3885	0.000702766	0.00979151
AP1G2	-0.443965	0.667933	0.395249	chr14	23559566	23567791	22777	ENST00000397120.8	ENSG00000213983.12	ENSG00000213983	14	23559565	23568070	1143.43	0.333497	0.108009	3.08767	0.00201732	0.0215528
LRRC37B	-1.40425	1.09342	0.39571	chr17	32007382	32053487	15921	ENST00000543378.7	ENSG00000185158.13	ENSG00000185158	17	32007383	32053504	204.266	0.824455	0.16311	5.0546	4.31289e-07	1.81712e-05
GMIP	-0.303409	0.607326	0.396218	chr19	19629475	19643657	1846	ENST00000203556.9	ENSG00000089639.11	ENSG00000089639	19	19629476	19643657	243.298	0.393002	0.139983	2.8075	0.00499274	0.0409132
WDR27	-0.501362	0.695251	0.396368	chr6	169457211	169702029	15751	ENST00000448612.6	ENSG00000184465.16	ENSG00000184465	6	169457212	169702067	295.852	0.340078	0.105813	3.21396	0.0013092	0.0157571
RBM5	-1.18864	1.00517	0.398525	chr3	50088918	50119021	43	ENST00000347869.8	ENSG00000003756.17	ENSG00000003756	3	50088919	50119021	3880.07	0.308571	0.0664077	4.64661	3.37426e-06	0.000114069
NPHP4	-1.18641	1.00722	0.399737	chr1	5862810	5992425	6485	ENST00000378156.9	ENSG00000131697.18	ENSG00000131697	1	5862811	5992473	566.873	0.580404	0.124654	4.65612	3.2222e-06	0.000109755
PI4KAP2	-0.772306	0.822972	0.400106	chr22	21473034	21517533	15508	ENST00000450651.5	ENSG00000183506.17	ENSG00000183506	22	21473000	21517533	222.15	0.800103	0.210311	3.80437	0.000142163	0.00268492
KCNG3	-0.300759	0.612121	0.400119	chr2	42442016	42493982	12994	ENST00000306078.2	ENSG00000171126.8	ENSG00000171126	2	42442017	42493982	195.543	0.484772	0.171318	2.82967	0.00465964	0.0391657
SMYD4	-0.923706	0.891939	0.400673	chr17	1779484	1829902	16282	ENST00000305513.12	ENSG00000186532.12	ENSG00000186532	17	1779485	1830634	748.014	0.684446	0.165999	4.12319	3.73663e-05	0.000899461
CEP250	-0.667221	0.778105	0.401202	chr20	35455597	35519280	5786	ENST00000397527.6	ENSG00000126001.17	ENSG00000126001	20	35455164	35519280	1505.92	0.398655	0.110831	3.59696	0.000321952	0.00518973
UPF1	-0.458724	0.684875	0.401357	chr19	18831958	18868230	74	ENST00000262803.10	ENSG00000005007.14	ENSG00000005007	19	18831959	18868230	5317.59	0.296777	0.093739	3.16599	0.00154556	0.017917
HARBI1	-1.13367	0.988461	0.401687	chr11	46602860	46617227	14872	ENST00000326737.3	ENSG00000180423.4	ENSG00000180423	11	46602861	46617909	144.769	0.689597	0.150917	4.56938	4.89165e-06	0.000154697
SYDE2	-0.460855	0.686787	0.401916	chr1	85156888	85201016	2079	ENST00000341460.6	ENSG00000097096.10	ENSG00000097096	1	85156889	85201724	214.187	0.613403	0.193208	3.17483	0.00149927	0.0175169
ZNF780A	-0.678865	0.785089	0.402105	chr19	40073044	40090943	17541	ENST00000683561.1	ENSG00000197782.15	ENSG00000197782	19	40069152	40090943	428.877	0.405895	0.11184	3.62925	0.000284247	0.00467988
ZNF780A	-0.678865	0.785089	0.402105	chr19_KN196484v1_fix	344294	366031	59850	ENST00000629480.2	ENSG00000280568.2	ENSG00000280568	HG2021_PATCH	344295	366081	428.877	0.405895	0.11184	3.62925	0.000284247	0.00467988
KANK1	-0.454797	0.684825	0.402362	chr9	504694	746103	3391	ENST00000382297.7	ENSG00000107104.21	ENSG00000107104	9	470291	746105	678.434	0.480605	0.151814	3.16576	0.0015468	0.017917
DTX2	-1.19934	1.01997	0.402487	chr7	76461708	76505991	1911	ENST00000430490.7	ENSG00000091073.20	ENSG00000091073	7	76461676	76505995	577.618	0.437721	0.0928351	4.71504	2.41665e-06	8.60104e-05
DTX2	-1.19934	1.01997	0.402487	chr7_KI270809v1_alt	1316	5013	61032	ENST00000632696.1	ENSG00000282379.1	ENSG00000282379	HSCHR7_2_CTG4_4	286	5014	577.618	0.437721	0.0928351	4.71504	2.41665e-06	8.60104e-05
PMS2	-0.563994	0.734505	0.402676	chr7	5970924	6009049	5279	ENST00000265849.12	ENSG00000122512.17	ENSG00000122512	7	5970925	6009130	323.704	0.682808	0.201097	3.39542	0.000685245	0.00960947
TBC1D10A	-0.237679	0.587886	0.402843	chr22	30291989	30326941	2156	ENST00000215790.12	ENSG00000099992.16	ENSG00000099992	22	30291990	30326947	655.477	0.228175	0.0839609	2.71763	0.00657505	0.0497206
ZNF91	-0.76386	0.825738	0.403302	chr19	23357695	23395471	12063	ENST00000300619.12	ENSG00000167232.14	ENSG00000167232	19	23304991	23395471	115.04	0.864454	0.226465	3.81716	0.000134996	0.00257208
PAX6	-0.911621	0.893086	0.403637	chr11	31789025	31811322	182	ENST00000640368.2	ENSG00000007372.25	ENSG00000007372	11	31784779	31817961	921.488	0.376339	0.0911565	4.12849	3.65149e-05	0.000881396
TLK2	-1.04847	0.957077	0.404591	chr17	62478824	62615481	8908	ENST00000346027.10	ENSG00000146872.19	ENSG00000146872	17	62458658	62615481	1177.09	0.425342	0.0961375	4.4243	9.67533e-06	0.000276761
MLLT10	-0.776589	0.834795	0.404912	chr10	21534231	21743630	1426	ENST00000307729.12	ENSG00000078403.17	ENSG00000078403	10	21524646	21743630	1026.12	0.470632	0.121956	3.85903	0.000113838	0.00224841
FAM118A	-1.31809	1.08005	0.404984	chr22	45309933	45341955	2293	ENST00000441876.7	ENSG00000100376.12	ENSG00000100376	22	45308968	45341955	1254.43	0.386524	0.0774165	4.99279	5.95147e-07	2.41281e-05
SART3	-0.442263	0.683923	0.405167	chr12	108522213	108561173	1326	ENST00000546815.6	ENSG00000075856.12	ENSG00000075856	12	108522214	108561400	2731.03	0.24271	0.0767685	3.16159	0.00156911	0.0180318
EMC10	0.572847	-0.747151	0.407399	chr19	50476506	50490871	10637	ENST00000334976.11	ENSG00000161671.17	ENSG00000161671	19	50476400	50490871	6261.16	-0.231821	0.0671193	-3.45387	0.000552597	0.00805299
KANSL1	-1.41353	1.13269	0.408387	chr17	46029915	46193429	5012	ENST00000432791.7	ENSG00000120071.15	ENSG00000120071	17	46029916	46225389	1220.86	0.810934	0.154873	5.23611	1.63998e-07	7.49387e-06
KANSL1	-1.41353	1.13269	0.408387	chr17_GL000258v2_alt	563070	758707	56216	ENST00000627698.2	ENSG00000275867.3	ENSG00000275867	HSCHR17_1_CTG5	561512	758707	1220.86	0.810934	0.154873	5.23611	1.63998e-07	7.49387e-06
KANSL1	-1.41353	1.13269	0.408387	chr17_KI270908v1_alt	732079	927544	58173	ENST00000613150.3	ENSG00000278458.4	ENSG00000278458	HSCHR17_2_CTG5	732028	927544	1220.86	0.810934	0.154873	5.23611	1.63998e-07	7.49387e-06
ZNF23	-0.888031	0.89306	0.408493	chr16	71447596	71462247	12089	ENST00000647773.2	ENSG00000167377.19	ENSG00000167377	16	71447597	71463095	467.808	0.427358	0.103517	4.12837	3.65341e-05	0.000881396
ANKRD27	-0.328897	0.639772	0.40977	chr19	32597005	32675180	3050	ENST00000306065.9	ENSG00000105186.16	ENSG00000105186	19	32597006	32676597	1060.25	0.365375	0.123542	2.95749	0.00310153	0.029288
CCDC77	-0.617018	0.771746	0.409779	chr12	401643	442642	5076	ENST00000239830.9	ENSG00000120647.10	ENSG00000120647	12	389273	442642	773.473	0.360151	0.100951	3.56757	0.000360307	0.00566406
PLXNA3	-0.432477	0.687555	0.409975	chrX	154458280	154477779	6360	ENST00000369682.4	ENSG00000130827.6	ENSG00000130827	X	154458281	154477779	1148.06	0.332477	0.104606	3.17838	0.00148103	0.0173602
ZNF761	-0.904751	0.904938	0.410418	chr19	53431983	53458261	10488	ENST00000684525.1	ENSG00000160336.17	ENSG00000160336	19	53431984	53461862	333.135	0.525669	0.12566	4.18328	2.87335e-05	0.000720611
BTBD2	0.252737	-0.606561	0.410901	chr19	1985447	2015714	6741	ENST00000255608.9	ENSG00000133243.10	ENSG00000133243	19	1985438	2034881	3597.36	-0.19037	0.0678933	-2.80396	0.00504786	0.0412082
CENPC	-0.770179	0.845224	0.4114	chr4	67468761	67545503	8682	ENST00000273853.11	ENSG00000145241.11	ENSG00000145241	4	67468762	67545503	320.949	0.471963	0.120792	3.90724	9.33564e-05	0.00192865
HLA-DQB1	0.495493	-0.719285	0.411609	chr6	32659466	32666657	14675	ENST00000434651.7	ENSG00000179344.17	ENSG00000179344	6	32659467	32668383	429.999	-0.472339	0.142054	-3.32506	0.000884	0.0115692
HLA-DQB1	0.495493	-0.719285	0.411609	chr6_GL000251v2_alt	4072370	4079982	20402	ENST00000383121.2	ENSG00000206237.6	ENSG00000206237	HSCHR6_MHC_COX_CTG1	4072371	4079982	429.999	-0.472339	0.142054	-3.32506	0.000884	0.0115692
HLA-DQB1	0.495493	-0.719285	0.411609	chr6_GL000252v2_alt	3900295	3910237	32440	ENST00000422950.1	ENSG00000233209.6	ENSG00000233209	HSCHR6_MHC_DBB_CTG1	3900296	3910237	429.999	-0.472339	0.142054	-3.32506	0.000884	0.0115692
HLA-DQB1	0.495493	-0.719285	0.411609	chr6_GL000253v2_alt	4076916	4086211	26704	ENST00000424806.1	ENSG00000225824.8	ENSG00000225824	HSCHR6_MHC_MANN_CTG1	4076917	4086211	429.999	-0.472339	0.142054	-3.32506	0.000884	0.0115692
HLA-DQB1	0.495493	-0.719285	0.411609	chr6_GL000254v2_alt	3955833	3964882	30952	ENST00000413089.1	ENSG00000231286.7	ENSG00000231286	HSCHR6_MHC_MCF_CTG1	3955834	3964882	429.999	-0.472339	0.142054	-3.32506	0.000884	0.0115692
HLA-DQB1	0.495493	-0.719285	0.411609	chr6_GL000255v2_alt	3853334	3860946	20430	ENST00000383247.6	ENSG00000206302.10	ENSG00000206302	HSCHR6_MHC_QBL_CTG1	3853335	3860946	429.999	-0.472339	0.142054	-3.32506	0.000884	0.0115692
HLA-DQB1	0.495493	-0.719285	0.411609	chr6_GL000256v2_alt	4056697	4063945	31449	ENST00000414518.2	ENSG00000231939.5	ENSG00000231939	HSCHR6_MHC_SSTO_CTG1	4056698	4063945	429.999	-0.472339	0.142054	-3.32506	0.000884	0.0115692
STARD7-AS1	-0.295025	0.628997	0.41288	chr2	96208388	96242581	19995	ENST00000665242.2	ENSG00000204685.9	ENSG00000204685	2	96208389	96243353	127.777	0.489341	0.168293	2.90768	0.00364122	0.0326679
CEP68	-1.17166	1.03442	0.413233	chr2	65056415	65087004	304	ENST00000377990.7	ENSG00000011523.15	ENSG00000011523	2	65056354	65087004	956.002	0.431916	0.0903245	4.78183	1.73704e-06	6.47772e-05
RRP7BP	-0.83756	0.883727	0.41493	chr22	42574732	42582001	15346	ENST00000566851.7	ENSG00000182841.15	ENSG00000182841	22	42574733	42582001	982.72	0.528655	0.129407	4.08523	4.40341e-05	0.00104137
RRP7BP	-0.83756	0.883727	0.41493	chr22	42555211	42582039	68862	ENST00000357802.7	ENSG00000291035.1	ENSG00000291035	22	42555212	42582039	982.72	0.528655	0.129407	4.08523	4.40341e-05	0.00104137
GZF1	-1.42959	1.15838	0.414963	chr20	23362181	23373062	5722	ENST00000338121.10	ENSG00000125812.16	ENSG00000125812	20	23362182	23373062	901.307	0.608675	0.113668	5.35487	8.56188e-08	4.17789e-06
ZCCHC8	-1.53861	1.20928	0.41508	chr12	122471599	122500932	498	ENST00000633063.3	ENSG00000033030.16	ENSG00000033030	12	122471600	122500932	1224.9	0.418868	0.0749293	5.59018	2.2684e-08	1.26748e-06
HOXD13	-0.51868	0.736376	0.415231	chr2	176092720	176095944	6074	ENST00000392539.4	ENSG00000128714.6	ENSG00000128714	2	176092721	176095944	5204.57	0.219672	0.0645321	3.40406	0.00066391	0.00935897
LAMA1	0.378057	-0.671149	0.415253	chr18	6941741	7117797	2567	ENST00000389658.4	ENSG00000101680.16	ENSG00000101680	18	6941742	7117797	712.477	-0.272643	0.0878776	-3.10254	0.00191871	0.0208372
RN7SK	0.735139	-0.838634	0.416124	chr6	52995620	52995948	61815	ENST00000636484.1	ENSG00000283293.1	ENSG00000283293	6	52995621	52995948	208.297	-1.07816	0.278108	-3.87677	0.000105851	0.00212965
ALKBH1	-0.941082	0.936271	0.41695	chr14	77672403	77708023	2357	ENST00000216489.8	ENSG00000100601.10	ENSG00000100601	14	77672404	77708023	932.917	0.397818	0.0919148	4.32812	1.50387e-05	0.00040616
MSL3P1	-0.236785	0.609264	0.417778	chr2	233865436	233868444	25511	ENST00000438684.1	ENSG00000224287.2	ENSG00000224287	2	233865437	233868444	144.559	0.415716	0.147602	2.81646	0.00485561	0.0400941
LGMN	0.285854	-0.634113	0.419058	chr14	92703808	92748627	2356	ENST00000334869.9	ENSG00000100600.15	ENSG00000100600	14	92703807	92748679	2826.84	-0.210764	0.0719006	-2.93133	0.00337515	0.0308978
BARD1	-1.15989	1.04572	0.419954	chr2	214725645	214809683	7663	ENST00000260947.9	ENSG00000138376.11	ENSG00000138376	2	214725646	214809683	553.462	0.875512	0.181112	4.83408	1.33763e-06	5.11525e-05
ERCC6L2	-0.199937	0.595712	0.420357	chr9	95875690	96018447	15184	ENST00000653738.2	ENSG00000182150.19	ENSG00000182150	9	95871264	96121154	758.742	0.429816	0.15608	2.75381	0.00589053	0.0459982
RBM39	-0.514964	0.74444	0.420763	chr20	35701346	35742260	6394	ENST00000253363.11	ENSG00000131051.24	ENSG00000131051	20	35701347	35742312	7199.5	0.180554	0.0524662	3.44134	0.000578839	0.00833405
PHF20	-0.385491	0.684476	0.421333	chr20	35772014	35950370	445	ENST00000374012.8	ENSG00000025293.17	ENSG00000025293	20	35771974	35950370	612.209	0.423243	0.133762	3.16415	0.00155539	0.0179524
ZNF19	-1.61565	1.26494	0.421718	chr16	71473582	71489324	10111	ENST00000288177.10	ENSG00000157429.16	ENSG00000157429	16	71464555	71565089	130.133	1.0345	0.176915	5.84745	4.99153e-09	3.30237e-07
BORA	-1.07722	1.01194	0.42205	chr13	72727922	72756196	7223	ENST00000390667.11	ENSG00000136122.18	ENSG00000136122	13	72727749	72756198	1524.49	0.293271	0.0626926	4.67793	2.89791e-06	0.000101136
MCL1	-0.43307	0.708455	0.42227	chr1	150574557	150579610	8394	ENST00000369026.3	ENSG00000143384.14	ENSG00000143384	1	150560895	150579738	6001.79	0.305295	0.09322	3.27499	0.00105665	0.0132963
TTI1	-0.468239	0.725499	0.42253	chr20	37983020	38033456	2523	ENST00000373447.8	ENSG00000101407.13	ENSG00000101407	20	37983007	38033461	1806.19	0.237252	0.0707414	3.35378	0.000797147	0.0106391
PNRC1	-1.16594	1.05537	0.422683	chr6	89080750	89085160	8838	ENST00000336032.4	ENSG00000146278.11	ENSG00000146278	6	89080751	89085160	946.143	0.504786	0.103467	4.8787	1.06788e-06	4.15741e-05
PALB2	-1.52132	1.22513	0.423327	chr16	23603164	23641310	1585	ENST00000261584.9	ENSG00000083093.11	ENSG00000083093	16	23603160	23641321	784.291	0.65021	0.114808	5.66344	1.48366e-08	8.46551e-07
AKAP8L	-0.925694	0.943718	0.42351	chr19	15380049	15418988	287	ENST00000397410.10	ENSG00000011243.19	ENSG00000011243	19	15380050	15419141	2517.42	0.381469	0.0874417	4.36255	1.28555e-05	0.000352579
TRNT1	-0.284306	0.640248	0.423596	chr3	3126939	3149023	1203	ENST00000251607.11	ENSG00000072756.18	ENSG00000072756	3	3126933	3153435	417.451	0.289714	0.0978865	2.95969	0.0030795	0.0291566
STRIP1	-0.403014	0.696538	0.42365	chr1	110034623	110054641	8322	ENST00000369795.8	ENSG00000143093.15	ENSG00000143093	1	110031577	110074641	1540.11	0.280453	0.0870999	3.2199	0.00128234	0.0154975
ZNF354B	-0.973161	0.967152	0.423933	chr5	178859952	178885020	14480	ENST00000322434.8	ENSG00000178338.11	ENSG00000178338	5	178859953	178888122	316.285	0.843137	0.188584	4.47088	7.78989e-06	0.000227544
LEPROT	0.278254	-0.638255	0.424177	chr1	65420667	65436007	22596	ENST00000371065.9	ENSG00000213625.9	ENSG00000213625	1	65420587	65436007	731.856	-0.295015	0.0999889	-2.95048	0.00317281	0.0296666
BRD9	-0.426067	0.708903	0.424518	chr5	863740	892801	472	ENST00000467963.6	ENSG00000028310.18	ENSG00000028310	5	850291	892801	1747.8	0.257952	0.0787145	3.27706	0.00104892	0.0132917
SULT4A1	-1.16083	1.05878	0.425021	chr22	43824508	43862513	6290	ENST00000330884.9	ENSG00000130540.14	ENSG00000130540	22	43824509	43862513	477.559	0.664694	0.135805	4.89446	9.85751e-07	3.86536e-05
TSPAN6	0.367653	-0.684431	0.42654	chrX	100627107	100636806	1	ENST00000373020.9	ENSG00000000003.16	ENSG00000000003	X	100627108	100639991	4161.84	-0.234567	0.0741376	-3.16393	0.00155652	0.0179524
NAA25	-0.394087	0.697555	0.426859	chr12	112026688	112108783	3881	ENST00000261745.9	ENSG00000111300.10	ENSG00000111300	12	112026689	112108796	2167.57	0.399102	0.123768	3.2246	0.00126147	0.0152851
STT3A	0.365407	-0.683949	0.426907	chr11	125592851	125623091	6989	ENST00000392708.9	ENSG00000134910.14	ENSG00000134910	11	125591712	125625215	7073.56	-0.194742	0.0615938	-3.16171	0.00156847	0.0180318
ALKBH8	-0.321826	0.663964	0.427428	chr11	107502726	107565735	7539	ENST00000428149.7	ENSG00000137760.15	ENSG00000137760	11	107502727	107565742	704.147	0.382433	0.124599	3.06932	0.00214544	0.0224844
EED	-0.182188	0.597692	0.427741	chr11	86244752	86278810	1257	ENST00000263360.11	ENSG00000074266.23	ENSG00000074266	11	86201212	86278813	1498.05	0.304133	0.110075	2.76297	0.00572787	0.0451926
TBX3	-0.875827	0.931967	0.428966	chr12	114670254	114684175	7021	ENST00000349155.7	ENSG00000135111.16	ENSG00000135111	12	114670255	114684175	1674.74	0.580745	0.134799	4.30823	1.64569e-05	0.000438201
EIF5	-0.76422	0.878887	0.429176	chr14	103334236	103345025	2372	ENST00000216554.8	ENSG00000100664.11	ENSG00000100664	14	103333544	103345025	8709.44	0.329741	0.0811599	4.06285	4.84765e-05	0.00112739
COG3	-0.91641	0.954952	0.430556	chr13	45464938	45536701	7230	ENST00000349995.10	ENSG00000136152.15	ENSG00000136152	13	45464898	45536701	505.596	0.595684	0.134939	4.41448	1.01253e-05	0.000288104
DAGLB	-1.01905	1.00453	0.430633	chr7	6409128	6447954	11385	ENST00000297056.11	ENSG00000164535.15	ENSG00000164535	7	6409126	6484190	1027.03	0.423391	0.0911765	4.64364	3.42317e-06	0.000114644
USP42	-0.953137	0.9729	0.430678	chr7	6104948	6161564	3298	ENST00000306177.10	ENSG00000106346.12	ENSG00000106346	7	6104949	6161564	546.799	0.708211	0.157469	4.49745	6.87732e-06	0.000205443
MAP3K15	-0.186675	0.604004	0.430713	chrX	19360058	19515508	14941	ENST00000338883.9	ENSG00000180815.15	ENSG00000180815	X	19360056	19515508	260.965	0.337324	0.120812	2.79215	0.00523596	0.0422639
CC2D1B	-0.926879	0.960832	0.430934	chr1	52350596	52366205	9750	ENST00000284376.8	ENSG00000154222.15	ENSG00000154222	1	52345723	52366205	1728.05	0.2857	0.0643227	4.44166	8.92658e-06	0.000258081
ZNF195	-1.48614	1.23049	0.431036	chr11	3357926	3379146	105	ENST00000399602.9	ENSG00000005801.18	ENSG00000005801	11	3339261	3379222	1233.95	0.46079	0.081008	5.6882	1.28383e-08	7.48367e-07
FKBP15	-1.06879	1.03027	0.431388	chr9	113161005	113221277	4894	ENST00000238256.8	ENSG00000119321.10	ENSG00000119321	9	113161006	113221458	1250.34	0.481282	0.101054	4.76263	1.91081e-06	6.93812e-05
CAPN1	0.576691	-0.793224	0.43151	chr11	65181927	65212006	349	ENST00000279247.11	ENSG00000014216.16	ENSG00000014216	11	65180566	65212006	3231.54	-0.218028	0.0594591	-3.66686	0.00024555	0.00417667
TEP1	-1.03615	1.01523	0.431684	chr14	20365666	20413501	6165	ENST00000262715.10	ENSG00000129566.13	ENSG00000129566	14	20365667	20413501	355.927	0.761425	0.162243	4.69311	2.69078e-06	9.45193e-05
TEP1	-1.03615	1.01523	0.431684	chr14_MU273373v1_fix	568347	616182	69566	ENST00000708760.1	ENSG00000291791.1	ENSG00000291791	HG2526_HG2573_PATCH	568348	616182	355.927	0.761425	0.162243	4.69311	2.69078e-06	9.45193e-05
CEP152	-1.21707	1.10317	0.431942	chr15	48737937	48811069	2869	ENST00000380950.7	ENSG00000103995.14	ENSG00000103995	15	48712928	48811146	360.515	0.65787	0.129003	5.09967	3.40246e-07	1.46768e-05
USP37	-0.95183	0.975138	0.431948	chr2	218450250	218568351	7175	ENST00000258399.8	ENSG00000135913.11	ENSG00000135913	2	218450251	218568351	717.402	0.579309	0.128513	4.50779	6.55053e-06	0.00019955
IKBKB	-1.01227	1.00676	0.433	chr8	42271301	42332460	2913	ENST00000520810.6	ENSG00000104365.16	ENSG00000104365	8	42271302	42332460	1284.97	0.347379	0.0746411	4.65399	3.25577e-06	0.00011041
NSUN4	-0.538656	0.778679	0.433626	chr1	46340806	46365018	4724	ENST00000474844.6	ENSG00000117481.11	ENSG00000117481	1	46340789	46365152	1268.82	0.38278	0.106339	3.59962	0.000318682	0.00514652
PGS1	-1.22516	1.11281	0.434178	chr17	78378648	78424659	1728	ENST00000262764.11	ENSG00000087157.19	ENSG00000087157	17	78378649	78425114	1204.04	0.392602	0.0763189	5.14423	2.6862e-07	1.18237e-05
CENPJ	-1.30582	1.15268	0.434451	chr13	24882278	24922861	9477	ENST00000381884.9	ENSG00000151849.16	ENSG00000151849	13	24882279	24922889	769.367	0.516403	0.096913	5.32852	9.90164e-08	4.72475e-06
ZSCAN2	-1.30777	1.15368	0.43447	chr15	84601008	84623716	14078	ENST00000546148.6	ENSG00000176371.14	ENSG00000176371	15	84600986	84627796	555.701	0.476724	0.0893892	5.33312	9.65371e-08	4.62691e-06
ZSCAN2	-1.30777	1.15368	0.43447	chr15_MU273374v1_fix	1092850	1115562	69410	ENST00000708197.1	ENSG00000291625.1	ENSG00000291625	HG2280_PATCH	1092832	1119642	555.701	0.476724	0.0893892	5.33312	9.65371e-08	4.62691e-06
ARVCF	-0.295045	0.663001	0.435194	chr22	19969895	20016823	2134	ENST00000263207.8	ENSG00000099889.14	ENSG00000099889	22	19969896	20016823	337.673	0.394204	0.12862	3.06487	0.00217763	0.0226978
SDC2	0.212139	-0.625256	0.436998	chr8	96493812	96611790	12611	ENST00000302190.9	ENSG00000169439.12	ENSG00000169439	8	96493813	96611790	1604.04	-0.228591	0.0790867	-2.89038	0.0038477	0.0339278
CCDC9	-0.640131	0.836242	0.438017	chr19	47256524	47271953	3078	ENST00000221922.11	ENSG00000105321.14	ENSG00000105321	19	47255980	47273701	467.472	0.391672	0.101319	3.86572	0.000110764	0.0022079
SIK3	-0.627901	0.831562	0.438706	chr11	116843401	117098428	10513	ENST00000445177.6	ENSG00000160584.17	ENSG00000160584	11	116843402	117098437	952.169	0.489078	0.127229	3.84408	0.000121004	0.00235717
ZKSCAN3	-0.948831	0.991573	0.439881	chr6	28349946	28369172	16938	ENST00000252211.7	ENSG00000189298.14	ENSG00000189298	6	28349947	28369172	318.989	0.575719	0.125599	4.58377	4.56672e-06	0.000146834
ZBTB5	-0.379743	0.713235	0.440779	chr9	37438101	37465450	12449	ENST00000307750.5	ENSG00000168795.5	ENSG00000168795	9	37438102	37465450	954.375	0.32629	0.0989632	3.29709	0.000976922	0.0125568
ATP1A1	0.525568	-0.785943	0.441266	chr1	116373243	116404774	11005	ENST00000295598.10	ENSG00000163399.16	ENSG00000163399	1	116372668	116410261	28749.5	-0.231188	0.0636321	-3.6332	0.000279928	0.00463709
GTF2IRD1	-0.652052	0.851875	0.443112	chr7	74453905	74602605	152	ENST00000424337.7	ENSG00000006704.11	ENSG00000006704	7	74453790	74602605	710.527	0.348732	0.0885559	3.93798	8.21694e-05	0.00173748
MSX2	-1.31823	1.18296	0.443547	chr5	174724581	174730896	5019	ENST00000239243.7	ENSG00000120149.9	ENSG00000120149	5	174724582	174730896	1875.7	0.510394	0.0933332	5.46852	4.53816e-08	2.34161e-06
PRDX3	0.16101	-0.610717	0.444594	chr10	119167719	119178812	11664	ENST00000298510.4	ENSG00000165672.7	ENSG00000165672	10	119167720	119178812	10921.4	-0.190913	0.0676235	-2.82318	0.00475505	0.0396649
ZXDC	-0.874937	0.967399	0.445479	chr3	126437600	126475891	1115	ENST00000389709.8	ENSG00000070476.15	ENSG00000070476	3	126437601	126475891	1621.76	0.429533	0.0960489	4.47202	7.74837e-06	0.000227061
AKAP10	-0.367307	0.715898	0.446258	chr17	19904301	19977828	3564	ENST00000225737.11	ENSG00000108599.15	ENSG00000108599	17	19904302	19978343	596.511	0.415474	0.125544	3.3094	0.000934964	0.0121478
ANKRD23	-0.842123	0.95436	0.447024	chr2	96837911	96844021	10933	ENST00000318357.9	ENSG00000163126.15	ENSG00000163126	2	96824526	96857934	127.201	0.72631	0.164631	4.41174	1.02542e-05	0.000291003
C1orf112	-0.550924	0.809463	0.447353	chr1	169795039	169854080	5	ENST00000359326.9	ENSG00000000460.17	ENSG00000000460	1	169662007	169854080	1294.38	0.270773	0.0723619	3.74192	0.000182617	0.00330981
CWC25	-0.90751	0.988808	0.44783	chr17	38800440	38825321	54456	ENST00000614790.5	ENSG00000273559.5	ENSG00000273559	17	38800441	38825355	1086.43	0.386262	0.084503	4.57099	4.85427e-06	0.000153966
CWC25	-0.90751	0.988808	0.44783	chr17_KI270857v1_alt	2835752	2860800	56896	ENST00000614868.2	ENSG00000276761.2	ENSG00000276761	HSCHR17_7_CTG4	2835753	2860800	1086.43	0.386262	0.084503	4.57099	4.85427e-06	0.000153966
GCHFR	0.291395	-0.680795	0.448074	chr15	40764067	40767708	7577	ENST00000260447.6	ENSG00000137880.6	ENSG00000137880	15	40764068	40767708	560.689	-0.430731	0.136865	-3.14713	0.00164882	0.0186578
AKAP8	-0.596697	0.834956	0.448754	chr19	15353384	15379787	3038	ENST00000269701.7	ENSG00000105127.10	ENSG00000105127	19	15353385	15379815	2429.66	0.24372	0.0631437	3.85977	0.000113492	0.00224569
NOM1	-0.737933	0.905919	0.448815	chr7	156949711	156973176	8910	ENST00000275820.4	ENSG00000146909.8	ENSG00000146909	7	156949712	156973176	1892.83	0.498106	0.118942	4.18781	2.81656e-05	0.000708014
FUZ	0.401997	-0.737461	0.448851	chr19	49806865	49813292	262	ENST00000313777.9	ENSG00000010361.14	ENSG00000010361	19	49806866	49817376	1487.19	-0.286412	0.0840143	-3.40908	0.000651823	0.00921266
CYBA	0.210101	-0.641674	0.449188	chr16	88643288	88651053	694	ENST00000261623.8	ENSG00000051523.12	ENSG00000051523	16	88643275	88651083	4104.08	-0.38094	0.128423	-2.96628	0.00301426	0.0287656
PBX4	-0.122948	0.597925	0.449193	chr19	19561712	19618687	3184	ENST00000251203.14	ENSG00000105717.14	ENSG00000105717	19	19561707	19618693	133.079	0.640963	0.231893	2.76404	0.00570897	0.045103
PPP4R3A	-0.637215	0.857326	0.449828	chr14	91457507	91510310	2388	ENST00000554943.6	ENSG00000100796.18	ENSG00000100796	14	91457508	91510554	2823.24	0.386525	0.097529	3.96318	7.39574e-05	0.00158876
MCM9	-0.314412	0.695355	0.450037	chr6	118813454	118935159	3978	ENST00000619706.5	ENSG00000111877.18	ENSG00000111877	6	118813442	118935162	854.372	0.523951	0.162999	3.21444	0.00130701	0.0157484
VAMP3	0.107638	-0.591935	0.450484	chr1	7771295	7781432	657	ENST00000054666.11	ENSG00000049245.13	ENSG00000049245	1	7771296	7781432	3525.36	-0.242724	0.0887036	-2.73635	0.00621243	0.0478534
SREBF1	-0.257189	0.667831	0.450887	chr17	17811333	17836986	1188	ENST00000261646.11	ENSG00000072310.18	ENSG00000072310	17	17810399	17837002	1990.2	0.303945	0.0984533	3.0872	0.00202053	0.0215528
TMEM9B	0.134652	-0.607694	0.452089	chr11	8947201	8964442	13887	ENST00000534025.6	ENSG00000175348.11	ENSG00000175348	11	8947202	8965011	699.049	-0.259303	0.0923049	-2.8092	0.00496643	0.0407595
WDR43	-0.244972	0.665077	0.453206	chr2	28894666	28948219	11148	ENST00000407426.8	ENSG00000163811.12	ENSG00000163811	2	28894667	28948219	4159.46	0.388064	0.126222	3.07447	0.00210878	0.0221648
ELAVL1	0.353948	-0.720571	0.45339	chr19	7958572	8005641	959	ENST00000407627.7	ENSG00000066044.15	ENSG00000066044	19	7958573	8005659	7080.27	-0.181155	0.0543846	-3.331	0.000865344	0.0113388
SEMA4B	-0.486225	0.787852	0.453535	chr15	90201329	90229660	15888	ENST00000411539.7	ENSG00000185033.15	ENSG00000185033	15	90160604	90229679	326.143	0.404558	0.111081	3.64202	0.000270503	0.00451564
TPGS2	0.330065	-0.708747	0.453569	chr18	36794107	36829002	6963	ENST00000334295.9	ENSG00000134779.15	ENSG00000134779	18	36777647	36829216	8981.59	-0.203614	0.0621468	-3.27634	0.00105161	0.0132917
RANBP17	-0.206238	0.649372	0.455955	chr5	170862017	171300015	20021	ENST00000523189.6	ENSG00000204764.14	ENSG00000204764	5	170861870	171300015	464.946	0.281595	0.0938065	3.00187	0.00268329	0.026306
PTRH1	0.104344	-0.597565	0.456046	chr9	127713806	127715663	16391	ENST00000543175.5	ENSG00000187024.15	ENSG00000187024	9	127690348	127724873	339.913	-0.355773	0.128792	-2.76238	0.00573818	0.0452343
WDR90	-0.366409	0.733996	0.457825	chr16	649364	667830	10675	ENST00000293879.9	ENSG00000161996.19	ENSG00000161996	16	649311	667833	1292.57	0.287922	0.084856	3.39306	0.000691166	0.00966735
DNMBP	-1.40597	1.26726	0.458304	chr10	99875576	100009947	3429	ENST00000324109.9	ENSG00000107554.17	ENSG00000107554	10	99875577	100009947	492.916	0.805665	0.137527	5.85822	4.67862e-09	3.11446e-07
RNF169	-0.624598	0.86805	0.45885	chr11	74748848	74842413	11864	ENST00000299563.5	ENSG00000166439.6	ENSG00000166439	11	74748849	74842413	1158.36	0.465871	0.116098	4.01276	6.00135e-05	0.00134271
LARP1B	-0.170711	0.635457	0.458982	chr4	128061311	128211988	7730	ENST00000326639.11	ENSG00000138709.20	ENSG00000138709	4	128061286	128222931	988.356	0.272889	0.0928971	2.93754	0.00330824	0.0304144
DPM3	0.120656	-0.609972	0.459127	chr1	155139890	155140531	14624	ENST00000368400.5	ENSG00000179085.8	ENSG00000179085	1	155139891	155140595	872.162	-0.402029	0.142577	-2.81973	0.00480635	0.0398655
SEC24B	-0.0982387	0.598624	0.459246	chr4	109433814	109540896	7759	ENST00000265175.5	ENSG00000138802.11	ENSG00000138802	4	109433772	109540896	1097.21	0.493996	0.178514	2.76727	0.00565272	0.0447569
ZNF425	-1.34385	1.24285	0.461051	chr7	149102783	149126324	20080	ENST00000378061.7	ENSG00000204947.9	ENSG00000204947	7	149102784	149126324	184.035	0.764059	0.132987	5.74535	9.17312e-09	5.58887e-07
ZC3H7A	-0.438417	0.777811	0.461964	chr16	11750596	11797258	5257	ENST00000355758.9	ENSG00000122299.12	ENSG00000122299	16	11750586	11797258	1951.98	0.38203	0.106249	3.5956	0.000323639	0.00520913
ATP6AP2	0.202467	-0.656327	0.462206	chrX	40580969	40606848	15206	ENST00000636580.2	ENSG00000182220.15	ENSG00000182220	X	40579372	40606848	3405.77	-0.244644	0.0806338	-3.03402	0.00241319	0.0245972
SLC9A8	-0.576839	0.850036	0.462374	chr20	49812827	49892242	17551	ENST00000361573.3	ENSG00000197818.12	ENSG00000197818	20	49812713	49892242	631.456	0.378713	0.0963772	3.92948	8.51289e-05	0.00178953
XRCC2	-0.623516	0.874965	0.462801	chr7	152644775	152676141	17168	ENST00000359321.2	ENSG00000196584.4	ENSG00000196584	7	152644776	152676193	502.553	0.899111	0.222293	4.04472	5.23853e-05	0.00119687
MRM1	-0.849729	0.992539	0.463063	chr17	36601582	36608964	58300	ENST00000614766.5	ENSG00000278619.5	ENSG00000278619	17	36601583	36608964	1038.61	0.547046	0.119228	4.58824	4.47008e-06	0.000144327
MRM1	-0.849729	0.992539	0.463063	chr17_KI270857v1_alt	837065	844472	55435	ENST00000611231.2	ENSG00000274853.2	ENSG00000274853	HSCHR17_7_CTG4	837066	844472	1038.61	0.547046	0.119228	4.58824	4.47008e-06	0.000144327
AMBRA1	-0.654489	0.891507	0.463072	chr11	46396413	46594023	3790	ENST00000683756.1	ENSG00000110497.15	ENSG00000110497	11	46396414	46594125	1531.14	0.484377	0.117533	4.12119	3.76915e-05	0.000901253
ZNF180	-1.61521	1.38903	0.463166	chr19	44474442	44500522	12092	ENST00000592529.6	ENSG00000167384.11	ENSG00000167384	19	44474428	44500524	435.512	0.856933	0.133456	6.42109	1.35305e-10	1.24712e-08
ZNF26	-0.741909	0.938268	0.463821	chr12	132986366	133027102	17734	ENST00000328654.10	ENSG00000198393.8	ENSG00000198393	12	132986365	133032952	332.869	0.517586	0.119332	4.33736	1.44207e-05	0.00039172
CEP162	-0.894136	1.01753	0.463977	chr6	84124249	84227643	7051	ENST00000403245.8	ENSG00000135315.12	ENSG00000135315	6	84124241	84227643	312.173	0.546384	0.116159	4.70375	2.55432e-06	9.03139e-05
SLC7A3	0.102837	-0.608689	0.465134	chrX	70925578	70931096	11588	ENST00000374299.8	ENSG00000165349.12	ENSG00000165349	X	70925579	70931125	303	-0.407123	0.144688	-2.8138	0.00489593	0.0403036
DHX34	-0.257978	0.690858	0.466156	chr19	47349314	47382704	6968	ENST00000328771.9	ENSG00000134815.19	ENSG00000134815	19	47349315	47382704	3321.47	0.181823	0.0569327	3.19365	0.00140488	0.0167221
CLTB	0.200854	-0.661451	0.466407	chr5	176392500	176416539	13897	ENST00000310418.9	ENSG00000175416.16	ENSG00000175416	5	176392501	176416539	5797.79	-0.358403	0.117213	-3.05771	0.00223037	0.0230607
TSEN2	-0.113642	0.618215	0.468093	chr3	12484479	12533658	9812	ENST00000284995.11	ENSG00000154743.19	ENSG00000154743	3	12484421	12541549	786.09	0.278073	0.0973021	2.85784	0.0042654	0.0366518
NFX1	-0.855418	1.00836	0.469052	chr9	33290515	33371157	1686	ENST00000379540.8	ENSG00000086102.19	ENSG00000086102	9	33290512	33371157	2586.85	0.442345	0.0948962	4.66136	3.14132e-06	0.00010823
CCDC66	-1.30066	1.24375	0.469796	chr3	56557174	56621837	14864	ENST00000394672.8	ENSG00000180376.17	ENSG00000180376	3	56557161	56621837	656.959	0.581257	0.101097	5.74951	8.95005e-09	5.48394e-07
ZBTB10	-0.134534	0.631708	0.47	chr8	80486225	80526265	20148	ENST00000455036.8	ENSG00000205189.13	ENSG00000205189	8	80485619	80526265	1340.61	0.562379	0.192582	2.92021	0.00349795	0.0316563
FSCN1	0.208406	-0.671631	0.470783	chr7	5592815	5606655	1316	ENST00000382361.8	ENSG00000075618.18	ENSG00000075618	7	5592816	5606655	4461.53	-0.213538	0.0687774	-3.10477	0.00190429	0.0207433
TSPAN18	0.353602	-0.748101	0.470827	chr11	44726961	44932423	10127	ENST00000520358.7	ENSG00000157570.12	ENSG00000157570	11	44726465	44932423	643.023	-0.301286	0.0871206	-3.45826	0.000543669	0.00798764
EDRF1	-0.6306	0.89703	0.472493	chr10	125719708	125764139	3476	ENST00000356792.9	ENSG00000107938.18	ENSG00000107938	10	125719515	125764143	1438.24	0.439265	0.105931	4.14672	3.37266e-05	0.000822867
CDC25A	-0.706606	0.938301	0.473064	chr3	48157145	48188417	11222	ENST00000302506.8	ENSG00000164045.12	ENSG00000164045	3	48157146	48188417	4926.48	0.35303	0.0813901	4.33751	1.44108e-05	0.00039172
PAPOLG	-0.499846	0.829847	0.473559	chr2	60756267	60802086	4433	ENST00000238714.8	ENSG00000115421.13	ENSG00000115421	2	60756253	60802086	617.537	0.567241	0.147867	3.83615	0.000124976	0.00241964
TM9SF2	0.568418	-0.866158	0.473568	chr13	99501471	99564048	5633	ENST00000376387.5	ENSG00000125304.10	ENSG00000125304	13	99446311	99564048	3740.38	-0.26191	0.065412	-4.00401	6.22772e-05	0.00137622
ACSF3	-0.341442	0.747255	0.474352	chr16	89093851	89156233	14141	ENST00000614302.5	ENSG00000176715.17	ENSG00000176715	16	89088375	89164121	1185.5	0.280425	0.0811802	3.45436	0.000551609	0.00805299
MMS19	-0.0885067	0.614334	0.475264	chr10	97458323	97498422	9860	ENST00000438925.7	ENSG00000155229.21	ENSG00000155229	10	97458324	97498794	3159.72	0.198491	0.0698938	2.8399	0.00451281	0.0382824
FAAP20	0.0369742	-0.588205	0.476272	chr1	2189547	2194772	10772	ENST00000378546.9	ENSG00000162585.17	ENSG00000162585	1	2184461	2212720	2125.2	-0.371173	0.136506	-2.71911	0.00654582	0.0496414
TOP3A	-0.13758	0.641867	0.476352	chr17	18271427	18314994	14275	ENST00000321105.10	ENSG00000177302.15	ENSG00000177302	17	18271428	18315007	1452.24	0.47232	0.159182	2.96717	0.00300552	0.0287305
TOP3A	-0.13758	0.641867	0.476352	chr17_KV766198v1_alt	31801	75368	62602	ENST00000640743.2	ENSG00000284238.2	ENSG00000284238	HSCHR17_3_CTG1	31802	75381	1452.24	0.47232	0.159182	2.96717	0.00300552	0.0287305
SLF1	-0.69451	0.938889	0.476609	chr5	94618668	94697621	6748	ENST00000265140.10	ENSG00000133302.13	ENSG00000133302	5	94618669	94739436	528.527	0.628177	0.144734	4.34022	1.42338e-05	0.0003886
MAFB	-1.10079	1.15666	0.477164	chr20	40685847	40689236	19756	ENST00000373313.3	ENSG00000204103.4	ENSG00000204103	20	40685848	40689236	580.571	0.661193	0.123659	5.3469	8.94715e-08	4.32673e-06
AMOTL2	-0.683791	0.935914	0.478006	chr3	134355346	134374447	4253	ENST00000249883.10	ENSG00000114019.15	ENSG00000114019	3	134355347	134375479	403.196	0.746392	0.172517	4.32648	1.51514e-05	0.000407464
MMAA	-0.0889278	0.61843	0.478259	chr4	145619384	145660033	9437	ENST00000649156.2	ENSG00000151611.17	ENSG00000151611	4	145599042	145660033	98.6167	0.56786	0.198634	2.85883	0.00425205	0.0366209
MIS12	-1.45933	1.35111	0.478309	chr17	5486565	5490811	12221	ENST00000611091.5	ENSG00000167842.16	ENSG00000167842	17	5486285	5490814	1454.79	0.42972	0.0688013	6.24581	4.21605e-10	3.54698e-08
RIPK1	-0.553815	0.867193	0.478403	chr6	3068493	3115187	7453	ENST00000259808.9	ENSG00000137275.16	ENSG00000137275	6	3063824	3115187	978.232	0.360905	0.0900284	4.00879	6.10294e-05	0.00135326
DUSP16	-0.296854	0.730807	0.479067	chr12	12473281	12562863	3875	ENST00000298573.9	ENSG00000111266.9	ENSG00000111266	12	12473282	12562863	892.866	0.512395	0.151671	3.37832	0.000729297	0.00999331
DUSP16	-0.296854	0.730807	0.479067	chr12_KN538369v1_fix	442284	531866	60074	ENST00000626413.3	ENSG00000280962.3	ENSG00000280962	HG1362_PATCH	442285	531866	892.866	0.512395	0.151671	3.37832	0.000729297	0.00999331
ZNF473	-1.29951	1.26886	0.479516	chr19	50026004	50048776	8253	ENST00000270617.8	ENSG00000142528.16	ENSG00000142528	19	50025714	50053414	1009.66	0.584591	0.0996644	5.8656	4.47513e-09	3.01624e-07
POLR3A	-0.0683049	0.610047	0.480338	chr10	77975148	78029515	9126	ENST00000372371.8	ENSG00000148606.15	ENSG00000148606	10	77953148	78029522	3093.84	0.334228	0.118517	2.82008	0.00480116	0.0398655
MAGED1	0.206551	-0.68633	0.481787	chrX	51893622	51902354	14655	ENST00000326587.12	ENSG00000179222.18	ENSG00000179222	X	51803007	51902354	14968.5	-0.209404	0.0660016	-3.17272	0.0015102	0.0175875
TUBA8	-0.932262	1.08133	0.483673	chr22	18110808	18131732	15595	ENST00000330423.8	ENSG00000183785.16	ENSG00000183785	22	18110100	18146683	124.916	0.804249	0.160892	4.99869	5.77202e-07	2.34888e-05
RNPEPL1	0.07028	-0.615967	0.484158	chr2	240568483	240581372	8235	ENST00000270357.10	ENSG00000142327.13	ENSG00000142327	2	240565804	240581372	1391.42	-0.268276	0.0942162	-2.84744	0.00440718	0.0375707
CLTCL1	-1.24305	1.25093	0.484287	chr22	19179472	19291719	1109	ENST00000427926.6	ENSG00000070371.16	ENSG00000070371	22	19179473	19291719	868.068	0.55517	0.0960055	5.78269	7.35169e-09	4.63629e-07
DIS3L2	-0.280633	0.730957	0.484928	chr2	231961712	232337192	8587	ENST00000325385.12	ENSG00000144535.20	ENSG00000144535	2	231961245	232344350	647.842	0.276043	0.0816934	3.37901	0.000727464	0.00998087
VWA8	-0.11183	0.641058	0.486135	chr13	41566834	41961109	2703	ENST00000379310.8	ENSG00000102763.18	ENSG00000102763	13	41566835	41961120	617.332	0.433594	0.146315	2.96343	0.00304227	0.0289056
LIPA	0.0289189	-0.596649	0.486657	chr10	89213571	89251775	3454	ENST00000336233.10	ENSG00000107798.18	ENSG00000107798	10	89213569	89414557	2765.4	-0.201253	0.0729669	-2.75815	0.00581302	0.045591
DCAF17	-0.0461032	0.60932	0.489326	chr2	171434225	171485052	4495	ENST00000375255.8	ENSG00000115827.14	ENSG00000115827	2	171434217	171485052	679.717	0.436062	0.154812	2.81672	0.0048517	0.0400926
POLM	-1.26393	1.27574	0.489472	chr7	44072061	44082530	5299	ENST00000242248.10	ENSG00000122678.17	ENSG00000122678	7	44072062	44082530	919.486	0.500259	0.084827	5.89741	3.69262e-09	2.55264e-07
EPHA4	-1.46789	1.39091	0.490738	chr2	221418026	221572304	4536	ENST00000281821.7	ENSG00000116106.12	ENSG00000116106	2	221418027	221574202	510.348	0.890173	0.138445	6.42981	1.27767e-10	1.18779e-08
TSPAN9	0.0241153	-0.599988	0.491533	chr12	3077378	3286559	281	ENST00000011898.10	ENSG00000011105.14	ENSG00000011105	12	3077355	3286564	716.845	-0.27409	0.0988218	-2.77358	0.00554436	0.0440821
RUFY2	-0.592479	0.912518	0.491686	chr10	68343407	68407277	19766	ENST00000602465.6	ENSG00000204130.14	ENSG00000204130	10	68341107	68407294	345.788	0.635565	0.150668	4.21832	2.46128e-05	0.000624529
TYW1	-0.378982	0.795634	0.49196	chr7	66996832	67239514	17930	ENST00000359626.10	ENSG00000198874.14	ENSG00000198874	7	66995173	67239514	884.094	0.424509	0.115419	3.678	0.000235074	0.00404958
SERPINE2	0.0893788	-0.638217	0.493369	chr2	223975044	224039286	7179	ENST00000409304.6	ENSG00000135919.14	ENSG00000135919	2	223975045	224039318	1037.65	-0.271861	0.0921467	-2.9503	0.00317463	0.0296666
TTC21B	-0.12341	0.657092	0.49345	chr2	165873361	165953776	5417	ENST00000243344.8	ENSG00000123607.16	ENSG00000123607	2	165857475	165953851	464.999	0.439819	0.144794	3.03755	0.00238507	0.0243566
CEP72	-0.566442	0.902414	0.493987	chr5	612339	653553	4127	ENST00000264935.6	ENSG00000112877.8	ENSG00000112877	5	612340	667168	463.638	0.481738	0.11548	4.17161	3.02453e-05	0.000748086
CEP72	-0.566442	0.902414	0.493987	chr5_KI270793v1_alt	2317	14551	59920	ENST00000625371.1	ENSG00000280688.1	ENSG00000280688	HSCHR5_5_CTG1	2318	14551	463.638	0.481738	0.11548	4.17161	3.02453e-05	0.000748086
ZCCHC7	-0.0849977	0.637326	0.494552	chr9	37120573	37358149	9048	ENST00000336755.10	ENSG00000147905.18	ENSG00000147905	9	37120574	37358149	557.224	0.324657	0.110196	2.94618	0.00321723	0.0298726
ZNF239	-1.52133	1.43468	0.495733	chr10	43556343	43574616	17233	ENST00000374446.7	ENSG00000196793.14	ENSG00000196793	10	43556344	43574618	472.571	0.617634	0.0931276	6.63212	3.3089e-11	3.36633e-09
FOXC1	-1.58623	1.47067	0.495745	chr6	1609914	1613897	730	ENST00000645831.2	ENSG00000054598.9	ENSG00000054598	6	1609915	1613897	5674.6	0.675573	0.0993705	6.79852	1.05697e-11	1.19983e-09
PPM1D	-1.39643	1.36661	0.496146	chr17	60600192	60666280	12918	ENST00000305921.8	ENSG00000170836.13	ENSG00000170836	17	60600193	60666280	940.143	0.710691	0.112496	6.31748	2.65855e-10	2.34998e-08
HPRT1	0.136762	-0.668937	0.496778	chrX	134460164	134500668	11677	ENST00000298556.8	ENSG00000165704.15	ENSG00000165704	X	134460165	134520513	6961.69	-0.240271	0.0776995	-3.09231	0.00198604	0.0213747
ZNF44	-0.747993	1.00973	0.497474	chr19	12271807	12294883	17560	ENST00000355684.6	ENSG00000197857.16	ENSG00000197857	19	12224686	12294883	183.676	0.686524	0.14708	4.6677	3.04592e-06	0.000105279
SNHG17	-0.862117	1.07586	0.498715	chr20	38419637	38435381	17222	ENST00000654008.2	ENSG00000196756.15	ENSG00000196756	20	38419638	38435409	1972.44	0.735215	0.147829	4.97341	6.57867e-07	2.64718e-05
RPN2	0.346105	-0.78834	0.498783	chr20	37179329	37241619	4846	ENST00000237530.11	ENSG00000118705.18	ENSG00000118705	20	37178410	37241619	10006.5	-0.227095	0.0623154	-3.64428	0.00026814	0.00449941
RPN2	0.346105	-0.78834	0.498783	chr20_MU273389v1_fix	87891	151106	69732	ENST00000709408.1	ENSG00000291973.1	ENSG00000291973	HG410_PATCH	87883	151121	10006.5	-0.227095	0.0623154	-3.64428	0.00026814	0.00449941
SLC25A21-AS1	-0.35349	0.792552	0.498842	chr14	37171887	37173811	46234	ENST00000556667.1	ENSG00000258708.1	ENSG00000258708	14	37171888	37173811	164.017	0.53073	0.14486	3.66375	0.00024855	0.00422104
USP20	-0.100895	0.652199	0.49921	chr9	129835457	129881828	7368	ENST00000372429.8	ENSG00000136878.14	ENSG00000136878	9	129834698	129881828	855.12	0.26287	0.087189	3.01494	0.00257031	0.0255468
ZGPAT	-0.0626362	0.634389	0.502009	chr20	63708038	63736142	17328	ENST00000355969.11	ENSG00000197114.12	ENSG00000197114	20	63707465	63736142	880.062	0.252991	0.0862685	2.93261	0.0033613	0.0308234
PEX1	-0.334471	0.787702	0.502513	chr7	92487024	92528520	5978	ENST00000248633.9	ENSG00000127980.16	ENSG00000127980	7	92487020	92528520	718.527	0.521089	0.143104	3.64133	0.000271232	0.00451763
RIC8B	-1.06501	1.20418	0.505101	chr12	106774681	106889316	3957	ENST00000392837.9	ENSG00000111785.21	ENSG00000111785	12	106774621	106889316	557.05	0.575295	0.103348	5.56659	2.59777e-08	1.42474e-06
TONSL	-0.715353	1.00717	0.505294	chr8	144428774	144444440	10566	ENST00000409379.8	ENSG00000160949.18	ENSG00000160949	8	144428775	144444440	3367.89	0.424608	0.0911985	4.65586	3.22629e-06	0.000109755
P3H3	-0.131246	0.677357	0.505345	chr12	6828406	6839847	3817	ENST00000290510.10	ENSG00000110811.20	ENSG00000110811	12	6828407	6839847	1121.17	0.26881	0.085848	3.13123	0.00174074	0.0194731
KIAA0753	-1.01349	1.17584	0.505422	chr17	6578146	6640711	17957	ENST00000361413.8	ENSG00000198920.11	ENSG00000198920	17	6578147	6640711	655.761	0.549412	0.101077	5.43559	5.46144e-08	2.77812e-06
PRPS1	0.0507292	-0.633636	0.50675	chrX	107628509	107651026	8958	ENST00000372435.10	ENSG00000147224.13	ENSG00000147224	X	107628428	107651993	10418.7	-0.153441	0.0523844	-2.92913	0.00339917	0.0310425
TTC31	-0.251558	0.747433	0.506784	chr2	74483080	74494559	4406	ENST00000233623.11	ENSG00000115282.21	ENSG00000115282	2	74483073	74494559	1102.55	0.272703	0.0789258	3.45517	0.000549936	0.00805299
STX1A	-1.39901	1.39815	0.507066	chr7	73699209	73719669	3263	ENST00000222812.8	ENSG00000106089.12	ENSG00000106089	7	73699206	73719672	477.023	0.696858	0.107818	6.46327	1.02463e-10	9.60834e-09
ZRANB3	-0.175564	0.705562	0.507628	chr2	135196968	135531218	5227	ENST00000264159.11	ENSG00000121988.18	ENSG00000121988	2	135136916	135531218	243.381	0.388984	0.119261	3.26162	0.00110779	0.013792
NFXL1	-0.646993	0.973922	0.508091	chr4	47847239	47914583	12835	ENST00000507489.2	ENSG00000170448.12	ENSG00000170448	4	47847233	47914667	754.039	0.68059	0.151169	4.50217	6.72627e-06	0.000202783
VMA21	0.169472	-0.704167	0.509119	chrX	151397205	151409364	10436	ENST00000330374.7	ENSG00000160131.14	ENSG00000160131	X	151396515	151409364	4596.66	-0.217401	0.0667864	-3.25517	0.00113325	0.0139977
SDHC	0.230744	-0.73988	0.509702	chr1	161314380	161363206	8360	ENST00000367975.7	ENSG00000143252.16	ENSG00000143252	1	161314381	161363206	4396.63	-0.307346	0.0898604	-3.42026	0.000625613	0.00888882
LIMK1	0.272302	-0.764429	0.510286	chr7	74083803	74122525	3353	ENST00000336180.7	ENSG00000106683.15	ENSG00000106683	7	74082933	74122525	1462.26	-0.258788	0.0732335	-3.53374	0.00040972	0.00628509
FLOT2	0.0494328	-0.640076	0.512494	chr17	28879338	28897733	6621	ENST00000394908.9	ENSG00000132589.16	ENSG00000132589	17	28879335	28897733	3461.21	-0.239676	0.0810019	-2.9589	0.00308743	0.029206
KAT7	-0.63294	0.976639	0.513718	chr17	49788680	49835026	7293	ENST00000259021.9	ENSG00000136504.15	ENSG00000136504	17	49788624	49835026	2233.82	0.354426	0.0785044	4.51473	6.3397e-06	0.000194779
SETDB2	-0.863727	1.11193	0.515004	chr13	49444273	49495003	7239	ENST00000611815.2	ENSG00000136169.17	ENSG00000136169	13	49444274	49495003	220.935	0.610388	0.118749	5.14013	2.74542e-07	1.20352e-05
RUFY1	-0.082859	0.662453	0.515005	chr5	179550553	179610012	14160	ENST00000319449.9	ENSG00000176783.15	ENSG00000176783	5	179550554	179610012	1847.03	0.191133	0.062414	3.06234	0.00219615	0.0228124
RUFY1	-0.082859	0.662453	0.515005	chr5_KV575244v1_fix	315195	376273	62622	ENST00000639909.2	ENSG00000284260.2	ENSG00000284260	HG30_PATCH	315196	376273	1847.03	0.191133	0.062414	3.06234	0.00219615	0.0228124
DHCR7	0.233823	-0.750139	0.515548	chr11	71434410	71448393	13413	ENST00000355527.8	ENSG00000172893.18	ENSG00000172893	11	71428193	71452868	6615.59	-0.258369	0.0745077	-3.46769	0.000524955	0.00776423
CCND2	0.0688616	-0.655284	0.515704	chr12	4273761	4305353	4868	ENST00000261254.8	ENSG00000118971.9	ENSG00000118971	12	4269771	4305353	2984.75	-0.210227	0.0694004	-3.0292	0.00245204	0.0248132
ACVR2A	-0.99443	1.1903	0.516365	chr2	147845028	147930822	5228	ENST00000241416.12	ENSG00000121989.15	ENSG00000121989	2	147844517	147930826	658.599	0.441408	0.0802206	5.50243	3.74597e-08	1.95152e-06
PSAT1	-0.0559971	-0.594114	0.516714	chr9	78297124	78330093	7010	ENST00000376588.4	ENSG00000135069.14	ENSG00000135069	9	78297125	78330093	6919.29	-0.193801	0.0705647	-2.74643	0.00602485	0.0468773
SEPSECS	-0.42689	0.867188	0.519019	chr4	25120013	25160449	3687	ENST00000382103.7	ENSG00000109618.13	ENSG00000109618	4	25120014	25160550	247.5	0.546028	0.136208	4.00877	6.10356e-05	0.00135326
ZSCAN32	-0.997515	1.19983	0.519721	chr16	3382084	3401004	8058	ENST00000396852.9	ENSG00000140987.21	ENSG00000140987	16	3382081	3401065	697.687	0.465492	0.0839258	5.54647	2.91492e-08	1.57962e-06
EXO1	-0.483359	0.903093	0.520834	chr1	241848203	241889939	13693	ENST00000366548.8	ENSG00000174371.17	ENSG00000174371	1	241847967	241895148	3128.88	0.37036	0.0887144	4.17475	2.98314e-05	0.000741335
GNPDA2	0.0731055	0.593139	0.521703	chr4	44701794	44726556	10969	ENST00000295448.8	ENSG00000163281.12	ENSG00000163281	4	44682200	44726588	210.762	0.390315	0.142351	2.74192	0.00610813	0.0473074
BMP2	-1.11218	1.27301	0.522417	chr20	6767685	6780246	5740	ENST00000378827.5	ENSG00000125845.7	ENSG00000125845	20	6767686	6780246	1242.73	0.623956	0.106029	5.88475	3.9865e-09	2.7038e-07
BRSK2	-0.00850487	0.630189	0.523761	chr11	1389933	1462689	13747	ENST00000528841.6	ENSG00000174672.16	ENSG00000174672	11	1389899	1462689	729.056	0.33842	0.116168	2.91319	0.00357757	0.032258
BRSK2	-0.00850487	0.630189	0.523761	chr11_MU273369v1_fix	124164	196951	69223	ENST00000707533.1	ENSG00000291428.1	ENSG00000291428	HG152_PATCH	124165	196955	729.056	0.33842	0.116168	2.91319	0.00357757	0.032258
GNAI2	0.366469	-0.84254	0.525507	chr3	50236203	50259362	4284	ENST00000313601.11	ENSG00000114353.17	ENSG00000114353	3	50226292	50259362	3381.19	-0.252494	0.064828	-3.89483	9.8268e-05	0.00199942
DDX55	-0.796957	1.09697	0.526267	chr12	123602098	123620943	3895	ENST00000238146.9	ENSG00000111364.16	ENSG00000111364	12	123602077	123620943	1920.41	0.442338	0.0872289	5.071	3.95732e-07	1.68015e-05
CD55	0.0142729	-0.638611	0.527932	chr1	207321677	207360966	17078	ENST00000367064.9	ENSG00000196352.18	ENSG00000196352	1	207321519	207386804	1339.63	-0.228051	0.0772498	-2.95212	0.00315597	0.029602
NANOS1	0.396495	-0.865305	0.528641	chr10	119029713	119033730	16757	ENST00000425699.3	ENSG00000188613.7	ENSG00000188613	10	119029714	119033730	256.306	-0.642499	0.160622	-4.00007	6.33242e-05	0.00139365
BAIAP3	-0.426763	0.883313	0.528715	chr16	1333644	1349439	187	ENST00000426824.8	ENSG00000007516.15	ENSG00000007516	16	1333638	1349439	106.507	0.670812	0.164281	4.08332	4.43977e-05	0.00104538
EIF2S3	0.0203829	-0.643903	0.529318	chrX	24054955	24078810	6334	ENST00000253039.9	ENSG00000130741.11	ENSG00000130741	X	24054946	24078810	12791.3	-0.139116	0.0467369	-2.97658	0.00291478	0.0280402
OTUB1	0.0497845	-0.66319	0.530834	chr11	63986437	63998412	12201	ENST00000538426.6	ENSG00000167770.13	ENSG00000167770	11	63985853	64001811	8307	-0.311556	0.101625	-3.06574	0.00217129	0.0226672
TSPYL2	-0.0861395	0.684874	0.530922	chrX	53082366	53088540	15685	ENST00000375442.8	ENSG00000184205.14	ENSG00000184205	X	53082367	53088540	1723.44	0.295762	0.0934186	3.16598	0.0015456	0.017917
ITM2B	0.0370582	-0.656413	0.53146	chr13	48233205	48270357	7233	ENST00000647800.2	ENSG00000136156.15	ENSG00000136156	13	48232612	48270357	3272.76	-0.290714	0.0958055	-3.03442	0.00240999	0.0245879
TRAF6	-1.5329	1.54922	0.53293	chr11	36483768	36510272	13832	ENST00000526995.6	ENSG00000175104.15	ENSG00000175104	11	36483769	36510272	768.848	0.682859	0.0953499	7.16161	7.97324e-13	1.0884e-10
NT5DC3	-0.932384	1.1917	0.53301	chr12	103772309	103841234	3937	ENST00000392876.8	ENSG00000111696.12	ENSG00000111696	12	103770453	103841234	1223.11	0.395844	0.0718551	5.50892	3.61038e-08	1.91302e-06
ARF4	0.0377696	-0.659024	0.533231	chr3	57571362	57597344	12351	ENST00000303436.11	ENSG00000168374.11	ENSG00000168374	3	57571363	57598220	5895.33	-0.192597	0.0632193	-3.04649	0.00231533	0.0237569
WDR62	-0.665636	1.03395	0.533609	chr19	36054896	36105108	1321	ENST00000401500.7	ENSG00000075702.19	ENSG00000075702	19	36054649	36105108	2591.16	0.323848	0.0677551	4.77968	1.75573e-06	6.47772e-05
ABCA3	0.155669	-0.732451	0.535542	chr16	2275880	2340728	12250	ENST00000301732.10	ENSG00000167972.14	ENSG00000167972	16	2275881	2340746	754.673	-0.354053	0.104566	-3.38592	0.000709406	0.00985854
UHRF2	-1.2141	1.36807	0.536355	chr9	6413198	6507054	9037	ENST00000276893.10	ENSG00000147854.17	ENSG00000147854	9	6413151	6507054	1186.76	0.636998	0.100724	6.32419	2.54559e-10	2.26873e-08
ZNF212	-1.17823	1.35144	0.538297	chr7	149239650	149255606	12783	ENST00000335870.7	ENSG00000170260.9	ENSG00000170260	7	149239651	149255606	1092.06	0.458808	0.0734405	6.24734	4.17506e-10	3.54698e-08
PIK3IP1	-0.481831	0.932798	0.538497	chr22	31281599	31292488	2192	ENST00000215912.10	ENSG00000100100.13	ENSG00000100100	22	31281594	31292534	109.722	0.809764	0.18779	4.31207	1.61733e-05	0.000433863
TLE1	-0.180724	0.75187	0.53871	chr9	81583682	81689547	17229	ENST00000376499.8	ENSG00000196781.16	ENSG00000196781	9	81583683	81689547	2200.47	0.242275	0.0697058	3.47569	0.000509548	0.00760022
NEMF	-0.188947	0.758041	0.539579	chr14	49782082	49852788	11629	ENST00000298310.10	ENSG00000165525.18	ENSG00000165525	14	49782083	49852821	908.417	0.365952	0.104432	3.50422	0.000457955	0.00690983
PTBP2	-0.936352	1.20881	0.539588	chr1	96721783	96815049	4736	ENST00000674951.1	ENSG00000117569.20	ENSG00000117569	1	96721665	96823738	1325.58	0.494374	0.088471	5.58797	2.29734e-08	1.27704e-06
MTURN	-0.13525	-0.590732	0.540776	chr7	30134985	30162762	14861	ENST00000324453.13	ENSG00000180354.16	ENSG00000180354	7	30134986	30162762	1201.21	-0.225677	0.0826417	-2.73079	0.00631825	0.0484954
CNKSR3	-0.691115	1.0633	0.540808	chr6	154387514	154510685	9685	ENST00000607772.6	ENSG00000153721.19	ENSG00000153721	6	154387515	154510685	628.66	0.502211	0.102172	4.91536	8.8619e-07	3.51348e-05
DUS3L	0.0861428	0.610706	0.540844	chr19	5785139	5791163	8201	ENST00000309061.12	ENSG00000141994.16	ENSG00000141994	19	5784832	5791225	2667.19	0.213572	0.075651	2.82312	0.00475581	0.0396649
FAM3C	-0.102338	-0.604693	0.541303	chr7	121348877	121396308	17272	ENST00000359943.8	ENSG00000196937.11	ENSG00000196937	7	121348878	121396364	544.1	-0.341875	0.122302	-2.79533	0.00518468	0.0419859
ADIPOR1	-0.0437501	-0.628496	0.541361	chr1	202940831	202958312	10350	ENST00000340990.10	ENSG00000159346.13	ENSG00000159346	1	202940826	202958572	4389.72	-0.195714	0.0673629	-2.90536	0.00366828	0.0328016
SNAPC4	-1.4055	1.50173	0.543202	chr9	136375570	136400170	11668	ENST00000684778.1	ENSG00000165684.6	ENSG00000165684	9	136375567	136400176	2247.73	0.674824	0.0972075	6.9421	3.86315e-12	4.84422e-10
YBX3	0.122758	-0.72346	0.543588	chr12	10699088	10723323	810	ENST00000228251.9	ENSG00000060138.13	ENSG00000060138	12	10699089	10723323	13370.4	-0.257154	0.0768919	-3.34436	0.000824739	0.0109079
METTL14	-1.05244	1.28957	0.544128	chr4	118685391	118715430	8707	ENST00000388822.10	ENSG00000145388.15	ENSG00000145388	4	118685392	118715433	645.148	0.532136	0.0892645	5.96134	2.50171e-09	1.78665e-07
OLIG2	-0.648673	1.04513	0.544709	chr21	33025934	33029185	20336	ENST00000382357.4	ENSG00000205927.5	ENSG00000205927	21	33025935	33029196	225.706	0.80921	0.167491	4.83137	1.35598e-06	5.1671e-05
ARC	-1.06463	1.29864	0.544821	chr8	142611048	142614479	17793	ENST00000356613.4	ENSG00000198576.4	ENSG00000198576	8	142611049	142614479	173.593	0.985439	0.164151	6.00326	1.93398e-09	1.39974e-07
DTL	-0.394263	0.89155	0.545506	chr1	212035747	212105013	8417	ENST00000366991.5	ENSG00000143476.18	ENSG00000143476	1	212035553	212107400	2720.89	0.37983	0.0921605	4.12139	3.76592e-05	0.000901253
PTPN3	-0.305038	0.837469	0.545714	chr9	109375699	109498307	1101	ENST00000374541.4	ENSG00000070159.14	ENSG00000070159	9	109375466	109498313	445.059	0.401784	0.103783	3.87139	0.000108218	0.00216225
RBL1	0.155531	0.588935	0.546154	chr20	36996348	37095997	1512	ENST00000373664.8	ENSG00000080839.12	ENSG00000080839	20	36996349	37095997	566.198	0.333468	0.122486	2.72249	0.00647926	0.0494147
BLM	-0.840654	1.16549	0.54634	chr15	90717345	90816166	17386	ENST00000355112.8	ENSG00000197299.13	ENSG00000197299	15	90717346	90816166	1680.52	0.442595	0.0821482	5.38776	7.13423e-08	3.56183e-06
ZBTB2	-0.425013	0.912762	0.546983	chr6	151364114	151391559	15061	ENST00000325144.5	ENSG00000181472.5	ENSG00000181472	6	151364115	151391559	1168.86	0.523189	0.123995	4.21945	2.449e-05	0.000622877
FJX1	0.153001	-0.746876	0.547282	chr11	35618459	35620865	14693	ENST00000317811.6	ENSG00000179431.7	ENSG00000179431	11	35618460	35620865	941.257	-0.421946	0.122211	-3.4526	0.000555209	0.00808013
UBR2	-0.306465	0.841878	0.548018	chr6	42564028	42693505	439	ENST00000372901.2	ENSG00000024048.11	ENSG00000024048	6	42564029	42693505	1165.01	0.50241	0.129095	3.89177	9.95158e-05	0.00201725
LPCAT1	-0.0474254	-0.636463	0.549282	chr5	1461426	1523960	9666	ENST00000283415.4	ENSG00000153395.10	ENSG00000153395	5	1456480	1523962	2687.06	-0.173272	0.0588923	-2.94219	0.00325898	0.0300898
LPCAT1	-0.0474254	-0.636463	0.549282	chr5_KI270791v1_alt	35088	46122	55604	ENST00000626646.1	ENSG00000275079.3	ENSG00000275079	HSCHR5_3_CTG1	8170	53293	2687.06	-0.173272	0.0588923	-2.94219	0.00325898	0.0300898
EGFL7	-0.166934	-0.588083	0.549309	chr9	136662915	136672678	13411	ENST00000308874.12	ENSG00000172889.16	ENSG00000172889	9	136658856	136672678	1039.14	-0.325709	0.11981	-2.71854	0.00655698	0.0496633
PIDD1	-0.304736	0.843408	0.549705	chr11	799183	805231	14339	ENST00000347755.10	ENSG00000177595.19	ENSG00000177595	11	799179	809753	925.307	0.358956	0.0920672	3.89885	9.66525e-05	0.0019778
SESN1	0.0734227	0.627549	0.550638	chr6	108984308	109094846	1497	ENST00000436639.7	ENSG00000080546.14	ENSG00000080546	6	108984309	109094846	879.125	0.254217	0.0876312	2.90099	0.00371989	0.0331021
PTPN4	-0.481025	0.955128	0.551674	chr2	119759921	119984899	1763	ENST00000263708.7	ENSG00000088179.9	ENSG00000088179	2	119759922	119984899	450.438	0.546277	0.123724	4.4153	1.00872e-05	0.000287779
ZNF274	-1.07828	1.32484	0.552279	chr19	58183060	58213562	13113	ENST00000617501.5	ENSG00000171606.18	ENSG00000171606	19	58183029	58213562	617.303	0.623259	0.101767	6.12439	9.10311e-10	6.86489e-08
SYNGR1	-0.162215	-0.594869	0.553393	chr22	39349990	39385575	2268	ENST00000328933.10	ENSG00000100321.15	ENSG00000100321	22	39349925	39385575	2307.99	-0.337035	0.122562	-2.74992	0.00596103	0.0464784
ESCO1	-1.09672	1.34799	0.557141	chr18	21529283	21600704	8121	ENST00000269214.10	ENSG00000141446.11	ENSG00000141446	18	21529284	21600884	826.559	0.565069	0.0906812	6.23138	4.62337e-10	3.77715e-08
PROCR	-0.194291	-0.59027	0.560426	chr20	35172071	35177362	2427	ENST00000216968.5	ENSG00000101000.6	ENSG00000101000	20	35172072	35216240	455.864	-0.345838	0.126743	-2.72866	0.00635929	0.0487064
CCT6P1	-1.30518	1.48749	0.560794	chr7	65751141	65763336	28721	ENST00000434500.6	ENSG00000228409.9	ENSG00000228409	7	65751142	65763336	375.52	0.830887	0.120835	6.87624	6.14542e-12	7.28266e-10
RAD54B	-0.394002	0.916402	0.560812	chr8	94371959	94475115	17381	ENST00000336148.10	ENSG00000197275.14	ENSG00000197275	8	94371960	94475115	580.003	0.364865	0.0861288	4.23627	2.2726e-05	0.000583517
RABGGTB	0.0723425	0.640634	0.561233	chr1	75786255	75795086	7584	ENST00000319942.8	ENSG00000137955.16	ENSG00000137955	1	75786197	75795086	3864.78	0.432325	0.145983	2.96147	0.0030617	0.0290135
C19orf73	-0.223678	0.810766	0.561591	chr19	49118401	49119143	24270	ENST00000408991.4	ENSG00000221916.4	ENSG00000221916	19	49118402	49119143	107.51	0.76027	0.20285	3.74795	0.000178288	0.00325745
ZNF30	-0.48521	0.975302	0.561808	chr19	34926902	34945168	12421	ENST00000601142.2	ENSG00000168661.15	ENSG00000168661	19	34926903	34945170	271.843	0.633954	0.140612	4.50855	6.52719e-06	0.000199403
KIAA1328	0.109158	0.626971	0.56228	chr18	36829126	37225334	9315	ENST00000280020.10	ENSG00000150477.15	ENSG00000150477	18	36829106	37232172	238.389	0.368125	0.127013	2.89831	0.00375177	0.0333545
SPINT2	-0.122406	-0.623549	0.56391	chr19	38264572	38292615	12157	ENST00000301244.12	ENSG00000167642.13	ENSG00000167642	19	38244035	38292615	1259.56	-0.291119	0.100995	-2.8825	0.00394537	0.034423
PLK3	-0.361837	0.901565	0.564144	chr1	44800376	44805990	13605	ENST00000372201.5	ENSG00000173846.13	ENSG00000173846	1	44800377	44805990	145.355	0.678266	0.162744	4.16769	3.07704e-05	0.000759331
GOT2	-0.119941	-0.624895	0.564201	chr16	58707130	58734316	5622	ENST00000245206.10	ENSG00000125166.13	ENSG00000125166	16	58707131	58734342	12329.9	-0.183888	0.0636575	-2.88872	0.00386815	0.0339975
CCDC88C	-0.114221	0.746084	0.564635	chr14	91271322	91417820	355	ENST00000389857.11	ENSG00000015133.20	ENSG00000015133	14	91271323	91417844	504.813	0.584928	0.169597	3.44894	0.000562788	0.00815741
UVRAG	-0.544328	1.01901	0.565463	chr11	75815209	76144232	17732	ENST00000356136.8	ENSG00000198382.9	ENSG00000198382	11	75815210	76144232	780.152	0.389876	0.0827656	4.7106	2.46986e-06	8.7615e-05
FAM185A	-0.165301	0.785397	0.569769	chr7	102748998	102809225	24308	ENST00000413034.3	ENSG00000222011.9	ENSG00000222011	7	102748971	102809225	197.498	0.488441	0.134532	3.63067	0.000282684	0.00466562
GNG4	-0.177588	-0.610456	0.571668	chr1	235547684	235649784	12317	ENST00000391854.7	ENSG00000168243.11	ENSG00000168243	1	235547685	235650754	1179.34	-0.298096	0.105634	-2.82197	0.00477294	0.0397156
GPATCH1	-0.770154	1.17843	0.573592	chr19	33081180	33130542	1352	ENST00000170564.7	ENSG00000076650.7	ENSG00000076650	19	33080899	33130542	453.091	0.662405	0.121596	5.44757	5.10613e-08	2.62212e-06
C2CD3	0.0392602	0.669728	0.574379	chr11	74012717	74171002	12268	ENST00000334126.12	ENSG00000168014.18	ENSG00000168014	11	74012718	74171210	769.011	0.456891	0.147576	3.09597	0.00196171	0.0211763
KIF15	-0.00949664	0.693015	0.575447	chr3	44761793	44853256	11146	ENST00000326047.9	ENSG00000163808.17	ENSG00000163808	3	44761721	44873376	785.815	0.410551	0.128152	3.20362	0.00135713	0.0162434
KIF15	-0.00949664	0.693015	0.575447	chr3_KN196475v1_fix	287143	378606	59872	ENST00000627272.3	ENSG00000280610.3	ENSG00000280610	HG2066_PATCH	287071	398726	785.815	0.410551	0.128152	3.20362	0.00135713	0.0162434
RNH1	-0.102246	-0.645564	0.57551	chr11	494514	507242	424	ENST00000354420.7	ENSG00000023191.17	ENSG00000023191	11	494512	507300	5208.05	-0.229411	0.0768737	-2.98426	0.00284262	0.0274685
RNH1	-0.102246	-0.645564	0.57551	chr11_KI270832v1_alt	24201	36941	56502	ENST00000617351.4	ENSG00000276230.4	ENSG00000276230	HSCHR11_1_CTG8	24153	36941	5208.05	-0.229411	0.0768737	-2.98426	0.00284262	0.0274685
TBC1D2	-0.121535	0.767679	0.577406	chr9	98199010	98255649	2028	ENST00000465784.7	ENSG00000095383.20	ENSG00000095383	9	98199011	98255649	121.337	0.594995	0.167662	3.54877	0.000387034	0.00600544
RLF	-0.812645	1.21578	0.578399	chr1	40161386	40240921	4662	ENST00000372771.5	ENSG00000117000.9	ENSG00000117000	1	40161387	40240921	1059.99	0.816232	0.145232	5.62021	1.90728e-08	1.08253e-06
TMEM260	-0.0878006	0.747209	0.578413	chr14	56579797	56649515	1106	ENST00000261556.11	ENSG00000070269.14	ENSG00000070269	14	56488354	56650606	372.068	0.336701	0.0974774	3.45414	0.00055205	0.00805299
CLDND1	0.16058	-0.794598	0.578659	chr3	98515482	98522902	1509	ENST00000341181.11	ENSG00000080822.17	ENSG00000080822	3	98497912	98523066	1455.62	-0.359808	0.0979547	-3.67321	0.000239525	0.00410658
TPCN2	-0.527489	1.03411	0.579901	chr11	69048931	69090597	10714	ENST00000294309.8	ENSG00000162341.18	ENSG00000162341	11	69048932	69136316	1161.65	0.341356	0.071407	4.78042	1.74927e-06	6.47772e-05
COPE	-0.231558	-0.599146	0.580509	chr19	18899513	18919387	3165	ENST00000262812.9	ENSG00000105669.14	ENSG00000105669	19	18899514	18919387	9518.92	-0.31327	0.113107	-2.76969	0.00561098	0.0444918
SEPHS1	-0.185361	-0.618609	0.581136	chr10	13317427	13348293	1695	ENST00000327347.10	ENSG00000086475.15	ENSG00000086475	10	13317428	13348298	4011.48	-0.217405	0.0760247	-2.85966	0.00424095	0.0365875
RTN4	-0.27108	-0.588066	0.584639	chr2	54972188	55050451	4414	ENST00000337526.11	ENSG00000115310.19	ENSG00000115310	2	54972187	55112621	4315.23	-0.191466	0.0704315	-2.71847	0.00655851	0.0496633
VAMP2	-0.223266	-0.60886	0.585832	chr17	8159148	8162948	23946	ENST00000316509.11	ENSG00000220205.10	ENSG00000220205	17	8159149	8163546	1869.51	-0.339608	0.12066	-2.81459	0.00488394	0.0402664
IWS1	0.045487	0.680957	0.585898	chr2	127480811	127526489	10946	ENST00000295321.9	ENSG00000163166.15	ENSG00000163166	2	127436207	127526886	2414.07	0.304191	0.0966337	3.14787	0.00164462	0.0186578
TUBB6	-0.0258587	-0.689903	0.586732	chr18	12308240	12326616	14002	ENST00000317702.10	ENSG00000176014.13	ENSG00000176014	18	12307669	12344320	2815.9	-0.255073	0.0799794	-3.18923	0.00142652	0.0168865
ARAF	-0.225743	-0.611323	0.588736	chrX	47561204	47571908	1407	ENST00000377045.9	ENSG00000078061.14	ENSG00000078061	X	47561205	47571908	3130.47	-0.191658	0.06782	-2.82598	0.00471368	0.0394355
CMBL	-0.207505	-0.619557	0.589445	chr5	10277594	10307902	11303	ENST00000296658.4	ENSG00000164237.9	ENSG00000164237	5	10275875	10307902	817.902	-0.232881	0.0813122	-2.86404	0.00418274	0.0362303
ZNF8	-1.40074	1.62669	0.589533	chr19	58278954	58302791	57925	ENST00000621650.2	ENSG00000278129.2	ENSG00000278129	19	58278955	58302791	241.387	1.25716	0.167182	7.51972	5.48927e-14	8.96914e-12
ATP6V0E1	-0.163845	-0.63862	0.590598	chr5	172983770	173035445	4229	ENST00000519374.6	ENSG00000113732.9	ENSG00000113732	5	172983771	173035445	3665.01	-0.353466	0.119731	-2.95217	0.00315553	0.029602
SERINC2	0.0796683	-0.758828	0.59157	chr1	31413212	31434678	12395	ENST00000373709.8	ENSG00000168528.12	ENSG00000168528	1	31409565	31434680	893.712	-0.363472	0.103617	-3.50785	0.000451736	0.00685165
DMTN	-0.020625	-0.700042	0.59345	chr8	22056813	22082525	10284	ENST00000358242.6	ENSG00000158856.19	ENSG00000158856	8	22048995	22082527	175.341	-0.457155	0.141267	-3.2361	0.00121174	0.0147822
RAB1B	-0.262193	-0.603496	0.594549	chr11	66268638	66277492	13789	ENST00000311481.11	ENSG00000174903.16	ENSG00000174903	11	66268590	66277492	8047.02	-0.27427	0.0983117	-2.7898	0.00527411	0.042487
PHF21B	-0.629911	1.1294	0.595128	chr22	44881161	45010005	762	ENST00000313237.10	ENSG00000056487.16	ENSG00000056487	22	44881162	45010005	174.663	0.754441	0.144504	5.22088	1.78071e-07	8.06858e-06
CAPZB	-0.272618	-0.600618	0.595675	chr1	19338774	19485539	1392	ENST00000264202.8	ENSG00000077549.19	ENSG00000077549	1	19338775	19485539	5981.31	-0.24747	0.0891306	-2.77649	0.00549492	0.0437645
CDK11A	-0.406906	0.98322	0.596439	chr1	1702378	1724357	203	ENST00000404249.8	ENSG00000008128.23	ENSG00000008128	1	1702379	1724357	384.907	0.56358	0.123996	4.54516	5.48943e-06	0.000170599
RPP14	-0.804615	1.24902	0.596763	chr3	58306244	58320193	11107	ENST00000295959.10	ENSG00000163684.12	ENSG00000163684	3	58306245	58324695	1649.59	0.519849	0.0900344	5.77389	7.74602e-09	4.80075e-07
DDX31	-0.635904	1.13715	0.597105	chr9	132592996	132669983	5665	ENST00000372159.8	ENSG00000125485.18	ENSG00000125485	9	132592997	132670401	1008.69	0.514662	0.0979056	5.25671	1.46652e-07	6.81678e-06
TADA2A	0.204987	0.630061	0.59739	chr17	37406885	37479725	56506	ENST00000615182.5	ENSG00000276234.5	ENSG00000276234	17	37406886	37479725	415.706	0.438678	0.150614	2.9126	0.00358434	0.032292
TADA2A	0.204987	0.630061	0.59739	chr17_KI270857v1_alt	1646029	1718900	57157	ENST00000633468.1	ENSG00000277104.4	ENSG00000277104	HSCHR17_7_CTG4	1646030	1718900	415.706	0.438678	0.150614	2.9126	0.00358434	0.032292
PRDM6	-0.939558	1.34153	0.597878	chr5	123089240	123194266	829	ENST00000407847.5	ENSG00000061455.11	ENSG00000061455	5	123089241	123194266	257.309	0.738962	0.119158	6.20152	5.5919e-10	4.40169e-08
WDHD1	0.0509946	0.693137	0.597971	chr14	54938948	55027099	17784	ENST00000360586.8	ENSG00000198554.12	ENSG00000198554	14	54938949	55027105	1087.17	0.380108	0.118629	3.20418	0.00135448	0.0162297
MKNK2	0.0259728	-0.731727	0.59844	chr19	2037470	2051244	2133	ENST00000250896.9	ENSG00000099875.16	ENSG00000099875	19	2037465	2051244	2967.87	-0.257284	0.0760618	-3.38257	0.000718109	0.00992832
MED25	-0.0676564	-0.687726	0.599093	chr19	49818288	49836979	3022	ENST00000312865.10	ENSG00000104973.19	ENSG00000104973	19	49818282	49840383	2623.7	-0.225903	0.0710571	-3.17917	0.00147698	0.0173316
SFMBT2	-0.795389	1.25038	0.600371	chr10	7158623	7411034	17932	ENST00000397167.6	ENSG00000198879.13	ENSG00000198879	10	7158624	7411488	663.661	0.969861	0.167791	5.78018	7.46191e-09	4.67844e-07
CTDSP1	-0.142493	-0.660329	0.601538	chr2	218399867	218405941	8594	ENST00000273062.7	ENSG00000144579.9	ENSG00000144579	2	218397136	218405941	2076.98	-0.232019	0.076009	-3.05252	0.0022693	0.023396
PMS2P3	-1.43703	1.69007	0.603633	chr7	75510930	75516235	5977	ENST00000529061.7	ENSG00000127957.21	ENSG00000127957	7	75510931	75516235	175.78	1.40274	0.179545	7.81273	5.59637e-15	1.09329e-12
PMS2P3	-1.43703	1.69007	0.603633	chr7	75507752	75528123	68919	ENST00000418756.5	ENSG00000291092.1	ENSG00000291092	7	75507747	75528148	175.78	1.40274	0.179545	7.81273	5.59637e-15	1.09329e-12
MMGT1	-0.273238	-0.610487	0.604154	chrX	135960587	135973988	12613	ENST00000305963.3	ENSG00000169446.6	ENSG00000169446	X	135960588	135974029	3596.24	-0.18671	0.0661596	-2.82211	0.00477086	0.0397156
NEIL3	-0.570742	1.11012	0.60609	chr4	177309873	177362936	3692	ENST00000264596.4	ENSG00000109674.4	ENSG00000109674	4	177309874	177362936	841.836	0.45339	0.0883498	5.13176	2.87049e-07	1.2482e-05
ZNF35	-0.355461	0.96705	0.607831	chr3	44648731	44660791	12732	ENST00000396056.7	ENSG00000169981.11	ENSG00000169981	3	44648732	44660791	456.662	0.514384	0.115064	4.47041	7.80707e-06	0.000227544
ZNF35	-0.355461	0.96705	0.607831	chr3_KN196475v1_fix	174085	186145	60256	ENST00000625394.3	ENSG00000281306.3	ENSG00000281306	HG2066_PATCH	174086	186145	456.662	0.514384	0.115064	4.47041	7.80707e-06	0.000227544
XPC	-0.0602052	0.767929	0.608992	chr3	14145146	14178601	9815	ENST00000285021.12	ENSG00000154767.15	ENSG00000154767	3	14145147	14178621	1410.01	0.280017	0.0788795	3.54993	0.000385339	0.00598775
TMA7	-0.0540075	-0.708266	0.611668	chr3	48440256	48444208	31587	ENST00000438607.2	ENSG00000232112.3	ENSG00000232112	3	48440257	48444208	471.686	-0.484067	0.147847	-3.27412	0.00105993	0.013322
YWHAQ	0.120273	-0.812869	0.612045	chr2	9583966	9630997	6883	ENST00000238081.8	ENSG00000134308.14	ENSG00000134308	2	9583967	9630997	12631.4	-0.211148	0.0561911	-3.75767	0.000171502	0.00316691
CTC1	-0.399413	1.00403	0.612172	chr17	8224814	8248056	14593	ENST00000651323.1	ENSG00000178971.17	ENSG00000178971	17	8224815	8248058	533.641	0.451325	0.0972398	4.64136	3.46131e-06	0.000115563
B2M	-0.304933	-0.607597	0.612489	chr15	44711516	44718145	11926	ENST00000648006.3	ENSG00000166710.23	ENSG00000166710	15	44711358	44718851	6380.4	-0.286773	0.1021	-2.80875	0.00497338	0.0407855
B2M	-0.304933	-0.607597	0.612489	chr15_KI270849v1_alt	34825	42225	54547	ENST00000617605.4	ENSG00000273686.4	ENSG00000273686	HSCHR15_3_CTG8	34826	42225	6380.4	-0.286773	0.1021	-2.80875	0.00497338	0.0407855
SH3GL1	-0.351828	-0.588989	0.612815	chr19	4360369	4400547	8200	ENST00000269886.7	ENSG00000141985.9	ENSG00000141985	19	4360370	4400547	7422.76	-0.210615	0.0773544	-2.72273	0.00647442	0.0494127
SPNS1	-0.0868085	-0.696514	0.612954	chr16	28974777	28984543	12657	ENST00000311008.16	ENSG00000169682.18	ENSG00000169682	16	28974221	28984548	3480.01	-0.219438	0.0681529	-3.21979	0.00128284	0.0154975
NCS1	-0.342844	-0.593809	0.613804	chr9	130172403	130237303	3393	ENST00000372398.6	ENSG00000107130.10	ENSG00000107130	9	130172404	130237303	2158.63	-0.220426	0.0803004	-2.74502	0.00605079	0.0469716
PAK4	-0.268472	-0.624489	0.614266	chr19	39125785	39179404	6312	ENST00000360442.8	ENSG00000130669.17	ENSG00000130669	19	39125770	39182816	2866.81	-0.181598	0.0629054	-2.88684	0.00389131	0.034117
RPN1	0.187755	-0.863759	0.615413	chr3	128619968	128650818	11178	ENST00000296255.8	ENSG00000163902.12	ENSG00000163902	3	128619969	128681075	10985.4	-0.216388	0.054193	-3.99292	6.5264e-05	0.0014305
VCPKMT	-1.34288	1.65956	0.615885	chr14	50108636	50116572	2327	ENST00000395860.7	ENSG00000100483.14	ENSG00000100483	14	50108632	50116600	394.444	0.923423	0.120367	7.67171	1.6972e-14	3.00043e-12
BUD13	-0.512838	1.09204	0.618058	chr11	116748172	116772987	7516	ENST00000260210.5	ENSG00000137656.12	ENSG00000137656	11	116748170	116772987	852.863	0.497324	0.0985154	5.04819	4.46022e-07	1.87156e-05
P4HB	-0.28814	-0.621482	0.618422	chr17	81843165	81860535	16031	ENST00000331483.9	ENSG00000185624.16	ENSG00000185624	17	81843159	81860856	18942	-0.201942	0.070291	-2.87294	0.00406672	0.0353388
ING3	0.0397534	0.722606	0.618844	chr7	120950776	120977216	1152	ENST00000315870.10	ENSG00000071243.16	ENSG00000071243	7	120950763	120977216	1292.69	0.282982	0.0847147	3.34041	0.000836556	0.0110286
PGM1	-0.184545	-0.66467	0.619445	chr1	63593410	63660245	1475	ENST00000371084.8	ENSG00000079739.17	ENSG00000079739	1	63593411	63660245	2077.62	-0.229313	0.0746318	-3.07259	0.00212213	0.0222617
AGPAT3	-0.173846	-0.669543	0.619897	chr21	43865222	43987592	10461	ENST00000291572.13	ENSG00000160216.21	ENSG00000160216	21	43865223	43987592	1902.17	-0.204968	0.0662231	-3.09511	0.00196739	0.0211952
RFWD3	0.0830256	0.706606	0.620125	chr16	74621398	74666877	12364	ENST00000361070.9	ENSG00000168411.14	ENSG00000168411	16	74621399	74666877	3530.28	0.344344	0.105419	3.26644	0.00108907	0.0136248
BRAP	-0.482245	1.07454	0.620156	chr12	111642145	111685956	1832	ENST00000419234.9	ENSG00000089234.16	ENSG00000089234	12	111642146	111685956	1117.98	0.359583	0.0723901	4.9673	6.78928e-07	2.72177e-05
CLASRP	-0.597597	1.15508	0.620474	chr19	45039044	45070956	2984	ENST00000221455.8	ENSG00000104859.15	ENSG00000104859	19	45039045	45070956	2113.59	0.438593	0.082139	5.33964	9.31318e-08	4.48363e-06
GPC4	-0.243799	-0.642398	0.620896	chrX	133300102	133415489	1356	ENST00000370828.4	ENSG00000076716.9	ENSG00000076716	X	133300103	133415489	1322.02	-0.205435	0.0691787	-2.96963	0.00298161	0.0285811
DHX35	-0.0566596	0.781084	0.621377	chr20	38962343	39039721	2541	ENST00000252011.8	ENSG00000101452.15	ENSG00000101452	20	38962299	39039723	577.39	0.399563	0.11066	3.61074	0.000305329	0.00496631
FAM222A	-0.223398	-0.651668	0.621739	chr12	109713824	109770495	7839	ENST00000538780.2	ENSG00000139438.6	ENSG00000139438	12	109713825	109770495	598.037	-0.319782	0.106152	-3.01248	0.00259121	0.0256599
SCAMP5	-0.21603	-0.65485	0.621904	chr15	74995562	75021495	17881	ENST00000425597.8	ENSG00000198794.12	ENSG00000198794	15	74957219	75021495	940.979	-0.274199	0.0905787	-3.02719	0.00246837	0.0249008
SNHG15	-0.30331	0.953195	0.621907	chr7	44983037	44986961	32238	ENST00000580528.2	ENSG00000232956.10	ENSG00000232956	7	44983019	44986961	3319.21	0.672877	0.152706	4.40636	1.05122e-05	0.00029701
HNRNPA1L2	0.281982	0.628226	0.621982	chr13	52642430	52643773	7876	ENST00000357495.5	ENSG00000139675.13	ENSG00000139675	13	52642431	52643773	328.434	0.429847	0.148013	2.90412	0.00368291	0.0328507
RND2	-0.361929	-0.59624	0.622317	chr17	43025230	43032041	3601	ENST00000587250.4	ENSG00000108830.11	ENSG00000108830	17	43025231	43032041	1278.9	-0.314258	0.114016	-2.75625	0.00584677	0.0457891
LDOC1	-0.370383	-0.596147	0.625108	chrX	141173234	141177129	15200	ENST00000370526.5	ENSG00000182195.9	ENSG00000182195	X	141111605	141177129	2696.16	-0.349121	0.126685	-2.75582	0.00585445	0.0457986
TBC1D12	0.117329	0.698922	0.625329	chr10	94402540	94536332	3504	ENST00000225235.5	ENSG00000108239.9	ENSG00000108239	10	94402541	94536332	430.018	0.485003	0.150113	3.23092	0.00123391	0.0149847
ZNF783	-0.357305	0.998246	0.626627	chr7	149262195	149284988	20079	ENST00000434415.6	ENSG00000204946.10	ENSG00000204946	7	149262171	149297302	1574	0.401968	0.0871075	4.61462	3.93822e-06	0.000129481
PRKACA	-0.304764	-0.627769	0.62933	chr19	14091687	14117762	1174	ENST00000308677.9	ENSG00000072062.16	ENSG00000072062	19	14091688	14118084	3968	-0.241245	0.0831305	-2.902	0.00370785	0.0330458
PRKACA	-0.304764	-0.627769	0.62933	chr19_ML143376v1_fix	303846	329921	66661	ENST00000673550.1	ENSG00000288516.1	ENSG00000288516	HG109_PATCH	303847	330243	3968	-0.241245	0.0831305	-2.902	0.00370785	0.0330458
AGPAT1	-0.339195	-0.616039	0.631188	chr6	32168211	32176084	19830	ENST00000375107.8	ENSG00000204310.13	ENSG00000204310	6	32168212	32178096	6141.38	-0.255848	0.0898412	-2.84778	0.00440258	0.0375613
AGPAT1	-0.339195	-0.616039	0.631188	chr6_GL000250v2_alt	3500813	3510698	35289	ENST00000430777.2	ENSG00000236873.9	ENSG00000236873	HSCHR6_MHC_APD_CTG1	3500814	3510698	6141.38	-0.255848	0.0898412	-2.84778	0.00440258	0.0375613
AGPAT1	-0.339195	-0.616039	0.631188	chr6_GL000251v2_alt	3606563	3616448	27213	ENST00000425204.2	ENSG00000226467.9	ENSG00000226467	HSCHR6_MHC_COX_CTG1	3606564	3616448	6141.38	-0.255848	0.0898412	-2.84778	0.00440258	0.0375613
AGPAT1	-0.339195	-0.616039	0.631188	chr6_GL000253v2_alt	3473192	3483077	28142	ENST00000456679.2	ENSG00000227642.9	ENSG00000227642	HSCHR6_MHC_MANN_CTG1	3473193	3483077	6141.38	-0.255848	0.0898412	-2.84778	0.00440258	0.0375613
AGPAT1	-0.339195	-0.616039	0.631188	chr6_GL000254v2_alt	3510232	3520117	34434	ENST00000448196.2	ENSG00000235758.9	ENSG00000235758	HSCHR6_MHC_MCF_CTG1	3510233	3520117	6141.38	-0.255848	0.0898412	-2.84778	0.00440258	0.0375613
AGPAT1	-0.339195	-0.616039	0.631188	chr6_GL000255v2_alt	3391412	3401297	20439	ENST00000383294.4	ENSG00000206324.11	ENSG00000206324	HSCHR6_MHC_QBL_CTG1	3391413	3401297	6141.38	-0.255848	0.0898412	-2.84778	0.00440258	0.0375613
AGPAT1	-0.339195	-0.616039	0.631188	chr6_GL000256v2_alt	3484418	3494303	29088	ENST00000417388.2	ENSG00000228892.9	ENSG00000228892	HSCHR6_MHC_SSTO_CTG1	3484419	3494303	6141.38	-0.255848	0.0898412	-2.84778	0.00440258	0.0375613
PAIP2	0.166844	-0.872388	0.632086	chr5	139341853	139369717	5097	ENST00000265192.9	ENSG00000120727.13	ENSG00000120727	5	139341587	139369720	1999.4	-0.347766	0.0862342	-4.03281	5.51143e-05	0.00125127
YWHAB	-0.189293	-0.67812	0.632324	chr20	44885704	44908532	11983	ENST00000353703.9	ENSG00000166913.13	ENSG00000166913	20	44885702	44908532	11987.5	-0.177181	0.0565213	-3.13476	0.00171995	0.0193006
SLC2A1	0.0399074	-0.783366	0.632615	chr1	42925352	42958868	4706	ENST00000426263.10	ENSG00000117394.24	ENSG00000117394	1	42925353	42958893	2690.82	-0.249705	0.0689549	-3.62128	0.000293143	0.00479705
TXNDC12	-0.401397	-0.592666	0.632717	chr1	52020130	52055191	4768	ENST00000371626.9	ENSG00000117862.13	ENSG00000117862	1	52020131	52055191	3054.12	-0.258057	0.0941904	-2.73973	0.00614892	0.0474999
RPPH1	0.126014	-0.844438	0.632757	chr14	20343074	20343407	57234	ENST00000516869.1	ENSG00000277209.1	ENSG00000277209	14	20343075	20343407	165.374	-0.84201	0.215701	-3.90361	9.47703e-05	0.00194398
RPPH1	0.126014	-0.844438	0.632757	chr14_MU273373v1_fix	545755	546088	69564	ENST00000708757.1	ENSG00000291789.1	ENSG00000291789	HG2526_HG2573_PATCH	545756	546088	165.374	-0.84201	0.215701	-3.90361	9.47703e-05	0.00194398
TM2D3	0.463332	-1.08376	0.633201	chr15	101641847	101652381	15705	ENST00000333202.8	ENSG00000184277.13	ENSG00000184277	15	101621444	101652391	1741.74	-0.432338	0.0862967	-5.00991	5.4456e-07	2.22445e-05
LRP5L	-0.677656	1.23712	0.634063	chr22	25351611	25405274	2181	ENST00000650500.2	ENSG00000100068.15	ENSG00000100068	22	25351612	25405274	279.574	0.769091	0.134483	5.71886	1.0724e-08	6.35428e-07
CASP2	0.161865	0.693325	0.635754	chr7	143288350	143307696	3271	ENST00000310447.10	ENSG00000106144.20	ENSG00000106144	7	143288215	143307696	3503.65	0.260135	0.081164	3.20505	0.00135039	0.0161987
GNPDA1	-0.346706	-0.619954	0.637017	chr5	142000670	142013027	4202	ENST00000311337.11	ENSG00000113552.16	ENSG00000113552	5	141991749	142013041	3037.03	-0.2017	0.07038	-2.86588	0.00415857	0.0360498
ST7L	-0.219582	0.918417	0.638181	chr1	112523513	112619141	180	ENST00000358039.9	ENSG00000007341.19	ENSG00000007341	1	112523514	112620825	496.499	0.454949	0.107158	4.24559	2.1802e-05	0.000565175
GLO1	-0.236492	-0.666669	0.638749	chr6	38675924	38703145	5584	ENST00000373365.5	ENSG00000124767.7	ENSG00000124767	6	38675925	38703145	14951.9	-0.194038	0.0629621	-3.08183	0.00205734	0.0217941
TECR	-0.266105	-0.655733	0.639637	chr19	14529593	14565980	2117	ENST00000215567.10	ENSG00000099797.15	ENSG00000099797	19	14517085	14565980	3881.54	-0.373603	0.12325	-3.03127	0.00243524	0.0247517
ZNF675	-0.416436	1.06138	0.639718	chr19	23652800	23687212	17410	ENST00000359788.9	ENSG00000197372.10	ENSG00000197372	19	23525631	23687220	174.302	0.804375	0.163942	4.90646	9.27334e-07	3.66314e-05
INO80	-0.666186	1.24041	0.639954	chr15	40978879	41116280	6088	ENST00000648947.1	ENSG00000128908.19	ENSG00000128908	15	40978880	41116280	1195.8	0.641792	0.111926	5.73407	9.80512e-09	5.8419e-07
RRN3	0.367462	0.615622	0.640432	chr16	15060032	15094272	1668	ENST00000198767.11	ENSG00000085721.13	ENSG00000085721	16	15060033	15094311	1890.84	0.304228	0.106902	2.84585	0.00442929	0.0376997
RRN3	0.367462	0.615622	0.640432	chr16_KI270853v1_alt	575358	609658	58205	ENST00000616334.2	ENSG00000278494.2	ENSG00000278494	HSCHR16_1_CTG1	575359	609658	1890.84	0.304228	0.106902	2.84585	0.00442929	0.0376997
RMND1	0.397415	0.604131	0.64097	chr6	151404761	151452126	9927	ENST00000444024.3	ENSG00000155906.20	ENSG00000155906	6	151398898	151452158	963.756	0.300523	0.107609	2.79273	0.00522652	0.0422193
PRCP	-0.285599	-0.65019	0.641609	chr11	82822935	82900430	7500	ENST00000313010.8	ENSG00000137509.12	ENSG00000137509	11	82822936	82970584	2502.97	-0.197466	0.0656982	-3.00565	0.00265013	0.0260757
UNC50	-0.129328	-0.715036	0.642901	chr2	98608588	98618515	4436	ENST00000357765.7	ENSG00000115446.12	ENSG00000115446	2	98608579	98618515	928.02	-0.316389	0.0957184	-3.30542	0.000948356	0.0122774
LINGO1	-0.138841	-0.711528	0.64319	chr15	77613026	77632912	12684	ENST00000355300.7	ENSG00000169783.13	ENSG00000169783	15	77613027	77820900	666.358	-0.296081	0.0900163	-3.2892	0.00100473	0.0128682
ERO1A	-0.154149	-0.706242	0.643957	chr14	52639914	52695558	17588	ENST00000395686.8	ENSG00000197930.13	ENSG00000197930	14	52639915	52695900	2804.55	-0.197637	0.0605363	-3.26476	0.00109556	0.01369
RBM42	-0.44099	-0.59235	0.645889	chr19	35629035	35637685	5812	ENST00000262633.9	ENSG00000126254.12	ENSG00000126254	19	35629030	35637686	6023.37	-0.223901	0.0817673	-2.73827	0.00617628	0.047643
ENO1	-0.331334	-0.637037	0.646112	chr1	8860999	8878686	1277	ENST00000234590.10	ENSG00000074800.16	ENSG00000074800	1	8861000	8879190	108902	-0.284943	0.0967599	-2.94485	0.00323113	0.0299351
ORMDL2	-0.396028	-0.612475	0.647489	chr12	55818040	55821879	5379	ENST00000243045.10	ENSG00000123353.10	ENSG00000123353	12	55818041	55821879	1376.67	-0.366425	0.129419	-2.8313	0.00463589	0.0390839
DEAF1	-0.308135	-0.64888	0.64816	chr11	644232	695222	14219	ENST00000382409.4	ENSG00000177030.19	ENSG00000177030	11	644233	707118	5433.9	-0.214676	0.0715685	-2.99959	0.0027034	0.0264311
DEAF1	-0.308135	-0.64888	0.64816	chr11_KI270832v1_alt	176429	206708	61356	ENST00000634194.1	ENSG00000282712.1	ENSG00000282712	HSCHR11_1_CTG8	176113	206708	5433.9	-0.214676	0.0715685	-2.99959	0.0027034	0.0264311
GNG7	-0.412971	-0.606578	0.648299	chr19	2511218	2702694	14110	ENST00000382159.8	ENSG00000176533.13	ENSG00000176533	19	2511219	2702694	496.423	-0.313175	0.111687	-2.80404	0.00504662	0.0412082
PCSK5	0.309452	0.648756	0.648503	chr9	75890672	76362975	2080	ENST00000674117.1	ENSG00000099139.14	ENSG00000099139	9	75890644	76362975	430.438	0.379613	0.126579	2.99902	0.0027085	0.026457
DZIP1L	-1.10615	1.57824	0.649479	chr3	138061989	138115608	10197	ENST00000327532.7	ENSG00000158163.15	ENSG00000158163	3	138061990	138115818	335.029	0.814683	0.111665	7.29578	2.96929e-13	4.44733e-11
VPS11	-0.002622	0.779408	0.651339	chr11	119067817	119081972	10527	ENST00000621676.5	ENSG00000160695.16	ENSG00000160695	11	119067818	119081972	1398.13	0.258784	0.0718248	3.60299	0.000314579	0.00509372
VPS11	-0.002622	0.779408	0.651339	chr11_KN196481v1_fix	89290	103577	59877	ENST00000626621.4	ENSG00000280616.4	ENSG00000280616	HG2217_PATCH	89291	103577	1398.13	0.258784	0.0718248	3.60299	0.000314579	0.00509372
MDM1	-0.0504514	0.814768	0.651772	chr12	68294565	68332362	3911	ENST00000682720.1	ENSG00000111554.15	ENSG00000111554	12	68272443	68332381	417.921	0.480416	0.127551	3.76645	0.000165586	0.00306291
ZFAND4	-0.0637662	0.828443	0.654914	chr10	45615499	45672772	13363	ENST00000344646.10	ENSG00000172671.20	ENSG00000172671	10	45615500	45672780	218.364	0.608302	0.15884	3.82966	0.000128318	0.00247104
MTPAP	-0.64951	1.25734	0.654989	chr10	30309800	30349278	3478	ENST00000263063.9	ENSG00000107951.15	ENSG00000107951	10	30309801	30374448	1616.52	0.370646	0.0637687	5.81235	6.16022e-09	4.00192e-07
ZDHHC24	0.00744002	-0.787584	0.655223	chr11	66535625	66546048	13660	ENST00000310442.5	ENSG00000174165.8	ENSG00000174165	11	66520637	66546235	929.152	-0.404984	0.111235	-3.64079	0.000271807	0.00451763
CTSD	-0.0145261	-0.777265	0.656072	chr11	1752754	1763927	4775	ENST00000236671.7	ENSG00000117984.15	ENSG00000117984	11	1752752	1764573	9854.43	-0.275756	0.0767464	-3.59308	0.00032679	0.00523641
MASTL	-0.0164347	0.795925	0.65667	chr10	27155351	27187953	5069	ENST00000375940.9	ENSG00000120539.15	ENSG00000120539	10	27154824	27187953	1395.08	0.343453	0.0933463	3.67934	0.000233835	0.00403468
ATXN7L1	-0.0257587	0.806675	0.659866	chr7	105604771	105876599	8894	ENST00000419735.8	ENSG00000146776.15	ENSG00000146776	7	105604772	105876599	151.331	0.594452	0.159412	3.72904	0.000192212	0.00344893
UBR1	0.324266	0.657606	0.660944	chr15	42942896	43106038	10367	ENST00000290650.9	ENSG00000159459.12	ENSG00000159459	15	42942897	43106113	695.861	0.516095	0.169772	3.03993	0.00236632	0.0241881
UIMC1	0.194526	0.710683	0.66138	chr5	176905005	177006779	1730	ENST00000511320.6	ENSG00000087206.17	ENSG00000087206	5	176905005	177022633	2027.23	0.292514	0.0890376	3.28529	0.00101877	0.013017
ZNF335	-0.313332	1.02122	0.661455	chr20	45948659	45972203	17625	ENST00000322927.3	ENSG00000198026.8	ENSG00000198026	20	45948660	45972203	2225.55	0.334093	0.0707701	4.72082	2.349e-06	8.38796e-05
ARL2BP	-0.466469	-0.60415	0.664421	chr16	57245258	57253635	2733	ENST00000219204.8	ENSG00000102931.8	ENSG00000102931	16	57245259	57253635	2473.72	-0.189823	0.0679683	-2.79282	0.00522508	0.0422193
GADD45B	-1.40935	1.84213	0.665294	chr19	2476126	2478257	2129	ENST00000215631.9	ENSG00000099860.9	ENSG00000099860	19	2476122	2478259	616.461	1.40734	0.165264	8.51568	1.65619e-17	4.7001e-15
CORO1B	-0.491665	-0.596286	0.666384	chr11	67435509	67443476	13371	ENST00000341356.10	ENSG00000172725.14	ENSG00000172725	11	67435510	67443821	2716.65	-0.189481	0.0687404	-2.75647	0.00584293	0.0457891
GSK3A	-0.490206	-0.601783	0.670493	chr19	42230189	42242602	3186	ENST00000222330.8	ENSG00000105723.13	ENSG00000105723	19	42226225	42242625	4509.48	-0.187337	0.0673419	-2.78188	0.00540452	0.0432041
KANSL2	-1.38361	1.83885	0.671083	chr12	48653210	48682238	7861	ENST00000420613.7	ENSG00000139620.13	ENSG00000139620	12	48653211	48682238	1476	0.692944	0.081518	8.5005	1.88773e-17	5.08933e-15
SLC29A1	-0.416183	-0.633027	0.671546	chr6	44223594	44234142	4111	ENST00000371755.9	ENSG00000112759.19	ENSG00000112759	6	44219553	44234142	4914.83	-0.230187	0.0786614	-2.92631	0.00343011	0.0312947
YIF1B	-0.134935	-0.75075	0.674722	chr19	38303557	38315947	12159	ENST00000339413.11	ENSG00000167645.17	ENSG00000167645	19	38303558	38317273	2682.71	-0.302722	0.0872271	-3.47051	0.00051947	0.00772698
ATMIN	-0.185841	-0.731172	0.675597	chr16	81035841	81047350	11872	ENST00000299575.5	ENSG00000166454.10	ENSG00000166454	16	81035842	81047350	1887.8	-0.223793	0.0662109	-3.38001	0.000724839	0.00998087
ATMIN	-0.185841	-0.731172	0.675597	chr16_MU273377v1_fix	84080	95589	69714	ENST00000709336.1	ENSG00000291953.1	ENSG00000291953	HG405_PATCH	84081	95589	1887.8	-0.223793	0.0662109	-3.38001	0.000724839	0.00998087
AFG3L1P	-1.20523	1.71797	0.676164	chr16	89972630	90000668	25257	ENST00000557444.5	ENSG00000223959.11	ENSG00000223959	16	89972581	90002161	1567.49	0.532833	0.0670931	7.9417	1.99436e-15	4.30145e-13
COCH	-0.312327	-0.680838	0.676354	chr14	30874558	30890618	2324	ENST00000396618.9	ENSG00000100473.18	ENSG00000100473	14	30874514	30895065	2229.33	-0.234048	0.0743641	-3.14733	0.00164772	0.0186578
TMEM50A	-0.41014	-0.641616	0.676691	chr1	25338333	25362361	15574	ENST00000374358.5	ENSG00000183726.11	ENSG00000183726	1	25338317	25362361	4356.93	-0.238154	0.0802944	-2.96601	0.00301687	0.0287656
HLA-A	-0.3924	-0.649213	0.677035	chr6	29942531	29945870	20527	ENST00000376809.10	ENSG00000206503.14	ENSG00000206503	6	29941260	29949572	4269.5	-0.383854	0.127903	-3.00113	0.00268976	0.0263455
HLA-A	-0.3924	-0.649213	0.677035	chr6_GL000250v2_alt	1147347	1267669	29338	ENST00000640829.1	ENSG00000229215.9	ENSG00000229215	HSCHR6_MHC_APD_CTG1	1147348	1267669	4269.5	-0.383854	0.127903	-3.00113	0.00268976	0.0263455
HLA-A	-0.3924	-0.649213	0.677035	chr6_GL000251v2_alt	1369021	1489345	25539	ENST00000638213.1	ENSG00000224320.9	ENSG00000224320	HSCHR6_MHC_COX_CTG1	1369022	1489345	4269.5	-0.383854	0.127903	-3.00113	0.00268976	0.0263455
HLA-A	-0.3924	-0.649213	0.677035	chr6_GL000252v2_alt	1144954	1265390	34355	ENST00000638608.1	ENSG00000235657.9	ENSG00000235657	HSCHR6_MHC_DBB_CTG1	1144955	1265390	4269.5	-0.383854	0.127903	-3.00113	0.00268976	0.0263455
HLA-A	-0.3924	-0.649213	0.677035	chr6_GL000253v2_alt	1195800	1200442	31367	ENST00000456012.5	ENSG00000231834.10	ENSG00000231834	HSCHR6_MHC_MANN_CTG1	1195801	1200442	4269.5	-0.383854	0.127903	-3.00113	0.00268976	0.0263455
HLA-A	-0.3924	-0.649213	0.677035	chr6_GL000254v2_alt	1286635	1289979	28200	ENST00000455882.5	ENSG00000227715.11	ENSG00000227715	HSCHR6_MHC_MCF_CTG1	1286636	1289979	4269.5	-0.383854	0.127903	-3.00113	0.00268976	0.0263455
HLA-A	-0.3924	-0.649213	0.677035	chr6_GL000255v2_alt	1197510	1264879	20529	ENST00000638354.1	ENSG00000206505.13	ENSG00000206505	HSCHR6_MHC_QBL_CTG1	1196218	1264879	4269.5	-0.383854	0.127903	-3.00113	0.00268976	0.0263455
HLA-A	-0.3924	-0.649213	0.677035	chr6_GL000256v2_alt	1239480	1307767	25276	ENST00000638335.1	ENSG00000223980.10	ENSG00000223980	HSCHR6_MHC_SSTO_CTG1	1239073	1307767	4269.5	-0.383854	0.127903	-3.00113	0.00268976	0.0263455
UBAP2	-0.222624	0.979769	0.679208	chr9	33921692	34048887	7405	ENST00000379238.7	ENSG00000137073.24	ENSG00000137073	9	33921693	34049388	3403.76	0.363378	0.08023	4.5292	5.92068e-06	0.000182425
PSMD2	-0.463024	-0.625106	0.680807	chr3	184299240	184309050	13845	ENST00000310118.9	ENSG00000175166.17	ENSG00000175166	3	184299198	184309050	13495.1	-0.186395	0.0645034	-2.88969	0.0038562	0.0339472
GPI	-0.366787	-0.667189	0.683402	chr19	34365195	34402413	3058	ENST00000356487.11	ENSG00000105220.17	ENSG00000105220	19	34359480	34402413	20731.7	-0.231344	0.0750086	-3.08423	0.00204079	0.0216655
GPI	-0.366787	-0.667189	0.683402	chr19_KI270866v1_alt	14173	30733	60689	ENST00000632704.1	ENSG00000282019.1	ENSG00000282019	HSCHR19_2_CTG3_1	8674	30733	20731.7	-0.231344	0.0750086	-3.08423	0.00204079	0.0216655
MSH3	0.22644	0.728204	0.686888	chr5	80654651	80876815	4175	ENST00000265081.7	ENSG00000113318.11	ENSG00000113318	5	80654652	80876815	803.972	0.276346	0.0820922	3.36629	0.000761873	0.0102887
CNIH4	-0.575939	-0.587839	0.687907	chr1	224356878	224379452	8472	ENST00000465271.6	ENSG00000143771.12	ENSG00000143771	1	224356858	224379459	2963.4	-0.314853	0.115865	-2.71742	0.00657931	0.0497206
PFN2	-0.480281	-0.626608	0.687922	chr3	149964903	149970895	1100	ENST00000239940.12	ENSG00000070087.15	ENSG00000070087	3	149964904	150050788	6303.85	-0.210693	0.072737	-2.89664	0.00377184	0.0334228
TEX261	-0.524226	-0.609644	0.688624	chr2	70985941	70994873	8525	ENST00000272438.9	ENSG00000144043.13	ENSG00000144043	2	70968325	70994873	7178.94	-0.180588	0.0640787	-2.81822	0.0048291	0.039967
CALM1	-0.286411	-0.707832	0.690174	chr14	90397028	90408268	17817	ENST00000356978.9	ENSG00000198668.14	ENSG00000198668	14	90396502	90408268	9854.19	-0.254501	0.0777788	-3.27211	0.00106747	0.0133856
RIPK2	0.20693	0.740223	0.690336	chr8	89757815	89791064	2900	ENST00000220751.5	ENSG00000104312.8	ENSG00000104312	8	89757806	89791064	703.244	0.30145	0.0880956	3.42185	0.000621972	0.00886446
KLF9	0.0450498	0.806086	0.690575	chr9	70384603	70414657	4881	ENST00000377126.4	ENSG00000119138.5	ENSG00000119138	9	70384604	70414657	1038.87	0.54307	0.145739	3.72631	0.000194302	0.00348065
NETO2	-0.132919	-0.771119	0.691102	chr16	47077702	47143945	13017	ENST00000562435.6	ENSG00000171208.10	ENSG00000171208	16	47077703	47143945	2183.65	-0.273949	0.0768511	-3.56467	0.000364315	0.00571042
CD81	-0.370566	-0.675988	0.692056	chr11	2377309	2397397	3796	ENST00000263645.10	ENSG00000110651.13	ENSG00000110651	11	2376177	2397802	13392.6	-0.38627	0.12361	-3.12491	0.00177861	0.0197612
FAM193A	-1.3779	1.89199	0.692085	chr4	2536646	2732573	5647	ENST00000637812.2	ENSG00000125386.16	ENSG00000125386	4	2536647	2732573	1125.44	0.872295	0.099735	8.74613	2.20797e-18	7.44087e-16
PEPD	0.00505209	-0.831928	0.693655	chr19	33386949	33521791	5512	ENST00000244137.12	ENSG00000124299.16	ENSG00000124299	19	33386950	33521823	2935.81	-0.230345	0.0598956	-3.84578	0.000120171	0.00234769
AP2M1	-0.376546	-0.678138	0.695886	chr3	184174854	184184091	10598	ENST00000292807.9	ENSG00000161203.14	ENSG00000161203	3	184174689	184184214	17656.3	-0.277377	0.0884821	-3.13484	0.00171946	0.0193006
UBA1	-0.497827	-0.629324	0.696152	chrX	47193828	47215128	6378	ENST00000335972.11	ENSG00000130985.17	ENSG00000130985	X	47190861	47215128	30639	-0.170416	0.0585783	-2.90919	0.00362363	0.0325821
ZNF17	-1.24562	1.80115	0.696526	chr19	57411160	57421934	16213	ENST00000307658.12	ENSG00000186272.13	ENSG00000186272	19	57411161	57421934	325.846	0.833862	0.100149	8.32621	8.34693e-17	2.19545e-14
HSPA2	-0.0689	-0.80364	0.69662	chr14	64540740	64543237	5864	ENST00000247207.7	ENSG00000126803.10	ENSG00000126803	14	64535905	64546173	382.761	-0.375404	0.101051	-3.71501	0.000203198	0.00359227
TOMM22	-0.549046	-0.612378	0.699337	chr22	38681956	38685421	2224	ENST00000216034.6	ENSG00000100216.6	ENSG00000100216	22	38681957	38685421	8238.07	-0.305842	0.108039	-2.83085	0.00464239	0.0390839
LMO4	-0.601888	-0.593057	0.701083	chr1	87328879	87348923	8314	ENST00000370544.10	ENSG00000143013.13	ENSG00000143013	1	87328880	87348923	2017.97	-0.225762	0.0823487	-2.74154	0.00611522	0.0473074
CALR	-0.495699	-0.637899	0.702613	chr19	12938608	12944489	14653	ENST00000316448.10	ENSG00000179218.15	ENSG00000179218	19	12938578	12944489	24517	-0.203948	0.0691621	-2.94883	0.00318976	0.0296794
NCOA5	-0.050101	0.878412	0.702904	chr20	46060990	46089962	5472	ENST00000290231.11	ENSG00000124160.12	ENSG00000124160	20	46060991	46089962	3121.79	0.278872	0.0686766	4.06066	4.89348e-05	0.00113243
PRPF38B	-0.656024	1.35676	0.704106	chr1	108692309	108702928	6851	ENST00000370025.9	ENSG00000134186.12	ENSG00000134186	1	108692310	108702928	2766.34	0.486006	0.0774893	6.27191	3.56641e-10	3.07681e-08
GLMP	-0.564937	-0.612374	0.704726	chr1	156292687	156295679	17839	ENST00000362007.6	ENSG00000198715.13	ENSG00000198715	1	156290089	156295689	3231.54	-0.286584	0.101237	-2.83083	0.00464267	0.0390839
PIN1	-0.595163	-0.601231	0.705649	chr19	9835317	9849689	5924	ENST00000247970.9	ENSG00000127445.14	ENSG00000127445	19	9835257	9849689	5380.86	-0.29436	0.105911	-2.77932	0.00544721	0.0434818
SHKBP1	-0.487719	-0.646489	0.707101	chr19	40576872	40591397	10499	ENST00000291842.10	ENSG00000160410.15	ENSG00000160410	19	40576853	40591399	2330.61	-0.192033	0.0642565	-2.98854	0.00280312	0.0271598
PDIA6	-0.153353	-0.782278	0.707384	chr2	10783390	10812785	8495	ENST00000272227.8	ENSG00000143870.13	ENSG00000143870	2	10783391	10837977	12278.2	-0.232232	0.0642189	-3.61625	0.000298897	0.00488379
BLOC1S1	-0.598272	-0.602153	0.707477	chr12	55716045	55719703	7085	ENST00000548925.6	ENSG00000135441.8	ENSG00000135441	12	55716038	55720087	1879.57	-0.448043	0.160959	-2.78359	0.0053761	0.0430727
SCYL3	-1.1565	1.76031	0.708005	chr1	169849630	169893896	4	ENST00000367771.11	ENSG00000000457.14	ENSG00000000457	1	169849631	169894267	289.496	1.03368	0.127028	8.13743	4.03759e-16	1.01259e-13
PITX1	-0.490595	-0.647004	0.708509	chr5	135027733	135034228	1064	ENST00000265340.12	ENSG00000069011.16	ENSG00000069011	5	135027734	135034813	2374.43	-0.27556	0.0921322	-2.99092	0.00278135	0.0270217
EFNA3	-0.5199	-0.635229	0.708589	chr1	155078836	155087538	8444	ENST00000368408.4	ENSG00000143590.14	ENSG00000143590	1	155078837	155087538	564.687	-0.407667	0.138828	-2.93649	0.00331953	0.0304922
GIPC1	-0.6005	-0.602895	0.708854	chr19	14477761	14496127	5359	ENST00000393033.9	ENSG00000123159.16	ENSG00000123159	19	14477760	14496149	6116.12	-0.290675	0.104296	-2.78702	0.00531959	0.0426865
SLC7A6OS	0.136671	0.791528	0.709473	chr16	68298033	68310946	2759	ENST00000263997.11	ENSG00000103061.13	ENSG00000103061	16	68284503	68310946	432.115	0.380152	0.103895	3.65902	0.000253184	0.00429299
DERL1	-0.408113	-0.681639	0.709532	chr8	123013169	123042302	7396	ENST00000259512.9	ENSG00000136986.10	ENSG00000136986	8	123013170	123042302	2632.96	-0.188231	0.0597363	-3.15103	0.00162695	0.0185685
ARHGDIA	-0.63614	-0.590632	0.710676	chr17	81867720	81871337	8139	ENST00000269321.12	ENSG00000141522.12	ENSG00000141522	17	81867721	81871378	18935.2	-0.251165	0.0919909	-2.73033	0.00632715	0.0485291
ATP13A2	-0.198586	-0.768235	0.710971	chr1	16985957	17011928	10353	ENST00000326735.13	ENSG00000159363.19	ENSG00000159363	1	16985958	17011928	2416.86	-0.277285	0.0780789	-3.55134	0.000383276	0.00596428
SFI1	-0.119298	0.943833	0.711237	chr22	31496535	31618588	17648	ENST00000400288.7	ENSG00000198089.16	ENSG00000198089	22	31488688	31618588	934.34	0.393447	0.0901764	4.36308	1.28243e-05	0.000352579
TMBIM6	0.0822206	-0.916089	0.712583	chr12	49741556	49764934	7870	ENST00000267115.10	ENSG00000139644.13	ENSG00000139644	12	49707725	49764934	15306.3	-0.246654	0.0582441	-4.23483	2.28727e-05	0.000585888
CTBP1	-0.469151	-0.661213	0.713134	chr4	1211444	1249130	10388	ENST00000382952.8	ENSG00000159692.18	ENSG00000159692	4	1211445	1250333	4546.34	-0.182645	0.059754	-3.05661	0.00223858	0.0231234
TYW5	-0.57789	1.3145	0.71456	chr2	199928912	199955491	10887	ENST00000354611.9	ENSG00000162971.11	ENSG00000162971	2	199928913	199955736	417.656	0.684261	0.112607	6.07657	1.22784e-09	9.13176e-08
CD151	-0.503305	-0.651164	0.716307	chr11	832951	838831	14366	ENST00000397420.9	ENSG00000177697.19	ENSG00000177697	11	832887	839831	6150.93	-0.325623	0.108175	-3.01015	0.00261116	0.0258101
TBC1D22B	0.531513	0.641815	0.718047	chr6	37257771	37332970	932	ENST00000373491.3	ENSG00000065491.8	ENSG00000065491	6	37257772	37332970	702.258	0.269741	0.0909158	2.96693	0.00300786	0.0287305
ZNF268	-0.639055	1.37456	0.720437	chr12	133181494	133214832	1890	ENST00000536435.7	ENSG00000090612.22	ENSG00000090612	12	133181409	133214832	502.423	0.663234	0.104377	6.35421	2.09494e-10	1.88265e-08
RPS5	-0.650935	-0.597024	0.721051	chr19	58387268	58394804	1614	ENST00000196551.8	ENSG00000083845.9	ENSG00000083845	19	58386400	58394806	36417.9	-0.359573	0.130286	-2.75988	0.00578234	0.0454495
TMCO1	-0.648861	-0.599305	0.722259	chr1	165726794	165768868	8344	ENST00000367881.11	ENSG00000143183.18	ENSG00000143183	1	165724293	165827755	4586.28	-0.257809	0.0930576	-2.77042	0.00559833	0.0444569
SRPRB	-0.674351	-0.589085	0.722348	chr3	133805814	133821492	8646	ENST00000678299.1	ENSG00000144867.13	ENSG00000144867	3	133784023	133825772	5512.38	-0.222347	0.0816498	-2.72318	0.00646569	0.049381
GRN	-0.323048	-0.731786	0.722674	chr17	44345301	44353106	487	ENST00000053867.8	ENSG00000030582.19	ENSG00000030582	17	44345246	44353106	7421.93	-0.273195	0.0807588	-3.38285	0.000717391	0.00992832
ZNF121	-0.506898	1.27389	0.723698	chr19	9560328	9584504	17601	ENST00000320451.7	ENSG00000197961.12	ENSG00000197961	19	9560329	9584504	275.144	1.34879	0.229042	5.88882	3.88962e-09	2.65479e-07
POMZP3	0.0573157	0.84132	0.724255	chr7	76609985	76627279	8887	ENST00000310842.9	ENSG00000146707.15	ENSG00000146707	7	76609986	76627279	170.746	0.671449	0.172645	3.88919	0.000100579	0.00203117
POMZP3	0.0573157	0.84132	0.724255	chr7_KI270809v1_alt	96820	114076	56671	ENST00000619075.4	ENSG00000276464.4	ENSG00000276464	HSCHR7_2_CTG4_4	96821	114096	170.746	0.671449	0.172645	3.88919	0.000100579	0.00203117
RAB11A	-0.672209	-0.596122	0.727516	chr15	65869490	65891989	2857	ENST00000261890.7	ENSG00000103769.10	ENSG00000103769	15	65726054	65891989	4913.67	-0.177487	0.064407	-2.75571	0.00585649	0.0457986
E2F2	-0.698517	1.43682	0.727721	chr1	23506437	23531233	197	ENST00000361729.3	ENSG00000007968.7	ENSG00000007968	1	23506438	23531233	1203.28	0.516913	0.0778245	6.64203	3.09394e-11	3.17762e-09
E2F2	-0.698517	1.43682	0.727721	chr1_KQ458383v1_alt	276416	301212	61521	ENST00000634683.2	ENSG00000282899.2	ENSG00000282899	HSCHR1_4_CTG3	276417	301212	1203.28	0.516913	0.0778245	6.64203	3.09394e-11	3.17762e-09
PPIB	-0.663432	-0.603065	0.730353	chr15	64155816	64163022	11942	ENST00000300026.4	ENSG00000166794.6	ENSG00000166794	15	64155740	64163134	16161.3	-0.374831	0.134454	-2.7878	0.00530668	0.0426433
EI24	-0.530378	-0.662915	0.735338	chr11	125569476	125584684	9238	ENST00000278903.11	ENSG00000149547.15	ENSG00000149547	11	125569280	125584684	9820.73	-0.168021	0.0548288	-3.06447	0.00218053	0.0226978
RASL10B	-0.59297	-0.63879	0.73637	chr17	35731638	35743521	52887	ENST00000603017.2	ENSG00000270885.2	ENSG00000270885	17	35731639	35743521	1442.09	-0.289332	0.0979808	-2.95295	0.00314751	0.0295926
RABL6	-0.122625	-0.829342	0.736384	chr9	136807947	136841187	17187	ENST00000311502.12	ENSG00000196642.19	ENSG00000196642	9	136807943	136841187	8601.86	-0.220683	0.0575622	-3.83382	0.000126168	0.00243398
FOXD2-AS1	-0.597018	-0.640981	0.739579	chr1	47432132	47434641	35721	ENST00000445551.1	ENSG00000237424.1	ENSG00000237424	1	47432133	47434641	404.537	-0.392913	0.132603	-2.96308	0.00304578	0.0289134
TMEM59	-0.261006	-0.77735	0.73979	chr1	54026680	54053204	4557	ENST00000234831.10	ENSG00000116209.12	ENSG00000116209	1	54026681	54053504	3379	-0.247653	0.0689175	-3.59347	0.000326299	0.00523633
RMRP	0.0629183	-0.936186	0.740644	chr9	35657753	35658017	57098	ENST00000363046.1	ENSG00000277027.1	ENSG00000277027	9	35657754	35658017	212.294	-1.13362	0.261944	-4.32773	1.50653e-05	0.00040616
SLC10A3	-0.534643	-0.670085	0.742793	chrX	154487310	154490629	5880	ENST00000651600.1	ENSG00000126903.16	ENSG00000126903	X	154487306	154490690	978.469	-0.270771	0.0874125	-3.09762	0.00195081	0.0211009
SLC25A23	-0.71188	-0.600054	0.744272	chr19	6440063	6459792	5688	ENST00000301454.9	ENSG00000125648.15	ENSG00000125648	19	6436079	6465203	4792.83	-0.219418	0.0791014	-2.77388	0.00553917	0.0440821
HLA-C	-0.413613	-0.722385	0.745533	chr6	31268748	31272092	19920	ENST00000376228.10	ENSG00000204525.18	ENSG00000204525	6	31268749	31272130	9256.89	-0.293288	0.087827	-3.33939	0.000839632	0.0110557
HLA-C	-0.413613	-0.722385	0.745533	chr6_GL000251v2_alt	2749674	2753056	32928	ENST00000424832.6	ENSG00000233841.11	ENSG00000233841	HSCHR6_MHC_COX_CTG1	2749675	2753056	9256.89	-0.293288	0.087827	-3.33939	0.000839632	0.0110557
HLA-C	-0.413613	-0.722385	0.745533	chr6_GL000252v2_alt	2526548	2529920	28636	ENST00000420206.5	ENSG00000228299.9	ENSG00000228299	HSCHR6_MHC_DBB_CTG1	2526549	2529920	9256.89	-0.293288	0.087827	-3.33939	0.000839632	0.0110557
HLA-C	-0.413613	-0.722385	0.745533	chr6_GL000253v2_alt	2577800	2581172	35411	ENST00000438171.6	ENSG00000237022.10	ENSG00000237022	HSCHR6_MHC_MANN_CTG1	2577801	2581172	9256.89	-0.293288	0.087827	-3.33939	0.000839632	0.0110557
HLA-C	-0.413613	-0.722385	0.745533	chr6_GL000254v2_alt	2611477	2614849	26605	ENST00000457903.6	ENSG00000225691.7	ENSG00000225691	HSCHR6_MHC_MCF_CTG1	2611478	2614849	9256.89	-0.293288	0.087827	-3.33939	0.000839632	0.0110557
HLA-C	-0.413613	-0.722385	0.745533	chr6_GL000255v2_alt	2524180	2527552	20492	ENST00000400394.7	ENSG00000206452.10	ENSG00000206452	HSCHR6_MHC_QBL_CTG1	2524181	2527552	9256.89	-0.293288	0.087827	-3.33939	0.000839632	0.0110557
HLA-C	-0.413613	-0.722385	0.745533	chr6_GL000256v2_alt	2570706	2574099	20481	ENST00000400341.7	ENSG00000206435.10	ENSG00000206435	HSCHR6_MHC_SSTO_CTG1	2570707	2574099	9256.89	-0.293288	0.087827	-3.33939	0.000839632	0.0110557
MAGED2	-0.222892	-0.800917	0.746598	chrX	54807744	54816015	2665	ENST00000375068.6	ENSG00000102316.17	ENSG00000102316	X	54807599	54816015	4302.72	-0.283034	0.0764458	-3.70242	0.000213555	0.00376303
ACTB	-0.655553	-0.626692	0.747473	chr7	5527147	5530601	1317	ENST00000646664.1	ENSG00000075624.17	ENSG00000075624	7	5526409	5563902	114869	-0.286558	0.0989144	-2.89703	0.00376719	0.033409
TMED10	-0.534068	-0.675963	0.747522	chr14	75131468	75176612	12808	ENST00000303575.9	ENSG00000170348.9	ENSG00000170348	14	75131469	75176612	6973.83	-0.220114	0.0704412	-3.12479	0.00177931	0.0197612
SEMA3G	0.0891203	0.857058	0.748232	chr3	52433034	52445103	259	ENST00000231721.7	ENSG00000010319.7	ENSG00000010319	3	52433035	52445103	200.349	0.657007	0.16583	3.96194	7.43423e-05	0.00159385
ADM5	-0.608108	-0.647889	0.749129	chr19	49689593	49690575	25625	ENST00000420022.4	ENSG00000224420.4	ENSG00000224420	19	49689594	49690575	287.939	-0.478585	0.159794	-2.99501	0.00274434	0.0267827
ATP6AP1	-0.668107	-0.623706	0.749232	chrX	154428676	154436516	1158	ENST00000369762.7	ENSG00000071553.18	ENSG00000071553	X	154428633	154436516	8393.98	-0.225352	0.0781598	-2.88322	0.0039363	0.0343996
SLC35B2	-0.238275	-0.799935	0.750996	chr6	44254100	44257528	10129	ENST00000393812.4	ENSG00000157593.20	ENSG00000157593	6	44254096	44257890	2779.71	-0.257891	0.0697402	-3.69788	0.000217409	0.0037999
INPP5B	0.0730623	0.871141	0.754581	chr1	37860696	37947053	19752	ENST00000373024.8	ENSG00000204084.14	ENSG00000204084	1	37860697	37947053	805.783	0.32653	0.0810844	4.02704	5.64826e-05	0.00127162
LRP10	-0.740741	-0.603122	0.756638	chr14	22871739	22881713	17396	ENST00000359591.9	ENSG00000197324.9	ENSG00000197324	14	22871740	22881713	1369.63	-0.189917	0.0681178	-2.78807	0.00530232	0.04264
TMED2	-0.656765	-0.637449	0.756896	chr12	123584551	123598582	1702	ENST00000262225.8	ENSG00000086598.11	ENSG00000086598	12	123584533	123598582	6958.81	-0.177347	0.060184	-2.94675	0.00321132	0.0298542
RAD52	-0.896565	1.66317	0.757442	chr12	911735	949694	20	ENST00000358495.8	ENSG00000002016.18	ENSG00000002016	12	911736	990053	342.812	0.847581	0.110242	7.68836	1.49035e-14	2.72407e-12
SLC17A5	-0.774746	-0.590491	0.757596	chr6	73593378	73653992	4980	ENST00000355773.6	ENSG00000119899.13	ENSG00000119899	6	73593379	73653992	448.266	-0.270863	0.099229	-2.72968	0.00633964	0.0485904
MORF4L2	-0.529983	-0.689752	0.757686	chrX	103675497	103686699	5407	ENST00000441076.7	ENSG00000123562.18	ENSG00000123562	X	103675496	103688158	18910.6	-0.147065	0.0461232	-3.18853	0.00142997	0.0169088
CD9	-0.555299	-0.681438	0.759313	chr12	6200399	6238266	253	ENST00000009180.10	ENSG00000010278.15	ENSG00000010278	12	6199715	6238271	1004.91	-0.399374	0.126781	-3.1501	0.00163213	0.0186056
USB1	-0.475083	-0.714276	0.7596	chr16	58001406	58021618	2745	ENST00000219281.8	ENSG00000103005.13	ENSG00000103005	16	57999546	58021618	2698.53	-0.252044	0.0763331	-3.3019	0.00096032	0.0123877
ZNF564	-1.2964	2.0088	0.760144	chr19	12525372	12551482	40274	ENST00000339282.12	ENSG00000249709.8	ENSG00000249709	19	12525373	12551542	191.185	1.39357	0.15007	9.28612	1.6002e-20	6.16306e-18
ST13	-0.353322	-0.764616	0.760451	chr22	40824534	40856639	2295	ENST00000216218.8	ENSG00000100380.15	ENSG00000100380	22	40824535	40856639	9262.56	-0.224113	0.0634052	-3.53461	0.000408379	0.00627344
EIF5A	-0.596675	-0.666394	0.760751	chr17	7307627	7312463	6606	ENST00000336458.13	ENSG00000132507.18	ENSG00000132507	17	7306999	7312463	46251.6	-0.34595	0.112301	-3.08055	0.00206616	0.0218483
EIF5A	-0.596675	-0.666394	0.760751	chr17_ML143374v1_fix	65363	70828	66308	ENST00000672765.1	ENSG00000288145.1	ENSG00000288145	HG2087_PATCH	65364	70828	46251.6	-0.34595	0.112301	-3.08055	0.00206616	0.0218483
ISOC2	-0.7198	-0.618745	0.762618	chr19	55452984	55461642	858	ENST00000425675.7	ENSG00000063241.8	ENSG00000063241	19	55452985	55462343	3133.22	-0.302953	0.105917	-2.86029	0.00423258	0.0365445
BLCAP	-0.556589	-0.685533	0.763182	chr20	37517416	37527876	11913	ENST00000373537.7	ENSG00000166619.15	ENSG00000166619	20	37492472	37527931	2080.98	-0.234163	0.0738909	-3.16903	0.00152948	0.0177928
PMAIP1	0.0694149	0.882971	0.763253	chr18	59899995	59904305	8171	ENST00000316660.7	ENSG00000141682.12	ENSG00000141682	18	59899996	59904305	1817.39	0.706261	0.17303	4.08173	4.47014e-05	0.00105024
PIBF1	-0.571838	1.39923	0.763427	chr13	72782132	73016461	1598	ENST00000326291.11	ENSG00000083535.16	ENSG00000083535	13	72782133	73016461	609.564	0.72298	0.111774	6.46825	9.91451e-11	9.37878e-09
IFNGR2	-0.462728	-0.723908	0.763476	chr21	33403412	33437516	10308	ENST00000290219.11	ENSG00000159128.16	ENSG00000159128	21	33403413	33479348	1312.34	-0.281452	0.0841054	-3.34643	0.000818606	0.0108584
IFNGR2	-0.462728	-0.723908	0.763476	chr21_GL383581v2_alt	5407	32093	48967	ENST00000573079.5	ENSG00000262795.5	ENSG00000262795	HSCHR21_4_CTG1_1	5408	83477	1312.34	-0.281452	0.0841054	-3.34643	0.000818606	0.0108584
HSP90AB1	-0.691373	-0.631798	0.763906	chr6	44247100	44253883	2064	ENST00000371646.10	ENSG00000096384.20	ENSG00000096384	6	44246166	44253888	69105.9	-0.195945	0.06709	-2.92063	0.00349326	0.0316563
LRP3	-0.499935	-0.713397	0.767298	chr19	33194329	33208864	6366	ENST00000253193.9	ENSG00000130881.14	ENSG00000130881	19	33177603	33208864	3561.59	-0.251198	0.0761705	-3.29784	0.000974319	0.0125383
ARIH1	0.393749	0.75701	0.767798	chr15	72474329	72602987	11808	ENST00000379887.9	ENSG00000166233.15	ENSG00000166233	15	72474330	72602987	2660.71	0.280617	0.080189	3.49945	0.000466225	0.00699272
ARL6IP1	-0.647196	-0.65535	0.768644	chr16	18791668	18801549	12861	ENST00000304414.12	ENSG00000170540.15	ENSG00000170540	16	18791669	18801572	5447.33	-0.251861	0.083136	-3.0295	0.00244957	0.0248132
AP3S1	-0.377885	-0.767432	0.771145	chr5	115841934	115914081	14399	ENST00000316788.12	ENSG00000177879.17	ENSG00000177879	5	115841592	115914081	1722.73	-0.291014	0.0820306	-3.54763	0.000388718	0.0060229
PGRMC1	-0.449713	-0.738467	0.771257	chrX	119236284	119244466	2584	ENST00000217971.8	ENSG00000101856.10	ENSG00000101856	X	119236245	119244466	11931.2	-0.255215	0.0747614	-3.41373	0.000640797	0.0090687
TMEM106C	-0.73391	-0.623867	0.771697	chr12	47963595	47968878	6880	ENST00000429772.7	ENSG00000134291.12	ENSG00000134291	12	47963569	47968878	6227.33	-0.252832	0.0876682	-2.88396	0.00392703	0.0343464
CALM2	-0.827849	-0.588435	0.773895	chr2	47160083	47176511	8503	ENST00000272298.12	ENSG00000143933.20	ENSG00000143933	2	47160084	47176921	12371.1	-0.274299	0.100839	-2.72018	0.00652473	0.0495163
YWHAZ	-0.520474	-0.713581	0.774422	chr8	100916522	100952020	11486	ENST00000395958.6	ENSG00000164924.18	ENSG00000164924	8	100916523	100953388	17989.4	-0.234985	0.0712359	-3.29869	0.000971375	0.0125153
IDH1	-0.53702	-0.708006	0.775367	chr2	208236228	208255071	7676	ENST00000345146.7	ENSG00000138413.14	ENSG00000138413	2	208236229	208266074	2452.03	-0.257655	0.0787234	-3.27292	0.00106444	0.0133632
BSG	-0.675584	-0.65348	0.776712	chr19	572595	583493	13271	ENST00000333511.9	ENSG00000172270.22	ENSG00000172270	19	571277	583494	24619	-0.290436	0.0961434	-3.02086	0.00252061	0.0253158
IGFBPL1	-0.54617	-0.705933	0.776736	chr9	38406527	38424454	7422	ENST00000377694.2	ENSG00000137142.5	ENSG00000137142	9	38406528	38424454	1362.62	-0.290811	0.0891145	-3.26334	0.00110109	0.0137432
HERPUD1	-0.302771	-0.804608	0.776798	chr16	56932141	56944864	689	ENST00000439977.7	ENSG00000051108.15	ENSG00000051108	16	56932142	56944864	1586.53	-0.433634	0.116584	-3.71948	0.000199632	0.00354083
FKBP1A	-0.562633	-0.705362	0.781844	chr20	1368977	1393054	1791	ENST00000400137.9	ENSG00000088832.18	ENSG00000088832	20	1368977	1393164	8130.99	-0.33165	0.101711	-3.2607	0.00111139	0.013792
PDXP	-0.662214	-0.665083	0.781895	chr22	37658722	37666932	37571	ENST00000215904.7	ENSG00000241360.2	ENSG00000241360	22	37658723	37666932	5644.8	-0.318414	0.103566	-3.0745	0.00210857	0.0221648
PCGF6	0.5251	0.721362	0.78251	chr10	103302795	103351140	9984	ENST00000369847.4	ENSG00000156374.16	ENSG00000156374	10	103302796	103351144	1154.82	0.29462	0.0883507	3.33466	0.000854043	0.0112044
C19orf12	-0.657323	-0.667939	0.782628	chr19	29698936	29715261	6523	ENST00000323670.14	ENSG00000131943.20	ENSG00000131943	19	29698937	29715789	670.633	-0.284971	0.0922923	-3.0877	0.00201712	0.0215528
C1GALT1C1	-0.548907	-0.715042	0.785295	chrX	120625673	120630054	13002	ENST00000304661.6	ENSG00000171155.8	ENSG00000171155	X	120625674	120630054	1367.24	-0.327355	0.0990351	-3.30544	0.000948266	0.0122774
C1GALT1C1	-0.548907	-0.715042	0.785295	chrX_ML143381v1_fix	25741	30122	66522	ENST00000673177.1	ENSG00000288368.1	ENSG00000288368	HG439_PATCH	25742	30122	1367.24	-0.327355	0.0990351	-3.30544	0.000948266	0.0122774
PAICS	-0.701769	-0.659326	0.790495	chr4	56436259	56464578	5989	ENST00000512576.3	ENSG00000128050.9	ENSG00000128050	4	56435741	56464578	20743	-0.157111	0.0515474	-3.04788	0.0023046	0.0236693
KLF11	-0.169508	1.09342	0.790527	chr2	10043549	10054836	13223	ENST00000305883.6	ENSG00000172059.11	ENSG00000172059	2	10042849	10054836	979.148	0.635686	0.125765	5.05457	4.31365e-07	1.81712e-05
CBX6	-0.626145	-0.690769	0.791172	chr22	38861421	38872216	15578	ENST00000407418.8	ENSG00000183741.12	ENSG00000183741	22	38861422	38872249	7380.7	-0.285046	0.0892656	-3.19323	0.00140689	0.0167276
LY6E	-0.771701	-0.631924	0.791273	chr8	143018528	143022409	10564	ENST00000292494.11	ENSG00000160932.11	ENSG00000160932	8	143017982	143023832	7543.07	-0.374186	0.128093	-2.92121	0.00348671	0.031647
LY6E	-0.771701	-0.631924	0.791273	chr8_KI270817v1_alt	8840	14120	57846	ENST00000633551.1	ENSG00000278032.2	ENSG00000278032	HSCHR8_4_CTG7	8270	14120	7543.07	-0.374186	0.128093	-2.92121	0.00348671	0.031647
ADH5	-0.753928	-0.639453	0.791548	chr4	99070977	99088788	17578	ENST00000296412.14	ENSG00000197894.12	ENSG00000197894	4	99070978	99088801	5102.1	-0.220783	0.0746894	-2.95601	0.00311642	0.029353
TIMM23B	0.373641	0.794162	0.792098	chr10	49942052	49974850	19774	ENST00000651259.3	ENSG00000204152.14	ENSG00000204152	10	49942049	49974850	331.241	0.499306	0.136006	3.67119	0.00024142	0.00412594
SNN	-0.656795	-0.680035	0.792582	chr16	11668454	11679152	15783	ENST00000329565.6	ENSG00000184602.6	ENSG00000184602	16	11668455	11679152	538.9	-0.265824	0.0845599	-3.14362	0.00166875	0.0188635
TUBA1B	-0.848173	-0.602889	0.792901	chr12	49127781	49131395	5391	ENST00000336023.9	ENSG00000123416.15	ENSG00000123416	12	49127782	49131397	55747.7	-0.291573	0.104619	-2.78699	0.00531998	0.0426865
CPVL	-0.550655	-0.723414	0.792902	chr7	28995234	29146537	3256	ENST00000265394.10	ENSG00000106066.15	ENSG00000106066	7	28995235	29195451	2162.71	-0.220024	0.0657937	-3.34414	0.000825374	0.0109079
GNA11	-0.600823	-0.703382	0.793145	chr19	3094361	3123999	1766	ENST00000078429.9	ENSG00000088256.9	ENSG00000088256	19	3094362	3123999	3596.78	-0.237035	0.0728993	-3.25154	0.00114782	0.0141386
ALAS1	-0.5377	-0.733172	0.79668	chr3	52198159	52214327	428	ENST00000484952.6	ENSG00000023330.15	ENSG00000023330	3	52198086	52214327	2180.48	-0.219031	0.0646252	-3.38925	0.000700838	0.00977728
PLD3	-0.378542	-0.798377	0.797292	chr19	40348694	40378485	3060	ENST00000409735.9	ENSG00000105223.21	ENSG00000105223	19	40348456	40389472	4544.04	-0.32536	0.0881574	-3.69068	0.000223659	0.00389651
TTF1	-0.164074	1.0996	0.798505	chr9	132375547	132406840	5663	ENST00000334270.3	ENSG00000125482.13	ENSG00000125482	9	132375548	132406851	956.215	0.464509	0.0913819	5.08316	3.71203e-07	1.59484e-05
SLC35A4	-0.754974	-0.650313	0.801001	chr5	140564827	140569100	14017	ENST00000323146.8	ENSG00000176087.16	ENSG00000176087	5	140564446	140569100	6860.77	-0.207501	0.0690238	-3.00622	0.00264519	0.0260509
ARPC5	-0.688109	-0.678509	0.80193	chr1	183620845	183635783	10814	ENST00000359856.11	ENSG00000162704.16	ENSG00000162704	1	183620846	183635783	4887.18	-0.273821	0.0872997	-3.13656	0.00170942	0.0192425
ZNF358	-0.788289	-0.638077	0.802056	chr19	7516102	7521025	17893	ENST00000597229.2	ENSG00000198816.7	ENSG00000198816	19	7515292	7521025	2331.21	-0.342471	0.116105	-2.94965	0.00318131	0.0296693
POLR2E	-0.742176	-0.657916	0.803027	chr19	1086573	1095375	2123	ENST00000615234.5	ENSG00000099817.12	ENSG00000099817	19	1086574	1095380	14007.5	-0.317342	0.104342	-3.04137	0.00235508	0.024096
DDOST	-0.258721	-0.854131	0.803337	chr1	20651776	20661369	38704	ENST00000602624.7	ENSG00000244038.11	ENSG00000244038	1	20651767	20661544	10520.6	-0.26092	0.0660821	-3.94841	7.86709e-05	0.00167997
LAPTM4A	-0.0404039	-0.943622	0.804218	chr2	20032649	20051628	1050	ENST00000175091.5	ENSG00000068697.7	ENSG00000068697	2	20032650	20051628	3646.25	-0.265139	0.0607823	-4.36211	1.28817e-05	0.000352579
PSAP	-0.299744	-0.84156	0.806727	chr10	71816297	71851251	17526	ENST00000394936.8	ENSG00000197746.15	ENSG00000197746	10	71816298	71851251	10941.5	-0.241457	0.0620664	-3.8903	0.000100119	0.00202568
EIF4A2	-0.720639	1.61416	0.80743	chr3	186783576	186789897	10055	ENST00000323963.10	ENSG00000156976.17	ENSG00000156976	3	186783205	186789897	5241.68	0.668088	0.0895339	7.46184	8.5324e-14	1.35314e-11
DAZAP2	-0.59659	-0.722224	0.807493	chr12	51238825	51243933	15455	ENST00000412716.8	ENSG00000183283.16	ENSG00000183283	12	51238724	51271362	3978.61	-0.223839	0.067045	-3.33864	0.000841891	0.0110719
STMN3	-0.853837	-0.61898	0.808302	chr20	63639711	63653424	17437	ENST00000370053.3	ENSG00000197457.10	ENSG00000197457	20	63639705	63657682	3311.27	-0.278625	0.0973747	-2.86137	0.00421809	0.0364779
ANKRD26	0.28485	0.852535	0.810867	chr10	27004115	27100494	3471	ENST00000376087.5	ENSG00000107890.17	ENSG00000107890	10	26973793	27100494	386.781	0.491969	0.124832	3.94103	8.11312e-05	0.0017252
PRMT9	0.0940547	0.930739	0.811632	chr4	147637784	147684163	11283	ENST00000322396.7	ENSG00000164169.13	ENSG00000164169	4	147637785	147684163	496.904	0.463134	0.107642	4.30255	1.68843e-05	0.000447537
NUFIP1	0.451008	0.791074	0.815767	chr13	44939248	44989471	1601	ENST00000379161.5	ENSG00000083635.8	ENSG00000083635	13	44939249	44989471	776.782	0.314431	0.0859825	3.65692	0.000255265	0.00431469
CD276	-0.809969	-0.646407	0.816392	chr15	73684382	73714514	2861	ENST00000318443.10	ENSG00000103855.18	ENSG00000103855	15	73683966	73714514	3879.38	-0.234648	0.0785259	-2.98816	0.00280661	0.0271692
NPC2	-0.921631	-0.606448	0.82081	chr14	74479939	74493305	4938	ENST00000555619.6	ENSG00000119655.11	ENSG00000119655	14	74476192	74494177	2340.35	-0.355439	0.126787	-2.80344	0.00505606	0.0412128
APMAP	-0.751183	-0.675622	0.820916	chr20	24962924	24992751	2548	ENST00000217456.3	ENSG00000101474.12	ENSG00000101474	20	24962925	24992751	3532.46	-0.201887	0.0646409	-3.12321	0.00178888	0.0198267
GM2A	-0.544998	-0.760932	0.822412	chr5	151253184	151270440	17218	ENST00000357164.4	ENSG00000196743.9	ENSG00000196743	5	151212150	151270440	2161.01	-0.25003	0.0710803	-3.51758	0.000435503	0.00664281
ADPRM	0.36049	0.835697	0.82243	chr17	10697593	10711558	12776	ENST00000379774.5	ENSG00000170222.12	ENSG00000170222	17	10697594	10711558	185.767	0.62549	0.16191	3.8632	0.000111913	0.00221893
PKM	-0.525427	-0.769285	0.822768	chr15	72199028	72231190	1007	ENST00000335181.10	ENSG00000067225.21	ENSG00000067225	15	72199029	72231819	55055.4	-0.267355	0.0751802	-3.55619	0.000376268	0.00588069
SFT2D1	-0.800032	-0.661705	0.825836	chr6	166319727	166342545	17894	ENST00000361731.4	ENSG00000198818.10	ENSG00000198818	6	166319728	166342576	2600.23	-0.282311	0.0922921	-3.05888	0.00222164	0.0230146
TUBGCP5	0.0345777	0.972299	0.826264	chr15	22999176	23039569	56190	ENST00000615383.5	ENSG00000275835.5	ENSG00000275835	15	22983192	23039572	932.606	0.392853	0.0874042	4.49467	6.96773e-06	0.000207569
TUBGCP5	0.0345777	0.972299	0.826264	chr15_KI270848v1_alt	96178	136694	56969	ENST00000620361.3	ENSG00000276856.3	ENSG00000276856	HSCHR15_1_CTG3	80186	136694	932.606	0.392853	0.0874042	4.49467	6.96773e-06	0.000207569
TUBGCP5	0.0345777	0.972299	0.826264	chr15_KI270906v1_alt	1629	4406	59990	ENST00000625753.1	ENSG00000280807.2	ENSG00000280807	HSCHR15_2_CTG3	1630	4406	932.606	0.392853	0.0874042	4.49467	6.96773e-06	0.000207569
IGFBP2	-0.924576	-0.613402	0.827636	chr2	216633419	216664436	4437	ENST00000233809.9	ENSG00000115457.10	ENSG00000115457	2	216632828	216664436	3360.02	-0.333815	0.117723	-2.83559	0.00457414	0.0386579
FOXM1	-0.956207	-0.601104	0.828068	chr12	2857679	2877174	3860	ENST00000359843.8	ENSG00000111206.13	ENSG00000111206	12	2857680	2877174	5920.3	-0.169357	0.0609476	-2.77874	0.00545705	0.0435273
EFHD2	-0.794058	-0.666827	0.828099	chr1	15409887	15430339	8275	ENST00000375980.9	ENSG00000142634.13	ENSG00000142634	1	15409888	15430339	3102.97	-0.233582	0.0757754	-3.08256	0.0020523	0.021762
PERP	-0.648982	-0.725747	0.828225	chr6	138088504	138107419	4063	ENST00000421351.4	ENSG00000112378.12	ENSG00000112378	6	138088505	138107419	3249.73	-0.260273	0.0775793	-3.35493	0.00079385	0.0106083
MYADM	-0.568919	-0.758231	0.828268	chr19	53867882	53876435	14752	ENST00000391770.9	ENSG00000179820.16	ENSG00000179820	19	53864763	53876435	766.229	-0.36843	0.105113	-3.5051	0.000456444	0.00690363
SOX12	-0.908118	-0.625438	0.832133	chr20	325551	330224	14376	ENST00000342665.5	ENSG00000177732.9	ENSG00000177732	20	325552	330224	3571.49	-0.188349	0.0651449	-2.89123	0.0038374	0.0338646
TOP3B	-0.0398254	1.03084	0.832524	chr22	21957024	21982787	2174	ENST00000357179.10	ENSG00000100038.20	ENSG00000100038	22	21957025	21982813	1721.4	0.476032	0.0998961	4.76527	1.88602e-06	6.87124e-05
ITM2C	-0.557495	-0.768956	0.833375	chr2	230864941	230879248	7177	ENST00000326427.11	ENSG00000135916.16	ENSG00000135916	2	230864639	230879248	3843.23	-0.25836	0.0726818	-3.55467	0.000378449	0.00590621
THAP9-AS1	-1.52809	2.42485	0.83569	chr4	82893008	82900960	41146	ENST00000504520.6	ENSG00000251022.6	ENSG00000251022	4	82893009	82900960	1193.11	1.06941	0.0954031	11.2094	3.66619e-29	3.59419e-26
FKBP1B	-0.670136	-0.727104	0.836541	chr2	24049740	24063681	4969	ENST00000380986.9	ENSG00000119782.14	ENSG00000119782	2	24049701	24063681	593.067	-0.412646	0.122768	-3.3612	0.000776038	0.0104349
ZC3H12A	-0.812757	-0.670238	0.837302	chr1	37474579	37484377	11168	ENST00000373087.7	ENSG00000163874.11	ENSG00000163874	1	37474580	37484377	159.956	-0.426651	0.137704	-3.09833	0.00194617	0.0210717
ZMYM5	-0.562162	1.52857	0.838948	chr13	19823481	19863649	6689	ENST00000337963.9	ENSG00000132950.19	ENSG00000132950	13	19823482	19863649	295.477	0.814787	0.115308	7.06617	1.59267e-12	2.06931e-10
LETM2	0.244496	0.903087	0.839521	chr8	38386475	38409527	11516	ENST00000379957.9	ENSG00000165046.13	ENSG00000165046	8	38386207	38409527	152.487	0.650151	0.155735	4.17472	2.98349e-05	0.000741335
PMP22	-0.530265	-0.787902	0.840006	chr17	15229778	15265326	3636	ENST00000312280.9	ENSG00000109099.16	ENSG00000109099	17	15229773	15272292	384.87	-0.362507	0.0995283	-3.64225	0.00027026	0.00451564
CFL1	-0.793411	-0.683028	0.841452	chr11	65854672	65858180	13381	ENST00000308162.10	ENSG00000172757.13	ENSG00000172757	11	65823022	65862026	35379.3	-0.372979	0.118127	-3.15745	0.00159154	0.0182393
NREP	-0.956329	-0.619273	0.84333	chr5	111729302	111757194	6997	ENST00000257435.12	ENSG00000134986.14	ENSG00000134986	5	111662621	111997464	1186.64	-0.310925	0.108611	-2.86273	0.00420011	0.0363515
RABAC1	-0.656263	-0.743293	0.845394	chr19	41956682	41959321	3106	ENST00000222008.11	ENSG00000105404.11	ENSG00000105404	19	41956681	41959321	3082.05	-0.408763	0.118963	-3.43604	0.000590288	0.00846497
SMOC1	-0.701436	-0.72601	0.846246	chr14	69879415	70032366	17850	ENST00000361956.8	ENSG00000198732.11	ENSG00000198732	14	69854131	70032366	1588.07	-0.258514	0.0770272	-3.35615	0.00079037	0.0105749
IFRD1	-0.493678	1.48008	0.847954	chr7	112450459	112477203	149	ENST00000403825.8	ENSG00000006652.15	ENSG00000006652	7	112422887	112481017	1922.97	0.569348	0.0832138	6.84199	7.81029e-12	9.05658e-10
FHL1	-0.329313	-0.878977	0.848108	chrX	136147532	136211354	415	ENST00000394155.8	ENSG00000022267.19	ENSG00000022267	X	136146702	136211359	8963.01	-0.195165	0.0480315	-4.06327	4.83901e-05	0.00112739
OS9	-0.423783	-0.844838	0.851567	chr12	57694131	57721557	7103	ENST00000315970.12	ENSG00000135506.17	ENSG00000135506	12	57693841	57728342	5332.14	-0.233455	0.0597766	-3.90545	9.40486e-05	0.00193554
CHPF	-0.644488	-0.759621	0.855077	chr2	219538953	219543809	5444	ENST00000243776.11	ENSG00000123989.15	ENSG00000123989	2	219538954	219543809	2694.98	-0.24695	0.0703256	-3.51152	0.00044555	0.00677689
CEP295	-0.319108	1.32661	0.855684	chr11	93661681	93730358	11745	ENST00000325212.11	ENSG00000166004.15	ENSG00000166004	11	93661682	93730358	805.698	0.864251	0.140928	6.13257	8.64699e-10	6.61341e-08
KIAA0930	-0.807513	-0.696491	0.857515	chr22	45192243	45240894	2288	ENST00000336156.10	ENSG00000100364.19	ENSG00000100364	22	45192244	45240894	3521.12	-0.18416	0.0571982	-3.21968	0.00128332	0.0154975
CERS2	-0.690776	-0.745272	0.858765	chr1	150965185	150974835	8403	ENST00000368954.10	ENSG00000143418.20	ENSG00000143418	1	150960583	150975003	6525.24	-0.195204	0.05666	-3.44519	0.000570668	0.00826051
KLHDC3	-0.648011	-0.762846	0.858975	chr6	43014248	43021294	5575	ENST00000326974.9	ENSG00000124702.19	ENSG00000124702	6	43014103	43021298	7740.49	-0.340178	0.0964654	-3.52643	0.000421204	0.00643381
TMED9	-0.856108	-0.680896	0.860942	chr5	177592202	177597242	15833	ENST00000332598.7	ENSG00000184840.12	ENSG00000184840	5	177592203	177597242	8459.11	-0.231095	0.0734196	-3.14759	0.00164621	0.0186578
SSR3	-0.980488	-0.630931	0.861295	chr3	156539552	156555117	4341	ENST00000265044.7	ENSG00000114850.7	ENSG00000114850	3	156539553	156555149	5877.55	-0.177638	0.0609055	-2.91662	0.00353847	0.0319588
TRMT44	-0.908385	1.91321	0.866107	chr4	8440776	8476555	9867	ENST00000389737.5	ENSG00000155275.19	ENSG00000155275	4	8436140	8493531	648.058	0.927414	0.104861	8.84425	9.21428e-19	3.31223e-16
FADS2	-0.610674	-0.788312	0.867637	chr11	61828299	61867354	6970	ENST00000278840.9	ENSG00000134824.14	ENSG00000134824	11	61792980	61867354	2999.97	-0.325271	0.0892584	-3.64415	0.000268279	0.00449941
GPC3	-0.43743	-0.861352	0.870033	chrX	133535744	133985594	8965	ENST00000370818.8	ENSG00000147257.16	ENSG00000147257	X	133535745	133987100	1694.58	-0.26654	0.0669398	-3.98179	6.83977e-05	0.0014871
CDC6	0.719906	0.747254	0.870311	chr17	40287878	40304657	2007	ENST00000209728.9	ENSG00000094804.12	ENSG00000094804	17	40287879	40304657	4714.82	0.224213	0.0649075	3.45435	0.000551621	0.00805299
PVT1	0.230922	0.94708	0.87177	chr8	127794540	128187101	40373	ENST00000651587.1	ENSG00000249859.14	ENSG00000249859	8	127794526	128187101	235.773	0.713091	0.162877	4.37809	1.19723e-05	0.000334479
PPP3CC	1.02382	0.627542	0.873161	chr8	22441077	22541125	5121	ENST00000240139.10	ENSG00000120910.15	ENSG00000120910	8	22440819	22541142	344.941	0.371162	0.127945	2.90095	0.00372031	0.0331021
DANCR	-1.07667	-0.60649	0.873461	chr4	52712500	52721683	27604	ENST00000444958.2	ENSG00000226950.8	ENSG00000226950	4	52712325	52723623	5093	-0.374628	0.133622	-2.80363	0.00505302	0.0412128
GDI1	-0.490146	-0.844411	0.873731	chrX	154437153	154443467	19698	ENST00000447750.7	ENSG00000203879.12	ENSG00000203879	X	154436913	154443467	7078.84	-0.252079	0.064578	-3.90348	9.48193e-05	0.00194398
[truncated: 138 more rows]

## Sheet: ESM
external_gene_name	bakR_score	DE_score	Mech_score
[truncated: 307 more rows]

## Sheet: TCM
external_gene_name	bakR_score	DE_score	Mech_score
[truncated: 71 more rows]

[truncated: 1 more sheets: OSL]
